# Supplementary material for: Unmasking alternative splicing inside protein-coding exons defines exitrons and their role in proteome plasticity
Source: HighWire-hosted journal article supplement (doi:10.1101/gr.186585.114), 2015-05-01
Supplement: Supplemental_Information.docx [file Supplemental_Information.docx]

**SUPPLEMENTAL INFORMATION**

**Unmasking alternative splicing inside protein-coding exons defines exitrons and their role in proteome plasticity**

Yamile Marquez1, Markus Höpfler1,3, Zahra Ayatollahi1, Andrea Barta1, Maria Kalyna1,2*

1Max F. Perutz Laboratories, Medical University of Vienna, Vienna, A-1030, Austria

2Department of Applied Genetics and Cell Biology, BOKU – University of Natural Resources and Life Sciences, Vienna, A-1190, Austria

3Present address: Department of Molecular Cell Biology, Max Planck Institute of Biochemistry, Martinsried, 82152, Germany

*Correspondence: [mariya.kalyna@boku.ac.at](mailto:mariya.kalyna@boku.ac.at) or [mariya.kalyna@univie.ac.at](mailto:mariya.kalyna@univie.ac.at)

**SUPPLEMENTAL RESULTS**

**Validation of *Arabidopsis* exitron-spliced isoforms**

In our previous work ([Marquez et al. 2012](#_ENREF_34)) we validated splicing of nine exitrons (previously termed cryptic introns) by RT-PCR using cDNA preparations of wild-type Col-0 10-day old seedlings and flowers; three of them have lengths of multiples of three nucleotides (EIx3) (AT1G66970, *SVL2* putative glycerophosphoryl diester phosphodiesterase 3; AT1G77380, *AAP3* amino acid permease 3; and AT1G79790, flavin mononucleotide hydrolase 1). To further validate exitrons identified by RNA-seq, we used the high-resolution alternative splicing RT-PCR (HR RT-PCR) panel along with Sanger sequencing of RT-PCR products. The HR RT-PCR panel is a sensitive RT-PCR platform that allows monitoring of alternative splicing (AS) events in multiple genes and is capable of distinguishing small size differences in transcripts (as few as 2-3 nt) ([Simpson et al. 2008a](#_ENREF_44); [Simpson et al. 2008b](#_ENREF_45)). The current HR RT-PCR panel contains 273 primer pairs amplifying AS transcripts from 256 different genes ([Kalyna et al. 2012](#_ENREF_31); [Marquez et al. 2012](#_ENREF_34)), six of which contain exitrons. We examined whether amplicons corresponding to exitron-spliced isoforms are present in our HR RT-PCR panel data sets ([Kalyna et al. 2012](#_ENREF_31)). The HR RT-PCR and sequencing data confirmed exitron-spliced isoforms in five out of six genes (AT1G69250, *NTF2* nuclear transport factor 2 and RNA recognition motif-containing protein; AT1G77080, *MAF1/FLM* agamous-like MADS-box protein *AGL27*; AT2G43410, *FPA* flowering time control protein; AT3G06510, *SFR2* beta-glucosidase-like protein; and AT4G34000, *ABF3* abscisic acid responsive elements-binding factor 3). Additionally, four other genes included in the HR RT-PCR panel (AT1G09000, *NP1/MAPKKK1* NPK1-related protein kinase 1/MAP KINASE KINASE KINASE 1; AT1G27770, *ACA1* autoinhibited Ca2+-ATPase 1; AT2G33480 *NAC041* NAC domain containing protein 41; and AT4G13850, *ATGRP2* glycine-rich RNA-binding protein 2) showed exitron splicing events that were not detected by RNA-seq, implying that the exitron set identified by this RNA-seq experiment is not exhaustive. This is consistent with our previous observation ([Marquez et al. 2012](#_ENREF_34)) that the HR RT-PCR panel can detect a higher number of AS events due to its sensitivity and to the variety of different samples and conditions analyzed.

Further, we checked whether exitron-spliced transcripts are supported by ESTs. We found that the splicing of 100 exitrons (57 of them are EIx3s) in 98 genes is supported by at least one EST in publicly available databases (Supplemental Table 2). Moreover, ESTs validate exitron splicing in six intronless genes: AT3G07390 (*AIR12* auxin-induced in root cultures protein 12), AT3G11640 (hypothetical protein), AT3G49750 (*RLP44* receptor like protein 44), AT4G16580 (putative protein phosphatase 2C), AT5G39471 (Cysteine/Histidine-rich C1 domain family protein), and AT5G52810 (NAD(P)-binding Rossmann-fold superfamily protein) (Supplemental Table 2). To get additional evidence of exitron splicing in the intronless genes we have selected five genes to test by RT-PCRs (AT1G16390, 3-Oct organic cation/carnitine transporter 3; AT1G43980, Tetratricopeptide repeat (TPR)-like superfamily protein; AT1G63100, GRAS family transcription factor, scarecrow-like protein 28; AT5G22630, *ADT5* arogenate dehydratase 5; and AT5G67080, *MAPKKK19* mitogen-activated protein kinase kinase kinase 19). Though these genes are annotated in TAIR (The *Arabidopsis* Information Resource) as intronless, we further verified using our RNA-seq data that they are not parts of longer intron-containing genes and manually curated 5’ and 3’ UTRs when they were absent in TAIR gene annotations (Supplemental Fig. 2). The RT-PCRs using RNA isolated from *A. thaliana* flowers showed products corresponding to exitron-spliced isoforms (Supplemental Fig. 2 and Supplemental Table 4). Altogether, these results provide EST evidence for exitron-spliced transcripts and verify alternative splicing in the intronless genes *via* usage of exitrons.

ESTs, RT-PCR and cDNA library preparation for RNA-seq all involve the use of reverse transcriptase which is known to produce various artefacts leading to erroneous products ([Houseley and Tollervey 2010](#_ENREF_29)). To discard the possibility that exitrons are products of reverse transcription artefacts ([Houseley and Tollervey 2010](#_ENREF_29)), we *in vitro* transcribed genomic regions of five genes harbouring exitrons of *A. thaliana* Col-0 ecotype and performed RT-PCRs. No products corresponding to exitron-spliced isoforms were observed in the *in vitro* transcribed DNA samples but were obtained in cDNA preparations of total RNA, implying that these transcripts are indeed splicing products (Supplemental Fig. 3). Moreover, three of these five genes (AT1G53350, AT3G25030 and AT3G07930) harbour single nucleotide polymorphisms (SNPs) in exitron 5’SS or 3’SS or branch point signals, respectively, in *A. thaliana* Ler-0 ecotype (see Fig. 3C). RT-PCRs using Ler-0 total RNA revealed that these SNPs abolished or strongly down regulated exitron splicing events (see Fig. 3C), thus further corroborating the requirement for splicing and intact core splicing signals. In addition, the peptide evidence (Supplemental Table 3) for different protein isoforms derived from exitron-containing genes provide further evidence that exitron-spliced isoforms are not methodological artefacts of the reverse transcription.

**Splicing of *Arabidopsis* exitrons can affect transcript levels via nonsense-mediated decay**

Splicing of some exitrons (non-EIx3) can introduce premature termination codons (PTCs) downstream of the exitron splice junction that might regulate mRNA levels through the nonsense-mediated decay (NMD) machinery (Fig. 1). To investigate whether transcripts that harbour PTCs due to exitron splicing are targets of NMD, we used mutant lines (*upf1-5* and *upf3-1* ([Hori and Watanabe 2005](#_ENREF_27); [Arciga-Reyes et al. 2006](#_ENREF_2); [Kalyna et al. 2012](#_ENREF_31))) that accumulate NMD-sensitive transcripts. We analyzed three genes with exitrons introducing PTCs upon splicing (PTC+) (AT1G71230, *AJH2*, COP9-SIGNALOSOME 5B; AT1G79970, unknown protein; and AT5G02110, Cyclin D7, *CYCD7*) alongside with three genes with EIx3 (AT1G04945, HIT-type Zinc finger family protein; AT1G75120, *RRA1* Reduced Residual Arabinose 1; and AT3G25030, RING/U-box superfamily protein) (Supplemental Fig. 4A). Indeed, levels of the PTC+ exitron-spliced transcripts were elevated in the NMD mutants when compared to wild-type plants (Supplemental Figs. 4B and 4C). As expected, the EIx3-splicedtranscripts did not show any changes in transcripts levels (Supplemental Figs. 4B and 4C). Additionally, EIx3-spliced transcripts of other genes analyzed using the HR RT-PCR panel (see above) were not affected in *upf* mutant lines in contrast to exitron splicing events introducing PTC in the NMD sensible context ([Kalyna et al. 2012](#_ENREF_31)). These results demonstrate that exitron splicing can also regulate the steady state mRNA levels through the production of NMD-targeted transcripts and thus can affect protein abundance.

**Exitron splicing in *Arabidopsis* is differentially regulated in different tissues and stress conditions**

We investigated the possible functional relevance of exitron splicing events focusing on the EIx3 set. The generation of alternatively spliced isoforms is well known to being regulated in a tissue-specific manner, during different developmental stages and environmental conditions ([Pan et al. 2008](#_ENREF_36); [Wang et al. 2008](#_ENREF_54); [Staiger and Brown 2013](#_ENREF_46)). The exitrons were identified by RNA-seq of RNA from wild-type seedlings and flowers mixed in equal concentrations ([Marquez et al. 2012](#_ENREF_34)). To examine whether exitron splicing can be differentially regulated in different tissues we analyzed ten randomly chosen EIx3-containing genes (Fig. 3A, Supplemental Table 4) in separate cDNA preparations from seedlings and flowers. The ratios of the full-length and exitron-spliced isoforms were significantly different in these samples in five of the ten genes tested, implying tissue regulation of exitron splicing (Fig. 3B, Supplemental Figs. 6A and 6B). In addition, we observed that some exitron-spliced isoforms were abundant, up to 50% of total transcripts (Supplemental Figs. 6A and 6B). These observations imply a role for exitron splicing as a regulatory mechanism of tissue protein diversity. Moreover, differences in the exitron splicing ratio in flowers and seedlings (which were not perturbed by any stress conditions or mutations) provide further evidence that exitron splicing is an authentic process and not erroneous recognition of decoy splice sites by the spliceosome.

As gene ontology classification of EIx3-containing genes demonstrated an enrichment of genes involved in response to stresses (Supplemental Fig. 5), we further examined the changes in exitron splicing under a variety of stresses (Fig. 3B, Supplemental Figs. 6C-E). For each EIx3-containing gene tested we detected at least one condition where splicing of exitrons was significantly affected, with methyl jasmonate (involved in plant defence and development) and mannitol (osmotic stress and plant defence) treatments having the broadest effect on exitron splicing (Fig. 3B, Supplemental Figs. 6C-E). Although exitron-spliced isoform expression varied between the distinct stresses, it was not altered in all of the stress conditions suggesting that exitron splicing is not the result of a general stress response but rather that its regulation might be specific to certain stresses.

**Exitron splicing in *Arabidopsis* responds to changes in levels of splicing factors**

Serine/arginine-rich (SR) proteins are splicing regulators that bind mostly to exonic splicing enhancers, promote splice site selection and thus influence a variety of alternative splicing events ([Zhong et al. 2009](#_ENREF_58); [Reddy et al. 2013](#_ENREF_41)). To investigate whether SR proteins can affect exitron splicing, we analysed exitron usage in mutant and overexpression lines of two plant-specific SR proteins, At-RS31 and At-RS2Z33, as well as in an overexpression line of At-SR30, a homolog of the canonical mammalian SR protein, SFRS1 (ASF/SF2) (see Supplemental Methods). All three SR proteins have either positive or negative effects on exitron splicing in at least one of the genes tested (Fig. 3B, Supplemental Figs. 6F-G). Overexpression of At-RS31 has the most prominent effect on exitron splicing, altering the ratio of splice variants in half of the genes tested. These results show that *Arabidopsis* SR proteins impact directly or indirectly alternative splicing of the exitrons and that their effect is differential.

**Genetic variation in exitron sequences in *A. thaliana* ecotypes affects their splicing**

We found that exitron splicing varies between Ler-0 and Col-0 *A. thaliana* ecotypes (Fig. 3B and Supplemental Figs. 6H-I) due to the presence of single-nucleotide polymorphisms (SNPs) affecting either the 5’ splice site, or the 3’ splice site, or the branch point (Fig. 3C). Further analysis of SNP distribution in 82 natural *A. thaliana* ecotypes (Supplemental Tables 5-8) showed that, out of a total of 8,323 SNPs in 889 exitrons of 817 exitron-containing genes, 8% mapped to the 5' and 3' splice site signals whereby 2.2% either decreased or increased the score of the Position Weight Matrices of a splice site signal in at least one ecotype when compared to Col-0. We found that 89 SNPs (1.07% of total number of SNPs in exitron sequences) affected one of the conserved splice site dinucleotides in 9.3% (83 out of 892) of exitron-containing genes that is ~1.4-fold higher than the observed frequency (6.9%) of SNPs in splice sites of all *A. thaliana* protein-coding genes ([Cao et al. 2011](#_ENREF_9)) in the same *A. thaliana* ecotypes analysed. Additionally, 1.75% of SNPs mapped to putative branch point sequences. The remaining SNPs were located inside exitrons, where they could affect binding of splicing regulators. However, due to the limited information available on binding motifs of plant splicing factors, this possibility remains to be addressed experimentally. Next, we compared the SNP density in exitrons to that in coding and intronic regions derived from Cao et al., 2011 study. In general, about 34 SNPs map per 1 kb of exitron sequence, that is lower than the average SNP density across the *A. thaliana* genome (~44 SNPs per 1 kb, as derived from ([Cao et al. 2011](#_ENREF_9))). However, the SNP density in exitrons is higher than in coding exons and about two times lower than in introns (~27 SNPs and ~66 SNPs per 1 kb, respectively ([Cao et al. 2011](#_ENREF_9))). These observations suggest that exitron regions are evolving slower than introns and the genome in general, but slightly faster than coding exons. Interestingly, we observed that the SNP occurrences in exitron sequences are biased toward the third nucleotide of the codon (25.6, 22.1, and 52.3%) that most probably results in synonymous substitutions. Therefore, exitron SNPs follow the same constrictions as for any coding exon.

Our results show that genetic variability among ecotypes/populations affects exitrons and their core splicing signals. As many exitron-containing genes are involved in responses to biotic or abiotic stimuli (Supplemental Fig. 5), it is tempting to speculate that differential splicing of exitrons may play a role in the adaptation of *A. thaliana* ecotypes.

**Evidence of translation of *Arabidopsis* exitron-spliced transcripts**

To obtain evidence of translation of exitron-spliced transcripts, we searched for peptide support in proteomic datasets generated from different organs, developmental stages, and cell cultures ([Baerenfaller et al. 2008](#_ENREF_3); [Castellana et al. 2008](#_ENREF_10)). From the total set of 1002 exitron-spliced isoforms, 669 (in 611 genes) can be discriminated by *in silico* tryptic digestion. This number represents an overestimate considering that some of these isoforms are NMD targets. In total, we found peptides that support exitron splicing in eleven genes (Supplemental Table 3). In addition to peptides supporting EIx3–spliced isoforms, this set includes peptides which confirmed four isoforms where exitron splicing leads to a frameshift, thus altering the protein sequence downstream of the splice junction (Fig. 1, Supplemental Table 3). It is noteworthy that in several proteogenomic studies evidence for AS isoforms was obtained only for a limited number of genes - 16 in human ([Tanner et al. 2007](#_ENREF_48)), 47 in *A. thaliana* ([Castellana et al. 2008](#_ENREF_10)), 130 in *Drosophila* ([Tress et al. 2008](#_ENREF_51)) and 53 in mouse ([Brosch et al. 2011](#_ENREF_8)). We have identified protein isoforms for 1.8% of all exitron-containing genes that compares well to the 3.4% AS genes detected in mouse ([Brosch et al. 2011](#_ENREF_8)).

**sUPPLEMENTAL Figure Legends**

**Supplemental Figure 1.**

Comparisons of splice site score distributionsin exitrons and in different groups of introns in *A. thaliana*.

(A) 5’ splice site score. (B) 3’ splice site score. Splice site scores were evaluated by position weight matrices (see Supplemental Methods). Data presented as Tukey box plots.

**Supplemental Figure 2.**

Exitron splicing in *Arabidopsis thaliana* intronless genes.

(Left) Structures of intronless genes. Untranslated regions are shown in white and coding sequences in blue. Exitrons are shown in dark blue. Red carets indicate exitron splicing. (Right) RT-PCR products of full-length (filled triangle) and exitron-spliced isoforms (open triangle) of the intronless genes shown in the left panel.

**Supplemental Figure 3.**

RT-PCRs using *in vitro* transcribed genomic regions of five *A. thaliana* exitron-containing genes.

Regions containing exitrons and adjacent sequences were amplified from *A. thaliana* genomic DNA using the same primers as for RT-PCRs shown on the Fig. 3 and Supplemental Fig. 6 except T7 promoter sequence has been added to the forward primers. RNAs were transcribed with T7 RNA polymerase and treated with DNAse. These *in vitro* transcribed RNAs (IVT) were used in RT reactions (+RT) and no RT control for residual DNA contamination (-RT). RT-PCRs on IVT templates were compared to RT-PCRs performed on total RNA isolated from plants (cDNA). RT-PCRs on plant RNA produced two bands corresponding to the full-length and exitron-spliced (marked by a red asterisk) isoforms. No bands corresponding to the products of exitron splicing were detected in RT-PCRs on IVT templates.

**Supplemental Figure 4.**

Splicing of *Arabidopsis* exitrons with lengths of multiples of three nucleotides (EIx3) does not target transcripts for nonsense-mediated decay (NMD), while splicing of other *Arabidopsis* exitrons which introduce PTCs can affect transcript levels due to NMD.

(A) Structures of genes containing EIx3 which do not introduce premature termination codons (PTC) upon splicing (-PTC) and genes where exitron splicing results in PTC > 50 nt upstream of exon junction (+PTC). Coding exons are shown in blue. Untranslated regions are in white. Introns are shown as lines. Exitrons are shown in dark blue. Red carets indicate exitron splicing. PTC positions are illustrated by filled triangles and stop symbols. (B) RT-PCRs performed on total RNA isolated from 3 week-old wild type (WT), *upf1-5* and *upf3-1* mutant plants. Full-length and exitron-spliced isoforms are marked by filled and open triangles, respectively. Significant changes in the ratio of the exitron-spliced isoform in comparison to the respective WT control are illustrated by an arrow below the respective lane. Ubiquitin (UBQ) was used as a loading control (C) Full-length and exitron-spliced isoform quantification for 3B (see Supplemental Methods). The quantification was made for 3 independent biological replicates. P-values for significance tests: * p-value ≤ 0.1, ** p-value ≤ 0.05 and *** p-value ≤ 0.01.

**Supplemental Figure 5.**

Gene ontology classification of *Arabidopsis* EIx3-containing genes. Enrichment of GO categories was obtained using the Classification SuperViewer Tool w/ Bootstrap (<http://bar.utoronto.ca/ntools/cgi-bin/ntools_classification_superviewer.cgi>). 100 bootstraps were used to calculate the mean fold enrichment for each GO category and the hypergeometric distribution was used to calculate their respective p-values.

**Supplemental Figure 6**

Visualization and quantification of *Arabidopsis* full-length and exitron-spliced isoforms in different tissues, stress conditions and mutant backgrounds.

(A) RT-PCRs of wild type 10-day old seedlings (S) and flowers (F). (B) Quantification of the ratios of full-length and exitron-spliced isoforms for A (see Methods). (C) RT-PCRs of wild type 10-day old seedlings under various stresses (see Methods). SA – salicylic acid, MeJa – methyl jasmonate, MV – methyl viologen, ABA – abscisic acid, Man – mannitol, UV-C – ultraviolet C. (D) and(E) Quantification of the ratios of full-length and exitron-spliced isoforms for C (see Methods). (F) RT-PCRs of 10-day old seedlings of SR protein overexpression and mutant lines (see Supplemental Methods). (G) Quantification of the ratios of full-length and exitron isoforms for F (see Supplemental Methods). (H) RT-PCRs of three-week old plants of *SUA* mutant lines in Col-0 (*sua-2*) and Ler-0 (*sua-1*) ecotype backgrounds. WT corresponds to wild type Col-0 and Ler-0 plants. (I) Quantification of the ratios of full-length and exitron-spliced isoforms for (H). Significant change in the ratio of the exitron-spliced isoform in comparison with the respective controls is illustrated by up and down arrows below the respective lanes of the gels. n.d. – ratios were not calculated since exitron isoforms were not present due to SNPs disrupting the 5’ or 3’ splice sites (see Fig. 3C). The quantification was made for 3 independent biological replicates. Full-length and exitron-spliced isoforms are marked by filled and open triangles, respectively. Ubiquitin (UBQ) was used as a loading control. P-values for significance tests: * p-value ≤ 0.1, ** p-value ≤ 0.05 and *** p-value ≤ 0.01.

**Supplemental Figure 7.**

Exitron splicing in the eukaryotic translation initiation factor 4A is conserved in different species.

*Arabidopsis thaliana* homolog of human EIF4A1 is encoded by AT1G54270. Sequences are from *A. thaliana* (Ath), *Brassica napus* (Bna), *Raphanus raphanistrum* (Rra) and *Homo sapiens* (Hsa). FL – full-length isoform; EI – exitron-spliced isoform. Bna_EI_1, Bna_EI_2 and Bna_FL correspond to ESTs ES982326, EE481738 and EV026996, respectively. Rra_EI corresponds to EST EV536041. Hsa_EI is supported by EST AA095587. Nucleotide sequence alignment was performed using ClustalW (http://www.genome.jp/tools/clustalw/). Alignment at splice sites was corrected according to spliced alignment performed by GeneSeqer (http://www.plantgdb.org/cgi-bin/GeneSeqer/index.cgi). Shading was done using BOXSHADE (http://www.ch.embnet.org/software/BOX_form.html). Conserved dinucleotides at 5’ and 3’ splice sites are marked in red. Partial protein sequences for *A. thaliana* and *H. sapiens* are shown below nucleotide alignments. Sequences of the conserved motifs Q, I and Ia are marked by red boxes. Conserved phosphorylation sites within motif I (Walker A motif) are shaded in yellow.

**Supplemental Figure 8**.

Features of human exitrons.

Comparisons of 5’ (A) and 3’ (B) splice site score distributionsin exitrons and different groups of introns in human. Splice site scores were evaluated by position weight matrices (see Supplemental Methods). (C) Size distribution comparison of human and *A. thaliana* exitrons. Data presented as Tukey box plots.

**Supplemental Figure 9**.

Post-translational modifications (PTMs) in the protein sequences encoded by exitrons and other groups of exons in human.

Comparison was performed for subpopulations of constitutive and alternative exons with the same size distribution as the exitron population. P-values were calculated using Fisher’s exact test (see Supplemental Methods).

**Supplemental Figure 10.**

Nucleotide changes between exitron-containing *A. thaliana* genes and their paralogues.

(A) Nucleotide changes in the regions around the 5‘ splice sites of exitrons when compared to the corresponding regions in paralogous genes. Frequency of nucleotide changes (upper panel) and frequency of total changes by nucleotide position (bottom panel). (B) Nucleotide changes in the regions around the 3‘ splice sites of exitrons when compared to the corresponding regions in paralogous genes. Frequency of nucleotide changes (upper panel) and frequency of total changes by nucleotide position (bottom panel). Only the phase 0 exitrons are illustrated. Position +1 in A) corresponds to the first nucleotide of the exitron and to the first nucleotide of the codon. Position -1 in B) corresponds to the last nucleotide of the exitron and to the last nucleotide of the codon. NC – no change.

**Supplemental Figure 11**.

Examples of intron loss in the exitron regions.

(A) Exitron sequence in the AT2G29630 gene encoding THIC, a protein involved in thiamin biosynthesis, corresponds to three exons in the green alga *Chlamydomonas reinhardtii* gene. The right border of the exitron coincides precisely with the intron position in *C. reinhardtii*. The left border is shifted by two amino acids. (B) The exitron sequence in the AT3G52950 gene encoding CBS/octicosapeptide/Phox/Bemp1 domain-containing protein corresponds to four and half exons in the paralogous and orthologous genes. The right border of the exitron coincides precisely with the intron position in the orthologues and in an intron-containing paralogue. The left border is located in the middle (20 and 24 aa split) of the corresponding 3rd exon. Gene structures are derived from spliced alignments of the genomic sequences and corresponding coding sequences for each species. Spliced alignments were performed using GeneSeqer (http://www.plantgdb.org/cgi-bin/GeneSeqer/index.cgi). Exitrons and corresponding regions in the paralogous/orthologous genes are indicated by red boxes. Alternative transcripts in paralogue AT5G63490 (shown in green) are derived from RNA-seq of normalized cDNA library prepared from flowers and 10-day old seedlings ([Marquez et al. 2012](#_ENREF_34)). (C) Intron positions in the orthologous protein sequences of *A. thaliana* CBS/octicosapeptide/Phox/Bemp1 domain-containing protein (AT3G52950.1) visualized using Malin software (<http://www-labs.iro.umontreal.ca/~csuros/introns/malin/>) (see Supplemental Methods). Intron phases are marked with different colors; phase 0 - blue, phase 1 – red, and phase 2 - green. A red box in *A. thaliana* AT3G52950.1 highlights the exitron sequence. The alternatively spliced paralogue AT5G63490.1 (see B) is highlighted in green color. Ath – *Arabidopsis thaliana*, Bra – *Brassica rapa*, Atr – *Amborella trichopoda*, Sly – *Solanum lycopersicum*, Vvi – *Vitis vinifera,* Osa – *Oryza sativa*, Smo – *Selaginella moellendorffii*, Ppa – *Physcomitrella patens.*

**Supplemental Figure 12.**

Exitron splicing in the highly conserved glycine cleavage system (GCS) T-protein.

(A) Alignment of GCS T-protein orthologues and intron position mapping. Protein sequences are from *Arabidopsis thaliana* (Ath), *Arabidopsis lyrata* (Aly), *Brassica rapa* (Bra), *Vitis* *vinifera* (Vvi), *Populus trichocarpa* (Ptr), *Oryza sativa* (Osa), *Physcomitrella patens* (Ppa), *Selaginella* *moellendorffii* (Smo), *Volvox* *carteri* (Vca), *Chlamydomonas reinhardtii* (Cre), and *Homo sapiens* (Hsa). Numbers after species identifiers indicate paralogues. Ath_FL – *A. thaliana* full-length protein isoform, Ath_EI – *A.thaliana* exitron-spliced isoform; Hsa_FL – human full-length protein isoform; Hsa_ES – human exon 4 skipped isoform. Protein alignment was performed using ClustalW (http://www.genome.jp/tools/clustalw/). Shading at 0.8 fraction was performed using BOXSHADE (http://www.ch.embnet.org/software/BOX_form.html). Intron positions are derived from spliced alignments of the genomic sequences and corresponding protein and coding sequences for each species. Spliced alignments were performed using GeneSeqer (http://www.plantgdb.org/cgi-bin/GeneSeqer/index.cgi). Intron positions are mapped onto protein alignment. Intron phases are indicated by colour: blue – phase 0; red – phase 1; green – phase 2. (B) Alignment of the coding sequences of GCS T-protein orthologs.Coding sequences are from *A. thaliana* (Ath), *A. lyrata* (Aly), *B. rapa* (Bra), *V.* *vinifera* (Vvi), *P. trichocarpa* (Ptr), *O. sativa* (Osa), *P. patens* (Ppa), *S.* *moellendorffii* (Smo), *V.* *carteri* (Vca), *C. reinhardtii* (Cre). Numbers at species identifiers indicate paralogues. Ath_FL – *A. thaliana* full-length protein isoform, Ath_EI – *A.thaliana* exitron-spliced isoform.Alignment of the coding sequences was performed using ClustalW (http://www.genome.jp/tools/clustalw/). Shading was performed using BOXSHADE (http://www.ch.embnet.org/software/BOX_form.html). Only the region adjacent to the exitron is shown. The protein sequence is shown below the alignment. Nucleotides aligning to the conserved GT and AG at 5’ and 3’ splice sites are marked red. Binding sites for splicing factors ETR3 (pink) and RBM5 (lime) as detected by SpliceAid 2 are shown as screenshots above the corresponding sequences. Nucleotides corresponding to RBM5 binding sites are marked green. (C) Exon 4 skipping in glycine cleavage system T-protein (AMT, aminomethyltransferase) is conserved in animals and removes a sequence overlapping with exitron in *A. thaliana*. Sequences are from *H. sapiens* (Hsa), *Macaca mulatta* (Mmu), *Pan troglodytes* (Ptr), *Pongo abelii* (Pab), *Equus caballus* (Eca), *Oryctolagus cuniculus* (Ocu), and *A. thaliana* (Ath). FL – full-length protein isoform, ES – exon 4 skipped isoform, EI – *A.thaliana* exitron-spliced isoform. Protein alignment was performed using ClustalW (http://www.genome.jp/tools/clustalw/). Shading was performed using BOXSHADE (<http://www.ch.embnet.org/software/BOX_form.html>).

**Supplemental Figure 13.**

Exitron in human *HSPA1A* (*HSP70-1A*) corresponds to three exons in *Ciona*.

(A) HSPA1A orthologue alignment and intron position mapping. Protein sequences are from *Homo sapiens* (Hsa) HSPA1A, *Ciona intestinalis* (Cin) ENSCING00000009665, and *Ciona savignyi* (Csa) ENSCSAVG00000004764. Hsa_HSPA1A_FL – human full-length protein isoform; Hsa_HSPA1A_EI – human protein isoform resulting from exitron splicing. Exitron splicing in human *HSPA1A* is supported by the full-length cDNA from kidney (AK096017). The exitron left and right borders coincide with the exon1-exon2 and exon4-exon5 junctions in *Ciona* orthologues, respectively. Protein alignment was performed using ClustalW (http://www.genome.jp/tools/clustalw/). Shading was performed using BOXSHADE (http://www.ch.embnet.org/software/BOX_form.html). Intron positions are mapped onto protein alignment. Intron phases are indicated by colour: blue – phase 0; red – phase 1; green – phase 2. Intron positions are derived from spliced alignments of the genomic sequences and corresponding protein and coding sequences for each species. Spliced alignments were performed using GeneSeqer http://www.plantgdb.org/cgi-bin/GeneSeqer/index.cgi). (B) Partial alignment of the coding sequences of *HSPA1A* orthologs.Only the regions adjacent to the exitron borders are shown. The exitron 5’ splice site coincides with the exon1-exon2 junction in *Ciona* orthologues. The exitron 3’ splice site coincides with the exon4-exon5 junction in *Ciona* orthologues. Nucleotides aligning to the conserved GT and AG at 5’ and 3’ splice sites of the human exitron are marked red. Alignment of the coding sequences was performed using ClustalW (http://www.genome.jp/tools/clustalw/). Shading was performed using BOXSHADE (http://www.ch.embnet.org/software/BOX_form.html). Protein sequences are shown below the alignment.

**SUPPLEMENTAL TABLES**

**Supplemental Table 1.**

Exitrons (EI) detected in *Arabidopsis thaliana* by RNA-seq.

Information on *Arabidopsis* gene ID, exitron genomic coordinates, number of introns in the exitron-containing genes, number of introns in the coding regions and the corresponding gene annotations are according to TAIR10.

**Supplemental Table 2.**

Exitron (EI) splicing supported by ESTs in *Arabidopsis thaliana*.

The existence of exitron-spliced transcripts was verified using two publicly available EST datasets for *A. thaliana:* <http://www.plantgdb.org/> and [ftp://ftp.*Arabidopsis*.org/home/tair/](ftp://ftp.arabidopsis.org/home/tair/). ESTs were aligned to the corresponding exitron- containing genes using GeneSeqer (see Supplemental Methods).

**Supplemental Table 3.**

Peptides supporting exitron (EI) splicing in *Arabidopsis*.

Tryptic peptides supporting exitron-containing isoforms and exitron-spliced isoforms were obtained from two available proteomic studies for *Arabidopsis* ([Baerenfaller et al. 2008](#_ENREF_3); [Castellana et al. 2008](#_ENREF_10)).

**Supplemental Table 4.**

RT-PCR primers for exitron (EI) splicing validation in *Arabidopsis*.

**Supplemental Table 5.**

*Arabidopsis thaliana* ecotypes used in this study.

Single nucleotide polymorphisms (SNPs) for a total of 82 *A. thaliana* ecotypes were obtained at: <http://www.1001genomes.org/>.

**Supplemental Table 6**.

SNPs mapping to exitron (EI) sequences in *Arabidopsis thaliana* ecotypes.

SNPs in the corresponding ecotype were mapped using *Arabidopsis thaliana* Col-0 exitron genomic coordinates as reference.

**Supplemental Table 7.**

Ecotype SNPs that affect the exitron (EI) splicing signal score when compared to *Arabidopsis* thaliana Col-0 ecotype.

Position weight matrices (PWM) of the splice signals were used for obtaining the splicing signal score in Col-0 and the respective ecotype. Only the exitron SNPs that affected the PWM splicing signal score over 2 points are shown (see Supplemental Methods).

**Supplemental Table 8.**

Summary of SNPs affecting exitron (EI) splice sites in 82 *Arabidopsis thaliana* ecotypes.

A SNP was considered to affect the splicing signal if there was a change over 2 points in the position weight matrix (PWM) splicing signal score between the reference Col-0 and the respective ecotype (see Supplemental Table 7 and Supplemental Methods).

**Supplemental Table 9.**

PFAM domains overlapping with *Arabidopsis* exitrons (EI).

An exitron was considered to overlap with a PFAM domain if the EI encoded amino acid sequence comprised at least 20% of the PFAM domain (see Supplemental Methods).

**Supplemental Table 10.**

*Arabidopsis* exitron (EI) splicing boundaries in proximity to PFAM domain borders.

An exitron splice site boundary is considered to be in proximity to a PFAM domain border if the distance between them is less than 10 amino acids.

**Supplemental Table 11.**

Post-translational modification (PTM) sites located in the sequences encoded by *Arabidopsis* exitrons (EI).

Sets of experimental PTMs were retrieved from ([Wang et al. 2005](#_ENREF_55); [Saracco et al. 2009](#_ENREF_42); [Elrouby and Coupland 2010](#_ENREF_18); [Fares et al. 2011](#_ENREF_20); [Finkemeier et al. 2011](#_ENREF_21)). 65 EIx3-encoded sequences can be post-translationally modified. We have identified 49 peptides in EIx3–encoded sequences out of 287 total phosphopeptides in proteins encoded by EIx3-containing genes, 5 peptides for sumoylation (out of 11 total), 6 peptides for S-nitrosylation (out of 6 total), 2 for ubiquitylation (out of 6 total) and 2 for lysine acetylation (out of 7 total).

**Supplemental Table 12.**

*Arabidopsis* exitrons (EI) harbouring transmembrane domains.

Differential transmembrane architectures between exitron-spliced and full-length isoforms were predicted using TMHMM, SCAMPI and THUMBUP (see Supplemental Methods).

**Supplemental Table 13.**

Signal peptides predicted in full-length (FL) and exitron-spliced (EI) isoforms in *Arabidopsis*.

Signal peptides were predicted using PrediSi.

**Supplemental Table 14.**

ESTs supporting exitron (EI) splicing in EI-containing ortologues in *Arabidopsis lyrata.*

* - do not have EST support in *A. thaliana*.

**Supplemental Table 15.**

Examples of exitron splicing in animals described in the literature as intron retentions.

**Supplemental Table 16.**

Exitrons (EI) identified in human.

**Supplemental Table 17.**

Gene Ontology term enrichment in human genes containing exitrons with lengths of multiples of three nucleotides. Gene Ontology classification was performed using the tool GOEAST available at <http://omicslab.genetics.ac.cn/GOEAST/>. P-values for each category were calculated using the hypergeometric distribution and corrected using the Yekutieli procedure (false discovery rate).

**Supplemental Table 18.**

Peptides from different human tissue proteome datasets mapped to exitron-encoded protein sequences.

**Supplemental Table 19.**

PFAM domains overlapping with human exitrons (EI).

An exitron is considered to overlap with a PFAM domain if the exitron-encoded amino acid sequence comprised at least 20% of the PFAM domain.

**Supplemental Table 20.**

Splicing boundaries of human exitrons in proximity to PFAM domain borders.

An exitron splice boundary is considered to be in proximity to a PFAM domain border if the distance between them is less than 10 amino acids.

**Supplemental Table 21.**

Post-translational modification (PTM) sites located in the sequences encoded by human exitrons (EI).

**Supplemental Table 22.**

Differential exitron (EI) splicing in human tissues and its functional impact.

Differential percent of spliced in (PSI) values in the respective tissue or group of tissues are highlighted grey and shown in bold font. NA - information is not available. *Experimental validation is based on publications. Functional implications are based on published evidence when available or various dataset mining.

**Supplemental Table 23.**

Specificity of exitron (EI) splicing across human tissue transcriptomes.

"1", red cell - percent of spliced in (PSI) ≤ 90; "0", blue cell - PSI ≥ 90; "ne", white cell - EI-containing exon is lowly or not expressed in the tissue. Only exitron splicing events with a PSI ≤ 90 in at least one tissue are shown.

**Supplemental Table 24.**

Differential exitron (EI) splicing between normal (NBS) and ERBB2 positive breast cancer tissues and its functional implications.

PSI – “percent of spliced” values in the respective sample. NA - information is not available. *Experimental validation is based on publications. Functional implications are based on published evidence when available or various dataset mining.

**Supplemental Table 25.**

Exitrons (EI) in human intronless genes.

**Supplemental Table 26.**

Exonic/intronic identity of exitron (EI) orthologous region in different plant species.

E - exitron aligning to a coding exon in the orthologous gene, I - exitron aligning to an annotated intron in the orthologous gene, I(C) – exitron aligning to an annotated intron in the orthologous gene, but when translated in the frame of the upstream exon results in a coding sequence. “na” – not available, an orthologous sequence was not obtained using the search criteria (see Supplemental Methods).

**Supplemental Table 27.**

GC content, splice site score and % protein identity of paralogues of *Arabidopsis* exitron (EI)-containing genes.

**Supplemental Table 28**.

List of *Arabidopsis* exitrons (EI) with intron occurrences in paralogous regions.

**Supplemental Table 29.**

Intron occurrences in exitron (EI) orthologous regions in different plant species.

1 Gene sequences in *V. vinifera* are very long (>15,000 bp), thus they could not be analyzed by GeneSeqer but the overall gene structures and sizes of the coding exons are highly conserved between *P. trichocarpa* and *V. vinifera*. Intron occurrences in *V. vinifera* were inferred based on *P. trichocarpa* intron evidence and manually curated. *An intron is present in the EI orthologous region that coincides with at least one of the splicing boundaries of the EI. "na" – not available, an orthologous gene sequence was not obtained using the search criteria (see Supplemental Methods).

**SUPPLEMENTAL METHODS**

**Exitron set, features of exitrons and exitron-containing genes in *Arabidopsis***

The sets of exitrons (1,002), retained introns (5,631), constitutive introns (92,120), alternative introns (31,815), constitutive exons (100,124) and alternative exons (20,491) (all sets within annotated CDS only) were obtained from our RNA-seq of *Arabidopsis thaliana* normalized cDNA library prepared from flowers and 10-day old seedlings grown at 22°C and 16h light/8h dark cycle ([Marquez et al. 2012](#_ENREF_34)). Exitrons were identified by splice junctions resulting from the Tophat ([Trapnell et al. 2009](#_ENREF_50)) alignment mapping inside of the annotated protein-coding exons. Only splice junctions supported by at least three reads and with no mismatches in the spliced alignment (8 nucleotides upstream the 5’ splice site and 8 nucleotides downstream the 3’ splice site) were used to define the exitron set (Supplemental Table 1).

GC content and size distribution was obtained for exitrons and each group of introns and exons, and Mann-Whitney-Wilcoxon tests were performed for all the comparisons shown in Fig. 2B-E. Splice site strength for exitrons and different groups of introns (Supplemental Fig. 1) was evaluated by using position weight matrices (PWMs) ([Sheth et al. 2006](#_ENREF_43)). Ten intronic and three exonic bases were evaluated for 5′ splice sites, while 14 intronic and three exonic bases were considered for 3’ splice sites. Gene Ontology classification of the genes containing the exitrons whose lengths are multiple of three nucleotides (EIx3) was performed using the Classification SuperViewer tool ([Provart et al. 2003](#_ENREF_40)) available at <http://bar.utoronto.ca/ntools/cgi-bin/ntools_classification_superviewer.cgi>.

**Validation of *Arabidopsis* exitron-spliced isoforms**

To verify the existence of exitron-spliced transcripts, we used two publicly available EST datasets for *A. thaliana* (in total 1,846,638 ESTs): PlantGDB <http://www.plantgdb.org/> ([Duvick et al. 2008](#_ENREF_15)) and The Arabidopsis Information Resource (TAIR) [ftp://ftp.*Arabidopsis*.org/home/tair/](ftp://ftp.arabidopsis.org/home/tair/) on www.arabidopsis.org. ESTs were aligned to sequences of the genes containing exitrons using GeneSeqer ([Usuka et al. 2000](#_ENREF_52)) available at <http://www.plantgdb.org/cgi-bin/GeneSeqer/index.cgi>. The ESTs supporting the exitron splicing are reported in Supplemental Table 2. To further validate exitron-spliced transcripts we used the High Resolution RT-PCR Alternative Splicing Panel ([Simpson et al. 2008a](#_ENREF_44); [Simpson et al. 2008b](#_ENREF_45); [Kalyna et al. 2012](#_ENREF_31)), which contains 273 primers pairs designed to cover alternative splicing events in 256 genes including primer pairs to six genes with exitrons detected by the RNA-seq of the normalized cDNA library. Analysis of amplimers corresponding to exitron-spliced and exitron-containing isoforms has been performed as described previously ([Marquez et al. 2012](#_ENREF_34)). Exitron splicing in further exitron-containing genes included in the HR RT-PCR panel but not detected by this RNA-seq analysis was found by manual inspection of AS events.

To exclude possible artefacts of reverse transcription, genomic DNA of 10-day old seedlings was extracted using DNeasy Mini Kit (Qiagen). The *in vitro* transcription of genomic regions of five exitron-containing genes was performed using the TranscriptAid™ T7 High Yield Transcription Kit (Fermentas) according to manufacturer's instructions. The resulting *in vitro* transcribed RNA was treated with DNAse and used for cDNA preparation using the Reverse Transcription System Kit (Promega) with gene specific reverse primers (Supplemental Table 4). Control for residual DNA contamination was performed by omitting reverse transcriptase. PCR was performed under the following conditions: initial denaturation 98°C for 3 min, followed by 36 cycles of denaturation 98°C for 10 sec, annealing 60°C for 10 sec and extension 72°C for 30 sec, followed by a final extension at 72°C for 5 min. RT-PCRs on *in vitro* transcribed templates were compared to RT-PCRs performed on total RNA isolated from plants. The amplified products were visualized in a 2% agarose gel stained with ethidium bromide.

To validate exitron splicing in the intronless genes, total RNA was extracted from flowers using RNeasy Mini Kit (Qiagen) followed by oligo-dT cDNA preparation using the Reverse Transcription System Kit (Promega). PCR was performed under the following conditions: initial denaturation 98°C for 3 min, followed by 30 cycles (for AT1G16390, AT1G43980, AT1G63100) or 35 cycles (for AT5G22630, AT5G67080) of denaturation 98°C for 10 sec, annealing 60°C for 10 sec and extension 72°C for 30 sec, followed by a final extension at 72°C for 5 min. The amplified products were visualized in a 2% agarose gel stained with ethidium bromide. The primer pairs are listed in Supplemental Table 4.

Tryptic peptides supporting protein isoforms translated from exitron-containing and exitron-spliced transcripts were identified using available proteogenomic data sets for different organs, developmental stages, and cell cultures of *A. thaliana* ([Baerenfaller et al. 2008](#_ENREF_3); [Castellana et al. 2008](#_ENREF_10)) and are listed in Supplemental Table 3.

**Plant material, treatments and RT-PCRs**

To test NMD sensitivity of exitron-spliced and exitron-containing transcripts we used 3-week old plants of UPF1 and UPF3 mutant lines, *upf1-5 and upf3-1* ([Arciga-Reyes et al. 2006](#_ENREF_2)) alongside wild-type *A. thaliana* (Col-0) control plants. To test exitron splicing in different tissues, we used wild type (Col-0) 10-day old seedlings grown in ½ GM agar medium ([Valvekens et al. 1988](#_ENREF_53)) and flowers of plants grown in soil. To test the effect of SR proteins on exitron splicing the following overexpression and mutant lines were used: SR30-ox, overexpression line of At-SR30 ([Lopato et al. 1999](#_ENREF_33)), RS2Z33-ox, overexpression line of At-RS2Z33 ([Kalyna et al. 2003](#_ENREF_30)), RS31-ox, overexpression line of At-RS31 ([Petrillo et al. 2014](#_ENREF_38)); and RS31-mut (SALK_021332) and RS2Z33-mut (GABI_180D12), mutant lines of At-RS31 and At-RS2Z33, respectively (([Petrillo et al. 2014](#_ENREF_38)) and Kalyna et al., unpublished). The 10-day old seedlings of these lines were grown alongside with their wild-type control (Col-0). Three-week old plants of SUA mutant lines, *sua-1* and *sua-2* ([Sugliani et al. 2010](#_ENREF_47)) were used together with 3-week old wild type plants as controls (Ler-0 and Col-0 ecotypes, respectively).

To test the effect of different stresses, 10-day old seedlings grown in ½ GM agar medium were flooded with liquid ½ GM media containing one of the following substances: 10 µM salicylic acid, 10 µM methyl jasmonate, 10 µM of methyl viologen, 10 µM of abscisic acid, 150 mM NaCl or 300 mM mannitol. Liquid ½ GM medium without any additives was used as a control. Samples were collected after 3 hours. To test drought recovery, 10-day old wild type seedlings grown in ½ GM agar medium were exposed (in opened plates) to airflow in the laminar hood for 25 min and samples were collected after 3 hours. Control plants were subjected to the same procedure but kept in closed plates sealed with Parafilm. To test the effect of ultraviolet C (UV-C) irradiation, 7-day old seedlings grown in ½ GM agar medium were exposed to 100 J/m2 of UV-C generated by UV crosslinker (Stratalinker 2400, Stratagene). Following UV-C irradiation plates with seedlings were kept in the dark and samples were collected after 4 hours. Control plants were kept for 4 hours in the dark without previous UV-C irradiation.

All the experiments were performed in three biological replicates and plants were grown under 16h light/8h dark cycle at 22°C. RNA extraction was performed using RNeasy Mini Kit (Qiagen) followed by oligo-dT cDNA preparation using the Reverse Transcription System Kit (Promega). PCR was performed under the following conditions: initial denaturation 98°C for 3 min, followed by 28 cycles of denaturation 98°C for 10 sec, annealing 60°C for 10 sec and extension 72°C for 30 sec, followed by a final extension at 72°C for 5 min. The amplified products were visualized in a 2% agarose gel stained with SYBR-gold and the product bands were quantified using ImageLab 3.0 software. Mean and standard deviation were calculated from three independent biological replicates. Student's t-test was used to calculate p-values between samples and their respective controls. The primer pairs used for the PCR experiments are listed in Supplemental Table 4.

**Search for SUA/RBM5 binding motifs and *de novo* motif finding in *Arabidopsis***

RBM5 motifs were obtained from SpliceAid2 database ([Piva et al. 2012](#_ENREF_39)). The exact occurrences of these motifs in exitrons, different sets of introns and exons and the whole *A.thaliana* genome were extracted, and the density per kilobase was calculated. Binomial tests were applied to determine whether exitrons were enriched in these motifs when compared to other types of exons, introns and the genome. The program MEME from the MEME suite ([Bailey et al. 2009](#_ENREF_4)) (available at: <http://meme.nbcr.net/meme/>) was used for *de novo* motif finding in the exitron sequences. The two resulting motifs were used to calculate their density in the different sets of sequences (exons, introns and the genome). Binomial tests were applied to determine whether the exitron sequences were enriched in these motifs when compared to other types of exons, introns and the genome.

**Analyses of SNPs in the exitron sequences in 82 *A. thaliana* natural ecotypes**

SNPs in genomes of 82 different *A. thaliana* ecotypes (Supplemental Table 5) were acquired at <http://www.1001genomes.org/> ([Cao et al. 2011](#_ENREF_9)) and mapped to exitron sequences. A SNP was considered to be in the 5' splice signal if it was located 3 nt upstream to 10 nt downstream of the 5' splice site. A SNP was considered to be in the 3' splice site signal if it was located 14 nt upstream to 3 nt downstream of the 3' splice site. A SNP was classified as a splice site SNP if it mapped to the conserved dinucleotides of splice sites. The impact of the SNP on the splicing signal was evaluated using PWMs ([Sheth et al. 2006](#_ENREF_43)). For branch point predictions, the YUNAN sequence closest to the 3' splice site was chosen as the putative branch point and its genomic location was used to determine if SNPs reside in this region. SNP phase was obtained according to the annotated frame of the exitron-containing exon.

**Analysis of functional implications of *Arabidopsis* exitron splicing at the protein level**

The protein sequences for exitrons (EIx3), constitutive exons, alternative exons and exitron-containing exons were used to search PFAM protein domains employing hidden Markov models (HMMs) using HMMER ([Finn et al. 2011](#_ENREF_22)) (PFAM database release 25.0). Hits with an E-value<0.01 were considered as significant. An exitron was considered to encode a part of a protein domain if the protein sequence encoded by the exitron overlapped with at least 20% of the total domain. Binomial tests where applied to calculate the significance of the protein domain enrichment in the protein sequences encoded by exitrons and different groups of exons (constitutive exons, alternative exons and exons of exitron-containing genes, Fig. 4B). An exitron splice site boundary was considered to be in proximity to a PFAM domain border if the distance between the respective borders was less than 10 amino acids.

The IUPRED (short mode) ([Dosztanyi et al. 2005](#_ENREF_12)) and VSL2B ([Obradovic et al. 2005](#_ENREF_35); [Peng et al. 2006](#_ENREF_37)) programs (at <http://iupred.enzim.hu> and <http://www.dabi.temple.edu/disprot/predictor.php>, respectively) were used for the prediction of disordered regions. An exitron ((EIx3) or an exon (constitutive exons, alternative exons and exons of exitron-containing genes) was considered to code for disordered segments if a contiguous stretch of at least 20 amino acids was disordered. Short linear motifs (SLiMs) were predicted using the ANCHOR program ([Dosztanyi et al. 2009](#_ENREF_13)) (<http://anchor.enzim.hu/>). Binomial tests were applied to exitrons (EIx3) and to each category of exons to calculate the significance of disordered region and SLiM enrichments.

Experimentally verified post-translational modifications (PTMs) were obtained from the following sources: phosphorylation (PhosPhAt Database ([Heazlewood et al. 2008](#_ENREF_25); [Durek et al. 2010](#_ENREF_14); [Zulawski et al. 2013](#_ENREF_60)) at [http://phosphat.mpimp-golm.mpg.de](http://phosphat.mpimp-golm.mpg.de/)); sumoylation ([Elrouby and Coupland 2010](#_ENREF_18)), S-nitrosylation ([Fares et al. 2011](#_ENREF_20)), ubiquitylation ([Saracco et al. 2009](#_ENREF_42)) and lysine acetylation ([Finkemeier et al. 2011](#_ENREF_21)). Peptides for the different PTMs were mapped onto amino acid sequences encoded by exitrons (EIx3 set) (Supplemental Table 11). To check whether the enrichment of phosphorylation sites in the protein sequences encoded by *Arabidopsis* exitrons is not dependent on their bigger size in comparison to constitutive and alternative exons, we have generated, for each type of exons, 1000 random exon samples (n=459 exons) that follow the same size distribution as *Arabidopsis* exitrons. Exitrons and these different groups of exons were compared using Fisher’s exact test. Signal peptides within the protein sequences encoded by exitrons (EIx3 set) were predicted using PrediSi ([Hiller et al. 2004](#_ENREF_26)) at <http://www.predisi.de/>. Prediction of transmembrane regions within the protein sequences encoded by exitrons (EIx3 set) was performed using TMHMM ([Krogh et al. 2001](#_ENREF_32)) (<http://www.cbs.dtu.dk/services/TMHMM/>), SCAMPI ([Bernsel et al. 2008](#_ENREF_6)) (<http://scampi.cbr.su.se/index.php?about=SCAMPI>) and THUMBUP ([Zhou and Zhou 2003](#_ENREF_59)) (<http://sparks.informatics.iupui.edu/Softwares-Services_files/thumbup.htm>). Exitrons were considered to encode transmembrane domains when all three programs consistently reported different structures of protein isoforms encoded by exitron-spliced and exitron-containing splice variants (Fig. 4A, Supplemental Table 12).

**Identification and characterization of human exitrons**

**Human Ensembl exitrons dataset**

Ensembl (GRCh37, release 75 ([Flicek et al. 2013](#_ENREF_23)), <http://www.ensembl.org/>) derived exitron set was obtained from protein genes presenting transcripts with annotated retained introns. Only genes having a CCDS (consensus coding sequence) annotation were considered. A retained intron was reclassified as exitron only if the intron retention containing isoform is protein coding and has CCDS annotation, and the splicing of the intron produces a protein isoform with internal amino acid sequence deletion, or produces a frame-shift, or produces an NMD candidate (see Fig. 1). Only retained introns having sizes bigger than 50 nucleotides and GT-AG, GC-AG or AT-AC splice site dinucleotides were contemplated for further analysis.

**Human RNA-seq exitron dataset**

RNA-seq libraries for human brain, heart, liver, lung, ovary and testis tissues were obtained from ([Barbosa-Morais et al. 2012](#_ENREF_5)), and normal breast tissue (NBS) and ERBB2 positive breast cancer RNA-seq libraries were retrieved from ([Eswaran et al. 2013](#_ENREF_19)). Reads were aligned using Tophat 2.0.11 ([Trapnell et al. 2009](#_ENREF_50)) with the following parameters: -i 50 –I 15000 –a 15 –microexon search --library-type fr-unstranded --b2 very-sensitive and the annotated transcripts from Ensembl GRCh37 as scaffold.

Each of the human tissues has a library of 50 bp paired end reads and a library of 75 bp single end reads. In the cancer RNA-seq experiment, NBS consists of three biological replicates of 75 bp paired end reads, while ERBB2 samples consists of 5 biological replicates of 60 bp paired end reads. Each of the libraries was aligned independently. As splicing detection highly depends on the read length, we decided to reduce the 75 bp long reads of NBS samples to 60 bp to have a comparable sensitivity of splicing detection with ERBB2 samples. The fifth ERBB2 replicate was discarded due to a low alignment rate.

To identify exitrons in each sample, we obtained all the protein-coding exons in transcripts having a CCDS annotation. The splice junctions resulting from the Tophat alignment mapping inside of the protein-coding exons were considered if the supporting reads were present in all the biological replicates of each biological sample, have a minimum intron size of 50 nucleotides and present GT-AG, GC-AG or AT-AC splice site dinucleotides.

For the calculation of percent of spliced in (PSI) values, we have considered those exitrons that have at least three uniquely mapped reads in the splice junction and at least ten reads in the respective exitron-containing exon considering all the biological replicates. The PSI was calculated as described in the scheme and the formula below.

**D**

**C**

**B**

**A**

**Exitron**

A - reads aligning to -10 to +10 around 5’ splice site of an exitron

B - reads aligning in the -10 to +10 of the middle point of an exitron

C - reads aligning to -10 to +10 around 3’ splice site of an exitron

D - splice junction reads supporting exitron splicing

The PSI was calculated independently for each biological replicate followed by the calculation of the correlation between PSI values between replicates. All the biological replicates showed correlation coefficient values higher than 0.95, so the average PSI was obtained for comparing PSI between different samples. The PSI values were considered to be changing between samples only if there was a difference of at least 15 (see Supplemental Tables 22 and 24).

**Gene ontology classification for human exitron-containing genes**

Gene Ontology (GO) classification of EIx3-containing genes was performed using batch gene option of GOEAST tools ([Zheng and Wang 2008](#_ENREF_57)) (available at: <http://omicslab.genetics.ac.cn/GOEAST/tools.php>).

**Features of human exitrons**

For the analyses of human exitron features and their comparison to introns and exons, the sets of constitutive, alternative and retained introns and constitutive and alternative exons were obtained using Ensembl annotation. Only exons with a CCDS annotation were used for analyses. The splice site strength of exitrons and the different groups of introns was evaluated as in *Arabidopsis* using PWMs ([Sheth et al. 2006](#_ENREF_43)). For both 5’ and 3’ splice sites, however, three exonic bases and six intronic bases were used for obtaining the respective scores. GC content and size distributions were obtained for exitrons and each group of introns and exons, and Mann-Whitney-Wilcoxon tests were performed for all the comparisons.

**Proteomic support for human exitrons**

For proteomic support of exitron translation, we retrieved uniquely assigned peptides obtained from different tissues (([Wilhelm et al. 2014](#_ENREF_56)) [www.proteomicsdb.org](http://www.proteomicsdb.org), see Supplemental Table 18) and mapped them to the translated sequences of the exitron-containing and exitron-spliced exons. The protein sequences were derived using start codons of the reference proteins of the respective exitron-containing genes.

**Analyses of domains, disordered regions, SLiMs and post-translational modification sites encoded by human exitrons**

Modified protein peptides were obtained from the Phosphosite database ([Hornbeck et al. 2015](#_ENREF_28)) (http://www.phosphosite.org/). Only peptides that are assigned to a single gene were used further. The peptides were mapped to the translated sequences of exitron-containing exons, exitron-spliced exons, other exons of exitron-containing genes, alternative exons and constitutive exons. The translation was according to annotated start codons of respective reference proteins. The sets of alternative and constitutive exons were obtained using Ensembl annotation and only exons with a CCDS annotation were used for analysis. Binomial tests were applied to test enrichment in phosphorylation and ubiquitylation sites in exitrons and different groups of exons (alternative exons and constitutive exons, see Fig. 6E-F). As for *Arabidopsis* exitrons, in order to discard a possibility that the enrichment of phosphorylation and ubiquiytilation sites in human exitrons is due to their bigger size, we have generated 1000 random samples for constitutive and alternative exons (n=503 exons) with the same size distributions as in human exitrons. These exon samples and exitrons were compared using Fisher’s exact test (see Supplemental Fig. 9). The analyses of PFAM domains, disordered regions and SLiMs (Fig. 6A-C) and their enrichment were performed using the same pipeline as for *Arabidopsis* exitrons.

**Evolutionary studies of exitrons**

The list of *A. thaliana* paralogues ([Bolle et al. 2013](#_ENREF_7)) of the exitron-containing genes was obtained at http://www.gabi-kat.de/db/duplo_genepairs.php. Alignments between the exitron-containing genes and the respective paralogues were performed, followed by mapping the exitron regions and counting the number and type of substitutions that occur between pairs of paralogues.

The set of orthologous genes was produced using the reference cDNA of each exitron-containing gene in *A. thaliana* and performing BLAST search ([Altschul et al. 1990](#_ENREF_1)) against the cDNA collections of the following plant species: dicots *Arabidopsis lyrata, Brassica napa, Populus trichocarpa,* and *Vitis vinifera,* a monocot *Oryza sativa,* a lycophyte *Selaginella moellendorffii,* a bryophyte *Physcomitrella patens* anda single celled green alga *Chlamydomonas reinhardtii*. Only the hits that were obtained through a bi-directional best-hit approach were kept for further analysis. The protein and gene sequences were obtained for the orthologues.

To test whether an exitron has an intronic or exonic origin we performed protein alignments for each pair of orthologues. An exitron was defined as having a putative exonic origin when the overall protein alignment showed over 50% of identical residues and less than 5% gaps in the alignment region corresponding to the exitron. An exitron was defined as having a putative intronic origin when the overall protein alignment showed over 50% of identical residues between the pair of orthologues but more than 80% of gaps in the alignment region corresponding to the exitron. The orthologues that were not accomplishing these criteria were discarded. For the remaining set of orthologues the gene sequences were obtained and aligned to corresponding exitron-containing genes in *A.thaliana*. Only those orthologues that showed a confident alignment with less than 5% gaps in the alignment region corresponding to an exitron were kept. This resulted in the final set of the exitrons with exonic origin. To finalize the set of exitrons with intronic origin, only those that align to the orthologous regions containing splice sites GT-AG, GC-AG or AT-AC were classified as intronic. We further checked whether these orthologous introns have a coding capacity in the same frame as upstream adjacent exons. The orthologous introns with a coding capacity were classified as “intron (coding)”.

To determine whether exitron splicing occurs in other plant species, we searched for ESTs supporting these events in orthologous genes. Exitrons with intronic origin (see above) were removed from this analysis. The following sets of ESTs were retrieved from The Joint Genome Institute (<http://genome.jgi-psf.org/Araly1>) for *Arabidopsis lyrata* and from Plant GDB (<http://www.plantgdb.org>) for *Brassica rapa, Populus trichocarpa, Vitis vinifera, Oryza sativa, Selaginella moellendorffii, Physcomitrella patens* and *Chlamydomonas reinhardtii*. Spliced alignments were performed against the respective orthologous genes using GeneSeqer ([Usuka et al. 2000](#_ENREF_52)) available at: <http://www.plantgdb.org/cgi-bin/GeneSeqer/index.cgi>. An EST was considered to support the splicing of an exitron in the respective plant species if GeneSeqer described an orthologous region that corresponds to an exitron as an intron.

To estimate the level of exitron splicing conservation, we used only EST collections for *A. thaliana* and *A. lyrata* where the number of ESTs is comparable (1,846,638 and 1,529,262, respectively).

To estimate potential intron loss close to (< 10 bp) or within the exitron sequences, we searched for introns in paralogues and orthologues of different plant species that border or interrupt the regions corresponding to exitrons. For this, intron positions were derived from GeneSeqer ([Usuka et al. 2000](#_ENREF_52)) reports on spliced alignments of orthologous protein sequences to the respective gene sequences. Intron positions for the exitron in AT3G52950 gene encoding CBS/octicosapeptide/Phox/Bemp1 domain-containing protein were additionally analysed and visualized using Malin software ([Csuros 2008](#_ENREF_11)) (<http://www-labs.iro.umontreal.ca/~csuros/introns/malin/>) (Supplemental Fig. 11C). For this, protein sequences of paralogues and orthologues were aligned using ClustalW ([Thompson et al. 1994](#_ENREF_49)) (<http://www.genome.jp/tools/clustalw/>; using slow/accurate alignment setting parameters). The alignment inferred tree was further rooted using the UPGMA method. Intron positions in the protein sequences were obtained using the reference annotation of the respective species. The alignment, the tree and corresponding intron positions were used as inputs for Malin software .

For the analysis of the evolution of the gene encoding the glycine cleavage system T-protein, we additionally retrieved the orthologous gene sequences for *Volvox carteri* and *Homo sapiens.* Alignments of the orthologous genes, cDNAs and proteins were performed using MUSCLE ([Edgar 2004a](#_ENREF_16); [Edgar 2004b](#_ENREF_17)) available at <http://www.ebi.ac.uk/Tools/msa/muscle/>. To determine the gene structures (exons and intron borders) in different species, the respective cDNAs and proteins were aligned to the corresponding genes using GeneSeqer ([Usuka et al. 2000](#_ENREF_52)). Phylogenetic tree reconstruction was obtained for the CDS sequences aligned with MUSCLE using the PhyML software ([Guindon et al. 2010](#_ENREF_24)) (substitution model: GTR+G, 1000 bootstraps, available at: <http://www.atgc-montpellier.fr/phyml/>). Putative binding sites for splicing factors were predicted using SpliceAid 2 ([Piva et al. 2012](#_ENREF_39)).

Evidence of intron loss in human exitron-containing genes was obtained for the highly conserved gene coding for HSPA1A. The presence and positions of introns in orthologous genes were derived from Ensembl using the Comparative genomics gene tree tool. Spliced alignments of retrieved orthologous gene and protein sequences potentially containing introns at positions corresponding to *HSPA1A* exitron borders were verified using GeneSeqer. Intron positions were mapped onto protein alignments of human HSPA1A, *Ciona instestinalis* and *Ciona savignyi* orthologues.

**SUPPLEMENTAL REFERENCES**

Altschul SF, Gish W, Miller W, Myers EW, Lipman DJ. 1990. Basic local alignment search tool. *J Mol Biol* **215**(3): 403-410.

Arciga-Reyes L, Wootton L, Kieffer M, Davies B. 2006. UPF1 is required for nonsense-mediated mRNA decay (NMD) and RNAi in Arabidopsis. *Plant J* **47**(3): 480-489.

Baerenfaller K, Grossmann J, Grobei MA, Hull R, Hirsch-Hoffmann M, Yalovsky S, Zimmermann P, Grossniklaus U, Gruissem W, Baginsky S. 2008. Genome-scale proteomics reveals Arabidopsis thaliana gene models and proteome dynamics. *Science* **320**(5878): 938-941.

Bailey TL, Boden M, Buske FA, Frith M, Grant CE, Clementi L, Ren J, Li WW, Noble WS. 2009. MEME SUITE: tools for motif discovery and searching. *Nucleic Acids Res* **37**(Web Server issue): W202-208.

Barbosa-Morais NL, Irimia M, Pan Q, Xiong HY, Gueroussov S, Lee LJ, Slobodeniuc V, Kutter C, Watt S, Colak R et al. 2012. The evolutionary landscape of alternative splicing in vertebrate species. *Science* **338**(6114): 1587-1593.

Bernsel A, Viklund H, Falk J, Lindahl E, von Heijne G, Elofsson A. 2008. Prediction of membrane-protein topology from first principles. *Proc Natl Acad Sci U S A* **105**(20): 7177-7181.

Bolle C, Huep G, Kleinbolting N, Haberer G, Mayer K, Leister D, Weisshaar B. 2013. GABI-DUPLO: a collection of double mutants to overcome genetic redundancy in Arabidopsis thaliana. *Plant J* **75**(1): 157-171.

Brosch M, Saunders GI, Frankish A, Collins MO, Yu L, Wright J, Verstraten R, Adams DJ, Harrow J, Choudhary JS et al. 2011. Shotgun proteomics aids discovery of novel protein-coding genes, alternative splicing, and "resurrected" pseudogenes in the mouse genome. *Genome Res* **21**(5): 756-767.

Cao J, Schneeberger K, Ossowski S, Gunther T, Bender S, Fitz J, Koenig D, Lanz C, Stegle O, Lippert C et al. 2011. Whole-genome sequencing of multiple Arabidopsis thaliana populations. *Nat Genet* **43**(10): 956-963.

Castellana NE, Payne SH, Shen Z, Stanke M, Bafna V, Briggs SP. 2008. Discovery and revision of Arabidopsis genes by proteogenomics. *Proc Natl Acad Sci U S A* **105**(52): 21034-21038.

Csuros M. 2008. Malin: maximum likelihood analysis of intron evolution in eukaryotes. *Bioinformatics* **24**(13): 1538-1539.

Dosztanyi Z, Csizmok V, Tompa P, Simon I. 2005. IUPred: web server for the prediction of intrinsically unstructured regions of proteins based on estimated energy content. *Bioinformatics* **21**(16): 3433-3434.

Dosztanyi Z, Meszaros B, Simon I. 2009. ANCHOR: web server for predicting protein binding regions in disordered proteins. *Bioinformatics* **25**(20): 2745-2746.

Durek P, Schmidt R, Heazlewood JL, Jones A, MacLean D, Nagel A, Kersten B, Schulze WX. 2010. PhosPhAt: the Arabidopsis thaliana phosphorylation site database. An update. *Nucleic Acids Res* **38**(Database issue): D828-834.

Duvick J, Fu A, Muppirala U, Sabharwal M, Wilkerson MD, Lawrence CJ, Lushbough C, Brendel V. 2008. PlantGDB: a resource for comparative plant genomics. *Nucleic Acids Res* **36**(Database issue): D959-965.

Edgar RC. 2004a. MUSCLE: a multiple sequence alignment method with reduced time and space complexity. *BMC Bioinformatics* **5**: 113.

-. 2004b. MUSCLE: multiple sequence alignment with high accuracy and high throughput. *Nucleic Acids Res* **32**(5): 1792-1797.

Elrouby N, Coupland G. 2010. Proteome-wide screens for small ubiquitin-like modifier (SUMO) substrates identify Arabidopsis proteins implicated in diverse biological processes. *Proc Natl Acad Sci U S A* **107**(40): 17415-17420.

Eswaran J, Horvath A, Godbole S, Reddy SD, Mudvari P, Ohshiro K, Cyanam D, Nair S, Fuqua SA, Polyak K et al. 2013. RNA sequencing of cancer reveals novel splicing alterations. *Scientific reports* **3**: 1689.

Fares A, Rossignol M, Peltier JB. 2011. Proteomics investigation of endogenous S-nitrosylation in Arabidopsis. *Biochem Biophys Res Commun* **416**(3-4): 331-336.

Finkemeier I, Laxa M, Miguet L, Howden AJ, Sweetlove LJ. 2011. Proteins of diverse function and subcellular location are lysine acetylated in Arabidopsis. *Plant Physiol* **155**(4): 1779-1790.

Finn RD, Clements J, Eddy SR. 2011. HMMER web server: interactive sequence similarity searching. *Nucleic Acids Res* **39**(Web Server issue): W29-37.

Flicek P, Ahmed I, Amode MR, Barrell D, Beal K, Brent S, Carvalho-Silva D, Clapham P, Coates G, Fairley S et al. 2013. Ensembl 2013. *Nucleic Acids Res* **41**(Database issue): D48-55.

Guindon S, Dufayard JF, Lefort V, Anisimova M, Hordijk W, Gascuel O. 2010. New algorithms and methods to estimate maximum-likelihood phylogenies: assessing the performance of PhyML 3.0. *Systematic biology* **59**(3): 307-321.

Heazlewood JL, Durek P, Hummel J, Selbig J, Weckwerth W, Walther D, Schulze WX. 2008. PhosPhAt: a database of phosphorylation sites in Arabidopsis thaliana and a plant-specific phosphorylation site predictor. *Nucleic Acids Res* **36**(Database issue): D1015-1021.

Hiller K, Grote A, Scheer M, Munch R, Jahn D. 2004. PrediSi: prediction of signal peptides and their cleavage positions. *Nucleic Acids Res* **32**(Web Server issue): W375-379.

Hori K, Watanabe Y. 2005. UPF3 suppresses aberrant spliced mRNA in Arabidopsis. *Plant J* **43**(4): 530-540.

Hornbeck PV, Zhang B, Murray B, Kornhauser JM, Latham V, Skrzypek E. 2015. PhosphoSitePlus, 2014: mutations, PTMs and recalibrations. *Nucleic Acids Res* **43**(Database issue): D512-520.

Houseley J, Tollervey D. 2010. Apparent non-canonical trans-splicing is generated by reverse transcriptase in vitro. *PLoS ONE* **5**(8): e12271.

Kalyna M, Lopato S, Barta A. 2003. Ectopic expression of atRSZ33 reveals its function in splicing and causes pleiotropic changes in development. *Mol Biol Cell* **14**(9): 3565-3577.

Kalyna M, Simpson CG, Syed NH, Lewandowska D, Marquez Y, Kusenda B, Marshall J, Fuller J, Cardle L, McNicol J et al. 2012. Alternative splicing and nonsense-mediated decay modulate expression of important regulatory genes in Arabidopsis. *Nucleic Acids Res* **40**(6): 2454-2469.

Krogh A, Larsson B, von Heijne G, Sonnhammer EL. 2001. Predicting transmembrane protein topology with a hidden Markov model: application to complete genomes. *J Mol Biol* **305**(3): 567-580.

Lopato S, Kalyna M, Dorner S, Kobayashi R, Krainer AR, Barta A. 1999. atSRp30, one of two SF2/ASF-like proteins from Arabidopsis thaliana, regulates splicing of specific plant genes. *Genes Dev* **13**(8): 987-1001.

Marquez Y, Brown JW, Simpson C, Barta A, Kalyna M. 2012. Transcriptome survey reveals increased complexity of the alternative splicing landscape in Arabidopsis. *Genome Res* **22**(6): 1184-1195.

Obradovic Z, Peng K, Vucetic S, Radivojac P, Dunker AK. 2005. Exploiting heterogeneous sequence properties improves prediction of protein disorder. *Proteins* **61 Suppl 7**: 176-182.

Pan Q, Shai O, Lee LJ, Frey BJ, Blencowe BJ. 2008. Deep surveying of alternative splicing complexity in the human transcriptome by high-throughput sequencing. *Nat Genet* **40**(12): 1413-1415.

Peng K, Radivojac P, Vucetic S, Dunker AK, Obradovic Z. 2006. Length-dependent prediction of protein intrinsic disorder. *BMC Bioinformatics* **7**: 208.

Petrillo E, Godoy Herz MA, Fuchs A, Reifer D, Fuller J, Yanovsky MJ, Simpson C, Brown JW, Barta A, Kalyna M et al. 2014. A chloroplast retrograde signal regulates nuclear alternative splicing. *Science* **344**(6182): 427-430.

Piva F, Giulietti M, Burini AB, Principato G. 2012. SpliceAid 2: a database of human splicing factors expression data and RNA target motifs. *Hum Mutat* **33**(1): 81-85.

Provart NJ, Gil P, Chen W, Han B, Chang HS, Wang X, Zhu T. 2003. Gene expression phenotypes of Arabidopsis associated with sensitivity to low temperatures. *Plant Physiol* **132**(2): 893-906.

Reddy AS, Marquez Y, Kalyna M, Barta A. 2013. Complexity of the alternative splicing landscape in plants. *Plant Cell* **25**(10): 3657-3683.

Saracco SA, Hansson M, Scalf M, Walker JM, Smith LM, Vierstra RD. 2009. Tandem affinity purification and mass spectrometric analysis of ubiquitylated proteins in Arabidopsis. *Plant J* **59**(2): 344-358.

Sheth N, Roca X, Hastings ML, Roeder T, Krainer AR, Sachidanandam R. 2006. Comprehensive splice-site analysis using comparative genomics. *Nucleic Acids Res* **34**(14): 3955-3967.

Simpson CG, Fuller J, Maronova M, Kalyna M, Davidson D, McNicol J, Barta A, Brown JW. 2008a. Monitoring changes in alternative precursor messenger RNA splicing in multiple gene transcripts. *Plant J* **53**(6): 1035-1048.

Simpson CG, Lewandowska D, Fuller J, Maronova M, Kalyna M, Davidson D, McNicol J, Raczynska D, Jarmolowski A, Barta A et al. 2008b. Alternative splicing in plants. *Biochem Soc Trans* **36**(Pt 3): 508-510.

Staiger D, Brown JW. 2013. Alternative Splicing at the Intersection of Biological Timing, Development, and Stress Responses. *Plant Cell*.

Sugliani M, Brambilla V, Clerkx EJ, Koornneef M, Soppe WJ. 2010. The conserved splicing factor SUA controls alternative splicing of the developmental regulator ABI3 in Arabidopsis. *Plant Cell* **22**(6): 1936-1946.

Tanner S, Shen Z, Ng J, Florea L, Guigo R, Briggs SP, Bafna V. 2007. Improving gene annotation using peptide mass spectrometry. *Genome Res* **17**(2): 231-239.

Thompson JD, Higgins DG, Gibson TJ. 1994. CLUSTAL W: improving the sensitivity of progressive multiple sequence alignment through sequence weighting, position-specific gap penalties and weight matrix choice. *Nucleic Acids Res* **22**(22): 4673-4680.

Trapnell C, Pachter L, Salzberg SL. 2009. TopHat: discovering splice junctions with RNA-Seq. *Bioinformatics* **25**(9): 1105-1111.

Tress ML, Bodenmiller B, Aebersold R, Valencia A. 2008. Proteomics studies confirm the presence of alternative protein isoforms on a large scale. *Genome Biol* **9**(11): R162.

Usuka J, Zhu W, Brendel V. 2000. Optimal spliced alignment of homologous cDNA to a genomic DNA template. *Bioinformatics* **16**(3): 203-211.

Valvekens D, Van Montague M, Van Lijsebettens M. 1988. Agrobacterium tumefaciens-mediated transformation of Arabidopsis thaliana root explants using kanamycin selection. *Proc Natl Acad Sci USA* **85**: 5536-5540.

Wang ET, Sandberg R, Luo S, Khrebtukova I, Zhang L, Mayr C, Kingsmore SF, Schroth GP, Burge CB. 2008. Alternative isoform regulation in human tissue transcriptomes. *Nature* **456**(7221): 470-476.

Wang X, Li X, Meisenhelder J, Hunter T, Yoshida S, Asami T, Chory J. 2005. Autoregulation and homodimerization are involved in the activation of the plant steroid receptor BRI1. *Dev Cell* **8**(6): 855-865.

Wilhelm M, Schlegl J, Hahne H, Moghaddas Gholami A, Lieberenz M, Savitski MM, Ziegler E, Butzmann L, Gessulat S, Marx H et al. 2014. Mass-spectrometry-based draft of the human proteome. *Nature* **509**(7502): 582-587.

Zheng Q, Wang XJ. 2008. GOEAST: a web-based software toolkit for Gene Ontology enrichment analysis. *Nucleic Acids Res* **36**(Web Server issue): W358-363.

Zhong XY, Wang P, Han J, Rosenfeld MG, Fu XD. 2009. SR proteins in vertical integration of gene expression from transcription to RNA processing to translation. *Mol Cell* **35**(1): 1-10.

Zhou H, Zhou Y. 2003. Predicting the topology of transmembrane helical proteins using mean burial propensity and a hidden-Markov-model-based method. *Protein science : a publication of the Protein Society* **12**(7): 1547-1555.

Zulawski M, Braginets R, Schulze WX. 2013. PhosPhAt goes kinases--searchable protein kinase target information in the plant phosphorylation site database PhosPhAt. *Nucleic Acids Res* **41**(Database issue): D1176-1184.
