# Supplementary material for: Unmasking alternative splicing inside protein-coding exons defines exitrons and their role in proteome plasticity
Source: HighWire-hosted journal article supplement (doi:10.1101/gr.186585.114), 2015-05-01
Supplement: Supplemental_Tables.xlsx [file Supplemental_Tables.xlsx]

## Sheet: ST1
Supplemental Table 1. Exitrons (EI) detected in Arabidopsis thaliana by RNA-Seq
Gene ID	Chromosome	EI coordinates	EI length (nt)	EI length is x3	# introns in gene	# introns in CDS	Gene Alias/Annotation
AT1G01120	Chr 1	58705-58814	108	yes	0	0	KCS1__3-ketoacyl-CoA synthase 1
AT1G01340	Chr 1	132893-133018	124	no	8	7	ACBK1_ATCNGC10_CNGC10__cyclic nucleotide gated channel 10
AT1G01500	Chr 1	185406-185768	361	no	1	1	Erythronate-4-phosphate dehydrogenase family protein
AT1G01830	Chr 1	299219-299304	84	yes	4	0	ARM repeat superfamily protein
AT1G02000	Chr 1	346657-346858	200	no	0	0	GAE2__UDP-D-glucuronate 4-epimerase 2 GAE2__UDP-D-glucuronate 4-epimerase 2
AT1G02000	Chr 1	346718-346858	139	no	0	0	GAE2__UDP-D-glucuronate 4-epimerase 2 GAE2__UDP-D-glucuronate 4-epimerase 2
AT1G02160	Chr 1	411253-411336	82	no	2	2	Cox19 family protein (CHCH motif)
AT1G02290	Chr 1	451023-451753	729	yes	1	0	unknown protein; BEST Arabidopsis thaliana protein match is: unknown protein (TAIR:AT3G45830.1); Has 134 Blast hits to 134 proteins in 37 species: Archae - 0; Bacteria - 0; Metazoa - 54; Fungi - 0; Plants - 78; Viruses - 0; Other Eukaryotes - 2 (source: NCBI BLink).
AT1G02630	Chr 1	561320-561453	132	yes	2	2	Nucleoside transporter family protein
AT1G02850	Chr 1	631858-632009	150	yes	12	12	BGLU11__beta glucosidase 11
AT1G03000	Chr 1	691756-691899	142	no	12	12	PEX6__peroxin 6
AT1G03040	Chr 1	706315-706433	117	yes	5	5	basic helix-loop-helix (bHLH) DNA-binding superfamily protein
AT1G03220	Chr 1	787419-787862	442	no	0	0	Eukaryotic aspartyl protease family protein
AT1G03350	Chr 1	823581-824012	430	no	0	0	BSD domain-containing protein
AT1G03830	Chr 1	962649-962746	96	yes	11	11	guanylate-binding family protein
AT1G04300	Chr 1	1152947-1153036	88	no	12	11	TRAF-like superfamily protein
AT1G04945	Chr 1	1402520-1402596	75	yes	9	7	HIT-type Zinc finger family protein HIT-type Zinc finger family protein
AT1G04945	Chr 1	1402520-1402623	102	yes	9	7	HIT-type Zinc finger family protein HIT-type Zinc finger family protein
AT1G05540	Chr 1	1639823-1639921	97	no	2	2	Protein of unknown function (DUF295)
AT1G05710	Chr 1	1716624-1716691	66	yes	5	4	basic helix-loop-helix (bHLH) DNA-binding superfamily protein
AT1G06000	Chr 1	1820887-1820954	66	yes	0	0	UDP-Glycosyltransferase superfamily protein
AT1G06190	Chr 1	1892919-1893434	514	no	2	2	Rho termination factor
AT1G06580	Chr 1	2014969-2015095	125	no	0	0	Pentatricopeptide repeat (PPR) superfamily protein
AT1G06850	Chr 1	2106246-2106354	107	no	4	4	AtbZIP52_bZIP52__basic leucine-zipper 52
AT1G07135	Chr 1	2190359-2190426	66	yes	0	0	glycine-rich protein
AT1G07240	Chr 1	2224305-2224824	518	no	0	0	UGT71C5__UDP-glucosyl transferase 71C5
AT1G07520	Chr 1	2310406-2311355	948	yes	0	0	GRAS family transcription factor
AT1G07590	Chr 1	2337074-2337483	408	yes	2	1	Tetratricopeptide repeat (TPR)-like superfamily protein
AT1G07615	Chr 1	2342647-2343094	446	no	4	4	GTP-binding protein Obg/CgtA
AT1G07930	Chr 1	2459205-2459386	180	yes	3	2	GTP binding Elongation factor Tu family protein
AT1G07940	Chr 1	2464420-2464658	237	yes	2	1	GTP binding Elongation factor Tu family protein
AT1G08070	Chr 1	2516314-2516395	80	no	0	0	EMB3102_OTP82__Tetratricopeptide repeat (TPR)-like superfamily protein
AT1G08550	Chr 1	2708417-2708637	219	yes	5	4	AVDE1_NPQ1__non-photochemical quenching 1
AT1G08570	Chr 1	2713142-2713236	93	yes	5	4	ACHT4__atypical CYS HIS rich thioredoxin 4
AT1G09070	Chr 1	2928355-2928419	63	yes	0	0	(AT)SRC2_SRC2__soybean gene regulated by cold-2 (AT)SRC2_SRC2__soybean gene regulated by cold-2 (AT)SRC2_SRC2__soybean gene regulated by cold-2
AT1G09070	Chr 1	2928381-2928562	180	yes	0	0	(AT)SRC2_SRC2__soybean gene regulated by cold-2 (AT)SRC2_SRC2__soybean gene regulated by cold-2 (AT)SRC2_SRC2__soybean gene regulated by cold-2
AT1G09070	Chr 1	2928406-2928524	117	yes	0	0	(AT)SRC2_SRC2__soybean gene regulated by cold-2 (AT)SRC2_SRC2__soybean gene regulated by cold-2 (AT)SRC2_SRC2__soybean gene regulated by cold-2
AT1G09470	Chr 1	3055890-3055977	86	no	5	4	unknown protein; FUNCTIONS IN: molecular_function unknown; BEST Arabidopsis thaliana protein match is: unknown protein (TAIR:AT5G26770.1).
AT1G09650	Chr 1	3126600-3126768	167	no	0	0	F-box and associated interaction domains-containing protein
AT1G10330	Chr 1	3389773-3389862	88	no	0	0	Tetratricopeptide repeat (TPR)-like superfamily protein
AT1G10410	Chr 1	3417530-3417618	87	yes	8	8	Protein of unknown function (DUF1336)
AT1G10990	Chr 1	3670901-3670980	78	yes	1	1	unknown protein; Has 6 Blast hits to 6 proteins in 2 species: Archae - 0; Bacteria - 0; Metazoa - 0; Fungi - 0; Plants - 6; Viruses - 0; Other Eukaryotes - 0 (source: NCBI BLink).
AT1G11300	Chr 1	3800444-3800529	84	yes	13	13	protein serine/threonine kinases;protein kinases;ATP binding;sugar binding;kinases;carbohydrate binding
AT1G11410	Chr 1	3841455-3841704	248	no	5	5	S-locus lectin protein kinase family protein
AT1G11680	Chr 1	3939753-3939931	177	yes	2	1	CYP51_CYP51A2_CYP51G1_EMB1738__CYTOCHROME P450 51G1
AT1G11700	Chr 1	3945861-3946174	312	yes	0	0	Protein of unknown function, DUF584
AT1G11770	Chr 1	3976467-3976529	61	no	0	0	FAD-binding Berberine family protein
AT1G11800	Chr 1	3986855-3986920	64	no	3	3	endonuclease/exonuclease/phosphatase family protein
AT1G11850	Chr 1	3999360-3999535	174	yes	1	1	unknown protein; FUNCTIONS IN: molecular_function unknown; INVOLVED IN: biological_process unknown; LOCATED IN: endomembrane system; EXPRESSED IN: 19 plant structures; EXPRESSED DURING: 12 growth stages; Has 52145 Blast hits to 9983 proteins in 837 species: Archae - 70; Bacteria - 23777; Metazoa - 15204; Fungi - 1872; Plants - 6370; Viruses - 647; Other Eukaryotes - 4205 (source: NCBI BLink).
AT1G11860	Chr 1	4002080-4002213	132	yes	3	2	Glycine cleavage T-protein family
AT1G11890	Chr 1	4011511-4011645	133	no	5	4	ATSEC22_SEC22__Synaptobrevin family protein
AT1G12220	Chr 1	4145703-4145875	171	yes	1	0	RPS5__Disease resistance protein (CC-NBS-LRR class) family
AT1G12260	Chr 1	4163369-4163529	159	yes	3	2	ANAC007_EMB2749_NAC007_VND4__NAC 007
AT1G12580	Chr 1	4284400-4284493	92	no	4	3	PEPKR1__phosphoenolpyruvate carboxylase-related kinase 1
AT1G12780	Chr 1	4356821-4356910	88	no	7	7	ATUGE1_UGE1__UDP-D-glucose/UDP-D-galactose 4-epimerase 1
AT1G13090	Chr 1	4462267-4462520	252	yes	1	1	CYP71B28__cytochrome P450, family 71, subfamily B, polypeptide 28
AT1G13630	Chr 1	4670616-4670820	203	no	3	3	Tetratricopeptide repeat (TPR)-like superfamily protein
AT1G14170	Chr 1	4845150-4845226	75	yes	6	5	RNA-binding KH domain-containing protein
AT1G14230	Chr 1	4863121-4863190	68	no	7	7	GDA1/CD39 nucleoside phosphatase family protein
AT1G14560	Chr 1	4981841-4981931	89	no	6	6	Mitochondrial substrate carrier family protein
AT1G14640	Chr 1	5024040-5024109	68	no	1	1	SWAP (Suppressor-of-White-APricot)/surp domain-containing protein
AT1G14650	Chr 1	5028190-5029075	884	no	4	1	SWAP (Suppressor-of-White-APricot)/surp domain-containing protein / ubiquitin family protein
AT1G14900	Chr 1	5138739-5138953	213	yes	1	1	HMGA__high mobility group A
AT1G15060	Chr 1	5185886-5186124	237	yes	8	8	Uncharacterised conserved protein UCP031088, alpha/beta hydrolase
AT1G15080	Chr 1	5188138-5188266	127	no	7	6	ATLPP2_ATPAP2_LPP2__lipid phosphate phosphatase 2
AT1G15290	Chr 1	5258137-5258208	70	no	20	19	Tetratricopeptide repeat (TPR)-like superfamily protein
AT1G15440	Chr 1	5308843-5309148	304	no	7	7	ATPWP2_PWP2__periodic tryptophan protein 2
AT1G15510	Chr 1	5329660-5331576	1915	no	0	0	ATECB2_ECB2_VAC1__Tetratricopeptide repeat (TPR)-like superfamily protein
AT1G16110	Chr 1	5519730-5519849	118	no	2	2	WAKL6__wall associated kinase-like 6 WAKL6__wall associated kinase-like 6
AT1G16110	Chr 1	5520319-5520401	81	yes	2	2	WAKL6__wall associated kinase-like 6 WAKL6__wall associated kinase-like 6
AT1G16370	Chr 1	5596839-5597591	751	no	0	0	ATOCT6_OCT6__organic cation/carnitine transporter 6
AT1G16390	Chr 1	5603929-5604063	133	no	0	0	ATOCT3_OCT3__organic cation/carnitine transporter 3
AT1G16540	Chr 1	5660557-5660645	87	yes	20	20	ABA3_ACI2_ATABA3_LOS5_SIR3__molybdenum cofactor sulfurase (LOS5) (ABA3)
AT1G16970	Chr 1	5803689-5803754	64	no	17	17	ATKU70__KU70 homolog
AT1G17050	Chr 1	5829374-5829452	77	no	5	5	SPS2__solanesyl diphosphate synthase 2
AT1G17230	Chr 1	5891513-5894131	2617	no	2	2	Leucine-rich receptor-like protein kinase family protein
AT1G18000	Chr 1	6195462-6195574	111	yes	0	0	Major facilitator superfamily protein
AT1G18550	Chr 1	6382660-6382722	61	no	5	5	ATP binding microtubule motor family protein
AT1G18670	Chr 1	6429941-6430024	82	no	8	8	IBS1__Protein kinase superfamily protein
AT1G18900	Chr 1	6530002-6531273	1270	no	2	1	Pentatricopeptide repeat (PPR) superfamily protein Pentatricopeptide repeat (PPR) superfamily protein
AT1G18900	Chr 1	6530102-6531295	1192	no	2	1	Pentatricopeptide repeat (PPR) superfamily protein Pentatricopeptide repeat (PPR) superfamily protein
AT1G19000	Chr 1	6562474-6562619	144	yes	3	2	Homeodomain-like superfamily protein
AT1G19700	Chr 1	6810759-6810960	200	no	4	3	BEL10_BLH10__BEL1-like homeodomain 10
AT1G19750	Chr 1	6827406-6827531	124	no	8	8	Transducin/WD40 repeat-like superfamily protein
AT1G20020	Chr 1	6943264-6943386	121	no	8	8	ATLFNR2_FNR2__ferredoxin-NADP(+)-oxidoreductase 2
AT1G20180	Chr 1	6997265-6997359	93	yes	2	2	Protein of unknown function (DUF677)
AT1G20300	Chr 1	7030189-7030501	311	no	0	0	Pentatricopeptide repeat (PPR) superfamily protein
AT1G20410	Chr 1	7081968-7082067	98	no	14	14	Pseudouridine synthase family protein
AT1G20510	Chr 1	7104851-7104954	102	yes	3	3	OPCL1__OPC-8:0 CoA ligase1 OPCL1__OPC-8:0 CoA ligase1
AT1G20510	Chr 1	7104893-7104954	60	yes	3	3	OPCL1__OPC-8:0 CoA ligase1 OPCL1__OPC-8:0 CoA ligase1
AT1G21460	Chr 1	7512553-7512653	99	yes	5	5	AtSWEET1_SWEET1__Nodulin MtN3 family protein
AT1G21500	Chr 1	7530163-7530254	90	yes	1	1	unknown protein; Has 29 Blast hits to 29 proteins in 12 species: Archae - 0; Bacteria - 0; Metazoa - 0; Fungi - 2; Plants - 27; Viruses - 0; Other Eukaryotes - 0 (source: NCBI BLink).
AT1G21670	Chr 1	7610795-7611641	845	no	0	0	LOCATED IN: cell wall, plant-type cell wall; EXPRESSED IN: 23 plant structures; EXPRESSED DURING: 14 growth stages; CONTAINS InterPro DOMAIN/s: WD40-like Beta Propeller (InterPro:IPR011659), Six-bladed beta-propeller, TolB-like (InterPro:IPR011042); BEST Arabidopsis thaliana protein match is: DPP6 N-terminal domain-like protein (TAIR:AT1G21680.1); Has 8461 Blast hits to 5060 proteins in 1257 spec…
AT1G21920	Chr 1	7705039-7705119	79	no	2	2	Histone H3 K4-specific methyltransferase SET7/9 family protein Histone H3 K4-specific methyltransferase SET7/9 family protein
AT1G21920	Chr 1	7705526-7705642	115	no	2	2	Histone H3 K4-specific methyltransferase SET7/9 family protein Histone H3 K4-specific methyltransferase SET7/9 family protein
AT1G22310	Chr 1	7883125-7883197	71	no	2	2	ATMBD8_MBD8__methyl-CPG-binding domain 8
AT1G22430	Chr 1	7919749-7919832	82	no	8	8	GroES-like zinc-binding dehydrogenase family protein
AT1G22450	Chr 1	7926046-7926185	138	yes	4	4	ATCOX6B2_COX6B__cytochrome C oxidase 6B
AT1G22530	Chr 1	7957759-7958126	366	yes	3	3	PATL2__PATELLIN 2
AT1G22790	Chr 1	8070426-8070559	132	yes	2	1	unknown protein; FUNCTIONS IN: molecular_function unknown; INVOLVED IN: biological_process unknown; LOCATED IN: plasma membrane; EXPRESSED IN: 22 plant structures; EXPRESSED DURING: 13 growth stages; BEST Arabidopsis thaliana protein match is: unknown protein (TAIR:AT1G34010.1); Has 35333 Blast hits to 34131 proteins in 2444 species: Archae - 798; Bacteria - 22429; Metazoa - 974; Fungi - 991; Pla…
AT1G23130	Chr 1	8200478-8200590	111	yes	1	1	Polyketide cyclase/dehydrase and lipid transport superfamily protein
AT1G23740	Chr 1	8398954-8399051	96	yes	3	3	AOR__Oxidoreductase, zinc-binding dehydrogenase family protein
AT1G26260	Chr 1	9087391-9087458	66	yes	9	8	CIB5__cryptochrome-interacting basic-helix-loop-helix 5
AT1G26270	Chr 1	9090055-9091708	1652	no	1	0	Phosphatidylinositol 3- and 4-kinase family protein Phosphatidylinositol 3- and 4-kinase family protein
AT1G26270	Chr 1	9090606-9091622	1015	no	1	0	Phosphatidylinositol 3- and 4-kinase family protein Phosphatidylinositol 3- and 4-kinase family protein
AT1G26440	Chr 1	9145195-9145301	105	yes	6	5	ATUPS5_UPS5_UPS5__ureide permease 5
AT1G27840	Chr 1	9695767-9695892	124	no	8	8	ATCSA-1__Transducin/WD40 repeat-like superfamily protein
AT1G28430	Chr 1	9993511-9993596	84	yes	1	1	CYP705A24__cytochrome P450, family 705, subfamily A, polypeptide 24
AT1G28440	Chr 1	9997222-9997631	408	yes	1	1	HSL1__HAESA-like 1
AT1G28610	Chr 1	10054510-10054615	104	no	4	4	GDSL-like Lipase/Acylhydrolase superfamily protein
AT1G29400	Chr 1	10293160-10293242	81	yes	11	10	AML5_ML5__MEI2-like protein 5
AT1G29900	Chr 1	10468440-10469045	604	no	2	2	CARB_VEN3__carbamoyl phosphate synthetase B
AT1G30000	Chr 1	10511207-10511590	382	no	5	5	MNS3__alpha-mannosidase 3
AT1G30130	Chr 1	10587810-10587895	84	yes	5	4	unknown protein; FUNCTIONS IN: molecular_function unknown; INVOLVED IN: biological_process unknown; LOCATED IN: endomembrane system; EXPRESSED IN: 23 plant structures; EXPRESSED DURING: 13 growth stages; CONTAINS InterPro DOMAIN/s: Protein of unknown function DUF1365 (InterPro:IPR010775); Has 35333 Blast hits to 34131 proteins in 2444 species: Archae - 798; Bacteria - 22429; Metazoa - 974; Fungi …
AT1G30360	Chr 1	10718511-10718611	99	yes	5	5	ERD4__Early-responsive to dehydration stress protein (ERD4)
AT1G31860	Chr 1	11435001-11435078	76	no	4	4	AT-IE_HISN2__histidine biosynthesis bifunctional protein (HISIE)
AT1G32340	Chr 1	11664378-11664442	63	yes	6	6	NHL8__NDR1/HIN1-like 8
AT1G32360	Chr 1	11673853-11674113	259	no	1	1	Zinc finger (CCCH-type) family protein
AT1G32640	Chr 1	11799339-11800740	1400	no	0	0	ATMYC2_JAI1_JIN1_MYC2_RD22BP1_ZBF1__Basic helix-loop-helix (bHLH) DNA-binding family protein
AT1G32810	Chr 1	11882866-11882944	77	no	6	6	RING/FYVE/PHD zinc finger superfamily protein
AT1G33400	Chr 1	12107903-12108033	129	yes	13	13	TPR9__Tetratricopeptide repeat (TPR)-like superfamily protein
AT1G33475	Chr 1	12147586-12147665	78	yes	0	0	SNARE-like superfamily protein SNARE-like superfamily protein
AT1G33475	Chr 1	12147721-12148028	306	yes	0	0	SNARE-like superfamily protein SNARE-like superfamily protein
AT1G34160	Chr 1	12441574-12441681	106	no	1	1	Tetratricopeptide repeat (TPR)-like superfamily protein
AT1G34200	Chr 1	12456723-12456805	81	yes	1	1	Glyceraldehyde-3-phosphate dehydrogenase-like family protein
AT1G34300	Chr 1	12503912-12504361	448	no	0	0	lectin protein kinase family protein
AT1G34370	Chr 1	12551419-12551536	116	no	2	1	STOP1__C2H2 and C2HC zinc fingers superfamily protein
AT1G35160	Chr 1	12867585-12867660	74	no	3	3	14-3-3PHI_GF14 PHI_GRF4__GF14 protein phi chain
AT1G35670	Chr 1	13205813-13205943	129	yes	6	6	ATCDPK2_ATCPK11_CDPK2_CPK11__calcium-dependent protein kinase 2
AT1G35710	Chr 1	13223082-13223743	660	yes	1	1	Protein kinase family protein with leucine-rich repeat domain
AT1G43710	Chr 1	16487784-16487878	93	yes	4	4	emb1075__Pyridoxal phosphate (PLP)-dependent transferases superfamily protein
AT1G43980	Chr 1	16688648-16688743	94	no	0	0	Tetratricopeptide repeat (TPR)-like superfamily protein
AT1G44100	Chr 1	16765564-16765705	140	no	4	4	AAP5__amino acid permease 5
AT1G47250	Chr 1	17320802-17320869	66	yes	1	1	PAF2__20S proteasome alpha subunit F2
AT1G47490	Chr 1	17424846-17424929	82	no	5	5	ATRBP47C_RBP47C__RNA-binding protein 47C
AT1G47900	Chr 1	17649161-17649807	645	yes	5	4	Plant protein of unknown function (DUF869)
AT1G48030	Chr 1	17717482-17718581	1098	yes	2	1	mtLPD1__mitochondrial lipoamide dehydrogenase 1
AT1G48230	Chr 1	17807407-17807477	69	yes	9	8	nodulin MtN21 /EamA-like transporter family protein
AT1G49160	Chr 1	18180369-18180468	98	no	6	5	WNK7__Protein kinase superfamily protein
AT1G49480	Chr 1	18315271-18315337	65	no	3	2	RTV1__related to vernalization1 1
AT1G49870	Chr 1	18461666-18461946	279	yes	4	4	unknown protein; EXPRESSED IN: 10 plant structures; EXPRESSED DURING: F mature embryo stage, petal differentiation and expansion stage, E expanded cotyledon stage, D bilateral stage; Has 30201 Blast hits to 17322 proteins in 780 species: Archae - 12; Bacteria - 1396; Metazoa - 17338; Fungi - 3422; Plants - 5037; Viruses - 0; Other Eukaryotes - 2996 (source: NCBI BLink).
AT1G50250	Chr 1	18615940-18616195	254	no	4	4	FTSH1__FTSH protease 1
AT1G50620	Chr 1	18750346-18750782	435	yes	3	3	RING/FYVE/PHD zinc finger superfamily protein
AT1G50820	Chr 1	18834004-18834100	95	no	0	0	Aminotransferase-like, plant mobile domain family protein
AT1G50920	Chr 1	18870695-18872380	1684	no	2	0	Nucleolar GTP-binding protein Nucleolar GTP-binding protein
AT1G50920	Chr 1	18870962-18871899	936	yes	2	0	Nucleolar GTP-binding protein Nucleolar GTP-binding protein
AT1G51570	Chr 1	19122688-19124597	1908	yes	0	0	Calcium-dependent lipid-binding (CaLB domain) plant phosphoribosyltransferase family protein Calcium-dependent lipid-binding (CaLB domain) plant phosphoribosyltransferase family protein
AT1G51570	Chr 1	19122696-19124628	1931	no	0	0	Calcium-dependent lipid-binding (CaLB domain) plant phosphoribosyltransferase family protein Calcium-dependent lipid-binding (CaLB domain) plant phosphoribosyltransferase family protein
AT1G51850	Chr 1	19254174-19254276	101	no	13	13	Leucine-rich repeat protein kinase family protein Leucine-rich repeat protein kinase family protein
AT1G51850	Chr 1	19255724-19255822	97	no	13	13	Leucine-rich repeat protein kinase family protein Leucine-rich repeat protein kinase family protein
AT1G52290	Chr 1	19471769-19471865	95	no	7	7	AtPERK15_PERK15__Protein kinase superfamily protein
AT1G53250	Chr 1	19857843-19857948	104	no	5	5	unknown protein; BEST Arabidopsis thaliana protein match is: unknown protein (TAIR:AT1G53800.1); Has 11909 Blast hits to 7704 proteins in 757 species: Archae - 51; Bacteria - 1338; Metazoa - 4550; Fungi - 987; Plants - 464; Viruses - 24; Other Eukaryotes - 4495 (source: NCBI BLink).
AT1G53340	Chr 1	19899484-19900619	1134	yes	0	0	Cysteine/Histidine-rich C1 domain family protein
AT1G53350	Chr 1	19904180-19904280	99	yes	4	4	Disease resistance protein (CC-NBS-LRR class) family
AT1G53645	Chr 1	20027677-20027772	94	no	3	3	hydroxyproline-rich glycoprotein family protein
AT1G53790	Chr 1	20080346-20080458	111	yes	4	3	F-box and associated interaction domains-containing protein
AT1G53830	Chr 1	20099540-20099702	161	no	2	2	ATPME2_PME2__pectin methylesterase 2
AT1G54270	Chr 1	20260935-20261017	81	yes	4	3	EIF4A-2__eif4a-2
AT1G54390	Chr 1	20305171-20305255	83	no	7	7	ING2__PHD finger protein-related ING2__PHD finger protein-related
AT1G54390	Chr 1	20305458-20305555	96	yes	7	7	ING2__PHD finger protein-related ING2__PHD finger protein-related
AT1G55280	Chr 1	20624013-20624117	103	no	2	2	Lipase/lipooxygenase, PLAT/LH2 family protein
AT1G55530	Chr 1	20730001-20730101	99	yes	1	0	RING/U-box superfamily protein RING/U-box superfamily protein
AT1G55530	Chr 1	20730429-20730490	60	yes	1	0	RING/U-box superfamily protein RING/U-box superfamily protein
AT1G56070	Chr 1	20968472-20970216	1743	yes	3	2	LOS1__Ribosomal protein S5/Elongation factor G/III/V family protein LOS1__Ribosomal protein S5/Elongation factor G/III/V family protein LOS1__Ribosomal protein S5/Elongation factor G/III/V family protein LOS1__Ribosomal protein S5/Elongation factor G/III/V family protein
AT1G56070	Chr 1	20968571-20970342	1770	yes	3	2	LOS1__Ribosomal protein S5/Elongation factor G/III/V family protein LOS1__Ribosomal protein S5/Elongation factor G/III/V family protein LOS1__Ribosomal protein S5/Elongation factor G/III/V family protein LOS1__Ribosomal protein S5/Elongation factor G/III/V family protein
AT1G56070	Chr 1	20968976-20970237	1260	yes	3	2	LOS1__Ribosomal protein S5/Elongation factor G/III/V family protein LOS1__Ribosomal protein S5/Elongation factor G/III/V family protein LOS1__Ribosomal protein S5/Elongation factor G/III/V family protein LOS1__Ribosomal protein S5/Elongation factor G/III/V family protein
AT1G56070	Chr 1	20970434-20970660	225	yes	3	2	LOS1__Ribosomal protein S5/Elongation factor G/III/V family protein LOS1__Ribosomal protein S5/Elongation factor G/III/V family protein LOS1__Ribosomal protein S5/Elongation factor G/III/V family protein LOS1__Ribosomal protein S5/Elongation factor G/III/V family protein
AT1G57560	Chr 1	21317407-21317525	117	yes	2	2	AtMYB50_MYB50__myb domain protein 50
AT1G57720	Chr 1	21379170-21379264	93	yes	7	6	Translation elongation factor EF1B, gamma chain Translation elongation factor EF1B, gamma chain
AT1G57720	Chr 1	21379263-21379381	117	yes	7	6	Translation elongation factor EF1B, gamma chain Translation elongation factor EF1B, gamma chain
AT1G57750	Chr 1	21384670-21385022	351	yes	1	1	CYP96A15_MAH1__cytochrome P450, family 96, subfamily A, polypeptide 15
AT1G58100	Chr 1	21512981-21513045	63	yes	1	1	TCP8__TCP family transcription factor
AT1G58180	Chr 1	21538029-21538132	102	yes	11	10	ATBCA6_BCA6__beta carbonic anhydrase 6
AT1G58684	Chr 1	21771092-21771159	66	yes	1	1	Ribosomal protein S5 family protein
AT1G58848	Chr 1	21793538-21793660	121	no	5	2	Disease resistance protein (CC-NBS-LRR class) family
AT1G58983	Chr 1	21807350-21807417	66	yes	1	1	Ribosomal protein S5 family protein
AT1G59218	Chr 1	21829796-21829918	121	no	5	2	Disease resistance protein (CC-NBS-LRR class) family
AT1G59359	Chr 1	21843608-21843675	66	yes	1	1	Ribosomal protein S5 family protein
AT1G60170	Chr 1	22194295-22194376	80	no	7	6	emb1220__pre-mRNA processing ribonucleoprotein binding region-containing protein
AT1G60390	Chr 1	22248388-22249357	968	no	1	1	PG1__polygalacturonase 1
AT1G60560	Chr 1	22309321-22309397	75	yes	5	5	SWIM zinc finger family protein SWIM zinc finger family protein
AT1G60560	Chr 1	22309321-22309401	79	no	5	5	SWIM zinc finger family protein SWIM zinc finger family protein
AT1G60890	Chr 1	22415750-22415958	207	yes	9	8	Phosphatidylinositol-4-phosphate 5-kinase family protein
AT1G61170	Chr 1	22550072-22550161	88	no	0	0	unknown protein; FUNCTIONS IN: molecular_function unknown; INVOLVED IN: N-terminal protein myristoylation; LOCATED IN: cellular_component unknown; EXPRESSED IN: 19 plant structures; EXPRESSED DURING: 12 growth stages; BEST Arabidopsis thaliana protein match is: unknown protein (TAIR:AT1G11125.1); Has 54 Blast hits to 54 proteins in 15 species: Archae - 0; Bacteria - 0; Metazoa - 17; Fungi - 0; Pl…
AT1G61190	Chr 1	22559261-22559337	75	yes	1	1	LRR and NB-ARC domains-containing disease resistance protein
AT1G61640	Chr 1	22747441-22747527	85	no	4	4	Protein kinase superfamily protein
AT1G61730	Chr 1	22794320-22794446	125	no	0	0	DNA-binding storekeeper protein-related transcriptional regulator
AT1G61970	Chr 1	22904790-22904861	70	no	2	0	Mitochondrial transcription termination factor family protein
AT1G62010	Chr 1	22916260-22916396	135	yes	0	0	Mitochondrial transcription termination factor family protein
AT1G62380	Chr 1	23082646-23082752	105	yes	3	3	ACO2_ATACO2__ACC oxidase 2
AT1G62390	Chr 1	23085086-23086237	1150	no	0	0	CLMP1_Phox2__Octicosapeptide/Phox/Bem1p (PB1) domain-containing protein / tetratricopeptide repeat (TPR)-containing protein
AT1G62760	Chr 1	23238099-23238507	407	no	0	0	Plant invertase/pectin methylesterase inhibitor superfamily protein
AT1G62870	Chr 1	23284901-23286193	1291	no	0	0	unknown protein; BEST Arabidopsis thaliana protein match is: unknown protein (TAIR:AT1G12380.1); Has 351 Blast hits to 343 proteins in 42 species: Archae - 2; Bacteria - 0; Metazoa - 27; Fungi - 5; Plants - 299; Viruses - 0; Other Eukaryotes - 18 (source: NCBI BLink).
AT1G62970	Chr 1	23323746-23323830	83	no	0	0	Chaperone DnaJ-domain superfamily protein Chaperone DnaJ-domain superfamily protein
AT1G62970	Chr 1	23324667-23325572	904	no	0	0	Chaperone DnaJ-domain superfamily protein Chaperone DnaJ-domain superfamily protein
AT1G63100	Chr 1	23400868-23400944	75	yes	0	0	GRAS family transcription factor
AT1G63230	Chr 1	23451669-23451757	87	yes	1	1	Tetratricopeptide repeat (TPR)-like superfamily protein
AT1G63630	Chr 1	23587415-23587549	133	no	3	2	Tetratricopeptide repeat (TPR)-like superfamily protein
AT1G63880	Chr 1	23713243-23713333	89	no	3	3	Disease resistance protein (TIR-NBS-LRR class) family
AT1G64190	Chr 1	23826134-23826214	79	no	0	0	6-phosphogluconate dehydrogenase family protein
AT1G64960	Chr 1	24133195-24133317	121	no	4	4	HEB1__ARM repeat superfamily protein
AT1G64970	Chr 1	24134841-24134909	67	no	3	3	G-TMT_TMT1_VTE4__gamma-tocopherol methyltransferase
AT1G65040	Chr 1	24162870-24162952	81	yes	8	7	AtHrd1B_Hrd1B__RING/U-box superfamily protein AtHrd1B_Hrd1B__RING/U-box superfamily protein AtHrd1B_Hrd1B__RING/U-box superfamily protein
AT1G65040	Chr 1	24162882-24162952	69	yes	8	7	AtHrd1B_Hrd1B__RING/U-box superfamily protein AtHrd1B_Hrd1B__RING/U-box superfamily protein AtHrd1B_Hrd1B__RING/U-box superfamily protein
AT1G65040	Chr 1	24163023-24163237	213	yes	8	7	AtHrd1B_Hrd1B__RING/U-box superfamily protein AtHrd1B_Hrd1B__RING/U-box superfamily protein AtHrd1B_Hrd1B__RING/U-box superfamily protein
AT1G65280	Chr 1	24246140-24246233	92	no	11	10	DNAJ heat shock N-terminal domain-containing protein
AT1G66920	Chr 1	24966161-24966240	78	yes	1	1	Protein kinase superfamily protein
AT1G66970	Chr 1	24994814-24995007	192	yes	7	7	GDPDL1_SVL2__SHV3-like 2
AT1G67870	Chr 1	25450718-25450820	101	no	1	1	glycine-rich protein
AT1G68520	Chr 1	25710130-25710731	600	yes	1	1	B-box type zinc finger protein with CCT domain B-box type zinc finger protein with CCT domain
AT1G68520	Chr 1	25710467-25710711	243	yes	1	1	B-box type zinc finger protein with CCT domain B-box type zinc finger protein with CCT domain
AT1G68540	Chr 1	25720830-25720912	81	yes	4	4	CCRL6_TKPR2__NAD(P)-binding Rossmann-fold superfamily protein
AT1G68720	Chr 1	25804929-25807375	2445	yes	3	3	ATTADA_TADA__tRNA arginine adenosine deaminase
AT1G69040	Chr 1	25958959-25959068	108	yes	7	7	ACR4__ACT domain repeat 4 ACR4__ACT domain repeat 4
AT1G69040	Chr 1	25959137-25959210	72	yes	7	7	ACR4__ACT domain repeat 4 ACR4__ACT domain repeat 4
AT1G69250	Chr 1	26034711-26034810	98	no	8	7	Nuclear transport factor 2 (NTF2) family protein with RNA binding (RRM-RBD-RNP motifs) domain
AT1G69450	Chr 1	26108492-26108596	103	no	9	8	Early-responsive to dehydration stress protein (ERD4) Early-responsive to dehydration stress protein (ERD4)
AT1G69450	Chr 1	26109648-26109840	191	no	9	8	Early-responsive to dehydration stress protein (ERD4) Early-responsive to dehydration stress protein (ERD4)
AT1G69500	Chr 1	26125273-26125347	73	no	5	5	CYP704B1__cytochrome P450, family 704, subfamily B, polypeptide 1
AT1G69526	Chr 1	26132046-26132140	93	yes	5	5	S-adenosyl-L-methionine-dependent methyltransferases superfamily protein
AT1G69530	Chr 1	26142917-26143008	90	yes	5	4	AT-EXP1_ATEXP1_ATEXPA1_ATHEXP ALPHA 1.2_EXP1_EXPA1__expansin A1
AT1G69670	Chr 1	26202799-26202886	86	no	1	1	ATCUL3B_CUL3B__cullin 3B
AT1G70100	Chr 1	26403988-26404307	318	yes	7	6	unknown protein; FUNCTIONS IN: molecular_function unknown; INVOLVED IN: biological_process unknown; LOCATED IN: cellular_component unknown; EXPRESSED IN: 22 plant structures; EXPRESSED DURING: 13 growth stages; BEST Arabidopsis thaliana protein match is: unknown protein (TAIR:AT1G24160.2); Has 3305 Blast hits to 2533 proteins in 359 species: Archae - 8; Bacteria - 641; Metazoa - 1288; Fungi - 248…
AT1G70370	Chr 1	26514218-26514327	108	yes	2	1	PG2__polygalacturonase 2
AT1G70390	Chr 1	26529508-26529604	95	no	1	1	F-box and associated interaction domains-containing protein
AT1G71090	Chr 1	26812647-26813330	682	no	0	0	Auxin efflux carrier family protein
AT1G71170	Chr 1	26830876-26831208	331	no	0	0	6-phosphogluconate dehydrogenase family protein
AT1G71230	Chr 1	26852818-26852902	83	no	5	5	AJH2_CSN5_CSN5B__COP9-signalosome 5B
AT1G71691	Chr 1	26949777-26949858	80	no	4	4	GDSL-like Lipase/Acylhydrolase superfamily protein
AT1G71720	Chr 1	26984215-26984282	66	yes	7	7	PDE338__Nucleic acid-binding proteins superfamily
AT1G72010	Chr 1	27107960-27108868	907	no	0	0	TCP family transcription factor
AT1G72150	Chr 1	27148693-27149603	909	yes	3	3	PATL1__PATELLIN 1 PATL1__PATELLIN 1
AT1G72150	Chr 1	27148842-27149501	658	no	3	3	PATL1__PATELLIN 1 PATL1__PATELLIN 1
AT1G72410	Chr 1	27253099-27253237	137	no	11	10	COP1-interacting protein-related COP1-interacting protein-related
AT1G72410	Chr 1	27254948-27255052	103	no	11	10	COP1-interacting protein-related COP1-interacting protein-related
AT1G72680	Chr 1	27359924-27359990	65	no	5	5	ATCAD1_CAD1__cinnamyl-alcohol dehydrogenase
AT1G72830	Chr 1	27406250-27406326	75	yes	6	5	ATHAP2C_HAP2C_NF-YA3__nuclear factor Y, subunit A3
AT1G72970	Chr 1	27454571-27454652	80	no	6	6	EDA17_HTH__Glucose-methanol-choline (GMC) oxidoreductase family protein
AT1G73100	Chr 1	27492543-27493291	747	yes	2	0	SDG19_SUVH3__SU(VAR)3-9 homolog 3
AT1G73400	Chr 1	27598887-27599174	286	no	0	0	Pentatricopeptide repeat (PPR) superfamily protein Pentatricopeptide repeat (PPR) superfamily protein
AT1G73400	Chr 1	27599258-27599362	103	no	0	0	Pentatricopeptide repeat (PPR) superfamily protein Pentatricopeptide repeat (PPR) superfamily protein
AT1G73490	Chr 1	27633820-27633930	109	no	5	5	RNA-binding (RRM/RBD/RNP motifs) family protein
AT1G73700	Chr 1	27718912-27719010	97	no	7	7	MATE efflux family protein
AT1G73970	Chr 1	27818237-27818356	118	no	4	4	unknown protein; Has 34 Blast hits to 33 proteins in 15 species: Archae - 0; Bacteria - 0; Metazoa - 0; Fungi - 0; Plants - 32; Viruses - 0; Other Eukaryotes - 2 (source: NCBI BLink).
AT1G74170	Chr 1	27893097-27893744	646	no	7	6	AtRLP13_RLP13__receptor like protein 13
AT1G74230	Chr 1	27916384-27916613	228	yes	4	3	GR-RBP5__glycine-rich RNA-binding protein 5
AT1G74280	Chr 1	27930540-27930618	77	no	1	1	alpha/beta-Hydrolases superfamily protein
AT1G74310	Chr 1	27937967-27938064	96	yes	5	4	ATHSP101_HOT1_HSP101__heat shock protein 101
AT1G75030	Chr 1	28174686-28174837	150	yes	1	1	ATLP-3_TLP-3__thaumatin-like protein 3
AT1G75110	Chr 1	28194649-28194745	95	no	1	1	RRA2__Nucleotide-diphospho-sugar transferase family protein
AT1G75120	Chr 1	28197780-28197979	198	yes	1	1	RRA1__Nucleotide-diphospho-sugar transferase family protein
AT1G75360	Chr 1	28275168-28275657	488	no	0	0	unknown protein; Has 74 Blast hits to 71 proteins in 15 species: Archae - 0; Bacteria - 4; Metazoa - 4; Fungi - 0; Plants - 54; Viruses - 0; Other Eukaryotes - 12 (source: NCBI BLink).
AT1G75420	Chr 1	28306149-28306247	97	no	4	4	UDP-Glycosyltransferase superfamily protein
AT1G75730	Chr 1	28437637-28437743	105	yes	11	10	unknown protein; FUNCTIONS IN: molecular_function unknown; INVOLVED IN: biological_process unknown; EXPRESSED IN: 22 plant structures; EXPRESSED DURING: 12 growth stages.
AT1G75930	Chr 1	28508821-28508926	104	no	4	4	EXL6__extracellular lipase 6 EXL6__extracellular lipase 6
AT1G75930	Chr 1	28508832-28508926	93	yes	4	4	EXL6__extracellular lipase 6 EXL6__extracellular lipase 6
AT1G76090	Chr 1	28551233-28551599	365	no	0	0	SMT3__sterol methyltransferase 3
AT1G76140	Chr 1	28573645-28573774	128	no	11	11	Prolyl oligopeptidase family protein
AT1G76320	Chr 1	28632067-28632396	328	no	2	2	FRS4__FAR1-related sequence 4 FRS4__FAR1-related sequence 4
AT1G76320	Chr 1	28632493-28632588	94	no	2	2	FRS4__FAR1-related sequence 4 FRS4__FAR1-related sequence 4
AT1G76350	Chr 1	28640528-28640872	343	no	4	3	Plant regulator RWP-RK family protein
AT1G76810	Chr 1	28832262-28832476	213	yes	12	11	eukaryotic translation initiation factor 2 (eIF-2) family protein
AT1G77080	Chr 1	28958663-28958745	81	yes	5	5	AGL27_FLM_MAF1__K-box region and MADS-box transcription factor family protein
AT1G77380	Chr 1	29075755-29075855	99	yes	6	6	AAP3_ATAAP3__amino acid permease 3
AT1G77520	Chr 1	29130808-29130888	79	no	3	3	O-methyltransferase family protein
AT1G78180	Chr 1	29417571-29417642	70	no	3	3	Mitochondrial substrate carrier family protein
AT1G78320	Chr 1	29468096-29468178	81	yes	1	1	ATGSTU23_GSTU23__glutathione S-transferase TAU 23
AT1G78610	Chr 1	29570730-29571778	1047	yes	4	4	MSL6__mechanosensitive channel of small conductance-like 6
AT1G78850	Chr 1	29642379-29643004	624	yes	0	0	D-mannose binding lectin protein with Apple-like carbohydrate-binding domain D-mannose binding lectin protein with Apple-like carbohydrate-binding domain
AT1G78850	Chr 1	29642498-29643186	687	yes	0	0	D-mannose binding lectin protein with Apple-like carbohydrate-binding domain D-mannose binding lectin protein with Apple-like carbohydrate-binding domain
AT1G79710	Chr 1	29996683-29996829	145	no	4	4	Major facilitator superfamily protein
AT1G79790	Chr 1	30017442-30017518	75	yes	6	6	AtcpFHy1_FHY1__Haloacid dehalogenase-like hydrolase (HAD) superfamily protein
AT1G79970	Chr 1	30082890-30083024	133	no	2	1	unknown protein; FUNCTIONS IN: molecular_function unknown; INVOLVED IN: biological_process unknown; LOCATED IN: chloroplast; EXPRESSED IN: 23 plant structures; EXPRESSED DURING: 13 growth stages; BEST Arabidopsis thaliana protein match is: Protein of unknown function (DUF581) (TAIR:AT2G25690.2); Has 30201 Blast hits to 17322 proteins in 780 species: Archae - 12; Bacteria - 1396; Metazoa - 17338; …
AT1G80000	Chr 1	30094878-30094959	80	no	10	8	CASC3/Barentsz eIF4AIII binding
AT1G80150	Chr 1	30149665-30149761	95	no	1	0	Tetratricopeptide repeat (TPR)-like superfamily protein
AT1G80245	Chr 1	30174975-30175061	85	no	4	3	Spc97 / Spc98 family of spindle pole body (SBP) component
AT1G80280	Chr 1	30184128-30184241	112	no	4	4	alpha/beta-Hydrolases superfamily protein
AT1G80460	Chr 1	30247668-30247801	132	yes	3	3	GLI1_NHO1__Actin-like ATPase superfamily protein
AT1G80830	Chr 1	30373674-30373784	109	no	10	10	ATNRAMP1_NRAMP1_PMIT1__natural resistance-associated macrophage protein 1
AT1G80940	Chr 1	30411680-30411749	68	no	2	2	unknown protein; Has 30201 Blast hits to 17322 proteins in 780 species: Archae - 12; Bacteria - 1396; Metazoa - 17338; Fungi - 3422; Plants - 5037; Viruses - 0; Other Eukaryotes - 2996 (source: NCBI BLink).
AT2G01070	Chr 2	76063-76482	418	no	4	4	Lung seven transmembrane receptor family protein
AT2G01290	Chr 2	149443-149733	289	no	0	0	RPI2__ribose-5-phosphate isomerase 2
AT2G01320	Chr 2	154814-154907	92	no	11	11	ABCG7__ABC-2 type transporter family protein
AT2G01630	Chr 2	280317-281104	786	yes	2	2	O-Glycosyl hydrolases family 17 protein
AT2G01820	Chr 2	359942-360375	432	yes	1	1	Leucine-rich repeat protein kinase family protein
AT2G01830	Chr 2	367073-367165	91	no	10	8	AHK4_ATCRE1_CRE1_WOL_WOL1__CHASE domain containing histidine kinase protein
AT2G01950	Chr 2	441674-441778	103	no	0	0	BRL2_VH1__BRI1-like 2
AT2G02450	Chr 2	650395-650501	105	yes	3	3	ANAC034_ANAC035_LOV1_NAC035__NAC domain containing protein 35
AT2G02955	Chr 2	860655-860730	74	no	2	2	MEE12__maternal effect embryo arrest 12
AT2G02970	Chr 2	867521-867731	209	no	7	7	GDA1/CD39 nucleoside phosphatase family protein
AT2G02980	Chr 2	869400-869513	112	no	0	0	OTP85__Pentatricopeptide repeat (PPR) superfamily protein
AT2G03280	Chr 2	997593-997675	81	yes	7	7	O-fucosyltransferase family protein
AT2G03890	Chr 2	1186304-1187898	1593	yes	2	1	ATPI4K GAMMA 7_PI4K GAMMA 7_UBDK GAMMA 7__phosphoinositide 4-kinase gamma 7 ATPI4K GAMMA 7_PI4K GAMMA 7_UBDK GAMMA 7__phosphoinositide 4-kinase gamma 7
AT2G03890	Chr 2	1186339-1187613	1273	no	2	1	ATPI4K GAMMA 7_PI4K GAMMA 7_UBDK GAMMA 7__phosphoinositide 4-kinase gamma 7 ATPI4K GAMMA 7_PI4K GAMMA 7_UBDK GAMMA 7__phosphoinositide 4-kinase gamma 7
AT2G04220	Chr 2	1445717-1445844	126	yes	0	0	Plant protein of unknown function (DUF868)
AT2G04620	Chr 2	1611167-1612823	1655	no	0	0	Cation efflux family protein
AT2G04880	Chr 2	1719127-1719200	72	yes	4	3	ATWRKY1_WRKY1_ZAP1__zinc-dependent activator protein-1
AT2G05230	Chr 2	1900454-1900542	87	yes	1	0	DNAJ heat shock N-terminal domain-containing protein
AT2G05250	Chr 2	1914281-1914369	87	yes	1	0	DNAJ heat shock N-terminal domain-containing protein
AT2G05510	Chr 2	2016282-2016469	186	yes	2	2	Glycine-rich protein family Glycine-rich protein family Glycine-rich protein family
AT2G05510	Chr 2	2016303-2016466	162	yes	2	2	Glycine-rich protein family Glycine-rich protein family Glycine-rich protein family
AT2G05510	Chr 2	2016321-2016433	111	yes	2	2	Glycine-rich protein family Glycine-rich protein family Glycine-rich protein family
AT2G05520	Chr 2	2026610-2026713	102	yes	2	2	ATGRP-3_ATGRP3_GRP-3_GRP3__glycine-rich protein 3 ATGRP-3_ATGRP3_GRP-3_GRP3__glycine-rich protein 3 ATGRP-3_ATGRP3_GRP-3_GRP3__glycine-rich protein 3
AT2G05520	Chr 2	2026610-2026734	123	yes	2	2	ATGRP-3_ATGRP3_GRP-3_GRP3__glycine-rich protein 3 ATGRP-3_ATGRP3_GRP-3_GRP3__glycine-rich protein 3 ATGRP-3_ATGRP3_GRP-3_GRP3__glycine-rich protein 3
AT2G05520	Chr 2	2026628-2026734	105	yes	2	2	ATGRP-3_ATGRP3_GRP-3_GRP3__glycine-rich protein 3 ATGRP-3_ATGRP3_GRP-3_GRP3__glycine-rich protein 3 ATGRP-3_ATGRP3_GRP-3_GRP3__glycine-rich protein 3
AT2G05790	Chr 2	2200786-2200875	88	no	2	2	O-Glycosyl hydrolases family 17 protein
AT2G07560	Chr 2	3173230-3173393	162	yes	8	8	AHA6_HA6__H(+)-ATPase 6
AT2G13100	Chr 2	5390455-5390948	492	yes	3	2	AtG3Pp5_G3Pp5__Major facilitator superfamily protein
AT2G13610	Chr 2	5674396-5675108	711	yes	0	0	ABCG5__ABC-2 type transporter family protein
AT2G13840	Chr 2	5790824-5790940	115	no	4	4	Polymerase/histidinol phosphatase-like
AT2G14890	Chr 2	6399736-6400046	309	yes	1	1	AGP9__arabinogalactan protein 9
AT2G15090	Chr 2	6542794-6543489	694	no	0	0	KCS8__3-ketoacyl-CoA synthase 8
AT2G15530	Chr 2	6774767-6775648	880	no	7	5	RING/U-box superfamily protein
AT2G15730	Chr 2	6850499-6850591	91	no	5	5	P-loop containing nucleoside triphosphate hydrolases superfamily protein
AT2G16880	Chr 2	7313737-7314101	363	yes	0	0	Pentatricopeptide repeat (PPR) superfamily protein Pentatricopeptide repeat (PPR) superfamily protein Pentatricopeptide repeat (PPR) superfamily protein
AT2G16880	Chr 2	7313798-7313966	167	no	0	0	Pentatricopeptide repeat (PPR) superfamily protein Pentatricopeptide repeat (PPR) superfamily protein Pentatricopeptide repeat (PPR) superfamily protein
AT2G16880	Chr 2	7313841-7313961	119	no	0	0	Pentatricopeptide repeat (PPR) superfamily protein Pentatricopeptide repeat (PPR) superfamily protein Pentatricopeptide repeat (PPR) superfamily protein
AT2G17150	Chr 2	7467655-7467765	109	no	4	3	Plant regulator RWP-RK family protein
AT2G17220	Chr 2	7489191-7489265	73	no	5	5	Kin3__Protein kinase superfamily protein
AT2G17270	Chr 2	7510909-7511001	91	no	5	5	PHT3;3__phosphate transporter 3;3
AT2G17440	Chr 2	7572306-7572808	501	yes	3	2	PIRL5__plant intracellular ras group-related LRR 5
AT2G17840	Chr 2	7756962-7757040	77	no	3	3	ERD7__Senescence/dehydration-associated protein-related
AT2G18090	Chr 2	7866458-7866546	87	yes	3	3	PHD finger family protein / SWIB complex BAF60b domain-containing protein / GYF domain-containing protein
AT2G19570	Chr 2	8471319-8471443	123	yes	0	0	AT-CDA1_CDA1_DESZ__cytidine deaminase 1
AT2G19830	Chr 2	8558138-8558244	105	yes	7	5	SNF7.2_VPS32__SNF7 family protein
AT2G20240	Chr 2	8729163-8729227	63	yes	3	2	Protein of unknown function (DUF3741)
AT2G20250	Chr 2	8734407-8734488	80	no	7	7	unknown protein; Has 10 Blast hits to 10 proteins in 6 species: Archae - 0; Bacteria - 0; Metazoa - 0; Fungi - 2; Plants - 8; Viruses - 0; Other Eukaryotes - 0 (source: NCBI BLink).
AT2G20540	Chr 2	8844360-8844441	80	no	0	0	MEF21__mitochondrial editing factor 21
AT2G20680	Chr 2	8921183-8921311	127	no	4	4	AtMAN2_MAN2__Glycosyl hydrolase superfamily protein
AT2G20770	Chr 2	8946367-8946519	151	no	5	5	GCL2__GCR2-like 2
AT2G20950	Chr 2	9004651-9004714	62	no	7	6	Arabidopsis phospholipase-like protein (PEARLI 4) family
AT2G20990	Chr 2	9017193-9017293	99	yes	10	10	ATSYTA_NTMC2T1.1_NTMC2TYPE1.1_SYT1_SYTA__synaptotagmin A
AT2G21195	Chr 2	9083513-9083583	69	yes	3	3	unknown protein; FUNCTIONS IN: molecular_function unknown; INVOLVED IN: response to oxidative stress; LOCATED IN: cellular_component unknown; EXPRESSED IN: 23 plant structures; EXPRESSED DURING: 13 growth stages; Has 26 Blast hits to 26 proteins in 10 species: Archae - 0; Bacteria - 0; Metazoa - 0; Fungi - 0; Plants - 26; Viruses - 0; Other Eukaryotes - 0 (source: NCBI BLink).
AT2G21330	Chr 2	9128866-9128948	81	yes	6	6	FBA1__fructose-bisphosphate aldolase 1
AT2G21540	Chr 2	9223037-9223135	97	no	12	11	ATSFH3_SFH3__SEC14-like 3
AT2G21550	Chr 2	9227936-9228128	191	no	9	9	Bifunctional dihydrofolate reductase/thymidylate synthase
AT2G21660	Chr 2	9265583-9265740	156	yes	2	2	ATGRP7_CCR2_GR-RBP7_GRP7__cold, circadian rhythm, and rna binding 2 ATGRP7_CCR2_GR-RBP7_GRP7__cold, circadian rhythm, and rna binding 2 ATGRP7_CCR2_GR-RBP7_GRP7__cold, circadian rhythm, and rna binding 2 ATGRP7_CCR2_GR-RBP7_GRP7__cold, circadian rhythm, and rna binding 2
AT2G21660	Chr 2	9265583-9265716	132	yes	2	2	ATGRP7_CCR2_GR-RBP7_GRP7__cold, circadian rhythm, and rna binding 2 ATGRP7_CCR2_GR-RBP7_GRP7__cold, circadian rhythm, and rna binding 2 ATGRP7_CCR2_GR-RBP7_GRP7__cold, circadian rhythm, and rna binding 2 ATGRP7_CCR2_GR-RBP7_GRP7__cold, circadian rhythm, and rna binding 2
AT2G21660	Chr 2	9265622-9265716	93	yes	2	2	ATGRP7_CCR2_GR-RBP7_GRP7__cold, circadian rhythm, and rna binding 2 ATGRP7_CCR2_GR-RBP7_GRP7__cold, circadian rhythm, and rna binding 2 ATGRP7_CCR2_GR-RBP7_GRP7__cold, circadian rhythm, and rna binding 2 ATGRP7_CCR2_GR-RBP7_GRP7__cold, circadian rhythm, and rna binding 2
AT2G21660	Chr 2	9265649-9265716	66	yes	2	2	ATGRP7_CCR2_GR-RBP7_GRP7__cold, circadian rhythm, and rna binding 2 ATGRP7_CCR2_GR-RBP7_GRP7__cold, circadian rhythm, and rna binding 2 ATGRP7_CCR2_GR-RBP7_GRP7__cold, circadian rhythm, and rna binding 2 ATGRP7_CCR2_GR-RBP7_GRP7__cold, circadian rhythm, and rna binding 2
AT2G21830	Chr 2	9305408-9305492	83	no	2	2	Cysteine/Histidine-rich C1 domain family protein
AT2G22300	Chr 2	9475741-9475818	76	no	14	13	CAMTA3_SR1__signal responsive 1
AT2G22330	Chr 2	9488672-9488962	289	no	1	1	CYP79B3__cytochrome P450, family 79, subfamily B, polypeptide 3
AT2G22670	Chr 2	9637137-9637305	167	no	5	4	IAA8__indoleacetic acid-induced protein 8
AT2G23130	Chr 2	9844581-9844681	99	yes	1	1	AGP17_ATAGP17__arabinogalactan protein 17
AT2G23760	Chr 2	10111820-10112163	342	yes	4	3	BLH4_SAW2__BEL1-like homeodomain 4 BLH4_SAW2__BEL1-like homeodomain 4
AT2G23760	Chr 2	10112280-10112409	128	no	4	3	BLH4_SAW2__BEL1-like homeodomain 4 BLH4_SAW2__BEL1-like homeodomain 4
AT2G24050	Chr 2	10226098-10226177	78	yes	7	7	eIFiso4G2__MIF4G domain-containing protein / MA3 domain-containing protein
AT2G24180	Chr 2	10282064-10282704	639	yes	1	1	CYP71B6__cytochrome p450 71b6
AT2G24230	Chr 2	10302941-10304288	1346	no	0	0	Leucine-rich repeat protein kinase family protein
AT2G24600	Chr 2	10452749-10452909	159	yes	4	3	Ankyrin repeat family protein
AT2G25350	Chr 2	10799430-10799524	93	yes	9	9	Phox (PX) domain-containing protein
AT2G25520	Chr 2	10861270-10861519	248	no	0	0	Drug/metabolite transporter superfamily protein
AT2G25590	Chr 2	10891382-10891453	70	no	6	5	Plant Tudor-like protein
AT2G25840	Chr 2	11022779-11022884	104	no	12	12	OVA4__Nucleotidylyl transferase superfamily protein
AT2G26030	Chr 2	11092194-11092653	458	no	3	2	F-box/RNI-like/FBD-like domains-containing protein F-box/RNI-like/FBD-like domains-containing protein F-box/RNI-like/FBD-like domains-containing protein
AT2G26030	Chr 2	11092194-11092657	462	yes	3	2	F-box/RNI-like/FBD-like domains-containing protein F-box/RNI-like/FBD-like domains-containing protein F-box/RNI-like/FBD-like domains-containing protein
AT2G26030	Chr 2	11092205-11092657	451	no	3	2	F-box/RNI-like/FBD-like domains-containing protein F-box/RNI-like/FBD-like domains-containing protein F-box/RNI-like/FBD-like domains-containing protein
AT2G26350	Chr 2	11220298-11220411	112	no	10	10	ATPEX10_PEX10__peroxin 10
AT2G26470	Chr 2	11259614-11259717	102	yes	7	7	unknown protein; CONTAINS InterPro DOMAIN/s: Protein of unknown function DUF159 (InterPro:IPR003738); Has 3646 Blast hits to 3636 proteins in 1001 species: Archae - 41; Bacteria - 1922; Metazoa - 142; Fungi - 125; Plants - 44; Viruses - 14; Other Eukaryotes - 1358 (source: NCBI BLink).
AT2G26860	Chr 2	11452911-11453372	460	no	3	2	FBD, F-box and Leucine Rich Repeat domains containing protein
AT2G28290	Chr 2	12072240-12072334	93	yes	34	33	CHR3_SYD__P-loop containing nucleoside triphosphate hydrolases superfamily protein
AT2G28350	Chr 2	12115758-12115882	123	yes	3	3	ARF10__auxin response factor 10
AT2G28890	Chr 2	12406921-12407288	366	yes	3	3	PLL4__poltergeist like 4
AT2G29630	Chr 2	12668285-12668625	339	yes	6	3	PY_THIC__thiaminC
AT2G29640	Chr 2	12673023-12673151	127	no	4	4	JOSL__JOSEPHIN-like protein
AT2G30150	Chr 2	12875364-12875599	234	yes	1	1	UDP-Glycosyltransferase superfamily protein UDP-Glycosyltransferase superfamily protein
AT2G30150	Chr 2	12875536-12876064	527	no	1	1	UDP-Glycosyltransferase superfamily protein UDP-Glycosyltransferase superfamily protein
AT2G30600	Chr 2	13037896-13038048	151	no	12	11	BTB/POZ domain-containing protein
AT2G30990	Chr 2	13189249-13189340	90	yes	4	3	Protein of unknown function (DUF688)
AT2G31340	Chr 2	13362086-13362242	155	no	11	10	emb1381__embryo defective 1381
AT2G31800	Chr 2	13523291-13523355	63	yes	11	11	Integrin-linked protein kinase family
AT2G32230	Chr 2	13680632-13681612	979	no	6	5	PRORP1__proteinaceous RNase P 1
AT2G32250	Chr 2	13695171-13695248	76	no	8	6	FRS2__FAR1-related sequence 2
AT2G32390	Chr 2	13749314-13749403	88	no	7	7	ATGLR3.5_GLR3.5_GLR6__glutamate receptor 3.5
AT2G32450	Chr 2	13778695-13779563	867	yes	0	0	Calcium-binding tetratricopeptide family protein
AT2G32480	Chr 2	13789015-13790011	995	no	1	1	ARASP__ARABIDOPSIS SERIN PROTEASE
AT2G32630	Chr 2	13845700-13846031	330	yes	0	0	Pentatricopeptide repeat (PPR-like) superfamily protein
AT2G32850	Chr 2	13935641-13935702	60	yes	8	7	Protein kinase superfamily protein
AT2G33050	Chr 2	14022760-14024231	1470	yes	0	0	AtRLP26_RLP26__receptor like protein 26
AT2G33620	Chr 2	14235049-14235160	110	no	5	4	AT hook motif DNA-binding family protein
AT2G33730	Chr 2	14266176-14266257	80	no	0	0	P-loop containing nucleoside triphosphate hydrolases superfamily protein P-loop containing nucleoside triphosphate hydrolases superfamily protein
AT2G33730	Chr 2	14266791-14267446	654	yes	0	0	P-loop containing nucleoside triphosphate hydrolases superfamily protein P-loop containing nucleoside triphosphate hydrolases superfamily protein
AT2G34590	Chr 2	14569646-14569899	252	yes	4	4	Transketolase family protein
AT2G34960	Chr 2	14744821-14745614	792	yes	0	0	CAT5__cationic amino acid transporter 5
AT2G34970	Chr 2	14746480-14747645	1164	yes	0	0	Trimeric LpxA-like enzyme
AT2G35000	Chr 2	14752543-14752644	100	no	0	0	ATL9__RING/U-box superfamily protein
AT2G35150	Chr 2	14817975-14818036	60	yes	0	0	EXL7__EXORDIUM like 1
AT2G36240	Chr 2	15196107-15196418	310	no	0	0	pentatricopeptide (PPR) repeat-containing protein
AT2G36270	Chr 2	15205604-15206022	417	yes	4	3	ABI5_GIA1__Basic-leucine zipper (bZIP) transcription factor family protein
AT2G36350	Chr 2	15239613-15239995	381	yes	2	1	Protein kinase superfamily protein
AT2G36540	Chr 2	15325303-15325422	118	no	4	4	Haloacid dehalogenase-like hydrolase (HAD) superfamily protein
AT2G36630	Chr 2	15353336-15353441	104	no	9	9	Sulfite exporter TauE/SafE family protein Sulfite exporter TauE/SafE family protein
AT2G36630	Chr 2	15354193-15354299	105	yes	9	9	Sulfite exporter TauE/SafE family protein Sulfite exporter TauE/SafE family protein
AT2G36680	Chr 2	15369366-15369449	82	no	6	6	Modifier of rudimentary (Mod(r)) protein
AT2G36840	Chr 2	15453091-15453191	99	yes	5	5	ACR10__ACT-like superfamily protein
AT2G37040	Chr 2	15558269-15559304	1034	no	1	1	ATPAL1_PAL1__PHE ammonia lyase 1 ATPAL1_PAL1__PHE ammonia lyase 1
AT2G37040	Chr 2	15558412-15559236	823	no	1	1	ATPAL1_PAL1__PHE ammonia lyase 1 ATPAL1_PAL1__PHE ammonia lyase 1
AT2G37150	Chr 2	15605094-15605173	78	yes	6	5	RING/U-box superfamily protein
AT2G37230	Chr 2	15637421-15639227	1805	no	0	0	Tetratricopeptide repeat (TPR)-like superfamily protein
AT2G37250	Chr 2	15642944-15643006	61	no	3	3	ADK_ATPADK1__adenosine kinase
AT2G37710	Chr 2	15816351-15816702	350	no	0	0	RLK__receptor lectin kinase RLK__receptor lectin kinase
AT2G37710	Chr 2	15816373-15816459	85	no	0	0	RLK__receptor lectin kinase RLK__receptor lectin kinase
AT2G37770	Chr 2	15835991-15836119	127	no	6	6	AKR4C9_ChlAKR__NAD(P)-linked oxidoreductase superfamily protein
AT2G38160	Chr 2	15986907-15987150	242	no	5	4	unknown protein; FUNCTIONS IN: molecular_function unknown; INVOLVED IN: biological_process unknown; LOCATED IN: cellular_component unknown; EXPRESSED IN: 9 plant structures; EXPRESSED DURING: 4 anthesis, F mature embryo stage, petal differentiation and expansion stage, E expanded cotyledon stage, D bilateral stage; BEST Arabidopsis thaliana protein match is: unknown protein (TAIR:AT2G40070.2).
AT2G38400	Chr 2	16084514-16084633	118	no	6	6	AGT3__alanine:glyoxylate aminotransferase 3
AT2G38420	Chr 2	16091505-16091670	164	no	0	0	Pentatricopeptide repeat (PPR) superfamily protein
AT2G38820	Chr 2	16222795-16222862	66	yes	3	3	Protein of unknown function (DUF506)
AT2G38860	Chr 2	16234680-16234903	222	yes	3	3	YLS5__Class I glutamine amidotransferase-like superfamily protein
AT2G39260	Chr 2	16392370-16392571	200	no	16	16	binding;RNA binding
AT2G39340	Chr 2	16425150-16425246	95	no	13	12	AtSAC3A_SAC3A__SAC3/GANP/Nin1/mts3/eIF-3 p25 family
AT2G40340	Chr 2	16849457-16849592	134	no	1	1	AtERF48_DREB2C__Integrase-type DNA-binding superfamily protein
AT2G40920	Chr 2	17073305-17073532	226	no	2	2	F-box and associated interaction domains-containing protein
AT2G40940	Chr 2	17086035-17086207	171	yes	5	4	ERS_ERS1__ethylene response sensor 1 ERS_ERS1__ethylene response sensor 1
AT2G40940	Chr 2	17086243-17086461	217	no	5	4	ERS_ERS1__ethylene response sensor 1 ERS_ERS1__ethylene response sensor 1
AT2G41220	Chr 2	17178943-17179009	65	no	32	32	GLU2__glutamate synthase 2
AT2G41250	Chr 2	17202355-17202531	175	no	5	5	Haloacid dehalogenase-like hydrolase (HAD) superfamily protein
AT2G41550	Chr 2	17329596-17329725	128	no	5	4	Rho termination factor Rho termination factor
AT2G41550	Chr 2	17329868-17329931	62	no	5	4	Rho termination factor Rho termination factor
AT2G41610	Chr 2	17347455-17347710	254	no	0	0	unknown protein; Has 35333 Blast hits to 34131 proteins in 2444 species: Archae - 798; Bacteria - 22429; Metazoa - 974; Fungi - 991; Plants - 531; Viruses - 0; Other Eukaryotes - 9610 (source: NCBI BLink).
AT2G41750	Chr 2	17422190-17422274	83	no	0	0	DTW domain-containing protein
AT2G41840	Chr 2	17460995-17461284	288	yes	1	1	Ribosomal protein S5 family protein
AT2G42400	Chr 2	17655154-17655330	175	no	5	3	ATVOZ2_VOZ2__vascular plant one zinc finger protein 2
AT2G42700	Chr 2	17779738-17779823	84	yes	6	6	FUNCTIONS IN: molecular_function unknown; INVOLVED IN: vesicle-mediated transport, vesicle docking involved in exocytosis; LOCATED IN: cellular_component unknown; EXPRESSED IN: 22 plant structures; EXPRESSED DURING: 14 growth stages; CONTAINS InterPro DOMAIN/s: Sec1-like protein (InterPro:IPR001619).
AT2G42810	Chr 2	17813178-17813271	92	no	12	11	AtPP5_PAPP5_PP5_PP5.2__protein phosphatase 5.2
AT2G43180	Chr 2	17953957-17954032	74	no	6	6	Phosphoenolpyruvate carboxylase family protein
AT2G43410	Chr 2	18028319-18028449	129	yes	6	5	FPA__RNA binding
AT2G43590	Chr 2	18082515-18082735	219	yes	1	1	Chitinase family protein
AT2G43680	Chr 2	18110045-18110166	120	yes	5	3	IQD14__IQ-domain 14
AT2G44020	Chr 2	18218970-18219055	84	yes	0	0	Mitochondrial transcription termination factor family protein
AT2G44210	Chr 2	18280958-18281049	90	yes	6	6	Protein of Unknown Function (DUF239)
AT2G44640	Chr 2	18417358-18417455	96	yes	4	4	FUNCTIONS IN: molecular_function unknown; INVOLVED IN: biological_process unknown; LOCATED IN: mitochondrion, chloroplast, plasma membrane, plastid, chloroplast envelope; EXPRESSED IN: 23 plant structures; EXPRESSED DURING: 13 growth stages; CONTAINS InterPro DOMAIN/s: Protein of unknown function DUF3769 (InterPro:IPR022244); BEST Arabidopsis thaliana protein match is: pigment defective 320 (TAIR…
AT2G44730	Chr 2	18438023-18438396	372	yes	0	0	Alcohol dehydrogenase transcription factor Myb/SANT-like family protein
AT2G45510	Chr 2	18754150-18754340	189	yes	4	4	CYP704A2__cytochrome P450, family 704, subfamily A, polypeptide 2
AT2G45950	Chr 2	18906432-18906531	98	no	9	8	ASK20_SK20__SKP1-like 20 ASK20_SK20__SKP1-like 20
AT2G45950	Chr 2	18906453-18906531	77	no	9	8	ASK20_SK20__SKP1-like 20 ASK20_SK20__SKP1-like 20
AT2G46050	Chr 2	18939925-18940029	103	no	0	0	Pentatricopeptide repeat (PPR-like) superfamily protein
AT2G46560	Chr 2	19125409-19125509	99	yes	17	17	transducin family protein / WD-40 repeat family protein
AT2G46790	Chr 2	19234001-19234131	129	yes	6	6	APRR9_PRR9_TL1__pseudo-response regulator 9
AT2G46800	Chr 2	19238652-19239058	405	yes	1	0	ATCDF1_ATMTP1_MTP1_ZAT_ZAT1__zinc transporter of Arabidopsis thaliana
AT2G46950	Chr 2	19290804-19290904	99	yes	4	4	CYP709B2__cytochrome P450, family 709, subfamily B, polypeptide 2
AT2G46970	Chr 2	19297083-19297241	157	no	5	5	PIL1__phytochrome interacting factor 3-like 1
AT2G47450	Chr 2	19473360-19473489	128	no	0	0	CAO_CPSRP43__chloroplast signal recognition particle component (CAO)
AT3G01345	Chr 3	130031-130480	448	no	0	0	Expressed protein
AT3G01400	Chr 3	152465-152546	80	no	0	0	ARM repeat superfamily protein
AT3G01770	Chr 3	277414-278241	826	no	8	7	ATBET10_BET10__bromodomain and extraterminal domain protein 10
AT3G01980	Chr 3	328328-328419	90	yes	4	3	NAD(P)-binding Rossmann-fold superfamily protein
AT3G02150	Chr 3	392355-392448	92	no	2	1	PTF1_TCP13_TFPD__plastid transcription factor 1
AT3G02280	Chr 3	456866-456940	73	no	12	11	Flavodoxin family protein
AT3G02600	Chr 3	553043-553123	79	no	7	6	ATLPP3_LPP3__lipid phosphate phosphatase 3
AT3G02720	Chr 3	587567-587655	87	yes	4	4	Class I glutamine amidotransferase-like superfamily protein
AT3G02930	Chr 3	656297-658071	1773	yes	3	2	Plant protein of unknown function (DUF827)
AT3G02940	Chr 3	663290-663384	93	yes	3	2	AtMYB107_MYB107__myb domain protein 107
AT3G03130	Chr 3	721527-721733	205	no	3	3	unknown protein; BEST Arabidopsis thaliana protein match is: unknown protein (TAIR:AT5G17160.1); Has 7130 Blast hits to 3690 proteins in 504 species: Archae - 22; Bacteria - 2666; Metazoa - 1654; Fungi - 721; Plants - 246; Viruses - 56; Other Eukaryotes - 1765 (source: NCBI BLink).
AT3G03380	Chr 3	805015-805115	99	yes	23	23	DEG7_DegP7__DegP protease 7
AT3G03580	Chr 3	863040-863152	111	yes	0	0	Tetratricopeptide repeat (TPR)-like superfamily protein
AT3G03920	Chr 3	1010222-1010322	99	yes	3	3	H/ACA ribonucleoprotein complex, subunit Gar1/Naf1 protein H/ACA ribonucleoprotein complex, subunit Gar1/Naf1 protein
AT3G03920	Chr 3	1010252-1010361	108	yes	3	3	H/ACA ribonucleoprotein complex, subunit Gar1/Naf1 protein H/ACA ribonucleoprotein complex, subunit Gar1/Naf1 protein
AT3G03980	Chr 3	1031795-1031929	133	no	1	1	NAD(P)-binding Rossmann-fold superfamily protein
AT3G04160	Chr 3	1093189-1093287	97	no	4	3	unknown protein; FUNCTIONS IN: molecular_function unknown; INVOLVED IN: biological_process unknown; EXPRESSED IN: 7 plant structures; EXPRESSED DURING: F mature embryo stage, petal differentiation and expansion stage, E expanded cotyledon stage, D bilateral stage.
AT3G04500	Chr 3	1213702-1213774	71	no	5	5	RNA-binding (RRM/RBD/RNP motifs) family protein
AT3G04640	Chr 3	1261195-1261304	108	yes	2	1	glycine-rich protein glycine-rich protein
AT3G04640	Chr 3	1261243-1261322	78	yes	2	1	glycine-rich protein glycine-rich protein
AT3G04750	Chr 3	1301798-1303016	1217	no	0	0	Tetratricopeptide repeat (TPR)-like superfamily protein
AT3G04760	Chr 3	1304983-1305074	90	yes	0	0	Pentatricopeptide repeat (PPR-like) superfamily protein
AT3G05220	Chr 3	1490567-1490867	299	no	2	2	Heavy metal transport/detoxification superfamily protein Heavy metal transport/detoxification superfamily protein Heavy metal transport/detoxification superfamily protein
AT3G05220	Chr 3	1490578-1490723	144	yes	2	2	Heavy metal transport/detoxification superfamily protein Heavy metal transport/detoxification superfamily protein Heavy metal transport/detoxification superfamily protein
AT3G05220	Chr 3	1490578-1490741	162	yes	2	2	Heavy metal transport/detoxification superfamily protein Heavy metal transport/detoxification superfamily protein Heavy metal transport/detoxification superfamily protein
AT3G05320	Chr 3	1513729-1514248	518	no	0	0	O-fucosyltransferase family protein
AT3G05370	Chr 3	1537575-1537795	219	yes	0	0	AtRLP31_RLP31__receptor like protein 31
AT3G05430	Chr 3	1568412-1568493	80	no	1	1	Tudor/PWWP/MBT superfamily protein
AT3G05580	Chr 3	1618939-1619118	178	no	3	3	TOPP9__Calcineurin-like metallo-phosphoesterase superfamily protein
AT3G06180	Chr 3	1872227-1872322	94	no	1	1	Ribosomal protein L34e superfamily protein
AT3G06440	Chr 3	1974684-1974778	93	yes	7	6	Galactosyltransferase family protein Galactosyltransferase family protein
AT3G06440	Chr 3	1974690-1974903	212	no	7	6	Galactosyltransferase family protein Galactosyltransferase family protein
AT3G06510	Chr 3	2018188-2018291	102	yes	9	9	ATSFR2_SFR2__Glycosyl hydrolase superfamily protein
AT3G06880	Chr 3	2173607-2174289	681	yes	15	15	Transducin/WD40 repeat-like superfamily protein
AT3G06980	Chr 3	2202193-2202298	104	no	7	7	DEA(D/H)-box RNA helicase family protein
AT3G07120	Chr 3	2254672-2255037	364	no	0	0	RING/U-box superfamily protein
AT3G07310	Chr 3	2329376-2329466	89	no	1	1	Protein of unknown function (DUF760)
AT3G07390	Chr 3	2365884-2365995	110	no	0	0	AIR12__auxin-responsive family protein
AT3G07550	Chr 3	2410283-2410440	156	yes	1	0	RNI-like superfamily protein
AT3G07560	Chr 3	2412156-2412319	162	yes	4	4	APM2_PEX13__peroxin 13
AT3G07930	Chr 3	2526833-2527182	348	yes	1	1	DNA glycosylase superfamily protein
AT3G08040	Chr 3	2569011-2569097	85	no	12	11	ATFRD3_FRD3_MAN1__MATE efflux family protein
AT3G08630	Chr 3	2621126-2621199	72	yes	0	0	Protein of unknown function (DUF3411)
AT3G09440	Chr 3	2903763-2904808	1044	yes	2	1	Heat shock protein 70 (Hsp 70) family protein
AT3G09850	Chr 3	3023530-3025146	1615	no	0	0	D111/G-patch domain-containing protein
AT3G10040	Chr 3	3096711-3097541	829	no	0	0	sequence-specific DNA binding transcription factors
AT3G10340	Chr 3	3207190-3207338	147	yes	2	2	PAL4__phenylalanine ammonia-lyase 4
AT3G10730	Chr 3	3359568-3359791	222	yes	1	1	ATSUN2_SUN2__SAD1/UNC-84 domain protein 2
AT3G10890	Chr 3	3408442-3408527	84	yes	3	3	Glycosyl hydrolase superfamily protein
AT3G11000	Chr 3	3448653-3448744	90	yes	6	5	DCD (Development and Cell Death) domain protein
AT3G11020	Chr 3	3456011-3456196	184	no	1	0	DREB2_DREB2B__DRE/CRT-binding protein 2B
AT3G11640	Chr 3	3674632-3674717	84	yes	0	0	unknown protein; FUNCTIONS IN: molecular_function unknown; INVOLVED IN: biological_process unknown; LOCATED IN: endomembrane system; BEST Arabidopsis thaliana protein match is: unknown protein (TAIR:AT3G52480.1); Has 36 Blast hits to 36 proteins in 7 species: Archae - 0; Bacteria - 0; Metazoa - 0; Fungi - 0; Plants - 36; Viruses - 0; Other Eukaryotes - 0 (source: NCBI BLink).
AT3G11890	Chr 3	3757006-3757088	81	yes	2	1	Sterile alpha motif (SAM) domain-containing protein
AT3G12690	Chr 3	4031843-4032392	548	no	3	1	AGC1.5__AGC kinase 1.5
AT3G13030	Chr 3	4170391-4170491	99	yes	3	1	hAT transposon superfamily protein
AT3G13300	Chr 3	4304100-4304206	105	yes	12	12	VCS__Transducin/WD40 repeat-like superfamily protein
AT3G13390	Chr 3	4352157-4352601	443	no	2	2	sks11__SKU5 similar 11
AT3G13510	Chr 3	4404464-4404546	81	yes	6	6	Protein of Unknown Function (DUF239)
AT3G13760	Chr 3	4519141-4519254	112	no	0	0	Cysteine/Histidine-rich C1 domain family protein
AT3G13772	Chr 3	4522205-4522681	475	no	6	6	AtTMN7_TMN7__transmembrane nine 7
AT3G13790	Chr 3	4534496-4534991	494	no	5	5	ATBFRUCT1_ATCWINV1__Glycosyl hydrolases family 32 protein
AT3G13950	Chr 3	4605030-4605137	106	no	1	1	unknown protein; BEST Arabidopsis thaliana protein match is: unknown protein (TAIR:AT4G13266.1); Has 339 Blast hits to 265 proteins in 12 species: Archae - 0; Bacteria - 0; Metazoa - 0; Fungi - 0; Plants - 339; Viruses - 0; Other Eukaryotes - 0 (source: NCBI BLink).
AT3G14350	Chr 3	4784106-4784191	84	yes	16	16	SRF7__STRUBBELIG-receptor family 7
AT3G14570	Chr 3	4901271-4901478	206	no	41	41	ATGSL04_atgsl4_gsl04_GSL04__glucan synthase-like 4
AT3G14790	Chr 3	4965959-4966040	80	no	2	1	ATRHM3_RHM3__rhamnose biosynthesis 3
AT3G14920	Chr 3	5018666-5019491	824	no	0	0	Peptide-N4-(N-acetyl-beta-glucosaminyl)asparagine amidase A protein
AT3G15000	Chr 3	5051641-5051774	132	yes	3	3	cobalt ion binding
AT3G15090	Chr 3	5076908-5076979	70	no	6	6	GroES-like zinc-binding alcohol dehydrogenase family protein GroES-like zinc-binding alcohol dehydrogenase family protein
AT3G15090	Chr 3	5076908-5076997	88	no	6	6	GroES-like zinc-binding alcohol dehydrogenase family protein GroES-like zinc-binding alcohol dehydrogenase family protein
AT3G16700	Chr 3	5689266-5689331	64	no	6	6	Fumarylacetoacetate (FAA) hydrolase family
AT3G16710	Chr 3	5691358-5691459	100	no	0	0	Pentatricopeptide repeat (PPR) superfamily protein
AT3G17040	Chr 3	5812397-5812500	102	yes	8	8	HCF107__high chlorophyll fluorescent 107
AT3G17450	Chr 3	5974120-5975080	959	no	4	3	hAT dimerisation domain-containing protein
AT3G18130	Chr 3	6211564-6211676	111	yes	1	1	RACK1C_RACK1C_AT__receptor for activated C kinase 1C
AT3G18190	Chr 3	6232459-6232946	486	yes	0	0	TCP-1/cpn60 chaperonin family protein TCP-1/cpn60 chaperonin family protein
AT3G18190	Chr 3	6232630-6233357	726	yes	0	0	TCP-1/cpn60 chaperonin family protein TCP-1/cpn60 chaperonin family protein
AT3G18270	Chr 3	6263532-6263638	105	yes	5	5	CYP77A5P__cytochrome P450, family 77, subfamily A, polypeptide 5 pseudogene
AT3G18350	Chr 3	6299236-6299311	74	no	9	8	Plant protein of unknown function (DUF639)
AT3G18640	Chr 3	6414298-6415029	730	no	3	2	Zinc finger C-x8-C-x5-C-x3-H type family protein
AT3G19330	Chr 3	6700222-6700319	96	yes	4	3	Protein of unknown function (DUF677)
AT3G19460	Chr 3	6748498-6748601	102	yes	5	4	Reticulon family protein
AT3G19720	Chr 3	6851209-6851318	108	yes	17	17	ARC5_DRP5B__P-loop containing nucleoside triphosphate hydrolases superfamily protein
AT3G20300	Chr 3	7080225-7080312	86	no	3	3	Protein of unknown function (DUF3537)
AT3G20350	Chr 3	7098784-7098861	76	no	2	2	unknown protein; INVOLVED IN: biological_process unknown; LOCATED IN: plasma membrane; EXPRESSED IN: cotyledon; BEST Arabidopsis thaliana protein match is: unknown protein (TAIR:AT1G50660.1); Has 15095 Blast hits to 11224 proteins in 1051 species: Archae - 223; Bacteria - 1586; Metazoa - 7000; Fungi - 1255; Plants - 746; Viruses - 40; Other Eukaryotes - 4245 (source: NCBI BLink).
AT3G20770	Chr 3	7260929-7261043	113	no	1	0	AtEIN3_EIN3__Ethylene insensitive 3 family protein AtEIN3_EIN3__Ethylene insensitive 3 family protein
AT3G20770	Chr 3	7261255-7262090	834	yes	1	0	AtEIN3_EIN3__Ethylene insensitive 3 family protein AtEIN3_EIN3__Ethylene insensitive 3 family protein
AT3G21190	Chr 3	7433254-7433406	151	no	5	5	O-fucosyltransferase family protein
AT3G21295	Chr 3	7491849-7491938	88	no	2	2	Tudor/PWWP/MBT superfamily protein
AT3G21310	Chr 3	7498606-7498812	205	no	3	1	Core-2/I-branching beta-1,6-N-acetylglucosaminyltransferase family protein
AT3G21750	Chr 3	7664959-7665666	706	no	0	0	UGT71B1__UDP-glucosyl transferase 71B1
AT3G21940	Chr 3	7729836-7729961	124	no	1	1	Receptor protein kinase-related
AT3G22050	Chr 3	7764740-7764846	105	yes	1	1	Domain of unknown function (DUF26)
AT3G22420	Chr 3	7948263-7948345	81	yes	6	6	ATWNK2_WNK2_ZIK3__with no lysine (K) kinase 2
AT3G22760	Chr 3	8045770-8045893	122	no	9	9	SOL1__Tesmin/TSO1-like CXC domain-containing protein
AT3G23010	Chr 3	8176325-8176477	151	no	0	0	AtRLP36_RLP36__receptor like protein 36
AT3G23370	Chr 3	8359545-8359611	65	no	6	6	RNA-binding (RRM/RBD/RNP motifs) family protein
AT3G23620	Chr 3	8481421-8481491	69	yes	5	5	Ribosomal RNA processing Brix domain protein
AT3G23690	Chr 3	8530354-8530433	78	yes	6	6	basic helix-loop-helix (bHLH) DNA-binding superfamily protein
AT3G23900	Chr 3	8635604-8635720	115	no	7	6	RNA recognition motif (RRM)-containing protein
AT3G25030	Chr 3	9122908-9123029	120	yes	2	0	RING/U-box superfamily protein
AT3G25590	Chr 3	9302691-9302790	98	no	0	0	unknown protein; Has 149 Blast hits to 140 proteins in 44 species: Archae - 0; Bacteria - 6; Metazoa - 40; Fungi - 6; Plants - 39; Viruses - 0; Other Eukaryotes - 58 (source: NCBI BLink).
AT3G25820	Chr 3	9440052-9440137	84	yes	5	5	ATTPS-CIN_TPS-CIN__terpene synthase-like sequence-1,8-cineole
AT3G26085	Chr 3	9531042-9531130	87	yes	8	8	CAAX amino terminal protease family protein
AT3G26100	Chr 3	9539472-9539577	104	no	6	4	Regulator of chromosome condensation (RCC1) family protein
AT3G26510	Chr 3	9712331-9712444	112	no	2	1	Octicosapeptide/Phox/Bem1p family protein
AT3G26560	Chr 3	9750751-9752919	2167	no	1	1	ATP-dependent RNA helicase, putative
AT3G26600	Chr 3	9770364-9770590	225	yes	0	0	ARO4__armadillo repeat only 4 ARO4__armadillo repeat only 4
AT3G26600	Chr 3	9770584-9770828	243	yes	0	0	ARO4__armadillo repeat only 4 ARO4__armadillo repeat only 4
AT3G26782	Chr 3	9851146-9851231	84	yes	1	1	Tetratricopeptide repeat (TPR)-like superfamily protein
AT3G26890	Chr 3	9909384-9909980	595	no	5	4	unknown protein; FUNCTIONS IN: molecular_function unknown; INVOLVED IN: biological_process unknown; EXPRESSED IN: 24 plant structures; EXPRESSED DURING: 15 growth stages; BEST Arabidopsis thaliana protein match is: unknown protein (TAIR:AT5G41110.1).
AT3G27280	Chr 3	10077677-10077804	126	yes	2	1	ATPHB4_PHB4__prohibitin 4
AT3G27320	Chr 3	10090592-10090689	96	yes	2	2	alpha/beta-Hydrolases superfamily protein alpha/beta-Hydrolases superfamily protein
AT3G27320	Chr 3	10090837-10090920	82	no	2	2	alpha/beta-Hydrolases superfamily protein alpha/beta-Hydrolases superfamily protein
AT3G27330	Chr 3	10119259-10120199	939	yes	6	6	zinc finger (C3HC4-type RING finger) family protein
AT3G27390	Chr 3	10133745-10133927	181	no	7	6	unknown protein; FUNCTIONS IN: molecular_function unknown; INVOLVED IN: biological_process unknown; LOCATED IN: plasma membrane; EXPRESSED IN: 23 plant structures; EXPRESSED DURING: 13 growth stages; BEST Arabidopsis thaliana protein match is: unknown protein (TAIR:AT5G40640.1); Has 101 Blast hits to 99 proteins in 12 species: Archae - 0; Bacteria - 0; Metazoa - 0; Fungi - 0; Plants - 101; Viruse…
AT3G28040	Chr 3	10436930-10437627	696	yes	1	1	Leucine-rich receptor-like protein kinase family protein Leucine-rich receptor-like protein kinase family protein
AT3G28040	Chr 3	10436997-10438072	1074	yes	1	1	Leucine-rich receptor-like protein kinase family protein Leucine-rich receptor-like protein kinase family protein
AT3G28740	Chr 3	10789513-10789632	118	no	2	2	CYP81D11__Cytochrome P450 superfamily protein
AT3G28790	Chr 3	10814034-10814794	759	yes	2	2	Protein of unknown function (DUF1216) Protein of unknown function (DUF1216)
AT3G28790	Chr 3	10814219-10814742	522	yes	2	2	Protein of unknown function (DUF1216) Protein of unknown function (DUF1216)
AT3G28830	Chr 3	10831777-10832513	735	yes	2	2	Protein of unknown function (DUF1216)
AT3G29310	Chr 3	11249808-11250173	364	no	1	1	calmodulin-binding protein-related
AT3G29360	Chr 3	11268037-11268563	525	yes	1	0	UGD2__UDP-glucose 6-dehydrogenase family protein
AT3G42170	Chr 3	14322940-14323692	751	no	1	0	BED zinc finger ;hAT family dimerisation domain
AT3G43610	Chr 3	15522204-15522293	88	no	13	13	Spc97 / Spc98 family of spindle pole body (SBP) component
AT3G43740	Chr 3	15644659-15644750	90	yes	5	5	Leucine-rich repeat (LRR) family protein
AT3G44220	Chr 3	15928326-15928432	105	yes	1	1	Late embryogenesis abundant (LEA) hydroxyproline-rich glycoprotein family
AT3G44330	Chr 3	16006809-16006969	159	yes	13	13	INVOLVED IN: protein processing; LOCATED IN: mitochondrion, endoplasmic reticulum, plasma membrane, vacuole; EXPRESSED IN: 25 plant structures; EXPRESSED DURING: 13 growth stages; CONTAINS InterPro DOMAIN/s: Nicalin (InterPro:IPR016574), EF-Hand 1, calcium-binding site (InterPro:IPR018247), Nicastrin (InterPro:IPR008710); Has 245 Blast hits to 243 proteins in 99 species: Archae - 6; Bacteria - 10…
AT3G44480	Chr 3	16092529-16092699	169	no	7	6	cog1_RPP1__Disease resistance protein (TIR-NBS-LRR class) family
AT3G45140	Chr 3	16528235-16528302	66	yes	6	6	ATLOX2_LOX2__lipoxygenase 2
AT3G46600	Chr 3	17158209-17158298	88	no	2	2	GRAS family transcription factor GRAS family transcription factor
AT3G46600	Chr 3	17158242-17159407	1164	yes	2	2	GRAS family transcription factor GRAS family transcription factor
AT3G46700	Chr 3	17201008-17201238	229	no	1	1	UDP-Glycosyltransferase superfamily protein
AT3G46950	Chr 3	17289694-17289795	100	no	0	0	Mitochondrial transcription termination factor family protein
AT3G47390	Chr 3	17464051-17464137	85	no	12	9	PHS1__cytidine/deoxycytidylate deaminase family protein
AT3G47560	Chr 3	17525952-17526031	78	yes	5	5	alpha/beta-Hydrolases superfamily protein alpha/beta-Hydrolases superfamily protein
AT3G47560	Chr 3	17526408-17526490	81	yes	5	5	alpha/beta-Hydrolases superfamily protein alpha/beta-Hydrolases superfamily protein
AT3G47940	Chr 3	17688843-17689373	529	no	1	1	DNAJ heat shock family protein
AT3G48050	Chr 3	17734641-17736055	1413	yes	4	2	SUO__BAH domain ;TFIIS helical bundle-like domain
AT3G48890	Chr 3	18129776-18129849	72	yes	1	1	ATMAPR3_ATMP2_MAPR3_MSBP2__membrane-associated progesterone binding protein 3
AT3G48980	Chr 3	18157436-18157528	91	no	5	5	Arabidopsis thaliana protein of unknown function (DUF821)
AT3G49560	Chr 3	18370656-18370841	184	no	5	5	Mitochondrial import inner membrane translocase subunit Tim17/Tim22/Tim23 family protein
AT3G49601	Chr 3	18388646-18389144	497	no	1	0	FUNCTIONS IN: molecular_function unknown; INVOLVED IN: biological_process unknown; LOCATED IN: cellular_component unknown; CONTAINS InterPro DOMAIN/s: mRNA splicing factor, Cwf21 (InterPro:IPR013170); Has 30201 Blast hits to 17322 proteins in 780 species: Archae - 12; Bacteria - 1396; Metazoa - 17338; Fungi - 3422; Plants - 5037; Viruses - 0; Other Eukaryotes - 2996 (source: NCBI BLink).
AT3G49750	Chr 3	18450780-18450882	101	no	0	0	AtRLP44_RLP44__receptor like protein 44
AT3G49930	Chr 3	18510602-18510714	111	yes	0	0	C2H2 and C2HC zinc fingers superfamily protein
AT3G50950	Chr 3	18937016-18938413	1396	no	1	0	ZAR1__HOPZ-ACTIVATED RESISTANCE 1
AT3G51160	Chr 3	19007875-19008297	421	no	0	0	GMD2_MUR1_MUR_1__NAD(P)-binding Rossmann-fold superfamily protein
AT3G51250	Chr 3	19028265-19028960	694	no	3	3	Senescence/dehydration-associated protein-related
AT3G51940	Chr 3	19274069-19274132	62	no	1	1	unknown protein; BEST Arabidopsis thaliana protein match is: unknown protein (TAIR:AT5G03990.1); Has 215 Blast hits to 164 proteins in 38 species: Archae - 0; Bacteria - 35; Metazoa - 16; Fungi - 18; Plants - 121; Viruses - 0; Other Eukaryotes - 25 (source: NCBI BLink).
AT3G52120	Chr 3	19331347-19331455	107	no	8	7	SWAP (Suppressor-of-White-APricot)/surp domain-containing protein / D111/G-patch domain-containing protein
AT3G52200	Chr 3	19364017-19364078	60	yes	22	22	LTA3__Dihydrolipoamide acetyltransferase, long form protein
AT3G52340	Chr 3	19407586-19407724	137	no	7	6	ATSPP2_SPP2__sucrose-6F-phosphate phosphohydrolase 2 ATSPP2_SPP2__sucrose-6F-phosphate phosphohydrolase 2
AT3G52340	Chr 3	19407736-19407845	108	yes	7	6	ATSPP2_SPP2__sucrose-6F-phosphate phosphohydrolase 2 ATSPP2_SPP2__sucrose-6F-phosphate phosphohydrolase 2
AT3G52380	Chr 3	19422386-19422465	78	yes	3	3	CP33_PDE322__chloroplast RNA-binding protein 33
AT3G52950	Chr 3	19635261-19635766	504	yes	1	0	CBS / octicosapeptide/Phox/Bemp1 (PB1) domains-containing protein
AT3G53030	Chr 3	19662864-19663090	225	yes	3	3	SRPK4__ser/arg-rich protein kinase 4 SRPK4__ser/arg-rich protein kinase 4 SRPK4__ser/arg-rich protein kinase 4
AT3G53030	Chr 3	19663032-19663142	109	no	3	3	SRPK4__ser/arg-rich protein kinase 4 SRPK4__ser/arg-rich protein kinase 4 SRPK4__ser/arg-rich protein kinase 4
AT3G53030	Chr 3	19663455-19663558	102	yes	3	3	SRPK4__ser/arg-rich protein kinase 4 SRPK4__ser/arg-rich protein kinase 4 SRPK4__ser/arg-rich protein kinase 4
AT3G53100	Chr 3	19685783-19685873	89	no	4	4	GDSL-like Lipase/Acylhydrolase superfamily protein
AT3G53300	Chr 3	19760854-19760934	79	no	1	1	CYP71B31__cytochrome P450, family 71, subfamily B, polypeptide 31
AT3G53380	Chr 3	19790201-19791303	1101	yes	0	0	Concanavalin A-like lectin protein kinase family protein
AT3G53630	Chr 3	19884012-19884544	531	yes	1	1	unknown protein; BEST Arabidopsis thaliana protein match is: unknown protein (TAIR:AT4G18692.1); Has 42 Blast hits to 42 proteins in 10 species: Archae - 0; Bacteria - 0; Metazoa - 0; Fungi - 0; Plants - 42; Viruses - 0; Other Eukaryotes - 0 (source: NCBI BLink).
AT3G53710	Chr 3	19904822-19905111	288	yes	3	2	AGD6__ARF-GAP domain 6
AT3G53880	Chr 3	19954399-19954484	84	yes	6	6	AKR4C11__NAD(P)-linked oxidoreductase superfamily protein
AT3G53920	Chr 3	19962779-19962857	77	no	8	8	SIG3_SIGC__RNApolymerase sigma-subunit C
AT3G54090	Chr 3	20028239-20028769	529	no	1	1	FLN1__fructokinase-like 1
AT3G54150	Chr 3	20050880-20050957	76	no	2	2	S-adenosyl-L-methionine-dependent methyltransferases superfamily protein
AT3G54460	Chr 3	20163279-20163346	66	yes	7	7	SNF2 domain-containing protein / helicase domain-containing protein / F-box family protein SNF2 domain-containing protein / helicase domain-containing protein / F-box family protein
AT3G54460	Chr 3	20166721-20166811	89	no	7	7	SNF2 domain-containing protein / helicase domain-containing protein / F-box family protein SNF2 domain-containing protein / helicase domain-containing protein / F-box family protein
AT3G54540	Chr 3	20190954-20191713	758	no	1	0	ABCF4_ATGCN4_GCN4__general control non-repressible 4 ABCF4_ATGCN4_GCN4__general control non-repressible 4 ABCF4_ATGCN4_GCN4__general control non-repressible 4 ABCF4_ATGCN4_GCN4__general control non-repressible 4 ABCF4_ATGCN4_GCN4__general control non-repressible 4
AT3G54540	Chr 3	20190961-20192084	1122	yes	1	0	ABCF4_ATGCN4_GCN4__general control non-repressible 4 ABCF4_ATGCN4_GCN4__general control non-repressible 4 ABCF4_ATGCN4_GCN4__general control non-repressible 4 ABCF4_ATGCN4_GCN4__general control non-repressible 4 ABCF4_ATGCN4_GCN4__general control non-repressible 4
AT3G54540	Chr 3	20191073-20191948	874	no	1	0	ABCF4_ATGCN4_GCN4__general control non-repressible 4 ABCF4_ATGCN4_GCN4__general control non-repressible 4 ABCF4_ATGCN4_GCN4__general control non-repressible 4 ABCF4_ATGCN4_GCN4__general control non-repressible 4 ABCF4_ATGCN4_GCN4__general control non-repressible 4
AT3G54540	Chr 3	20191130-20191898	767	no	1	0	ABCF4_ATGCN4_GCN4__general control non-repressible 4 ABCF4_ATGCN4_GCN4__general control non-repressible 4 ABCF4_ATGCN4_GCN4__general control non-repressible 4 ABCF4_ATGCN4_GCN4__general control non-repressible 4 ABCF4_ATGCN4_GCN4__general control non-repressible 4
AT3G54540	Chr 3	20191148-20192166	1017	yes	1	0	ABCF4_ATGCN4_GCN4__general control non-repressible 4 ABCF4_ATGCN4_GCN4__general control non-repressible 4 ABCF4_ATGCN4_GCN4__general control non-repressible 4 ABCF4_ATGCN4_GCN4__general control non-repressible 4 ABCF4_ATGCN4_GCN4__general control non-repressible 4
AT3G54760	Chr 3	20270980-20271074	93	yes	3	1	dentin sialophosphoprotein-related
AT3G54950	Chr 3	20360360-20360746	385	no	1	1	PLA IIIA_PLP7_pPLAIIIbeta__patatin-like protein 6
AT3G55060	Chr 3	20404700-20405037	336	yes	4	3	unknown protein; BEST Arabidopsis thaliana protein match is: unknown protein (TAIR:AT2G39300.2); Has 61765 Blast hits to 33720 proteins in 2065 species: Archae - 846; Bacteria - 6964; Metazoa - 31967; Fungi - 5247; Plants - 3104; Viruses - 205; Other Eukaryotes - 13432 (source: NCBI BLink).
AT3G55370	Chr 3	20528568-20528662	93	yes	2	2	OBP3__OBF-binding protein 3
AT3G55760	Chr 3	20700663-20700815	151	no	4	3	unknown protein; EXPRESSED IN: 16 plant structures; EXPRESSED DURING: 10 growth stages; BEST Arabidopsis thaliana protein match is: unknown protein (TAIR:AT1G42430.2).
AT3G55980	Chr 3	20777499-20778277	777	yes	1	0	ATSZF1_SZF1__salt-inducible zinc finger 1
AT3G56150	Chr 3	20835164-20836175	1010	no	3	2	ATEIF3C-1_ATTIF3C1_EIF3C_EIF3C-1_TIF3C1__eukaryotic translation initiation factor 3C
AT3G56270	Chr 3	20870997-20871075	77	no	1	1	Plant protein of unknown function (DUF827)
AT3G56320	Chr 3	20888518-20888602	83	no	9	7	PAP/OAS1 substrate-binding domain superfamily
AT3G56680	Chr 3	20992423-20992520	96	yes	3	3	Single-stranded nucleic acid binding R3H protein
AT3G56840	Chr 3	21044950-21045027	76	no	5	5	FAD-dependent oxidoreductase family protein
AT3G57120	Chr 3	21139612-21139681	68	no	0	0	Protein kinase superfamily protein
AT3G57580	Chr 3	21321327-21321544	216	yes	0	0	F-box and associated interaction domains-containing protein
AT3G57590	Chr 3	21331128-21331213	84	yes	0	0	F-box and associated interaction domains-containing protein
AT3G57660	Chr 3	21361980-21362072	91	no	20	20	NRPA1__nuclear RNA polymerase A1
AT3G57770	Chr 3	21397827-21397937	109	no	1	1	Protein kinase superfamily protein
AT3G58050	Chr 3	21496252-21496447	194	no	8	8	unknown protein; BEST Arabidopsis thaliana protein match is: unknown protein (TAIR:AT2G41960.1); Has 13384 Blast hits to 8116 proteins in 546 species: Archae - 41; Bacteria - 766; Metazoa - 5596; Fungi - 1431; Plants - 589; Viruses - 46; Other Eukaryotes - 4915 (source: NCBI BLink).
AT3G58570	Chr 3	21660146-21660216	69	yes	6	5	P-loop containing nucleoside triphosphate hydrolases superfamily protein
AT3G58900	Chr 3	21773127-21773654	526	no	3	2	F-box/RNI-like superfamily protein
AT3G59310	Chr 3	21922917-21923011	93	yes	10	10	Eukaryotic protein of unknown function (DUF914)
AT3G59400	Chr 3	21949124-21949215	90	yes	0	0	GUN4__enzyme binding;tetrapyrrole binding
AT3G59910	Chr 3	22131851-22132038	186	yes	3	2	Ankyrin repeat family protein Ankyrin repeat family protein
AT3G59910	Chr 3	22132928-22133021	92	no	3	2	Ankyrin repeat family protein Ankyrin repeat family protein
AT3G60050	Chr 3	22181251-22181320	68	no	1	0	Pentatricopeptide repeat (PPR) superfamily protein
AT3G60320	Chr 3	22294911-22294984	72	yes	3	3	Protein of unknown function (DUF630 and DUF632)
AT3G60380	Chr 3	22317473-22318407	933	yes	0	0	FUNCTIONS IN: molecular_function unknown; INVOLVED IN: biological_process unknown; LOCATED IN: cellular_component unknown; EXPRESSED IN: 24 plant structures; EXPRESSED DURING: 13 growth stages; BEST Arabidopsis thaliana protein match is: hydroxyproline-rich glycoprotein family protein (TAIR:AT4G16790.1); Has 6102 Blast hits to 3981 proteins in 424 species: Archae - 6; Bacteria - 372; Metazoa - 26…
AT3G60380	Chr 3	22317473-22318428	954	yes	0	0	FUNCTIONS IN: molecular_function unknown; INVOLVED IN: biological_process unknown; LOCATED IN: cellular_component unknown; EXPRESSED IN: 24 plant structures; EXPRESSED DURING: 13 growth stages; BEST Arabidopsis thaliana protein match is: hydroxyproline-rich glycoprotein family protein (TAIR:AT4G16790.1); Has 6102 Blast hits to 3981 proteins in 424 species: Archae - 6; Bacteria - 372; Metazoa - 26…
AT3G60390	Chr 3	22321761-22321927	165	yes	3	3	HAT3__homeobox-leucine zipper protein 3
AT3G60590	Chr 3	22398766-22398886	119	no	2	2	unknown protein; LOCATED IN: chloroplast inner membrane; EXPRESSED IN: 23 plant structures; EXPRESSED DURING: 14 growth stages; BEST Arabidopsis thaliana protein match is: unknown protein (TAIR:AT1G48460.1); Has 30201 Blast hits to 17322 proteins in 780 species: Archae - 12; Bacteria - 1396; Metazoa - 17338; Fungi - 3422; Plants - 5037; Viruses - 0; Other Eukaryotes - 2996 (source: NCBI BLink). u…
AT3G60590	Chr 3	22398781-22398886	104	no	2	2	unknown protein; LOCATED IN: chloroplast inner membrane; EXPRESSED IN: 23 plant structures; EXPRESSED DURING: 14 growth stages; BEST Arabidopsis thaliana protein match is: unknown protein (TAIR:AT1G48460.1); Has 30201 Blast hits to 17322 proteins in 780 species: Archae - 12; Bacteria - 1396; Metazoa - 17338; Fungi - 3422; Plants - 5037; Viruses - 0; Other Eukaryotes - 2996 (source: NCBI BLink). u…
AT3G60750	Chr 3	22456020-22456472	451	no	6	6	Transketolase
AT3G60800	Chr 3	22469116-22469213	96	yes	6	6	DHHC-type zinc finger family protein
AT3G61690	Chr 3	22833086-22833240	153	yes	8	8	nucleotidyltransferases
AT3G61850	Chr 3	22896704-22896789	84	yes	2	2	DAG1__Dof-type zinc finger DNA-binding family protein
AT3G62240	Chr 3	23034499-23034620	120	yes	6	6	RING/U-box superfamily protein
AT3G62530	Chr 3	23132364-23132448	83	no	3	3	ARM repeat superfamily protein
AT3G62800	Chr 3	23226011-23226090	78	yes	4	3	DRB4__double-stranded-RNA-binding protein 4
AT3G63000	Chr 3	23284066-23284214	147	yes	1	1	NPL41__NPL4-like protein 1
AT3G63130	Chr 3	23326274-23326602	327	yes	1	0	ATRANGAP1_RANGAP1__RAN GTPase activating protein 1
AT3G63280	Chr 3	23380927-23381207	279	yes	15	13	ATNEK4_NEK4__NIMA-related kinase 4
AT3G66652	Chr 3	2085491-2086555	1063	no	5	4	fip1 motif-containing protein
AT4G00150	Chr 4	57787-57999	211	no	0	0	ATHAM3_HAM3_LOM3__GRAS family transcription factor
AT4G00335	Chr 4	147282-147367	84	yes	4	3	RHB1A__RING-H2 finger B1A
AT4G00480	Chr 4	217960-218041	80	no	8	8	ATMYC1_myc1__basic helix-loop-helix (bHLH) DNA-binding superfamily protein
AT4G00590	Chr 4	253839-253931	91	no	9	9	N-terminal nucleophile aminohydrolases (Ntn hydrolases) superfamily protein
AT4G00990	Chr 4	429666-429745	78	yes	13	12	Transcription factor jumonji (jmjC) domain-containing protein
AT4G01130	Chr 4	487471-487585	113	no	4	4	GDSL-like Lipase/Acylhydrolase superfamily protein
AT4G01690	Chr 4	732102-732194	91	no	9	9	HEMG1_PPO1_PPOX__Flavin containing amine oxidoreductase family
AT4G01740	Chr 4	755148-755238	89	no	1	1	Cysteine/Histidine-rich C1 domain family protein
AT4G02540	Chr 4	1118897-1119007	109	no	1	1	Cysteine/Histidine-rich C1 domain family protein
AT4G02550	Chr 4	1121016-1121104	87	yes	3	2	unknown protein; FUNCTIONS IN: molecular_function unknown; INVOLVED IN: biological_process unknown; LOCATED IN: cellular_component unknown; EXPRESSED IN: 18 plant structures; EXPRESSED DURING: 7 growth stages; BEST Arabidopsis thaliana protein match is: unknown protein (TAIR:AT4G02210.2).
AT4G02880	Chr 4	1275776-1276036	259	no	8	7	unknown protein; FUNCTIONS IN: molecular_function unknown; INVOLVED IN: biological_process unknown; LOCATED IN: cellular_component unknown; EXPRESSED IN: 24 plant structures; EXPRESSED DURING: 15 growth stages; BEST Arabidopsis thaliana protein match is: unknown protein (TAIR:AT1G03290.2).
AT4G03030	Chr 4	1336247-1336737	489	yes	0	0	Galactose oxidase/kelch repeat superfamily protein
AT4G03110	Chr 4	1376760-1376856	95	no	8	8	AtRBP-DR1_RBP-DR1__RNA-binding protein-defense related 1
AT4G03230	Chr 4	1422524-1422632	107	no	7	6	S-locus lectin protein kinase family protein
AT4G03250	Chr 4	1425933-1426021	87	yes	7	7	Homeodomain-like superfamily protein
AT4G03410	Chr 4	1503365-1503481	115	no	6	6	Peroxisomal membrane 22 kDa (Mpv17/PMP22) family protein
AT4G04670	Chr 4	2368691-2368879	187	no	8	8	Met-10+ like family protein / kelch repeat-containing protein
AT4G04770	Chr 4	2428593-2428919	325	no	1	1	ABC1_ABCI8_ATABC1_ATNAP1_LAF6__ATP binding cassette protein 1
AT4G04870	Chr 4	2463614-2463732	117	yes	7	7	CLS__cardiolipin synthase CLS__cardiolipin synthase
AT4G04870	Chr 4	2463871-2463946	74	no	7	7	CLS__cardiolipin synthase CLS__cardiolipin synthase
AT4G05090	Chr 4	2609868-2609946	77	no	8	8	Inositol monophosphatase family protein
AT4G05590	Chr 4	2907730-2907845	114	yes	4	4	CONTAINS InterPro DOMAIN/s: Uncharacterised protein family UPF0041 (InterPro:IPR005336); BEST Arabidopsis thaliana protein match is: Uncharacterised protein family (UPF0041) (TAIR:AT4G22310.1); Has 35333 Blast hits to 34131 proteins in 2444 species: Archae - 798; Bacteria - 22429; Metazoa - 974; Fungi - 991; Plants - 531; Viruses - 0; Other Eukaryotes - 9610 (source: NCBI BLink).
AT4G07400	Chr 4	4199026-4199114	87	yes	0	0	VFB3__VIER F-box proteine 3
AT4G07410	Chr 4	4201535-4201632	96	yes	10	10	PCN__Transducin family protein / WD-40 repeat family protein PCN__Transducin family protein / WD-40 repeat family protein
AT4G07410	Chr 4	4202763-4202859	95	no	10	10	PCN__Transducin family protein / WD-40 repeat family protein PCN__Transducin family protein / WD-40 repeat family protein
AT4G08810	Chr 4	5617337-5617572	234	yes	0	0	SUB1__calcium ion binding
AT4G08920	Chr 4	5725411-5725506	94	no	3	3	ATCRY1_BLU1_CRY1_HY4_OOP2__cryptochrome 1
AT4G10420	Chr 4	6453721-6454048	326	no	2	2	FBD / Leucine Rich Repeat domains containing protein
AT4G10470	Chr 4	6476786-6477183	396	yes	3	2	unknown protein; BEST Arabidopsis thaliana protein match is: unknown protein (TAIR:AT1G33050.2); Has 30201 Blast hits to 17322 proteins in 780 species: Archae - 12; Bacteria - 1396; Metazoa - 17338; Fungi - 3422; Plants - 5037; Viruses - 0; Other Eukaryotes - 2996 (source: NCBI BLink).
AT4G10710	Chr 4	6602519-6602898	378	yes	1	0	SPT16__global transcription factor C
AT4G10800	Chr 4	6644145-6644446	300	yes	1	0	BEST Arabidopsis thaliana protein match is: BTB/POZ domain-containing protein (TAIR:AT3G05675.1); Has 1807 Blast hits to 1807 proteins in 277 species: Archae - 0; Bacteria - 0; Metazoa - 736; Fungi - 347; Plants - 385; Viruses - 0; Other Eukaryotes - 339 (source: NCBI BLink).
AT4G10860	Chr 4	6679033-6679214	180	yes	0	0	unknown protein; BEST Arabidopsis thaliana protein match is: unknown protein (TAIR:AT4G10880.1); Has 1807 Blast hits to 1807 proteins in 277 species: Archae - 0; Bacteria - 0; Metazoa - 736; Fungi - 347; Plants - 385; Viruses - 0; Other Eukaryotes - 339 (source: NCBI BLink).
AT4G11000	Chr 4	6731750-6731827	76	no	2	2	Ankyrin repeat family protein
AT4G11110	Chr 4	6772424-6773276	851	no	7	6	SPA2__SPA1-related 2
AT4G11450	Chr 4	6959726-6961214	1487	no	2	1	Protein of unknown function (DUF3527)
AT4G11521	Chr 4	6985963-6986068	104	no	0	0	Receptor-like protein kinase-related family protein
AT4G11640	Chr 4	7022366-7022440	73	no	4	4	ATSR_SR__serine racemase
AT4G11970	Chr 4	7182596-7182946	349	no	8	6	YTH family protein
AT4G12610	Chr 4	7455780-7455989	208	no	10	7	ATRAP74_RAP74__transcription activators;DNA binding;RNA polymerase II transcription factors;catalytics;transcription initiation factors
AT4G12780	Chr 4	7513910-7513992	81	yes	8	8	Chaperone DnaJ-domain superfamily protein
AT4G13370	Chr 4	7779633-7780091	457	no	4	4	Plant protein of unknown function (DUF936)
AT4G13390	Chr 4	7784209-7784288	78	yes	0	0	EXT12__Proline-rich extensin-like family protein EXT12__Proline-rich extensin-like family protein
AT4G13390	Chr 4	7784935-7785018	82	no	0	0	EXT12__Proline-rich extensin-like family protein EXT12__Proline-rich extensin-like family protein
AT4G13460	Chr 4	7825470-7825964	493	no	2	0	SDG22_SET22_SUVH9__SU(VAR)3-9 homolog 9
AT4G13810	Chr 4	8006952-8007057	104	no	1	1	AtRLP47_RLP47__receptor like protein 47
AT4G13850	Chr 4	8021955-8022022	66	yes	5	4	ATGRP2_GR-RBP2_GRP2__glycine-rich RNA-binding protein 2 ATGRP2_GR-RBP2_GRP2__glycine-rich RNA-binding protein 2 ATGRP2_GR-RBP2_GRP2__glycine-rich RNA-binding protein 2
AT4G13850	Chr 4	8021955-8022040	84	yes	5	4	ATGRP2_GR-RBP2_GRP2__glycine-rich RNA-binding protein 2 ATGRP2_GR-RBP2_GRP2__glycine-rich RNA-binding protein 2 ATGRP2_GR-RBP2_GRP2__glycine-rich RNA-binding protein 2
AT4G13850	Chr 4	8021958-8022022	63	yes	5	4	ATGRP2_GR-RBP2_GRP2__glycine-rich RNA-binding protein 2 ATGRP2_GR-RBP2_GRP2__glycine-rich RNA-binding protein 2 ATGRP2_GR-RBP2_GRP2__glycine-rich RNA-binding protein 2
AT4G14290	Chr 4	8225760-8225870	109	no	13	13	alpha/beta-Hydrolases superfamily protein alpha/beta-Hydrolases superfamily protein
AT4G14290	Chr 4	8225764-8225870	105	yes	13	13	alpha/beta-Hydrolases superfamily protein alpha/beta-Hydrolases superfamily protein
AT4G14990	Chr 4	8566486-8567284	797	no	4	4	Topoisomerase II-associated protein PAT1
AT4G15090	Chr 4	8615155-8616655	1499	no	7	6	FAR1__FRS (FAR1 Related Sequences) transcription factor family
AT4G15240	Chr 4	8704975-8705083	107	no	3	2	Protein of unknown function (DUF604)
AT4G15550	Chr 4	8878271-8879235	963	yes	0	0	IAGLU__indole-3-acetate beta-D-glucosyltransferase
AT4G16580	Chr 4	9341847-9342096	248	no	0	0	Protein phosphatase 2C family protein Protein phosphatase 2C family protein
AT4G16580	Chr 4	9342066-9342147	80	no	0	0	Protein phosphatase 2C family protein Protein phosphatase 2C family protein
AT4G16790	Chr 4	9451993-9452369	375	yes	0	0	hydroxyproline-rich glycoprotein family protein
AT4G17090	Chr 4	9606474-9606568	93	yes	3	3	BAM3_BMY8_CT-BMY__chloroplast beta-amylase
AT4G17230	Chr 4	9662000-9662414	413	no	1	0	SCL13__SCARECROW-like 13
AT4G17250	Chr 4	9671242-9671349	106	no	1	1	unknown protein; FUNCTIONS IN: molecular_function unknown; INVOLVED IN: heat acclimation; LOCATED IN: cellular_component unknown; EXPRESSED IN: 12 plant structures; EXPRESSED DURING: 7 growth stages; BEST Arabidopsis thaliana protein match is: unknown protein (TAIR:AT5G47580.1).
AT4G17616	Chr 4	9819823-9821427	1603	no	0	0	Pentatricopeptide repeat (PPR) superfamily protein
AT4G18290	Chr 4	10116580-10116674	93	yes	10	10	KAT2__potassium channel in Arabidopsis thaliana 2
AT4G18520	Chr 4	10215695-10216193	497	no	0	0	Pentatricopeptide repeat (PPR) superfamily protein
AT4G18740	Chr 4	10303631-10303725	93	yes	3	3	Rho termination factor
AT4G18840	Chr 4	10338978-10339699	720	yes	0	0	Pentatricopeptide repeat (PPR-like) superfamily protein Pentatricopeptide repeat (PPR-like) superfamily protein
AT4G18840	Chr 4	10339266-10339490	223	no	0	0	Pentatricopeptide repeat (PPR-like) superfamily protein Pentatricopeptide repeat (PPR-like) superfamily protein
AT4G19200	Chr 4	10499382-10499491	108	yes	2	1	proline-rich family protein
AT4G19500	Chr 4	10627381-10627468	86	no	7	7	nucleoside-triphosphatases;transmembrane receptors;nucleotide binding;ATP binding
AT4G19985	Chr 4	10831341-10831690	348	yes	4	3	Acyl-CoA N-acyltransferases (NAT) superfamily protein
AT4G20830	Chr 4	11155718-11156088	369	yes	1	1	FAD-binding Berberine family protein
AT4G20890	Chr 4	11182386-11182542	155	no	2	2	TUB9__tubulin beta-9 chain
AT4G21580	Chr 4	11475849-11475949	99	yes	5	5	oxidoreductase, zinc-binding dehydrogenase family protein
AT4G21680	Chr 4	11518903-11518984	80	no	3	3	NRT1.8__NITRATE TRANSPORTER 1.8
AT4G21750	Chr 4	11560007-11560090	82	no	10	8	ATML1__Homeobox-leucine zipper family protein / lipid-binding START domain-containing protein
AT4G22190	Chr 4	11742553-11743115	561	yes	0	0	unknown protein; Has 283 Blast hits to 154 proteins in 44 species: Archae - 0; Bacteria - 2; Metazoa - 24; Fungi - 12; Plants - 48; Viruses - 0; Other Eukaryotes - 197 (source: NCBI BLink).
AT4G22220	Chr 4	11760653-11760786	132	yes	2	2	ATISU1_ISU1__SufE/NifU family protein
AT4G22280	Chr 4	11777032-11777313	280	no	3	2	F-box/RNI-like superfamily protein
AT4G22760	Chr 4	11961195-11961290	94	no	0	0	Tetratricopeptide repeat (TPR)-like superfamily protein
AT4G23290	Chr 4	12180318-12180448	129	yes	8	8	CRK21__cysteine-rich RLK (RECEPTOR-like protein kinase) 21
AT4G23640	Chr 4	12320881-12321313	431	no	8	8	ATKT3_KUP4_TRH1__Potassium transporter family protein
AT4G24200	Chr 4	12558356-12558769	412	no	1	0	Transcription elongation factor (TFIIS) family protein
AT4G24230	Chr 4	12568286-12568749	462	yes	3	3	ACBP3__acyl-CoA-binding domain 3
AT4G24240	Chr 4	12571978-12572071	92	no	2	2	ATWRKY7_WRKY7__WRKY DNA-binding protein 7
AT4G24330	Chr 4	12605916-12606136	219	yes	2	2	Protein of unknown function (DUF1682)
AT4G24500	Chr 4	12658904-12658992	87	yes	3	2	hydroxyproline-rich glycoprotein family protein
AT4G24900	Chr 4	12815702-12815812	109	no	6	6	unknown protein; Has 119 Blast hits to 96 proteins in 40 species: Archae - 0; Bacteria - 0; Metazoa - 81; Fungi - 0; Plants - 34; Viruses - 0; Other Eukaryotes - 4 (source: NCBI BLink).
AT4G24910	Chr 4	12818095-12818187	91	no	0	0	Protein of unknown function (DUF579)
AT4G25080	Chr 4	12877186-12877258	71	no	3	1	CHLM__magnesium-protoporphyrin IX methyltransferase
AT4G25310	Chr 4	12950611-12950696	84	yes	3	3	2-oxoglutarate (2OG) and Fe(II)-dependent oxygenase superfamily protein
AT4G25340	Chr 4	12961417-12961484	66	yes	10	10	ATFKBP53_FKBP53__FK506 BINDING PROTEIN 53
AT4G25710	Chr 4	13098644-13098721	76	no	1	1	Galactose oxidase/kelch repeat superfamily protein
AT4G26370	Chr 4	13334941-13335079	137	no	6	6	antitermination NusB domain-containing protein
AT4G26450	Chr 4	13362566-13363904	1337	no	3	3	unknown protein; Has 614 Blast hits to 492 proteins in 137 species: Archae - 0; Bacteria - 94; Metazoa - 255; Fungi - 76; Plants - 69; Viruses - 0; Other Eukaryotes - 120 (source: NCBI BLink).
AT4G26650	Chr 4	13446648-13446880	231	yes	3	3	RNA-binding (RRM/RBD/RNP motifs) family protein
AT4G26780	Chr 4	13485916-13486010	93	yes	4	4	AR192_MGE2__Co-chaperone GrpE family protein
AT4G27020	Chr 4	13571158-13571334	175	no	6	6	unknown protein; FUNCTIONS IN: molecular_function unknown; LOCATED IN: vacuole; BEST Arabidopsis thaliana protein match is: unknown protein (TAIR:AT5G54870.1); Has 1807 Blast hits to 1807 proteins in 277 species: Archae - 0; Bacteria - 0; Metazoa - 736; Fungi - 347; Plants - 385; Viruses - 0; Other Eukaryotes - 339 (source: NCBI BLink).
AT4G28590	Chr 4	14126465-14126562	96	yes	3	3	MRL7__FUNCTIONS IN: molecular_function unknown; INVOLVED IN: biological_process unknown; LOCATED IN: chloroplast; EXPRESSED IN: 21 plant structures; EXPRESSED DURING: 10 growth stages; BEST Arabidopsis thaliana protein match is: Thioredoxin superfamily protein (TAIR:AT2G31840.1); Has 114 Blast hits to 112 proteins in 39 species: Archae - 2; Bacteria - 0; Metazoa - 17; Fungi - 6; Plants - 67; Viru…
AT4G29700	Chr 4	14544625-14544985	359	no	0	0	Alkaline-phosphatase-like family protein
AT4G29780	Chr 4	14580323-14580425	101	no	0	0	unknown protein; BEST Arabidopsis thaliana protein match is: unknown protein (TAIR:AT5G12010.1); Has 945 Blast hits to 944 proteins in 87 species: Archae - 0; Bacteria - 0; Metazoa - 519; Fungi - 43; Plants - 365; Viruses - 0; Other Eukaryotes - 18 (source: NCBI BLink).
AT4G29930	Chr 4	14644982-14645061	78	yes	5	5	basic helix-loop-helix (bHLH) DNA-binding superfamily protein basic helix-loop-helix (bHLH) DNA-binding superfamily protein
AT4G29930	Chr 4	14644982-14645070	87	yes	5	5	basic helix-loop-helix (bHLH) DNA-binding superfamily protein basic helix-loop-helix (bHLH) DNA-binding superfamily protein
AT4G29950	Chr 4	14659502-14659620	117	yes	4	4	Ypt/Rab-GAP domain of gyp1p superfamily protein
AT4G30030	Chr 4	14682358-14682857	498	yes	0	0	Eukaryotic aspartyl protease family protein
AT4G30600	Chr 4	14940309-14940416	106	no	7	6	signal recognition particle receptor alpha subunit family protein
AT4G30700	Chr 4	14962696-14963816	1119	yes	0	0	Pentatricopeptide repeat (PPR) superfamily protein
AT4G30990	Chr 4	15097623-15097776	152	no	33	32	ARM repeat superfamily protein
AT4G31115	Chr 4	15130346-15130419	72	yes	6	6	Protein of unknown function (DUF1997)
AT4G31610	Chr 4	15319446-15319540	93	yes	6	6	ATREM1_REM1__Transcriptional factor B3 family protein
AT4G31850	Chr 4	15403091-15404534	1442	no	0	0	PGR3__proton gradient regulation 3
AT4G31880	Chr 4	15421376-15421483	106	no	13	13	LOCATED IN: cytosol; EXPRESSED IN: 24 plant structures; EXPRESSED DURING: 14 growth stages; BEST Arabidopsis thaliana protein match is: Tudor/PWWP/MBT superfamily protein (TAIR:AT1G15940.1).
AT4G32060	Chr 4	15503117-15503231	113	no	6	6	calcium-binding EF hand family protein
AT4G32070	Chr 4	15504981-15506240	1258	no	0	0	Phox4__Octicosapeptide/Phox/Bem1p (PB1) domain-containing protein / tetratricopeptide repeat (TPR)-containing protein
AT4G32430	Chr 4	15653336-15653473	136	no	0	0	Pentatricopeptide repeat (PPR) superfamily protein
AT4G32440	Chr 4	15658272-15658397	124	no	4	3	Plant Tudor-like RNA-binding protein
AT4G32670	Chr 4	15759701-15759787	85	no	8	8	RING/FYVE/PHD zinc finger superfamily protein
AT4G33030	Chr 4	15936893-15937039	145	no	2	1	SQD1__sulfoquinovosyldiacylglycerol 1
AT4G33050	Chr 4	15945838-15945953	114	yes	8	7	EDA39__calmodulin-binding family protein
AT4G33140	Chr 4	15981872-15982081	208	no	5	5	Haloacid dehalogenase-like hydrolase (HAD) superfamily protein
AT4G33520	Chr 4	16119040-16119363	322	no	16	16	AtHMAC6_HMA6_PAA1__P-type ATP-ase 1
AT4G33860	Chr 4	16230964-16231085	120	yes	5	5	Glycosyl hydrolase family 10 protein
AT4G34000	Chr 4	16297498-16297590	91	no	5	4	ABF3_AtABF3_DPBF5__abscisic acid responsive elements-binding factor 3
AT4G34030	Chr 4	16302170-16302237	66	yes	9	9	MCCB__3-methylcrotonyl-CoA carboxylase
AT4G34220	Chr 4	16382503-16382799	295	no	1	1	Leucine-rich repeat protein kinase family protein
AT4G35260	Chr 4	16775779-16775942	162	yes	3	3	IDH-I_IDH1__isocitrate dehydrogenase 1
AT4G35540	Chr 4	16875243-16875320	76	no	0	0	zinc ion binding;transcription regulators
AT4G35690	Chr 4	16922157-16922262	104	no	0	0	Arabidopsis protein of unknown function (DUF241)
AT4G36630	Chr 4	17272700-17272783	82	no	11	11	EMB2754__Vacuolar sorting protein 39 EMB2754__Vacuolar sorting protein 39
AT4G36630	Chr 4	17274802-17274876	73	no	11	11	EMB2754__Vacuolar sorting protein 39 EMB2754__Vacuolar sorting protein 39
AT4G36690	Chr 4	17295297-17295398	100	no	12	12	ATU2AF65A__U2 snRNP auxilliary factor, large subunit, splicing factor
AT4G36790	Chr 4	17336787-17336924	136	no	4	4	Major facilitator superfamily protein
AT4G37390	Chr 4	17580847-17581077	229	no	2	2	AUR3_BRU6_GH3-2_GH3.2_YDK1__Auxin-responsive GH3 family protein
AT4G37510	Chr 4	17628153-17628214	60	yes	4	4	Ribonuclease III family protein
AT4G37640	Chr 4	17685022-17686187	1164	yes	6	6	ACA2__calcium ATPase 2
AT4G37820	Chr 4	17786246-17786322	75	yes	1	0	unknown protein; BEST Arabidopsis thaliana protein match is: unknown protein (TAIR:AT2G22795.1); Has 433572 Blast hits to 177005 proteins in 4263 species: Archae - 2016; Bacteria - 67591; Metazoa - 157995; Fungi - 49745; Plants - 22011; Viruses - 2192; Other Eukaryotes - 132022 (source: NCBI BLink).
AT4G37890	Chr 4	17813360-17813425	64	no	1	1	EDA40__Zinc finger (C3HC4-type RING finger) family protein
AT4G38090	Chr 4	17884052-17884123	70	no	3	3	Ribosomal protein S5 domain 2-like superfamily protein
AT4G38660	Chr 4	18067363-18067761	397	no	2	2	Pathogenesis-related thaumatin superfamily protein
AT4G38890	Chr 4	18137390-18137556	165	yes	9	9	FMN-linked oxidoreductases superfamily protein
AT4G39260	Chr 4	18274209-18274399	189	yes	2	2	ATGRP8_CCR1_GR-RBP8_GRP8__cold, circadian rhythm, and RNA binding 1
AT4G39370	Chr 4	18307784-18307885	100	no	8	8	UBP27__ubiquitin-specific protease 27
AT4G39400	Chr 4	18325231-18327905	2673	yes	0	0	ATBRI1_BIN1_BRI1_CBB2_DWF2__Leucine-rich receptor-like protein kinase family protein
AT4G39520	Chr 4	18372014-18372097	82	no	9	9	GTP-binding protein-related
AT4G39960	Chr 4	18535541-18535742	200	no	7	6	Molecular chaperone Hsp40/DnaJ family protein
AT5G01020	Chr 5	7792-7883	90	yes	4	4	Protein kinase superfamily protein
AT5G01410	Chr 5	173033-173469	435	yes	0	0	ATPDX1_ATPDX1.3_PDX1_PDX1.3_RSR4__Aldolase-type TIM barrel family protein
AT5G01670	Chr 5	252521-252603	81	yes	7	7	NAD(P)-linked oxidoreductase superfamily protein
AT5G01780	Chr 5	303369-303452	82	no	3	3	2-oxoglutarate-dependent dioxygenase family protein 2-oxoglutarate-dependent dioxygenase family protein
AT5G01780	Chr 5	303374-303452	77	no	3	3	2-oxoglutarate-dependent dioxygenase family protein 2-oxoglutarate-dependent dioxygenase family protein
AT5G01910	Chr 5	358084-358164	79	no	2	2	unknown protein; FUNCTIONS IN: molecular_function unknown; INVOLVED IN: biological_process unknown; EXPRESSED IN: 16 plant structures; EXPRESSED DURING: 11 growth stages; Has 30201 Blast hits to 17322 proteins in 780 species: Archae - 12; Bacteria - 1396; Metazoa - 17338; Fungi - 3422; Plants - 5037; Viruses - 0; Other Eukaryotes - 2996 (source: NCBI BLink).
AT5G02110	Chr 5	417812-417916	103	no	3	3	CYCD7_CYCD7;1__CYCLIN D7;1
AT5G02500	Chr 5	554285-554388	102	yes	2	2	AT-HSC70-1_AtHsp70-1_HSC70_HSC70-1_HSP70-1__heat shock cognate protein 70-1 AT-HSC70-1_AtHsp70-1_HSC70_HSC70-1_HSP70-1__heat shock cognate protein 70-1
AT5G02500	Chr 5	554659-555194	534	yes	2	2	AT-HSC70-1_AtHsp70-1_HSC70_HSC70-1_HSP70-1__heat shock cognate protein 70-1 AT-HSC70-1_AtHsp70-1_HSC70_HSC70-1_HSP70-1__heat shock cognate protein 70-1
AT5G02850	Chr 5	652188-652288	99	yes	0	0	hydroxyproline-rich glycoprotein family protein
AT5G03240	Chr 5	772620-772849	228	yes	1	0	UBQ3__polyubiquitin 3
AT5G03320	Chr 5	802912-803004	91	no	4	3	Protein kinase superfamily protein
AT5G03390	Chr 5	835491-835905	413	no	1	1	Protein of unknown function (DUF295)
AT5G03800	Chr 5	1013293-1013432	138	yes	0	0	EMB166_EMB175_EMB1899__Pentatricopeptide repeat (PPR) superfamily protein
AT5G03900	Chr 5	1048385-1048457	71	no	13	12	Iron-sulphur cluster biosynthesis family protein Iron-sulphur cluster biosynthesis family protein
AT5G03900	Chr 5	1048578-1048683	104	no	13	12	Iron-sulphur cluster biosynthesis family protein Iron-sulphur cluster biosynthesis family protein
AT5G04170	Chr 5	1145748-1146021	272	no	4	4	Calcium-binding EF-hand family protein
AT5G04240	Chr 5	1173334-1174167	832	no	6	6	ELF6__Zinc finger (C2H2 type) family protein / transcription factor jumonji (jmj) family protein
AT5G04250	Chr 5	1176401-1176486	84	yes	10	9	Cysteine proteinases superfamily protein
AT5G04370	Chr 5	1233726-1233819	92	no	4	4	NAMT1__S-adenosyl-L-methionine-dependent methyltransferases superfamily protein
AT5G04390	Chr 5	1239663-1240039	375	yes	0	0	C2H2-type zinc finger family protein
AT5G04590	Chr 5	1320308-1320530	221	no	7	7	SIR__sulfite reductase
AT5G04920	Chr 5	1440981-1441492	510	yes	8	7	EAP30/Vps36 family protein EAP30/Vps36 family protein
AT5G04920	Chr 5	1441058-1441512	453	yes	8	7	EAP30/Vps36 family protein EAP30/Vps36 family protein
AT5G05180	Chr 5	1537616-1537689	72	yes	3	2	unknown protein; BEST Arabidopsis thaliana protein match is: unknown protein (TAIR:AT3G10880.1); Has 50151 Blast hits to 28081 proteins in 1838 species: Archae - 860; Bacteria - 6013; Metazoa - 25867; Fungi - 3836; Plants - 2236; Viruses - 90; Other Eukaryotes - 11249 (source: NCBI BLink).
AT5G06690	Chr 5	2060889-2060981	91	no	4	4	WCRKC1__WCRKC thioredoxin 1
AT5G06800	Chr 5	2103575-2103677	101	no	6	6	myb-like HTH transcriptional regulator family protein
AT5G06810	Chr 5	2111218-2112221	1002	yes	1	1	Mitochondrial transcription termination factor family protein
AT5G06950	Chr 5	2153392-2153477	84	yes	8	7	AHBP-1B_TGA2__bZIP transcription factor family protein AHBP-1B_TGA2__bZIP transcription factor family protein
AT5G06950	Chr 5	2153415-2153542	126	yes	8	7	AHBP-1B_TGA2__bZIP transcription factor family protein AHBP-1B_TGA2__bZIP transcription factor family protein
AT5G07110	Chr 5	2206243-2206313	69	yes	0	0	PRA1.B6__prenylated RAB acceptor 1.B6
AT5G07530	Chr 5	2383534-2383673	138	yes	2	2	ATGRP-7_ATGRP17_GRP17__glycine rich protein 17
AT5G07860	Chr 5	2512162-2512286	123	yes	1	1	HXXXD-type acyl-transferase family protein
AT5G08139	Chr 5	2617311-2617418	106	no	0	0	RING/U-box superfamily protein
AT5G08480	Chr 5	2744747-2744841	93	yes	2	1	VQ motif-containing protein VQ motif-containing protein
AT5G08480	Chr 5	2744747-2744844	96	yes	2	1	VQ motif-containing protein VQ motif-containing protein
AT5G08630	Chr 5	2799420-2799498	77	no	10	9	DDT domain-containing protein
AT5G09240	Chr 5	2873958-2874043	84	yes	3	3	ssDNA-binding transcriptional regulator
AT5G09400	Chr 5	2917660-2917749	88	no	9	9	KUP7__K+ uptake permease 7
AT5G10150	Chr 5	3182419-3182778	358	no	4	4	Domain of unknown function (DUF966)
AT5G10190	Chr 5	3200475-3200553	77	no	2	2	Major facilitator superfamily protein
AT5G10200	Chr 5	3202718-3203840	1121	no	2	1	ARM-repeat/Tetratricopeptide repeat (TPR)-like protein ARM-repeat/Tetratricopeptide repeat (TPR)-like protein
AT5G10200	Chr 5	3204013-3204142	128	no	2	1	ARM-repeat/Tetratricopeptide repeat (TPR)-like protein ARM-repeat/Tetratricopeptide repeat (TPR)-like protein
AT5G10290	Chr 5	3236387-3236485	97	no	10	9	leucine-rich repeat transmembrane protein kinase family protein
AT5G10560	Chr 5	3338844-3339153	308	no	5	5	Glycosyl hydrolase family protein
AT5G11650	Chr 5	3746533-3746617	83	no	6	6	alpha/beta-Hydrolases superfamily protein
AT5G11710	Chr 5	3775519-3775692	172	no	10	10	ENTH/VHS family protein
AT5G12220	Chr 5	3952183-3952362	178	no	6	6	las1-like family protein
AT5G12260	Chr 5	3967885-3967971	85	no	2	2	BEST Arabidopsis thaliana protein match is: glycosyltransferase family protein 2 (TAIR:AT5G60700.1); Has 1807 Blast hits to 1807 proteins in 277 species: Archae - 0; Bacteria - 0; Metazoa - 736; Fungi - 347; Plants - 385; Viruses - 0; Other Eukaryotes - 339 (source: NCBI BLink).
AT5G13290	Chr 5	4253782-4253858	75	yes	2	2	CRN_SOL2__Protein kinase superfamily protein
AT5G13930	Chr 5	4489457-4489802	344	no	1	1	ATCHS_CHS_TT4__Chalcone and stilbene synthase family protein
AT5G14460	Chr 5	4662258-4662376	117	yes	8	8	Pseudouridine synthase family protein
AT5G15210	Chr 5	4938212-4938550	337	no	0	0	ATHB30_HB30_ZFHD3_ZHD8__homeobox protein 30
AT5G15390	Chr 5	4995785-4995860	74	no	5	5	tRNA/rRNA methyltransferase (SpoU) family protein
AT5G15740	Chr 5	5135708-5135820	111	yes	7	7	O-fucosyltransferase family protein
AT5G17690	Chr 5	5828077-5828150	72	yes	5	5	AtLHP1_LHP1_TFL2__like heterochromatin protein (LHP1)
AT5G17900	Chr 5	5925367-5925484	116	no	2	1	microfibrillar-associated protein-related
AT5G18830	Chr 5	6279332-6279439	106	no	10	10	ATSPL7_SPL7__squamosa promoter binding protein-like 7
AT5G19780	Chr 5	6688272-6688338	65	no	4	4	TUA5__tubulin alpha-5 TUA5__tubulin alpha-5
AT5G19780	Chr 5	6688405-6688491	85	no	4	4	TUA5__tubulin alpha-5 TUA5__tubulin alpha-5
AT5G19980	Chr 5	6750174-6750496	321	yes	0	0	GONST4__golgi nucleotide sugar transporter 4 GONST4__golgi nucleotide sugar transporter 4
AT5G19980	Chr 5	6750328-6750496	167	no	0	0	GONST4__golgi nucleotide sugar transporter 4 GONST4__golgi nucleotide sugar transporter 4
AT5G20600	Chr 5	6967216-6967588	371	no	0	0	FUNCTIONS IN: molecular_function unknown; INVOLVED IN: rRNA processing; LOCATED IN: preribosome, small subunit precursor; EXPRESSED IN: 22 plant structures; EXPRESSED DURING: 13 growth stages; CONTAINS InterPro DOMAIN/s: Nucleolar, Nop52 (InterPro:IPR010301); Has 543 Blast hits to 530 proteins in 201 species: Archae - 0; Bacteria - 10; Metazoa - 211; Fungi - 164; Plants - 46; Viruses - 0; Other E…
AT5G21010	Chr 5	7137911-7137987	75	yes	3	3	ATBPM5_BPM5__BTB-POZ and MATH domain 5
AT5G22630	Chr 5	7525130-7525806	675	yes	0	0	ADT5__arogenate dehydratase 5
AT5G22690	Chr 5	7544325-7544537	211	no	4	4	Disease resistance protein (TIR-NBS-LRR class) family Disease resistance protein (TIR-NBS-LRR class) family
AT5G22690	Chr 5	7544325-7544559	233	no	4	4	Disease resistance protein (TIR-NBS-LRR class) family Disease resistance protein (TIR-NBS-LRR class) family
AT5G23170	Chr 5	7798898-7798995	96	yes	0	0	Protein kinase superfamily protein
AT5G23190	Chr 5	7805069-7805359	289	no	1	1	CYP86B1__cytochrome P450, family 86, subfamily B, polypeptide 1
AT5G23270	Chr 5	7839570-7839660	89	no	2	2	ATSTP11_STP11__sugar transporter 11
AT5G23390	Chr 5	7873253-7873328	74	no	9	9	Plant protein of unknown function (DUF639)
AT5G23890	Chr 5	8059980-8060050	69	yes	9	9	LOCATED IN: mitochondrion, chloroplast thylakoid membrane, chloroplast, plastid, chloroplast envelope; EXPRESSED IN: 24 plant structures; EXPRESSED DURING: 14 growth stages; CONTAINS InterPro DOMAIN/s: S-layer homology domain (InterPro:IPR001119); BEST Arabidopsis thaliana protein match is: unknown protein (TAIR:AT5G52410.2); Has 1807 Blast hits to 1807 proteins in 277 species: Archae - 0; Bacter…
AT5G23940	Chr 5	8077065-8077237	171	yes	1	1	DCR_EMB3009_PEL3__HXXXD-type acyl-transferase family protein
AT5G24010	Chr 5	8114770-8116106	1335	yes	0	0	Protein kinase superfamily protein
AT5G24120	Chr 5	8159300-8159568	267	yes	5	4	ATSIG5_SIG5_SIGE__sigma factor E
AT5G24680	Chr 5	8454585-8454681	95	no	5	5	Peptidase C78, ubiquitin fold modifier-specific peptidase 1/ 2
AT5G25070	Chr 5	8641352-8643118	1765	no	0	0	unknown protein; FUNCTIONS IN: molecular_function unknown; INVOLVED IN: biological_process unknown; LOCATED IN: cellular_component unknown; EXPRESSED IN: 23 plant structures; EXPRESSED DURING: 13 growth stages; Has 1807 Blast hits to 1807 proteins in 277 species: Archae - 0; Bacteria - 0; Metazoa - 736; Fungi - 347; Plants - 385; Viruses - 0; Other Eukaryotes - 339 (source: NCBI BLink).
AT5G25100	Chr 5	8648581-8648735	153	yes	6	6	Endomembrane protein 70 protein family
AT5G25460	Chr 5	8864438-8864527	88	no	2	2	Protein of unknown function, DUF642 Protein of unknown function, DUF642
AT5G25460	Chr 5	8864621-8864715	93	yes	2	2	Protein of unknown function, DUF642 Protein of unknown function, DUF642
AT5G26880	Chr 5	9459021-9459094	72	yes	6	6	AGL26__AGAMOUS-like 26
AT5G27280	Chr 5	9618114-9618184	69	yes	2	2	Zim17-type zinc finger protein
AT5G27750	Chr 5	9829014-9829118	103	no	3	2	F-box/FBD-like domains containing protein F-box/FBD-like domains containing protein
AT5G27750	Chr 5	9829212-9829278	65	no	3	2	F-box/FBD-like domains containing protein F-box/FBD-like domains containing protein
AT5G28470	Chr 5	10430515-10430655	139	no	4	4	Major facilitator superfamily protein
AT5G28540	Chr 5	10542852-10543015	162	yes	5	5	BIP1__heat shock protein 70 (Hsp 70) family protein
AT5G35220	Chr 5	13486778-13486843	64	no	9	9	EGY1__Peptidase M50 family protein
AT5G35560	Chr 5	13745271-13745350	78	yes	18	17	DENN (AEX-3) domain-containing protein
AT5G37370	Chr 5	14815843-14815938	94	no	5	4	ATSRL1__PRP38 family protein
AT5G38530	Chr 5	15425203-15425530	326	no	5	5	TSBtype2__tryptophan synthase beta type 2
AT5G38850	Chr 5	15555913-15556189	275	no	3	3	Disease resistance protein (TIR-NBS-LRR class)
AT5G38860	Chr 5	15559794-15559873	78	yes	5	5	BIM3__BES1-interacting Myc-like protein 3
AT5G39471	Chr 5	15794402-15795358	955	no	0	0	Cysteine/Histidine-rich C1 domain family protein Cysteine/Histidine-rich C1 domain family protein Cysteine/Histidine-rich C1 domain family protein
AT5G39471	Chr 5	15795051-15795358	306	yes	0	0	Cysteine/Histidine-rich C1 domain family protein Cysteine/Histidine-rich C1 domain family protein Cysteine/Histidine-rich C1 domain family protein
AT5G39471	Chr 5	15795062-15795358	295	no	0	0	Cysteine/Histidine-rich C1 domain family protein Cysteine/Histidine-rich C1 domain family protein Cysteine/Histidine-rich C1 domain family protein
AT5G39570	Chr 5	15844678-15844772	93	yes	1	1	FUNCTIONS IN: molecular_function unknown; INVOLVED IN: biological_process unknown; LOCATED IN: cytosol, nucleus; EXPRESSED IN: 25 plant structures; EXPRESSED DURING: 14 growth stages; BEST Arabidopsis thaliana protein match is: glycine-rich protein (TAIR:AT3G29075.1); Has 30201 Blast hits to 17322 proteins in 780 species: Archae - 12; Bacteria - 1396; Metazoa - 17338; Fungi - 3422; Plants - 5037;…
AT5G39680	Chr 5	15885423-15885513	89	no	0	0	EMB2744__Pentatricopeptide repeat (PPR) superfamily protein EMB2744__Pentatricopeptide repeat (PPR) superfamily protein
AT5G39680	Chr 5	15885594-15885906	311	no	0	0	EMB2744__Pentatricopeptide repeat (PPR) superfamily protein EMB2744__Pentatricopeptide repeat (PPR) superfamily protein
AT5G40170	Chr 5	16065707-16066737	1029	yes	0	0	AtRLP54_RLP54__receptor like protein 54 AtRLP54_RLP54__receptor like protein 54
AT5G40170	Chr 5	16066750-16067208	457	no	0	0	AtRLP54_RLP54__receptor like protein 54 AtRLP54_RLP54__receptor like protein 54
AT5G40810	Chr 5	16340991-16341140	148	no	7	6	Cytochrome C1 family
AT5G40910	Chr 5	16396747-16396980	232	no	3	3	Disease resistance protein (TIR-NBS-LRR class) family
AT5G41670	Chr 5	16666213-16666312	98	no	1	0	6-phosphogluconate dehydrogenase family protein
AT5G42130	Chr 5	16836108-16836228	119	no	0	0	AtMfl1_Mfl1__Mitochondrial substrate carrier family protein
AT5G42310	Chr 5	16916504-16917464	959	no	3	3	Pentatricopeptide repeat (PPR-like) superfamily protein
AT5G42370	Chr 5	16940954-16941034	79	no	6	6	Calcineurin-like metallo-phosphoesterase superfamily protein
AT5G42480	Chr 5	16987274-16987386	111	yes	5	5	ARC6__Chaperone DnaJ-domain superfamily protein
AT5G42490	Chr 5	16989187-16989267	79	no	9	9	ATP binding microtubule motor family protein
AT5G42870	Chr 5	17189186-17189412	225	yes	10	10	ATPAH2_PAH2__phosphatidic acid phosphohydrolase 2
AT5G42940	Chr 5	17217940-17218011	70	no	5	4	RING/U-box superfamily protein RING/U-box superfamily protein
AT5G42940	Chr 5	17218623-17219004	380	no	5	4	RING/U-box superfamily protein RING/U-box superfamily protein
AT5G43310	Chr 5	17384123-17384199	75	yes	12	11	COP1-interacting protein-related
AT5G43440	Chr 5	17456280-17456491	210	yes	2	2	2-oxoglutarate (2OG) and Fe(II)-dependent oxygenase superfamily protein
AT5G44190	Chr 5	17799798-17799898	99	yes	4	4	ATGLK2_GLK2_GPRI2__GOLDEN2-like 2
AT5G44490	Chr 5	17924832-17924908	75	yes	4	4	FBD, F-box, Skp2-like and Leucine Rich Repeat domains containing protein
AT5G44930	Chr 5	18141018-18141128	109	no	4	2	ARAD2__Exostosin family protein
AT5G45260	Chr 5	18326874-18327700	825	yes	6	6	ATWRKY52_RRS1_SLH1__Disease resistance protein (TIR-NBS-LRR class)
AT5G45310	Chr 5	18360629-18360771	141	yes	3	2	unknown protein; LOCATED IN: endomembrane system; EXPRESSED IN: stem, inflorescence meristem, root, leaf; EXPRESSED DURING: LP.04 four leaves visible; Has 30201 Blast hits to 17322 proteins in 780 species: Archae - 12; Bacteria - 1396; Metazoa - 17338; Fungi - 3422; Plants - 5037; Viruses - 0; Other Eukaryotes - 2996 (source: NCBI BLink).
AT5G45370	Chr 5	18389426-18389531	104	no	4	4	nodulin MtN21 /EamA-like transporter family protein
AT5G45470	Chr 5	18423416-18423489	72	yes	0	0	Protein of unknown function (DUF594) Protein of unknown function (DUF594)
AT5G45470	Chr 5	18424383-18424504	120	yes	0	0	Protein of unknown function (DUF594) Protein of unknown function (DUF594)
AT5G45540	Chr 5	18458999-18460241	1241	no	0	0	Protein of unknown function (DUF594)
AT5G45700	Chr 5	18537412-18537796	383	no	0	0	Haloacid dehalogenase-like hydrolase (HAD) superfamily protein
AT5G45790	Chr 5	18572720-18573144	423	yes	1	1	Ubiquitin carboxyl-terminal hydrolase family protein
AT5G46390	Chr 5	18816743-18816898	154	no	11	11	Peptidase S41 family protein
AT5G46450	Chr 5	18836366-18836436	69	yes	4	4	Disease resistance protein (TIR-NBS-LRR class) family
AT5G46470	Chr 5	18844142-18844225	82	no	10	5	RPS6__disease resistance protein (TIR-NBS-LRR class) family
AT5G46800	Chr 5	18989496-18989592	95	no	2	1	BOU__Mitochondrial substrate carrier family protein
AT5G47400	Chr 5	19229840-19229934	93	yes	3	3	unknown protein; FUNCTIONS IN: molecular_function unknown; LOCATED IN: endomembrane system; EXPRESSED IN: 23 plant structures; EXPRESSED DURING: 13 growth stages; Has 1807 Blast hits to 1807 proteins in 277 species: Archae - 0; Bacteria - 0; Metazoa - 736; Fungi - 347; Plants - 385; Viruses - 0; Other Eukaryotes - 339 (source: NCBI BLink).
AT5G47910	Chr 5	19400786-19401128	341	no	7	7	ATRBOHD_RBOHD__respiratory burst oxidase homologue D
AT5G48340	Chr 5	19591345-19591697	351	yes	4	2	unknown protein; FUNCTIONS IN: molecular_function unknown; INVOLVED IN: biological_process unknown; LOCATED IN: cellular_component unknown; EXPRESSED IN: 24 plant structures; EXPRESSED DURING: 14 growth stages.
AT5G48620	Chr 5	19719858-19719960	101	no	3	2	Disease resistance protein (CC-NBS-LRR class) family
AT5G48657	Chr 5	19734158-19734232	73	no	3	3	defense protein-related
AT5G48770	Chr 5	19774852-19775047	194	no	4	4	Disease resistance protein (TIR-NBS-LRR class) family
AT5G49070	Chr 5	19889073-19889207	133	no	1	1	KCS21__3-ketoacyl-CoA synthase 21
AT5G49660	Chr 5	20162482-20164330	1847	no	1	1	XIP1__Leucine-rich repeat transmembrane protein kinase family protein
AT5G49720	Chr 5	20197968-20198100	131	no	5	5	ATGH9A1_DEC_GH9A1_IRX2_KOR_KOR1_RSW2_TSD1__glycosyl hydrolase 9A1
AT5G50020	Chr 5	20352921-20353036	114	yes	5	5	DHHC-type zinc finger family protein
AT5G50160	Chr 5	20416553-20416649	95	no	7	7	ATFRO8_FRO8__ferric reduction oxidase 8
AT5G50210	Chr 5	20445145-20445267	121	no	6	6	OLD5_QS_SUFE3__quinolinate synthase
AT5G51300	Chr 5	20850171-20850847	675	yes	1	0	splicing factor-related
AT5G51560	Chr 5	20945953-20946051	97	no	3	3	Leucine-rich repeat protein kinase family protein
AT5G51640	Chr 5	20975862-20976003	140	no	3	2	TBL17_YLS7__Plant protein of unknown function (DUF828)
AT5G51750	Chr 5	21020485-21021797	1311	yes	0	0	ATSBT1.3_SBT1.3__subtilase 1.3
AT5G51770	Chr 5	21031324-21032066	741	yes	0	0	Protein kinase superfamily protein
AT5G52450	Chr 5	21289713-21289799	85	no	7	7	MATE efflux family protein
AT5G52470	Chr 5	21294617-21294723	105	yes	6	6	ATFBR1_ATFIB1_FBR1_FIB1_SKIP7__fibrillarin 1
AT5G52810	Chr 5	21400172-21400259	86	no	0	0	NAD(P)-binding Rossmann-fold superfamily protein
AT5G53150	Chr 5	21556494-21556662	167	no	1	1	DNAJ heat shock N-terminal domain-containing protein
AT5G53320	Chr 5	21637731-21637812	80	no	1	1	Leucine-rich repeat protein kinase family protein
AT5G53400	Chr 5	21661884-21661975	90	yes	5	5	BOB1__HSP20-like chaperones superfamily protein
AT5G54040	Chr 5	21930057-21930147	89	no	0	0	Cysteine/Histidine-rich C1 domain family protein
AT5G54630	Chr 5	22194106-22194204	97	no	1	1	zinc finger protein-related
AT5G55100	Chr 5	22361824-22361957	132	yes	4	4	SWAP (Suppressor-of-White-APricot)/surp domain-containing protein
AT5G55700	Chr 5	22552595-22552684	88	no	10	10	BAM4_BMY6__beta-amylase 4
AT5G55860	Chr 5	22610801-22610877	75	yes	2	1	Plant protein of unknown function (DUF827)
AT5G56030	Chr 5	22687923-22688003	79	no	2	2	AtHsp90.2_ERD8_HSP81-2_HSP81.2_HSP90.2__heat shock protein 81-2 AtHsp90.2_ERD8_HSP81-2_HSP81.2_HSP90.2__heat shock protein 81-2 AtHsp90.2_ERD8_HSP81-2_HSP81.2_HSP90.2__heat shock protein 81-2
AT5G56030	Chr 5	22688027-22688147	119	no	2	2	AtHsp90.2_ERD8_HSP81-2_HSP81.2_HSP90.2__heat shock protein 81-2 AtHsp90.2_ERD8_HSP81-2_HSP81.2_HSP90.2__heat shock protein 81-2 AtHsp90.2_ERD8_HSP81-2_HSP81.2_HSP90.2__heat shock protein 81-2
AT5G56030	Chr 5	22688236-22688948	711	yes	2	2	AtHsp90.2_ERD8_HSP81-2_HSP81.2_HSP90.2__heat shock protein 81-2 AtHsp90.2_ERD8_HSP81-2_HSP81.2_HSP90.2__heat shock protein 81-2 AtHsp90.2_ERD8_HSP81-2_HSP81.2_HSP90.2__heat shock protein 81-2
AT5G56350	Chr 5	22820943-22821051	107	no	2	2	Pyruvate kinase family protein
AT5G56380	Chr 5	22839647-22839777	129	yes	3	2	F-box/RNI-like/FBD-like domains-containing protein
AT5G56490	Chr 5	22872950-22873036	85	no	2	2	D-arabinono-1,4-lactone oxidase family protein
AT5G56810	Chr 5	22974618-22974753	134	no	2	2	F-box/RNI-like/FBD-like domains-containing protein
AT5G57460	Chr 5	23275570-23276054	483	yes	0	0	unknown protein; FUNCTIONS IN: molecular_function unknown; INVOLVED IN: biological_process unknown; LOCATED IN: plasma membrane, chloroplast; EXPRESSED IN: 23 plant structures; EXPRESSED DURING: 13 growth stages; Has 166 Blast hits to 166 proteins in 41 species: Archae - 0; Bacteria - 0; Metazoa - 112; Fungi - 4; Plants - 36; Viruses - 0; Other Eukaryotes - 14 (source: NCBI BLink).
AT5G57640	Chr 5	23345123-23345206	82	no	0	0	GCK domain-containing protein
AT5G58230	Chr 5	23556590-23556682	91	no	5	5	ATMSI1_MEE70_MSI1__Transducin/WD40 repeat-like superfamily protein
AT5G58430	Chr 5	23623126-23623190	63	yes	0	0	ATEXO70B1_EXO70B1__exocyst subunit exo70 family protein B1
AT5G58580	Chr 5	23677091-23677218	126	yes	0	0	ATL63_TL63__TOXICOS EN LEVADURA 63
AT5G59370	Chr 5	23951186-23951265	78	yes	4	3	ACT4__actin 4
AT5G59470	Chr 5	23979100-23979178	77	no	2	2	Mannose-P-dolichol utilization defect 1 protein
AT5G59980	Chr 5	24149272-24149349	76	no	6	6	Polymerase/histidinol phosphatase-like
AT5G60300	Chr 5	24266815-24266978	162	yes	2	1	LecRK-I.9__Concanavalin A-like lectin protein kinase family protein
AT5G60390	Chr 5	24289360-24289598	237	yes	3	2	GTP binding Elongation factor Tu family protein
AT5G60790	Chr 5	24455006-24455120	113	no	3	2	ABCF1_ATGCN1_GCN1__ABC transporter family protein ABCF1_ATGCN1_GCN1__ABC transporter family protein
AT5G60790	Chr 5	24455234-24455371	136	no	3	2	ABCF1_ATGCN1_GCN1__ABC transporter family protein ABCF1_ATGCN1_GCN1__ABC transporter family protein
AT5G60960	Chr 5	24529391-24529879	487	no	0	0	PNM1__Pentatricopeptide repeat (PPR) superfamily protein
AT5G61030	Chr 5	24561616-24561788	171	yes	4	3	GR-RBP3__glycine-rich RNA-binding protein 3
AT5G61390	Chr 5	24679598-24679735	136	no	5	5	Polynucleotidyl transferase, ribonuclease H-like superfamily protein
AT5G62480	Chr 5	25089295-25089374	78	yes	2	2	ATGSTU9_GST14_GST14B_GSTU9__glutathione S-transferase tau 9
AT5G63160	Chr 5	25334413-25334495	81	yes	4	4	BT1__BTB and TAZ domain protein 1
AT5G63370	Chr 5	25385077-25385151	73	no	2	0	Protein kinase superfamily protein
AT5G63450	Chr 5	25409782-25410247	464	no	0	0	CYP94B1__cytochrome P450, family 94, subfamily B, polypeptide 1
AT5G63550	Chr 5	25447090-25447178	87	yes	10	10	DEK domain-containing chromatin associated protein
AT5G63570	Chr 5	25452377-25452942	564	yes	2	2	GSA1__glutamate-1-semialdehyde-2,1-aminomutase
AT5G64490	Chr 5	25779886-25779999	112	no	0	0	ARM repeat superfamily protein
AT5G65170	Chr 5	26041725-26041891	165	yes	0	0	VQ motif-containing protein
AT5G65380	Chr 5	26125299-26125380	80	no	8	8	MATE efflux family protein
AT5G65440	Chr 5	26156500-26156584	83	no	20	19	unknown protein; INVOLVED IN: biological_process unknown; EXPRESSED IN: 22 plant structures; EXPRESSED DURING: 13 growth stages; BEST Arabidopsis thaliana protein match is: unknown protein (TAIR:AT4G24610.1).
AT5G65630	Chr 5	26226919-26227139	219	yes	2	2	GTE7__global transcription factor group E7 GTE7__global transcription factor group E7
AT5G65630	Chr 5	26227230-26227463	232	no	2	2	GTE7__global transcription factor group E7 GTE7__global transcription factor group E7
AT5G65710	Chr 5	26292677-26294710	2032	no	1	1	HSL2__HAESA-like 2
AT5G65810	Chr 5	26338321-26338417	95	no	6	5	CGR3__unknown protein; BEST Arabidopsis thaliana protein match is: unknown protein (TAIR:AT3G49720.2); Has 30201 Blast hits to 17322 proteins in 780 species: Archae - 12; Bacteria - 1396; Metazoa - 17338; Fungi - 3422; Plants - 5037; Viruses - 0; Other Eukaryotes - 2996 (source: NCBI BLink).
AT5G66070	Chr 5	26422518-26422591	72	yes	4	4	RING/U-box superfamily protein
AT5G66360	Chr 5	26511206-26511291	84	yes	2	2	DIM1B__Ribosomal RNA adenine dimethylase family protein
AT5G66480	Chr 5	26545156-26545242	85	no	3	2	unknown protein; FUNCTIONS IN: molecular_function unknown; INVOLVED IN: biological_process unknown; LOCATED IN: chloroplast; BEST Arabidopsis thaliana protein match is: unknown protein (TAIR:AT3G50910.1); Has 30201 Blast hits to 17322 proteins in 780 species: Archae - 12; Bacteria - 1396; Metazoa - 17338; Fungi - 3422; Plants - 5037; Viruses - 0; Other Eukaryotes - 2996 (source: NCBI BLink).
AT5G66730	Chr 5	26642254-26642374	119	no	3	3	ENY_IDD1__C2H2-like zinc finger protein
AT5G66910	Chr 5	26718875-26719006	130	no	4	4	Disease resistance protein (CC-NBS-LRR class) family
AT5G67080	Chr 5	26772773-26772844	70	no	0	0	MAPKKK19__mitogen-activated protein kinase kinase kinase 19
AT5G67150	Chr 5	26796715-26796891	175	no	0	0	HXXXD-type acyl-transferase family protein
AT5G67180	Chr 5	26803677-26803842	164	no	8	8	TOE3__target of early activation tagged (EAT) 3
AT5G67630	Chr 5	26968942-26969054	111	yes	1	1	P-loop containing nucleoside triphosphate hydrolases superfamily protein

## Sheet: ST2
Supplemental Table 2. Exitron (EI) splicing supported by ESTs in Arabidopsis thaliana
Gene id	EI coords	EI length (nt)	EI length is x3	# introns in gene	# introns in CDS	No. ESTs supporting EI isoform
AT1G02160	411253-411336	82	no	2	2	28
AT1G02850	631858-632009	150	yes	12	12	1
AT1G04300	1152947-1153036	88	no	12	11	4
AT1G05710	1716624-1716691	66	yes	5	4	48
AT1G06850	2106246-2106354	107	no	4	4	1
AT1G08570	2713142-2713236	93	yes	5	4	1
AT1G10990	3670901-3670980	78	yes	1	1	3
AT1G14170	4845150-4845226	75	yes	6	5	6
AT1G22430	7919749-7919832	82	no	8	8	1
AT1G26440	9145195-9145301	105	yes	6	5	2
AT1G28610	10054510-10054615	104	no	4	4	24
AT1G53250	19857843-19857948	104	no	5	5	5
AT1G54270	20260935-20261017	81	yes	4	3	1
AT1G54390	20305171-20305255	83	no	7	7	14
AT1G60560	22309321-22309401	79	no	5	5	1
AT1G61640	22747441-22747527	85	no	4	4	1
AT1G63230	23451669-23451757	87	yes	1	1	2
AT1G63630	23587415-23587549	133	no	3	2	7
AT1G65040	24163023-24163237	213	yes	8	7	1
AT1G69250	26034711-26034810	98	no	8	7	4
AT1G69526	26132046-26132140	93	yes	5	5	3
AT1G72830	27406250-27406326	75	yes	6	5	2
AT1G77080	28958663-28958745	81	yes	5	5	31
AT1G78180	29417571-29417642	70	no	3	3	1
AT1G79710	29996683-29996829	145	no	4	4	1
AT1G79790	30017442-30017518	75	yes	6	6	20
AT1G79970	30082890-30083024	133	no	2	1	2
AT2G02450	650395-650501	105	yes	3	3	3
AT2G03280	997593-997675	81	yes	7	7	8
AT2G04880	1719127-1719200	72	yes	4	3	6
AT2G05510	2016303-2016466	162	yes	2	2	4
AT2G13100	5390455-5390948	492	yes	3	2	1
AT2G21195	9083513-9083583	69	yes	3	3	32
AT2G21660	9265583-9265740	156	yes	2	2	1
AT2G21660	9265649-9265716	66	yes	2	2	3
AT2G24600	10452749-10452909	159	yes	4	3	1
AT2G30990	13189249-13189340	90	yes	4	3	2
AT2G32850	13935641-13935702	60	yes	8	7	1
AT2G36680	15369366-15369449	82	no	6	6	24
AT2G39340	16425150-16425246	95	no	13	12	2
AT2G43180	17953957-17954032	74	no	6	6	6
AT2G44210	18280958-18281049	90	yes	6	6	22
AT2G45950	18906432-18906531	98	no	9	8	1
AT3G01980	328328-328419	90	yes	4	3	41
AT3G02150	392355-392448	92	no	2	1	1
AT3G04500	1213702-1213774	71	no	5	5	1
AT3G07390	2365884-2365995	110	no	0	0	1
AT3G11640	3674632-3674717	84	yes	0	0	5
AT3G11890	3757006-3757088	81	yes	2	1	2
AT3G19330	6700222-6700319	96	yes	4	3	1
AT3G19460	6748498-6748601	102	yes	5	4	19
AT3G19720	6851209-6851318	108	yes	17	17	2
AT3G22420	7948263-7948345	81	yes	6	6	1
AT3G26085	9531042-9531130	87	yes	8	8	7
AT3G26510	9712331-9712444	112	no	2	1	35
AT3G27320	10090592-10090689	96	yes	2	2	1
AT3G43740	15644659-15644750	90	yes	5	5	162
AT3G47390	17464051-17464137	85	no	12	9	1
AT3G47560	17525952-17526031	78	yes	5	5	22
AT3G47560	17526408-17526490	81	yes	5	5	36
AT3G49750	18450780-18450882	101	no	0	0	1
AT3G55370	20528568-20528662	93	yes	2	2	3
AT3G59310	21922917-21923011	93	yes	10	10	3
AT3G60590	22398766-22398886	119	no	2	2	3
AT3G61850	22896704-22896789	84	yes	2	2	5
AT4G03110	1376760-1376856	95	no	8	8	8
AT4G03410	1503365-1503481	115	no	6	6	3
AT4G05590	2907730-2907845	114	yes	4	4	22
AT4G07410	4201535-4201632	96	yes	10	10	1
AT4G16580	9342066-9342147	80	no	0	0	1
AT4G17250	9671242-9671349	106	no	1	1	1
AT4G18740	10303631-10303725	93	yes	3	3	9
AT4G21580	11475849-11475949	99	yes	5	5	2
AT4G23290	12180318-12180448	129	yes	8	8	1
AT4G24900	12815702-12815812	109	no	6	6	2
AT4G26370	13334941-13335079	137	no	6	6	33
AT4G31115	15130346-15130419	72	yes	6	6	5
AT4G32060	15503117-15503231	113	no	6	6	1
AT4G33050	15945838-15945953	114	yes	8	7	9
AT5G01670	252521-252603	81	yes	7	7	16
AT5G05180	1537616-1537689	72	yes	3	2	1
AT5G06690	2060889-2060981	91	no	4	4	18
AT5G08480	2744747-2744841	93	yes	2	1	1
AT5G09240	2873958-2874043	84	yes	3	3	16
AT5G13290	4253782-4253858	75	yes	2	2	1
AT5G25460	8864438-8864527	88	no	2	2	2
AT5G37370	14815843-14815938	94	no	5	4	1
AT5G39471	15795062-15795358	295	no	0	0	2
AT5G45790	18572720-18573144	423	yes	1	1	2
AT5G47400	19229840-19229934	93	yes	3	3	1
AT5G48657	19734158-19734232	73	no	3	3	6
AT5G52810	21400172-21400259	86	no	0	0	1
AT5G59470	23979100-23979178	77	no	2	2	2
AT5G59980	24149272-24149349	76	no	6	6	1
AT5G62480	25089295-25089374	78	yes	2	2	1
AT5G63370	25385077-25385151	73	no	2	0	2
AT5G65440	26156500-26156584	83	no	20	19	6
AT5G66070	26422518-26422591	72	yes	4	4	20
AT5G66360	26511206-26511291	84	yes	2	2	1
AT5G66480	26545156-26545242	85	no	3	2	1

## Sheet: ST3
Supplemental Table 3. Peptides supporting exitron (EI) splicing in Arabidopsis
Gene id	EI coords	EIx3	Peptide sequence supporting EI-spliced isoform
AT1G08570	2713142-2713236	yes	FSPIVFGDSQDESFRR
AT1G14170*	4845150-4845226	yes	NIHDQNVIASEDTVYR
AT1G69526	26132046-26132140	yes	SYEAEIAEYK
AT3G06510	2018188-2018291	yes	LDFIGINYYGQEAVCGAGLK
AT3G19330	6700222-6700319	yes	LIHHATAGPLCSPYLPHSFK
AT3G43740	15644659-15644750	yes	LEHLQYLELYK
AT4G26370	13334941-13335079	no	IEAEVLSAPPK
AT5G01670	252521-252603	yes	LWCTELSPER
AT5G04170*	1145748-1146021	no	RLSSASLLWK
AT5G04370	1233726-1233819	no	QHSRFTD
AT5G60790*	24455006-24455120	no	FLWWLEDENCIGK
*peptides supporting both EI-containing and EI-spliced protein isoforms were found

## Sheet: ST4
Supplemental Table 4. RT-PCR primers for exitron (EI) splicing validation in Arabidopsis
Gene ID	Primer forward	Primer reverse	Gene description
AT1G04945	GCAAGGCAGAGGGCGTTGGT	GCTCGAACAAGAGAGCTTCAGGCA	HIT-type Zinc finger family protein
AT1G16390	CGGCAATGGTGGTTGGATTC	ATTTTCCCGACCAGCAGCAA	OCT3__organic cation/carnitine transporter 3
AT1G33400	TGCCGAGTGTGCAAATGGAAGT	TGGCTCCCCTACACTCATGCTGG	Tetratricopeptide repeat (TPR)-like superfamily protein
AT1G43980	AATGAACGTCTGCTCCGTGA	AGGAAGTGGCTTTGGATCAGT	Tetratricopeptide repeat (TPR)-like superfamily protein
AT1G53350	AGCGTCAGCTGGGAAGGTTACA	TGAACGTCCACCACCATCAGCA	Disease resistance protein (CC-NBS-LRR class) family
AT1G63100	GCTGCAGGAAGGCTACTCTC	AGACCAGTGGTTGTTCGCTT	GRAS family transcription factor
AT1G71230	TGGCACAACTCCTCCAAAGCG	ATGGTGGTTCACGCTCGCTC	CSN5B (COP9-SIGNALOSOME 5B)
AT1G75120	TCGCCTGAACGGGTCAAGATGT	ACTGCTTGGTCCCATCCCCC	RRA1 Nucleotide-diphospho-sugar transferase family protein
AT1G79970	GGGATGAGCCGGGGCATCAG	GAGCACCTGCATTTGGGGGCT	Unknown protein
AT3G03380	AGAGCTGGGGTCCCTCGACA	GCACGCTCAGCCAATGAAGCA	DegP7__DegP protease 7
AT3G04500	GCGATTCGGCGATTTGCTTCTCC	CCCAAGATCACCACAGAACAGACG	RNA recognition motif-containing protein
AT3G07930	TCGGCGACTTGGTAGGGACGA	ACGTTTGCTGCTTCCTTTCCGA	DNA glycosylase superfamily protein
AT3G25030	CCGCCGTCGAGGAGCCAATC	CTCTCCGCCGGCGTTTCCTC	RING/U-box domain-containing protein
AT3G53920	GCTGCGCATCTGTATCTCCT	CACACTCGACCTCCTTGCTT	RNApolymerase sigma-subunit C
AT3G61690	TAGGCATTGGGGGTCGTCGT	CCAGGCTTGGGTCGCTTACC	nucleotidyltransferases
AT4G29930	AGCTAGAATCACGGTCAACATTGC	TTCGAGAACTTCAATGGGGTAGTGT	transcription factor bHLH27
AT5G02110	GGCCACAACGCTTGGTGGGT	TGAAACGGTATTTTCCGCCGCT	CYCD7;1 (CYCLIN D7;1); cyclin-dependent protein kinase
AT5G22630	AAACCATTTCGCCTGCGTTC	GTCGCCTACGACTCTAACGG	ADT5__AROGENATE DEHYDRATASE 5
AT5G35560	TGCGTCCTTACCAGACTGCCG	CCTCCTCTCACATGGAGCAGCCT	DENN (AEX-3) domain-containing protein
AT5G67080	AGGAGAAACTATCGGATACGGAAC	AATCCGCAATCTTAACGGCG	MAPKKK19__mitogen-activated protein kinase kinase kinase 19
AT3G52590	ACACCATCGACAATGTCAAGGCCA	CCTGCAGTTGACAGCTCTTGGGT	UBQ1 [loading control]

## Sheet: ST5
Supplemental Table 5. Arabidopsis thaliana ecotypes used in this study
Agu-1
Bak-2
Bak-7
Cdm-0
Del-10
Dog-4
Don-0
Ey15-2
Fei-0
HKT2.4
ICE102
ICE104
ICE106
ICE107
ICE111
ICE112
ICE119
ICE120
ICE127
ICE130
ICE134
ICE138
ICE150
ICE152
ICE153
ICE163
ICE169
ICE173
ICE181
ICE1
ICE212
ICE213
ICE216
ICE21
ICE226
ICE228
ICE29
ICE33
ICE36
ICE49
ICE50
ICE60
ICE61
ICE63
ICE70
ICE71
ICE72
ICE73
ICE75
ICE79
ICE7
ICE91
ICE92
ICE93
ICE97
ICE98
Istisu-1
Kastel-1
Koch-1
Lag2.2
Leo-1
Ler-0
Ler-1
Lerik1-3
Nemrut-1
Mer-6
Nie1-2
Ped-0
Pra-6
Qui-0
Rue3-1-31
Sha
Star-8
TueSB30-3
Tuescha9
TueV13
TueWa1-2
Vash-1
Vie-0
WalhaesB4
Xan-1
Yeg-1

## Sheet: ST6
Supplemental Table 6. SNP mapping to exitron (EI) sequences in different Arabidopsis thaliana ecotypes
Gene_id	EI_coordinates	SNP_coordinate	Reference base	SNP location in EI	Ecotype|ecotype_base
AT1G01120	58705-58814	58736	G	SNP_EI	ICE107|A
AT1G01340	132893-133018	132898	G	SPLICE_SIGNAL_SNP	Del-10|A,Don-0|A,ICE107|A,ICE127|A,ICE130|A,ICE134|A,ICE150|A,ICE152|A,ICE153|A,ICE49|A,ICE50|A,ICE70|A,ICE71|A,ICE73|A,ICE75|A,Istisu-1|A,Ped-0|A,Sha|A
AT1G01340	132893-133018	132949	G	SNP_EI	Cdm-0|A
AT1G01340	132893-133018	133021	T	SNP_EI	Del-10|A,Don-0|A,ICE107|A,ICE127|A,ICE130|A,ICE134|A,ICE150|A,ICE152|A,ICE153|A,ICE49|A,ICE50|A,ICE70|A,ICE71|A,ICE73|A,ICE75|A,Istisu-1|A,Ped-0|A,Sha|A
AT1G01500	185406-185768	185428	G	SNP_EI	ICE226|A,ICE228|A,ICE79|A
AT1G01500	185406-185768	185481	T	SNP_EI	Bak-2|A,ICE169|A,ICE173|A,ICE212|A,ICE213|A,ICE33|A,ICE7|A,TueV13|A
AT1G01500	185406-185768	185509	G	SNP_EI	ICE73|T
AT1G01500	185406-185768	185599	G	SNP_EI	ICE60|T,ICE63|T
AT1G01500	185406-185768	185661	G	SNP_EI	Don-0|T,Ped-0|T
AT1G01500	185406-185768	185705	G	SNP_EI	Bak-2|A,ICE169|A,ICE173|A,ICE212|A,ICE213|A,ICE33|A,ICE79|A,ICE7|A,TueV13|A
AT1G01500	185406-185768	185783	T	SNP_EI	Agu-1|C,Bak-2|C,Bak-7|C,Cdm-0|C,Dog-4|C,Don-0|C,Ey15-2|C,HKT2.4|C,ICE102|C,ICE104|C,ICE106|C,ICE107|C,ICE111|C,ICE112|C,ICE119|C,ICE127|C,ICE130|C,ICE150|C,ICE152|C,ICE153|C,ICE163|C,ICE169|C,ICE173|C,ICE1|C,ICE212|C,ICE213|C,ICE216|C,ICE226|C,ICE228|C,ICE29|C,ICE33|C,ICE49|C,ICE50|C,ICE61|C,ICE71|C,ICE72|C,ICE79|C,ICE7|C,ICE91|C,ICE92|C,ICE93|C,ICE97|C,ICE98|C,Istisu-1|C,Kastel-1|C,Lag2.2|C,Leo-…
AT1G01830	299219-299304	299234	G	BP_SNP	ICE138|A
AT1G02000	346657-346858	346642	C	SNP_EI	ICE127|T,ICE130|T,Nemrut-1|T
AT1G02000	346718-346858	346711	C	SNP_EI	Ey15-2|T,ICE102|T,ICE106|T,ICE119|T,ICE92|T,Lag2.2|T,Mer-6|T,Nie1-2|T,WalhaesB4|T
AT1G02000	346718-346858	346712	G	SNP_EI	ICE75|A
AT1G02000	346718-346858	346726	C	SPLICE_SIGNAL_SNP	Agu-1|T,Ey15-2|T,ICE102|T,ICE104|T,ICE106|T,ICE112|T,ICE119|T,ICE49|T,ICE92|T,Lag2.2|T,Leo-1|T,Lerik1-3|T,Mer-6|T,Nie1-2|T,Vie-0|T,WalhaesB4|T
AT1G02000	346718-346858	346730	A	SNP_EI	ICE134|C
AT1G02000	346718-346858	346867	G	SNP_EI	ICE127|T,ICE130|T,Nemrut-1|T
AT1G02160	411253-411336	411330	T	SPLICE_SIGNAL_SNP	ICE138|C
AT1G02290	451023-451753	451027	T	SPLICE_SIGNAL_SNP	ICE1|G
AT1G02290	451023-451753	451070	G	SNP_EI	ICE1|C
AT1G02290	451023-451753	451133	A	SNP_EI	Cdm-0|C,Vie-0|C
AT1G02290	451023-451753	451215	G	SNP_EI	ICE119|C,ICE63|C,ICE98|C,Istisu-1|C
AT1G02290	451023-451753	451235	C	SNP_EI	Dog-4|A,ICE119|A,ICE63|A,ICE98|A,Istisu-1|A,Lag2.2|A,Vash-1|A,Yeg-1|A
AT1G02290	451023-451753	451253	G	SNP_EI	ICE29|A,ICE7|A
AT1G02290	451023-451753	451464	G	SNP_EI	Agu-1|C,Fei-0|C
AT1G02290	451023-451753	451476	T	SNP_EI	ICE1|C
AT1G02290	451023-451753	451640	G	SNP_EI	Bak-7|A,ICE1|A
AT1G02290	451023-451753	451663	C	SNP_EI	Cdm-0|A,ICE49|A,ICE50|A,Lerik1-3|A,Nie1-2|A,Vie-0|A,Xan-1|A
AT1G02290	451023-451753	451709	T	SNP_EI	Bak-7|C,ICE1|C
AT1G02290	451023-451753	451741	C	SNP_EI	Bak-7|A,ICE1|A
AT1G02630	561320-561453	561374	T	SNP_EI	ICE1|C
AT1G02850	631858-632009	631884	C	SNP_EI	ICE181|A
AT1G02850	631858-632009	631901	T	SNP_EI	Bak-7|C,Cdm-0|C,Ey15-2|C,Fei-0|C,ICE102|C,ICE104|C,ICE106|C,ICE107|C,ICE111|C,ICE112|C,ICE119|C,ICE120|C,ICE134|C,ICE1|C,ICE212|C,ICE213|C,ICE36|C,ICE63|C,ICE92|C,ICE97|C,ICE98|C,Istisu-1|C,Leo-1|C,Mer-6|C,Nie1-2|C,Qui-0|C,Star-8|C,Tuescha9|C,TueV13|C,TueWa1-2|C,Ler-1|C,Ler-0|C
AT1G03000	691756-691899	691771	A	SNP_EI	ICE49|G,ICE50|G
AT1G03000	691756-691899	691775	A	SNP_EI	Bak-2|G,Fei-0|G,HKT2.4|G,ICE169|G,ICE173|G,ICE1|G,ICE216|G,ICE33|G,ICE79|G,ICE97|G,Qui-0|G,TueSB30-3|G,TueV13|G,TueWa1-2|G,WalhaesB4|G,Yeg-1|G
AT1G03000	691756-691899	691899	C	BP_SNP	Agu-1|T,Pra-6|T,Vie-0|T
AT1G03040	706315-706433	706359	A	SNP_EI	Bak-2|G
AT1G03040	706315-706433	706374	A	SNP_EI	ICE73|T
AT1G03040	706315-706433	706380	G	SNP_EI	ICE60|A
AT1G03220	787419-787862	787421	T	BP_SNP	Bak-7|C
AT1G03220	787419-787862	787435	G	SNP_EI	Bak-7|C
AT1G03220	787419-787862	787445	A	SNP_EI	Bak-7|T
AT1G03220	787419-787862	787511	T	SNP_EI	Bak-7|C
AT1G03220	787419-787862	787514	C	SNP_EI	Agu-1|G,Don-0|G,Fei-0|G,ICE102|G,ICE111|G,ICE138|G,ICE163|G,ICE212|G,ICE213|G,ICE226|G,ICE228|G,ICE49|G,ICE50|G,Ped-0|G,Pra-6|G,Vie-0|G
AT1G03220	787419-787862	787515	G	SNP_EI	Agu-1|A,Don-0|A,Fei-0|A,ICE102|A,ICE111|A,ICE138|A,ICE163|A,ICE212|A,ICE213|A,ICE226|A,ICE228|A,ICE49|A,ICE50|A,Ped-0|A,Pra-6|A,Vie-0|A
AT1G03220	787419-787862	787576	C	SNP_EI	ICE138|A
AT1G03220	787419-787862	787586	C	SNP_EI	Agu-1|T,Don-0|T,Fei-0|T,ICE102|T,ICE111|T,ICE138|T,ICE212|T,ICE213|T,ICE226|T,ICE228|T,ICE49|T,ICE50|T,Ped-0|T,Pra-6|T,Vie-0|T
AT1G03220	787419-787862	787587	A	SNP_EI	Agu-1|C,Bak-7|C,Cdm-0|C,Dog-4|C,Don-0|C,Fei-0|C,HKT2.4|C,ICE102|C,ICE104|C,ICE106|C,ICE107|C,ICE111|C,ICE119|C,ICE120|C,ICE138|C,ICE163|C,ICE169|C,ICE173|C,ICE212|C,ICE213|C,ICE216|C,ICE226|C,ICE228|C,ICE29|C,ICE33|C,ICE49|C,ICE50|C,ICE60|C,ICE63|C,ICE70|C,ICE72|C,ICE75|C,ICE79|C,ICE7|C,ICE91|C,ICE92|C,ICE93|C,ICE97|C,ICE98|C,Kastel-1|C,Koch-1|C,Leo-1|C,Nemrut-1|C,Mer-6|C,Nie1-2|C,Ped-0|C,Pra-6|C…
AT1G03220	787419-787862	787617	G	SNP_EI	Istisu-1|A,Lerik1-3|A,Xan-1|A
AT1G03220	787419-787862	787659	A	SNP_EI	Don-0|G,Ped-0|G
AT1G03220	787419-787862	787673	G	SNP_EI	Don-0|T,Vie-0|T
AT1G03220	787419-787862	787697	T	SNP_EI	Agu-1|C,Bak-7|C,Fei-0|C,ICE111|C,ICE212|C,ICE226|C,ICE49|C
AT1G03220	787419-787862	787763	T	SNP_EI	Bak-2|C,Cdm-0|C,Dog-4|C,HKT2.4|C,ICE104|C,ICE106|C,ICE107|C,ICE112|C,ICE119|C,ICE120|C,ICE127|C,ICE130|C,ICE134|C,ICE150|C,ICE152|C,ICE153|C,ICE163|C,ICE169|C,ICE173|C,ICE181|C,ICE1|C,ICE216|C,ICE29|C,ICE33|C,ICE36|C,ICE60|C,ICE61|C,ICE63|C,ICE70|C,ICE71|C,ICE72|C,ICE73|C,ICE75|C,ICE79|C,ICE7|C,ICE91|C,ICE92|C,ICE93|C,ICE97|C,ICE98|C,Istisu-1|C,Kastel-1|C,Koch-1|C,Lag2.2|C,Leo-1|C,Lerik1-3|C,Nemr…
AT1G03220	787419-787862	787805	T	SNP_EI	Agu-1|C,Bak-7|C,Don-0|C,Fei-0|C,ICE102|C,ICE111|C,ICE138|C,ICE212|C,ICE213|C,ICE226|C,ICE228|C,ICE49|C,ICE50|C,ICE70|C,ICE72|C,ICE75|C,Koch-1|C,Ped-0|C,Pra-6|C,Vie-0|C,Yeg-1|C
AT1G03220	787419-787862	787811	A	SNP_EI	Agu-1|G,Bak-7|G,Don-0|G,Fei-0|G,ICE102|G,ICE111|G,ICE138|G,ICE212|G,ICE213|G,ICE226|G,ICE228|G,ICE49|G,ICE50|G,ICE70|G,ICE72|G,ICE75|G,Koch-1|G,Ped-0|G,Pra-6|G,Vie-0|G,Yeg-1|G
AT1G03220	787419-787862	787841	C	SNP_EI	Agu-1|G,Bak-7|G,Don-0|G,Fei-0|G,ICE102|G,ICE111|G,ICE138|G,ICE212|G,ICE213|G,ICE226|G,ICE228|G,ICE49|G,ICE50|G,ICE70|G,ICE72|G,ICE75|G,Koch-1|G,Ped-0|G,Pra-6|G,Vie-0|G,Yeg-1|G
AT1G03350	823581-824012	823582	C	SPLICE_SITE_SNP	Fei-0|A,ICE104|A,ICE107|A,ICE50|A,ICE93|A
AT1G03350	823581-824012	823647	A	SNP_EI	Dog-4|T
AT1G03350	823581-824012	823665	T	SNP_EI	ICE212|C,ICE213|C
AT1G03350	823581-824012	823677	C	SNP_EI	ICE29|A,ICE7|A
AT1G03350	823581-824012	823687	C	SNP_EI	Bak-7|T,Cdm-0|T,Dog-4|T,Don-0|T,Ey15-2|T,Fei-0|T,HKT2.4|T,ICE102|T,ICE104|T,ICE106|T,ICE107|T,ICE111|T,ICE138|T,ICE169|T,ICE173|T,ICE212|T,ICE213|T,ICE216|T,ICE29|T,ICE36|T,ICE50|T,ICE60|T,ICE79|T,ICE7|T,ICE92|T,ICE93|T,ICE98|T,Istisu-1|T,Kastel-1|T,Leo-1|T,Lerik1-3|T,Nemrut-1|T,Mer-6|T,Nie1-2|T,Ped-0|T,Qui-0|T,Rue3-1-31|T,TueSB30-3|T,Tuescha9|T,TueV13|T,TueWa1-2|T,WalhaesB4|T,Xan-1|T
AT1G03350	823581-824012	823879	G	SNP_EI	ICE104|A
AT1G03350	823581-824012	823967	C	SNP_EI	Vash-1|G
AT1G03350	823581-824012	823977	C	SNP_EI	ICE138|G,ICE36|G,ICE60|G,Kastel-1|G,Rue3-1-31|G
AT1G03830	962649-962746	962728	T	SNP_EI	Agu-1|C
AT1G04300	1152947-1153036	1152937	C	SNP_EI	ICE7|A
AT1G04300	1152947-1153036	1152962	G	SNP_EI	ICE212|A,ICE213|A,Pra-6|A
AT1G04300	1152947-1153036	1152983	G	SNP_EI	ICE181|C
AT1G04300	1152947-1153036	1153006	C	SNP_EI	Bak-2|G
AT1G04300	1152947-1153036	1153011	C	SNP_EI	ICE107|T
AT1G04300	1152947-1153036	1153021	G	SNP_EI	ICE21|A
AT1G04300	1152947-1153036	1153026	T	SPLICE_SIGNAL_SNP	ICE50|A,Ped-0|A
AT1G04945	1402520-1402623	1402552	A	SNP_EI	ICE134|G
AT1G06000	1820887-1820954	1820903	A	BP_SNP	Bak-2|G,Bak-7|G,Lag2.2|G
AT1G06000	1820887-1820954	1820969	T	SNP_EI	ICE153|C
AT1G06190	1892919-1893434	1892934	C	SNP_EI	ICE153|A,ICE49|A,ICE63|A,Pra-6|A
AT1G06190	1892919-1893434	1892959	T	SNP_EI	ICE102|A,ICE119|A,ICE120|A,ICE33|A,ICE93|A
AT1G06190	1892919-1893434	1892983	T	SNP_EI	Don-0|A,ICE153|A,ICE49|A,ICE50|A,ICE63|A,Ped-0|A,Pra-6|A,Vie-0|A
AT1G06190	1892919-1893434	1893010	A	SNP_EI	ICE153|C
AT1G06190	1892919-1893434	1893083	C	SNP_EI	Don-0|T,ICE153|T,ICE49|T,ICE50|T,ICE63|T,Ped-0|T,Pra-6|T,Vie-0|T
AT1G06190	1892919-1893434	1893175	T	SNP_EI	Don-0|A,ICE153|A,ICE49|A,ICE50|A,ICE63|A,Ped-0|A,Pra-6|A,Vie-0|A
AT1G06190	1892919-1893434	1893202	A	SNP_EI	ICE111|G,ICE98|G,Kastel-1|G
AT1G06190	1892919-1893434	1893373	G	SNP_EI	ICE49|A,ICE63|A,Pra-6|A
AT1G06190	1892919-1893434	1893374	T	SNP_EI	Cdm-0|C,ICE104|C,ICE107|C,ICE112|C,ICE91|C,Mer-6|C
AT1G06190	1892919-1893434	1893390	T	SNP_EI	Ler-1|C
AT1G06190	1892919-1893434	1893391	T	SNP_EI	Cdm-0|C,Dog-4|C,ICE104|C,ICE107|C,ICE111|C,ICE112|C,ICE127|C,ICE130|C,ICE134|C,ICE138|C,ICE150|C,ICE152|C,ICE163|C,ICE169|C,ICE173|C,ICE226|C,ICE228|C,ICE36|C,ICE61|C,ICE70|C,ICE71|C,ICE72|C,ICE73|C,ICE75|C,ICE7|C,ICE91|C,ICE98|C,Kastel-1|C,Koch-1|C,Nemrut-1|C,Mer-6|C,Sha|C,Yeg-1|C,Ler-0|C
AT1G06190	1892919-1893434	1893404	C	SNP_EI	Dog-4|G
AT1G06190	1892919-1893434	1893427	A	SPLICE_SIGNAL_SNP	Don-0|G
AT1G06580	2014969-2015095	2014999	A	SNP_EI	Ler-1|T
AT1G06580	2014969-2015095	2015000	A	SNP_EI	Agu-1|T,Bak-2|T,Bak-7|T,Cdm-0|T,Del-10|T,Dog-4|T,Don-0|T,Ey15-2|T,Fei-0|T,HKT2.4|T,ICE102|T,ICE104|T,ICE106|T,ICE107|T,ICE111|T,ICE112|T,ICE119|T,ICE120|T,ICE127|T,ICE130|T,ICE134|T,ICE138|T,ICE150|T,ICE152|T,ICE153|T,ICE163|T,ICE169|T,ICE173|T,ICE181|T,ICE1|T,ICE212|T,ICE213|T,ICE216|T,ICE21|T,ICE226|T,ICE228|T,ICE29|T,ICE33|T,ICE36|T,ICE49|T,ICE50|T,ICE60|T,ICE61|T,ICE63|T,ICE70|T,ICE71|T,ICE72…
AT1G06580	2014969-2015095	2015052	G	SNP_EI	Dog-4|A
AT1G06580	2014969-2015095	2015058	A	SNP_EI	Ler-1|T
AT1G06580	2014969-2015095	2015059	A	SNP_EI	Agu-1|T,Bak-2|T,Bak-7|T,Cdm-0|T,Del-10|T,Dog-4|T,Don-0|T,Ey15-2|T,Fei-0|T,HKT2.4|T,ICE104|T,ICE106|T,ICE107|T,ICE112|T,ICE119|T,ICE127|T,ICE130|T,ICE134|T,ICE138|T,ICE150|T,ICE152|T,ICE153|T,ICE163|T,ICE169|T,ICE173|T,ICE181|T,ICE212|T,ICE213|T,ICE216|T,ICE21|T,ICE226|T,ICE228|T,ICE29|T,ICE36|T,ICE49|T,ICE50|T,ICE60|T,ICE61|T,ICE63|T,ICE70|T,ICE71|T,ICE72|T,ICE73|T,ICE75|T,ICE79|T,ICE7|T,ICE91|T,…
AT1G06580	2014969-2015095	2015079	T	SNP_EI	Ler-1|G
AT1G06580	2014969-2015095	2015080	T	SNP_EI	Agu-1|G,Bak-2|G,Bak-7|G,Cdm-0|G,Del-10|G,Dog-4|G,Ey15-2|G,Fei-0|G,HKT2.4|G,ICE104|G,ICE106|G,ICE107|G,ICE112|G,ICE119|G,ICE130|G,ICE134|G,ICE138|G,ICE153|G,ICE163|G,ICE169|G,ICE173|G,ICE181|G,ICE212|G,ICE213|G,ICE216|G,ICE21|G,ICE226|G,ICE228|G,ICE29|G,ICE36|G,ICE49|G,ICE50|G,ICE60|G,ICE63|G,ICE71|G,ICE75|G,ICE79|G,ICE7|G,ICE91|G,ICE92|G,ICE93|G,ICE97|G,ICE98|G,Istisu-1|G,Kastel-1|G,Lag2.2|G,Leo-…
AT1G06850	2106246-2106354	2106259	C	SNP_EI	Pra-6|T
AT1G06850	2106246-2106354	2106318	C	SNP_EI	ICE127|T,ICE134|T,ICE138|T,ICE150|T,ICE152|T,ICE61|T,ICE70|T,ICE72|T,ICE73|T,ICE75|T,Koch-1|T,Nemrut-1|T,Sha|T,Yeg-1|T
AT1G06850	2106246-2106354	2106333	A	SNP_EI	ICE63|G,Istisu-1|G,Lerik1-3|G,Vash-1|G,Xan-1|G
AT1G06850	2106246-2106354	2106338	C	SNP_EI	Ler-1|G
AT1G06850	2106246-2106354	2106339	C	SNP_EI	Del-10|G,Don-0|G,Ey15-2|G,Fei-0|G,HKT2.4|G,ICE102|G,ICE111|G,ICE127|G,ICE130|G,ICE134|G,ICE138|G,ICE150|G,ICE152|G,ICE153|G,ICE163|G,ICE169|G,ICE173|G,ICE181|G,ICE212|G,ICE213|G,ICE216|G,ICE21|G,ICE226|G,ICE228|G,ICE33|G,ICE49|G,ICE50|G,ICE60|G,ICE61|G,ICE70|G,ICE71|G,ICE72|G,ICE73|G,ICE75|G,ICE79|G,ICE7|G,ICE97|G,Kastel-1|G,Koch-1|G,Nemrut-1|G,Ped-0|G,Qui-0|G,Sha|G,TueSB30-3|G,WalhaesB4|G,Yeg-1|…
AT1G07240	2224305-2224824	2224435	A	SNP_EI	ICE169|C,ICE173|C,ICE36|C,ICE63|C
AT1G07240	2224305-2224824	2224529	G	SNP_EI	Bak-7|A
AT1G07240	2224305-2224824	2224573	G	SNP_EI	ICE107|A
AT1G07240	2224305-2224824	2224606	G	SNP_EI	ICE104|A
AT1G07240	2224305-2224824	2224669	C	SNP_EI	Don-0|T
AT1G07240	2224305-2224824	2224808	A	SNP_EI	ICE163|T,ICE79|T,Leo-1|T
AT1G07520	2310406-2311355	2310405	A	SPLICE_SIGNAL_SNP	Don-0|G
AT1G07520	2310406-2311355	2310443	G	SNP_EI	ICE36|C
AT1G07520	2310406-2311355	2310507	A	SNP_EI	Ler-1|G
AT1G07520	2310406-2311355	2310510	A	SNP_EI	Agu-1|G,Bak-2|G,Cdm-0|G,Dog-4|G,Don-0|G,Ey15-2|G,Fei-0|G,HKT2.4|G,ICE102|G,ICE104|G,ICE106|G,ICE107|G,ICE111|G,ICE112|G,ICE119|G,ICE120|G,ICE127|G,ICE130|G,ICE134|G,ICE138|G,ICE153|G,ICE163|G,ICE1|G,ICE212|G,ICE213|G,ICE216|G,ICE21|G,ICE226|G,ICE228|G,ICE29|G,ICE33|G,ICE49|G,ICE60|G,ICE61|G,ICE63|G,ICE70|G,ICE71|G,ICE73|G,ICE75|G,ICE79|G,ICE7|G,ICE91|G,ICE92|G,ICE93|G,ICE97|G,ICE98|G,Istisu-1|G,K…
AT1G07520	2310406-2311355	2310543	G	SNP_EI	Ped-0|C
AT1G07520	2310406-2311355	2310594	C	SNP_EI	Kastel-1|T
AT1G07520	2310406-2311355	2310636	T	SNP_EI	ICE153|C
AT1G07520	2310406-2311355	2310877	C	SNP_EI	Don-0|T
AT1G07520	2310406-2311355	2310929	C	SNP_EI	ICE120|T
AT1G07520	2310406-2311355	2311247	C	SNP_EI	ICE153|T
AT1G07520	2310406-2311355	2311250	T	SNP_EI	ICE150|A,ICE152|A,Sha|A
AT1G07520	2310406-2311355	2311274	C	SNP_EI	ICE49|G
AT1G07590	2337074-2337483	2337123	T	SNP_EI	ICE50|C
AT1G07590	2337074-2337483	2337129	A	SNP_EI	ICE36|T
AT1G07590	2337074-2337483	2337145	T	SNP_EI	Agu-1|C
AT1G07590	2337074-2337483	2337222	T	SNP_EI	Istisu-1|G,Lag2.2|G,Lerik1-3|G,Vash-1|G,Xan-1|G
AT1G07590	2337074-2337483	2337252	C	SNP_EI	Agu-1|T
AT1G07590	2337074-2337483	2337258	T	SNP_EI	Agu-1|G
AT1G07590	2337074-2337483	2337277	G	SNP_EI	Agu-1|A
AT1G07590	2337074-2337483	2337285	T	SNP_EI	Agu-1|C
AT1G07590	2337074-2337483	2337291	T	SNP_EI	HKT2.4|C,ICE106|C,ICE112|C,ICE120|C,ICE150|C,ICE152|C,ICE29|C,ICE60|C,ICE61|C,ICE70|C,ICE72|C,ICE75|C,ICE91|C,ICE92|C,ICE93|C,Koch-1|C,Leo-1|C,Sha|C
AT1G07590	2337074-2337483	2337303	C	SNP_EI	Bak-2|T,Bak-7|T,Yeg-1|T
AT1G07590	2337074-2337483	2337333	C	SNP_EI	Agu-1|T
AT1G07590	2337074-2337483	2337348	T	SNP_EI	Agu-1|A,Fei-0|A,ICE104|A,ICE107|A,Nie1-2|A,Tuescha9|A
AT1G07590	2337074-2337483	2337353	T	SNP_EI	Agu-1|C
AT1G07590	2337074-2337483	2337356	A	SNP_EI	Agu-1|C
AT1G07590	2337074-2337483	2337372	G	SNP_EI	Agu-1|A,ICE153|T,ICE49|T,ICE50|T
AT1G07590	2337074-2337483	2337384	T	SNP_EI	Agu-1|C
AT1G07590	2337074-2337483	2337426	T	SNP_EI	ICE102|C
AT1G07590	2337074-2337483	2337438	C	SNP_EI	Agu-1|A
AT1G07590	2337074-2337483	2337481	G	BP_SNP	ICE97|C,Pra-6|C
AT1G07615	2342647-2343094	2342727	G	SNP_EI	Bak-2|A,Bak-7|A,Don-0|A,ICE104|A,ICE107|A,ICE111|A,ICE153|A,Ped-0|A,Yeg-1|A
AT1G07615	2342647-2343094	2342760	G	SNP_EI	Bak-2|A,Bak-7|A,Don-0|A,ICE104|A,ICE107|A,ICE111|A,ICE153|A,Ped-0|A,Yeg-1|A
AT1G07615	2342647-2343094	2342765	G	SNP_EI	ICE163|A,ICE36|A,ICE98|A
AT1G07615	2342647-2343094	2342814	C	SNP_EI	Cdm-0|A,Del-10|A,HKT2.4|A,ICE106|A,ICE112|A,ICE119|A,ICE163|A,ICE216|A,ICE33|A,ICE36|A,ICE91|A,ICE92|A,ICE93|A,ICE97|A,ICE98|A,Istisu-1|A,Lag2.2|A,Lerik1-3|A,Mer-6|A,Pra-6|A,Qui-0|A,TueSB30-3|A,TueWa1-2|A,Vash-1|A,Xan-1|A
AT1G07615	2342647-2343094	2342850	G	SNP_EI	ICE150|A,ICE152|A,ICE63|A,ICE73|A,Sha|A
AT1G07615	2342647-2343094	2342903	T	SNP_EI	Cdm-0|C,ICE119|C,Mer-6|C
AT1G07615	2342647-2343094	2342937	G	SNP_EI	Leo-1|A
AT1G07615	2342647-2343094	2343081	G	SNP_EI	Agu-1|C,Bak-2|C,Bak-7|C,Dog-4|C,Don-0|C,ICE104|C,ICE107|C,ICE111|C,ICE127|C,ICE134|C,ICE153|C,ICE163|C,ICE1|C,ICE212|C,ICE213|C,ICE21|C,ICE49|C,ICE50|C,ICE71|C,Kastel-1|C,Nemrut-1|C,Ped-0|C,TueV13|C,Vie-0|C,Yeg-1|C
AT1G07615	2342647-2343094	2343083	C	SNP_EI	ICE181|T
AT1G08070	2516314-2516395	2516323	T	BP_SNP	Ler-1|C
AT1G08070	2516314-2516395	2516326	T	BP_SNP	Agu-1|C,Bak-7|C,Del-10|C,Dog-4|C,Don-0|C,Ey15-2|C,Fei-0|C,HKT2.4|C,ICE106|C,ICE107|C,ICE120|C,ICE127|C,ICE130|C,ICE134|C,ICE138|C,ICE150|C,ICE152|C,ICE153|C,ICE163|C,ICE169|C,ICE173|C,ICE181|C,ICE212|C,ICE213|C,ICE21|C,ICE226|C,ICE228|C,ICE36|C,ICE49|C,ICE50|C,ICE60|C,ICE61|C,ICE63|C,ICE70|C,ICE71|C,ICE72|C,ICE73|C,ICE75|C,ICE91|C,ICE92|C,ICE98|C,Istisu-1|C,Kastel-1|C,Koch-1|C,Lag2.2|C,Lerik1-3|C…
AT1G08070	2516314-2516395	2516397	A	SPLICE_SIGNAL_SNP	Bak-7|C,Del-10|C,Dog-4|C,Ey15-2|C,HKT2.4|C,ICE127|C,ICE150|C,ICE152|C,ICE169|C,ICE173|C,ICE21|C,ICE36|C,ICE61|C,ICE63|C,ICE71|C,ICE72|C,ICE73|C,ICE98|C,Istisu-1|C,Kastel-1|C,Koch-1|C,Lag2.2|C,Lerik1-3|C,Nie1-2|C,Sha|C,Tuescha9|C,Vash-1|C,Xan-1|C,Yeg-1|C
AT1G08550	2708417-2708637	2708465	T	SNP_EI	Bak-7|C,Cdm-0|C,Don-0|C,Fei-0|C,HKT2.4|C,ICE102|C,ICE104|C,ICE106|C,ICE107|C,ICE111|C,ICE112|C,ICE119|C,ICE120|C,ICE127|C,ICE130|C,ICE134|C,ICE138|C,ICE150|C,ICE152|C,ICE181|C,ICE226|C,ICE228|C,ICE29|C,ICE33|C,ICE49|C,ICE50|C,ICE60|C,ICE71|C,ICE72|C,ICE7|C,ICE91|C,ICE92|C,ICE93|C,ICE97|C,ICE98|C,Istisu-1|C,Kastel-1|C,Lag2.2|C,Leo-1|C,Lerik1-3|C,Nemrut-1|C,Mer-6|C,Nie1-2|C,Ped-0|C,Pra-6|C,Rue3-1-3…
AT1G08570	2713142-2713236	2713161	G	SNP_EI	Ey15-2|T,TueSB30-3|T
AT1G08570	2713142-2713236	2713241	T	SNP_EI	ICE130|G,ICE29|G
AT1G08570	2713142-2713236	2713245	G	SNP_EI	Don-0|A
AT1G09070	2928355-2928419	2928356	A	SPLICE_SITE_SNP	Agu-1|G,Bak-2|G,Bak-7|G,Cdm-0|G,Del-10|G,Dog-4|G,Don-0|G,Ey15-2|G,Fei-0|G,HKT2.4|G,ICE102|G,ICE104|G,ICE106|G,ICE107|G,ICE111|G,ICE112|G,ICE119|G,ICE120|G,ICE127|G,ICE130|G,ICE134|G,ICE138|G,ICE150|G,ICE152|G,ICE153|G,ICE163|G,ICE169|G,ICE173|G,ICE181|G,ICE1|G,ICE212|G,ICE213|G,ICE216|G,ICE21|G,ICE226|G,ICE228|G,ICE29|G,ICE33|G,ICE36|G,ICE49|G,ICE50|G,ICE60|G,ICE61|G,ICE63|G,ICE70|G,ICE71|G,ICE72…
AT1G09070	2928355-2928419	2928359	A	SPLICE_SIGNAL_SNP	Ler-1|G
AT1G09070	2928381-2928562	2928566	C	SNP_EI	TueSB30-3|G
AT1G09070	2928406-2928524	2928438	G	SNP_EI	Yeg-1|A
AT1G09070	2928406-2928524	2928452	G	SNP_EI	Bak-2|T,Del-10|T,Dog-4|T,Don-0|T,Ey15-2|T,ICE127|T,ICE130|T,ICE134|T,ICE138|T,ICE153|T,ICE163|T,ICE181|T,ICE212|T,ICE213|T,ICE226|T,ICE228|T,ICE60|T,ICE61|T,ICE71|T,ICE72|T,ICE73|T,ICE79|T,ICE7|T,Koch-1|T,Sha|T,TueSB30-3|T,Tuescha9|T,WalhaesB4|T
AT1G09470	3055890-3055977	3055912	G	SNP_EI	ICE61|A,ICE71|A
AT1G09470	3055890-3055977	3055950	A	SNP_EI	ICE138|G
AT1G09470	3055890-3055977	3055958	C	SNP_EI	Bak-2|T
AT1G09650	3126600-3126768	3126605	G	BP_SNP	Bak-2|A,ICE98|A
AT1G09650	3126600-3126768	3126626	A	SNP_EI	Bak-2|C,Bak-7|C,Cdm-0|C,Don-0|C,HKT2.4|C,ICE104|C,ICE106|C,ICE112|C,ICE127|C,ICE153|C,ICE212|C,ICE213|C,ICE21|C,ICE226|C,ICE228|C,ICE29|C,ICE33|C,ICE36|C,ICE49|C,ICE50|C,ICE60|C,ICE61|C,ICE70|C,ICE71|C,ICE72|C,ICE75|C,ICE79|C,ICE92|C,ICE98|C,Kastel-1|C,Leo-1|C,Nemrut-1|C,Mer-6|C,Ped-0|C,Rue3-1-31|C,Sha|C,TueSB30-3|C,Tuescha9|C,WalhaesB4|C,Ler-0|C
AT1G09650	3126600-3126768	3126628	A	SNP_EI	Ler-1|C
AT1G09650	3126600-3126768	3126642	C	SNP_EI	Don-0|T
AT1G09650	3126600-3126768	3126649	T	SNP_EI	Agu-1|C,Fei-0|C,ICE102|C,ICE120|C,ICE181|C,ICE216|C,ICE97|C,Pra-6|C,Qui-0|C,Star-8|C
AT1G09650	3126600-3126768	3126650	G	SNP_EI	Agu-1|C,Fei-0|C,ICE102|C,ICE120|C,ICE181|C,ICE216|C,ICE97|C,Pra-6|C,Qui-0|C,Star-8|C
AT1G09650	3126600-3126768	3126734	C	SNP_EI	ICE212|T,ICE213|T,ICE226|T,ICE228|T,ICE79|T
AT1G09650	3126600-3126768	3126754	C	SNP_EI	Bak-7|T,ICE29|T
AT1G09650	3126600-3126768	3126778	T	SNP_EI	Ey15-2|A
AT1G10330	3389773-3389862	3389802	C	SNP_EI	Cdm-0|T,Ey15-2|T,Fei-0|T,ICE102|T,ICE111|T,ICE112|T,ICE120|T,ICE1|T,ICE60|T,ICE79|T,ICE7|T,ICE97|T,ICE98|T,Leo-1|T,Mer-6|T,Qui-0|T,Tuescha9|T,TueV13|T,TueWa1-2|T
AT1G10330	3389773-3389862	3389829	A	SNP_EI	Cdm-0|G,Ey15-2|G,Fei-0|G,ICE102|G,ICE111|G,ICE112|G,ICE120|G,ICE1|G,ICE60|G,ICE79|G,ICE7|G,ICE97|G,ICE98|G,Leo-1|G,Mer-6|G,Qui-0|G,Tuescha9|G,TueV13|G,TueWa1-2|G
AT1G10330	3389773-3389862	3389842	G	SNP_EI	Cdm-0|A,Ey15-2|A,Fei-0|A,ICE102|A,ICE111|A,ICE112|A,ICE120|A,ICE1|A,ICE60|A,ICE97|A,ICE98|A,Leo-1|A,Mer-6|A,Tuescha9|A,TueV13|A,TueWa1-2|A
AT1G10410	3417530-3417618	3417528	T	SPLICE_SIGNAL_SNP	ICE60|A
AT1G10990	3670901-3670980	3670916	T	BP_SNP	Agu-1|A,Bak-2|A,Bak-7|A,Cdm-0|A,Dog-4|A,Don-0|A,Ey15-2|A,Fei-0|A,ICE102|A,ICE104|A,ICE106|A,ICE107|A,ICE111|A,ICE112|A,ICE119|A,ICE120|A,ICE127|A,ICE130|A,ICE134|A,ICE138|A,ICE150|A,ICE152|A,ICE153|A,ICE169|A,ICE173|A,ICE181|A,ICE1|A,ICE212|A,ICE213|A,ICE216|A,ICE21|A,ICE226|A,ICE228|A,ICE29|A,ICE33|A,ICE36|A,ICE49|A,ICE50|A,ICE60|A,ICE61|A,ICE70|A,ICE71|A,ICE72|A,ICE73|A,ICE75|A,ICE79|A,ICE7|A,I…
AT1G10990	3670901-3670980	3670937	A	SNP_EI	Agu-1|G,Cdm-0|G,Fei-0|G,ICE104|G,ICE106|G,ICE107|G,ICE112|G,ICE119|G,ICE120|G,ICE134|G,ICE150|G,ICE152|G,ICE169|G,ICE173|G,ICE1|G,ICE216|G,ICE21|G,ICE226|G,ICE33|G,ICE50|G,ICE60|G,ICE61|G,ICE73|G,ICE75|G,ICE79|G,ICE91|G,ICE93|G,ICE97|G,ICE98|G,Istisu-1|G,Kastel-1|G,Koch-1|G,Lag2.2|G,Leo-1|G,Mer-6|G,Qui-0|G,Rue3-1-31|G,TueSB30-3|G,Tuescha9|G,Vash-1|G,Vie-0|G,Xan-1|G,Yeg-1|G,Ler-1|G,Ler-0|G
AT1G10990	3670901-3670980	3670938	G	SNP_EI	Agu-1|A,Cdm-0|A,Fei-0|A,ICE104|A,ICE106|A,ICE107|A,ICE112|A,ICE119|A,ICE120|A,ICE134|A,ICE150|A,ICE152|A,ICE169|A,ICE173|A,ICE1|A,ICE216|A,ICE21|A,ICE226|A,ICE33|A,ICE50|A,ICE60|A,ICE61|A,ICE73|A,ICE75|A,ICE79|A,ICE91|A,ICE93|A,ICE97|A,ICE98|A,Istisu-1|A,Kastel-1|A,Koch-1|A,Lag2.2|A,Leo-1|A,Mer-6|A,Qui-0|A,Rue3-1-31|A,TueSB30-3|A,Tuescha9|A,Vash-1|A,Vie-0|A,Xan-1|A,Yeg-1|A,Ler-1|A,Ler-0|A
AT1G10990	3670901-3670980	3670954	C	SNP_EI	ICE50|A
AT1G11300	3800444-3800529	3800441	A	SNP_EI	ICE60|T,Nie1-2|T,Yeg-1|T
AT1G11300	3800444-3800529	3800442	A	SPLICE_SIGNAL_SNP	ICE102|C
AT1G11300	3800444-3800529	3800474	C	SNP_EI	Fei-0|A,ICE97|A,ICE98|A
AT1G11410	3841455-3841704	3841513	T	SNP_EI	ICE127|C,ICE130|C,ICE134|C,ICE138|C,ICE70|C,ICE71|C,ICE73|C,Sha|C
AT1G11410	3841455-3841704	3841523	C	SNP_EI	ICE33|A
AT1G11410	3841455-3841704	3841691	G	SNP_EI	Istisu-1|A,Lerik1-3|A
AT1G11680	3939753-3939931	3939760	C	SPLICE_SIGNAL_SNP	Dog-4|T,ICE107|T,ICE150|T,ICE152|T,ICE33|T,ICE92|T,Lag2.2|T,Nemrut-1|T,Rue3-1-31|T,TueSB30-3|T,Xan-1|T
AT1G11680	3939753-3939931	3939859	G	SNP_EI	ICE112|A
AT1G11700	3945861-3946174	3945940	C	SNP_EI	Dog-4|T,Don-0|T,ICE102|T,ICE104|T,ICE107|T,ICE163|T,ICE181|T,ICE226|T,ICE228|T,ICE33|T,ICE61|T,ICE75|T,ICE79|T,Lag2.2|T,Nemrut-1|T,Ped-0|T
AT1G11700	3945861-3946174	3945983	C	SNP_EI	Dog-4|T,Don-0|T,ICE102|T,ICE104|T,ICE107|T,ICE163|T,ICE181|T,ICE226|T,ICE228|T,ICE33|T,ICE61|T,ICE75|T,ICE79|T,Lag2.2|T,Nemrut-1|T,Ped-0|T
AT1G11700	3945861-3946174	3946042	C	SNP_EI	ICE119|T,ICE150|T,ICE152|T,ICE92|T,Rue3-1-31|T,TueSB30-3|T
AT1G11700	3945861-3946174	3946079	G	SNP_EI	Del-10|T,Dog-4|T,Don-0|T,ICE102|T,ICE104|T,ICE107|T,ICE127|T,ICE130|T,ICE134|T,ICE138|T,ICE163|T,ICE181|T,ICE226|T,ICE228|T,ICE33|T,ICE36|T,ICE49|T,ICE50|T,ICE60|T,ICE61|T,ICE63|T,ICE70|T,ICE71|T,ICE72|T,ICE73|T,ICE75|T,ICE79|T,ICE97|T,ICE98|T,Koch-1|T,Lag2.2|T,Nemrut-1|T,Ped-0|T,Sha|T,Star-8|T,Yeg-1|T
AT1G11700	3945861-3946174	3946094	C	SNP_EI	Dog-4|T,Don-0|T,ICE102|T,ICE104|T,ICE107|T,ICE163|T,ICE181|T,ICE226|T,ICE228|T,ICE33|T,ICE61|T,ICE75|T,ICE79|T,Lag2.2|T,Nemrut-1|T,Ped-0|T
AT1G11700	3945861-3946174	3946097	G	SNP_EI	ICE107|C
AT1G11700	3945861-3946174	3946154	T	SNP_EI	Dog-4|C,Don-0|C,ICE102|C,ICE104|C,ICE107|C,ICE181|C,ICE226|C,ICE228|C,ICE33|C,ICE61|C,ICE75|C,ICE79|C,Lag2.2|C,Nemrut-1|C,Ped-0|C
AT1G11700	3945861-3946174	3946160	A	SNP_EI	Dog-4|T,Don-0|T,ICE102|T,ICE104|T,ICE107|T,ICE163|T,ICE181|T,ICE226|T,ICE228|T,ICE33|T,ICE61|T,ICE75|T,ICE79|T,Lag2.2|T,Nemrut-1|T,Ped-0|T
AT1G11700	3945861-3946174	3946171	G	SPLICE_SIGNAL_SNP	Dog-4|A,Don-0|A,ICE102|A,ICE104|A,ICE107|A,ICE181|A,ICE226|A,ICE228|A,ICE33|A,ICE61|A,ICE75|A,ICE79|A,Lag2.2|A,Nemrut-1|A,Ped-0|A
AT1G11770	3976467-3976529	3976469	T	SPLICE_SITE_SNP	Agu-1|A,Bak-2|A,Bak-7|A,Cdm-0|A,Del-10|A,Dog-4|A,Don-0|A,Ey15-2|A,Fei-0|A,HKT2.4|A,ICE102|A,ICE104|A,ICE106|A,ICE107|A,ICE111|A,ICE112|A,ICE119|A,ICE120|A,ICE127|A,ICE130|A,ICE134|A,ICE138|A,ICE150|A,ICE152|A,ICE153|A,ICE163|A,ICE169|A,ICE173|A,ICE181|A,ICE1|A,ICE216|A,ICE21|A,ICE226|A,ICE228|A,ICE29|A,ICE33|A,ICE36|A,ICE49|A,ICE50|A,ICE60|A,ICE61|A,ICE63|A,ICE70|A,ICE71|A,ICE72|A,ICE73|A,ICE75|A…
AT1G11770	3976467-3976529	3976528	G	SPLICE_SITE_SNP	Fei-0|A
AT1G11800	3986855-3986920	3986895	C	SNP_EI	ICE153|T
AT1G11850	3999360-3999535	3999365	T	SPLICE_SIGNAL_SNP	Agu-1|C,Fei-0|C,ICE102|C,ICE104|C,ICE107|C,ICE112|C,ICE119|C,ICE150|C,ICE152|C,ICE153|C,ICE169|C,ICE173|C,ICE181|C,ICE1|C,ICE216|C,ICE21|C,ICE226|C,ICE228|C,ICE29|C,ICE36|C,ICE49|C,ICE50|C,ICE61|C,ICE75|C,ICE79|C,ICE91|C,ICE92|C,ICE97|C,ICE98|C,Leo-1|C,Nemrut-1|C,Pra-6|C,Qui-0|C,Rue3-1-31|C,Star-8|C,TueSB30-3|C,TueV13|C,TueWa1-2|C,Vie-0|C
AT1G11850	3999360-3999535	3999368	C	SPLICE_SIGNAL_SNP	ICE153|T,ICE181|T,ICE1|T,ICE29|T,ICE61|T,ICE75|T,ICE92|T,ICE97|T,ICE98|T,Star-8|T,TueV13|T,TueWa1-2|T
AT1G11850	3999360-3999535	3999370	G	SPLICE_SIGNAL_SNP	Cdm-0|A,ICE106|A,ICE120|A,Istisu-1|A,Lerik1-3|A,Mer-6|A,Vash-1|A,Xan-1|A
AT1G11850	3999360-3999535	3999376	A	SNP_EI	Agu-1|G,Fei-0|G,ICE102|G,ICE104|G,ICE107|G,ICE112|G,ICE119|G,ICE150|G,ICE152|G,ICE169|G,ICE173|G,ICE216|G,ICE21|G,ICE226|G,ICE228|G,ICE36|G,ICE49|G,ICE50|G,ICE79|G,ICE91|G,Leo-1|G,Nemrut-1|G,Pra-6|G,Qui-0|G,Rue3-1-31|G,TueSB30-3|G,Vie-0|G
AT1G11850	3999360-3999535	3999381	T	BP_SNP	Agu-1|C,Fei-0|C,ICE102|C,ICE104|C,ICE107|C,ICE112|C,ICE119|C,ICE150|C,ICE152|C,ICE169|C,ICE173|C,ICE216|C,ICE21|C,ICE226|C,ICE228|C,ICE36|C,ICE49|C,ICE50|C,ICE79|C,ICE91|C,Leo-1|C,Nemrut-1|C,Pra-6|C,Qui-0|C,Rue3-1-31|C,TueSB30-3|C,Vie-0|C
AT1G11850	3999360-3999535	3999412	T	SNP_EI	Tuescha9|C
AT1G11850	3999360-3999535	3999446	G	SNP_EI	Agu-1|A,Fei-0|A,ICE102|A,ICE104|A,ICE107|A,ICE112|A,ICE119|A,ICE150|A,ICE152|A,ICE169|A,ICE173|A,ICE216|A,ICE21|A,ICE226|A,ICE228|A,ICE36|A,ICE49|A,ICE50|A,ICE79|A,ICE91|A,Leo-1|A,Nemrut-1|A,Pra-6|A,Qui-0|A,Rue3-1-31|A,TueSB30-3|A,Vie-0|A
AT1G11850	3999360-3999535	3999485	C	SNP_EI	Agu-1|T,Fei-0|T,ICE102|T,ICE104|T,ICE107|T,ICE112|T,ICE119|T,ICE150|T,ICE152|T,ICE169|T,ICE173|T,ICE216|T,ICE21|T,ICE226|T,ICE228|T,ICE36|T,ICE49|T,ICE50|T,ICE79|T,ICE91|T,Leo-1|T,Nemrut-1|T,Pra-6|T,Qui-0|T,Rue3-1-31|T,TueSB30-3|T,Vie-0|T
AT1G11850	3999360-3999535	3999488	A	SNP_EI	Agu-1|C,Fei-0|C,ICE102|C,ICE104|C,ICE107|C,ICE112|C,ICE119|C,ICE150|C,ICE152|C,ICE169|C,ICE173|C,ICE216|C,ICE21|C,ICE226|C,ICE228|C,ICE36|C,ICE49|C,ICE50|C,ICE79|C,ICE91|C,Leo-1|C,Nemrut-1|C,Qui-0|C,Rue3-1-31|C,TueSB30-3|C,Vie-0|C
AT1G11850	3999360-3999535	3999527	G	SPLICE_SIGNAL_SNP	Agu-1|C,Fei-0|C,ICE102|C,ICE104|C,ICE107|C,ICE112|C,ICE119|C,ICE150|C,ICE152|C,ICE169|C,ICE173|C,ICE216|C,ICE21|C,ICE226|C,ICE228|C,ICE36|C,ICE49|C,ICE50|C,ICE79|C,ICE91|C,Leo-1|C,Nemrut-1|C,Pra-6|C,Qui-0|C,Rue3-1-31|C,TueSB30-3|C,Vie-0|C
AT1G11860	4002080-4002213	4002127	G	SNP_EI	Bak-2|T
AT1G11890	4011511-4011645	4011568	C	SNP_EI	ICE107|T,Nemrut-1|T
AT1G12220	4145703-4145875	4145730	C	SNP_EI	Qui-0|T
AT1G12220	4145703-4145875	4145778	G	SNP_EI	Fei-0|A,ICE102|A,ICE106|A,TueV13|A,TueWa1-2|A
AT1G12220	4145703-4145875	4145842	G	SNP_EI	Lerik1-3|T
AT1G12220	4145703-4145875	4145886	T	SNP_EI	Leo-1|C
AT1G12260	4163369-4163529	4163380	G	SNP_EI	Xan-1|C
AT1G12260	4163369-4163529	4163381	C	SNP_EI	Xan-1|A
AT1G12260	4163369-4163529	4163544	G	SNP_EI	Ler-1|C
AT1G12580	4284400-4284493	4284409	T	SPLICE_SIGNAL_SNP	ICE120|C
AT1G12780	4356821-4356910	4356851	T	SNP_EI	ICE169|A,ICE173|A
AT1G12780	4356821-4356910	4356888	T	SNP_EI	Bak-7|C,Ey15-2|C,ICE107|C,ICE163|C,ICE169|C,ICE173|C,ICE181|C,ICE1|C,ICE212|C,ICE213|C,ICE226|C,ICE228|C,ICE29|C,ICE36|C,ICE63|C,ICE7|C,Istisu-1|C,Nemrut-1|C,Vash-1|C,Xan-1|C
AT1G12780	4356821-4356910	4356900	C	SPLICE_SIGNAL_SNP	Del-10|T,ICE104|T
AT1G12780	4356821-4356910	4356911	T	SPLICE_SIGNAL_SNP	Bak-7|C,Ey15-2|C,ICE163|C,ICE169|C,ICE173|C,ICE181|C,ICE1|C,ICE212|C,ICE213|C,ICE226|C,ICE228|C,ICE29|C,ICE36|C,ICE63|C,ICE7|C,Nemrut-1|C
AT1G13090	4462267-4462520	4462253	G	SNP_EI	Bak-7|A,Ey15-2|A,HKT2.4|A,ICE107|A,ICE112|A,ICE119|A,ICE127|A,ICE130|A,ICE134|A,ICE138|A,ICE150|A,ICE152|A,ICE153|A,ICE212|A,ICE213|A,ICE216|A,ICE21|A,ICE36|A,ICE60|A,ICE61|A,ICE70|A,ICE71|A,ICE72|A,ICE73|A,ICE75|A,Kastel-1|A,Koch-1|A,Nemrut-1|A,Rue3-1-31|A,Sha|A,Yeg-1|A
AT1G13090	4462267-4462520	4462254	C	SNP_EI	Bak-2|T,ICE102|T,ICE29|T,ICE63|T,ICE7|T,Istisu-1|T,Lag2.2|T,Xan-1|T
AT1G13090	4462267-4462520	4462270	A	BP_SNP	Bak-2|C,ICE102|C,ICE29|C,ICE63|C,ICE7|C,Istisu-1|C,Lag2.2|C,Xan-1|C
AT1G13090	4462267-4462520	4462274	C	SPLICE_SIGNAL_SNP	Bak-2|T,Cdm-0|T,Dog-4|T,ICE102|T,ICE104|T,ICE1|T,ICE29|T,ICE63|T,ICE7|T,ICE92|T,ICE93|T,Istisu-1|T,Lag2.2|T,Mer-6|T,Vash-1|T,Xan-1|T
AT1G13090	4462267-4462520	4462287	A	SNP_EI	Ey15-2|G,ICE127|G,ICE130|G,ICE134|G,ICE138|G,ICE150|G,ICE152|G,ICE153|G,ICE21|G,ICE60|G,ICE61|G,ICE70|G,ICE71|G,ICE72|G,ICE75|G,Koch-1|G,Sha|G,Yeg-1|G
AT1G13090	4462267-4462520	4462362	A	SNP_EI	Cdm-0|G,Dog-4|G,ICE104|G,ICE111|G,ICE120|G,ICE1|G,ICE33|G,ICE92|G,ICE93|G,Mer-6|G,Vash-1|G
AT1G13090	4462267-4462520	4462367	A	SNP_EI	Bak-2|C,ICE102|C,ICE29|C,ICE63|C,ICE7|C,Istisu-1|C,Lag2.2|C,Xan-1|C
AT1G13090	4462267-4462520	4462403	A	SNP_EI	Del-10|C
AT1G13090	4462267-4462520	4462446	G	SNP_EI	Bak-2|A,ICE102|A,ICE29|A,ICE63|A,ICE7|A,Istisu-1|A,Lag2.2|A,Xan-1|A
AT1G13090	4462267-4462520	4462506	G	SNP_EI	ICE169|A,ICE173|A
AT1G13630	4670616-4670820	4670610	T	SNP_EI	WalhaesB4|A
AT1G13630	4670616-4670820	4670637	T	SNP_EI	ICE163|A,ICE169|A,ICE173|A,ICE181|A,ICE212|A,ICE213|A,ICE226|A,ICE228|A,ICE79|A
AT1G13630	4670616-4670820	4670647	C	SNP_EI	Lerik1-3|G
AT1G13630	4670616-4670820	4670660	T	SNP_EI	Fei-0|G,HKT2.4|G,ICE119|G,Nie1-2|G,Rue3-1-31|G,TueSB30-3|G,Tuescha9|G,WalhaesB4|G
AT1G13630	4670616-4670820	4670742	C	SNP_EI	Ey15-2|G
AT1G14170	4845150-4845226	4845209	C	SNP_EI	Don-0|G,Lerik1-3|G,Ped-0|G,Qui-0|G,Vie-0|G
AT1G14230	4863121-4863190	4863112	T	SNP_EI	Don-0|C,ICE97|C
AT1G14230	4863121-4863190	4863116	T	SNP_EI	Don-0|A,ICE97|A
AT1G14230	4863121-4863190	4863122	G	SPLICE_SITE_SNP	Qui-0|T
AT1G14230	4863121-4863190	4863125	T	SPLICE_SIGNAL_SNP	Don-0|C,ICE97|C
AT1G14230	4863121-4863190	4863129	C	SPLICE_SIGNAL_SNP	Don-0|T,ICE97|T
AT1G14230	4863121-4863190	4863131	T	SPLICE_SIGNAL_SNP	Ped-0|C
AT1G14230	4863121-4863190	4863139	A	SNP_EI	ICE49|G,ICE50|G
AT1G14230	4863121-4863190	4863164	C	SNP_EI	Don-0|T,ICE97|T
AT1G14230	4863121-4863190	4863182	A	SPLICE_SIGNAL_SNP	Don-0|T,ICE97|T
AT1G14230	4863121-4863190	4863191	C	SPLICE_SIGNAL_SNP	Fei-0|T
AT1G14230	4863121-4863190	4863198	C	SNP_EI	Don-0|A,ICE97|A
AT1G14560	4981841-4981931	4981842	G	BP_SNP	ICE107|A,ICE92|A
AT1G14560	4981841-4981931	4981875	A	SNP_EI	Kastel-1|T,Nemrut-1|T
AT1G14640	5024040-5024109	5024025	C	SNP_EI	ICE21|T
AT1G14640	5024040-5024109	5024034	G	SNP_EI	Xan-1|T
AT1G14640	5024040-5024109	5024035	C	SNP_EI	ICE107|T,ICE111|A,ICE33|T,ICE63|T,ICE92|T,Istisu-1|T,Lerik1-3|T,Star-8|T,TueSB30-3|T,TueV13|T,Xan-1|T
AT1G14640	5024040-5024109	5024037	C	SNP_EI	Don-0|G,Ped-0|G
AT1G14640	5024040-5024109	5024043	A	SPLICE_SIGNAL_SNP	Qui-0|G
AT1G14640	5024040-5024109	5024056	A	SNP_EI	ICE33|G
AT1G14640	5024040-5024109	5024069	C	SNP_EI	Qui-0|T
AT1G14640	5024040-5024109	5024091	G	SNP_EI	ICE104|T
AT1G14640	5024040-5024109	5024093	A	SNP_EI	Qui-0|G
AT1G14640	5024040-5024109	5024110	C	SPLICE_SIGNAL_SNP	Nemrut-1|G
AT1G14640	5024040-5024109	5024117	T	SNP_EI	Qui-0|C
AT1G14650	5028190-5029075	5028209	A	SNP_EI	ICE216|T
AT1G14650	5028190-5029075	5028415	C	SNP_EI	Qui-0|T
AT1G14650	5028190-5029075	5028427	C	SNP_EI	Qui-0|T
AT1G14650	5028190-5029075	5028436	C	SNP_EI	Qui-0|T
AT1G14650	5028190-5029075	5028439	T	SNP_EI	Qui-0|G
AT1G14650	5028190-5029075	5028456	G	SNP_EI	Don-0|T,Ped-0|T
AT1G14650	5028190-5029075	5028477	C	SNP_EI	Qui-0|T
AT1G14650	5028190-5029075	5028487	T	SNP_EI	Qui-0|A
AT1G14650	5028190-5029075	5028513	C	SNP_EI	ICE7|G
AT1G14650	5028190-5029075	5028532	T	SNP_EI	Qui-0|A
AT1G14650	5028190-5029075	5028539	A	SNP_EI	Qui-0|G
AT1G14650	5028190-5029075	5028577	T	SNP_EI	Qui-0|G
AT1G14650	5028190-5029075	5028616	T	SNP_EI	Qui-0|A
AT1G14650	5028190-5029075	5028637	G	SNP_EI	Qui-0|T
AT1G14650	5028190-5029075	5028640	T	SNP_EI	Qui-0|C
AT1G14650	5028190-5029075	5028643	A	SNP_EI	Qui-0|G
AT1G14650	5028190-5029075	5028682	A	SNP_EI	Qui-0|T
AT1G14650	5028190-5029075	5028701	C	SNP_EI	Qui-0|T
AT1G14650	5028190-5029075	5028705	C	SNP_EI	Dog-4|T,ICE127|T,ICE134|T
AT1G14650	5028190-5029075	5028724	G	SNP_EI	ICE7|A
AT1G14650	5028190-5029075	5028775	T	SNP_EI	ICE97|G,ICE98|G
AT1G14650	5028190-5029075	5028790	G	SNP_EI	ICE71|C,ICE72|C
AT1G14650	5028190-5029075	5028798	C	SNP_EI	Pra-6|T
AT1G14650	5028190-5029075	5028805	G	SNP_EI	Qui-0|C
AT1G14650	5028190-5029075	5028811	A	SNP_EI	Qui-0|T
AT1G14650	5028190-5029075	5028828	A	SNP_EI	Cdm-0|G,ICE104|G,ICE120|G,ICE29|G,ICE91|G,ICE93|G,Mer-6|G
AT1G14650	5028190-5029075	5028855	C	SNP_EI	ICE49|T,ICE50|T
AT1G14650	5028190-5029075	5028886	T	SNP_EI	ICE130|C,ICE138|C,ICE70|C,ICE71|C,ICE72|C,ICE73|C
AT1G14650	5028190-5029075	5028889	G	SNP_EI	Qui-0|A
AT1G14650	5028190-5029075	5028895	T	SNP_EI	Bak-2|G,Bak-7|G
AT1G14650	5028190-5029075	5028955	T	SNP_EI	Qui-0|A
AT1G14650	5028190-5029075	5029009	G	SNP_EI	Pra-6|A
AT1G14650	5028190-5029075	5029033	T	SNP_EI	ICE111|C,Lag2.2|C
AT1G14900	5138739-5138953	5138757	G	SNP_EI	ICE79|C
AT1G14900	5138739-5138953	5138812	C	SNP_EI	Tuescha9|T
AT1G14900	5138739-5138953	5138825	G	SNP_EI	Bak-2|C,ICE60|A
AT1G14900	5138739-5138953	5138828	A	SNP_EI	Bak-2|G,Bak-7|G,Don-0|G,Ey15-2|G,ICE111|G,ICE163|G,ICE169|G,ICE173|G,ICE181|G,ICE212|G,ICE213|G,ICE216|G,ICE226|G,ICE228|G,ICE79|G,ICE7|G,ICE97|G,ICE98|G,Istisu-1|G,Kastel-1|G,Lag2.2|G,Lerik1-3|G,Nie1-2|G,Tuescha9|G,TueV13|G,Xan-1|G
AT1G14900	5138739-5138953	5138829	T	SNP_EI	Bak-2|C
AT1G14900	5138739-5138953	5138841	G	SNP_EI	Bak-2|T,Bak-7|T,Don-0|T,Ey15-2|T,ICE111|T,ICE163|T,ICE169|T,ICE173|T,ICE181|T,ICE212|T,ICE213|T,ICE216|T,ICE226|T,ICE228|T,ICE79|T,ICE7|T,ICE97|T,ICE98|T,Istisu-1|T,Kastel-1|T,Lag2.2|T,Lerik1-3|T,Nie1-2|T,Tuescha9|T,TueV13|T,Xan-1|T
AT1G14900	5138739-5138953	5138845	A	SNP_EI	Bak-2|C,ICE111|C,Istisu-1|C,Lag2.2|C
AT1G14900	5138739-5138953	5138847	G	SNP_EI	ICE104|A
AT1G14900	5138739-5138953	5138878	G	SNP_EI	Bak-2|A,Bak-7|A,Don-0|A,Ey15-2|A,ICE111|A,ICE163|A,ICE169|A,ICE173|A,ICE181|A,ICE212|A,ICE213|A,ICE216|A,ICE226|A,ICE228|A,ICE79|A,ICE7|A,ICE97|A,ICE98|A,Istisu-1|A,Kastel-1|A,Lag2.2|A,Lerik1-3|A,Nie1-2|A,Tuescha9|A,TueV13|A,Xan-1|A
AT1G14900	5138739-5138953	5138908	G	SNP_EI	ICE163|A,ICE169|A,ICE173|A,ICE212|A,ICE213|A,ICE226|A,ICE228|A,ICE79|A
AT1G14900	5138739-5138953	5138915	G	SNP_EI	ICE63|A
AT1G14900	5138739-5138953	5138951	G	BP_SNP	Bak-2|A
AT1G14900	5138739-5138953	5138959	C	SNP_EI	Bak-2|T
AT1G14900	5138739-5138953	5138968	C	SNP_EI	Bak-2|A
AT1G15060	5185886-5186124	5185931	A	SNP_EI	Don-0|G,ICE163|G,ICE226|G,ICE228|G,ICE79|G
AT1G15060	5185886-5186124	5185933	A	SNP_EI	Don-0|T,ICE163|T,ICE226|T,ICE228|T,ICE79|T
AT1G15060	5185886-5186124	5186075	C	SNP_EI	Dog-4|T,ICE150|T,ICE152|T,ICE153|T,ICE75|T
AT1G15060	5185886-5186124	5186086	A	SNP_EI	Don-0|T,ICE163|T,ICE226|T,ICE228|T,ICE79|T
AT1G15060	5185886-5186124	5186094	T	SNP_EI	ICE169|C,ICE173|C,ICE212|C,ICE213|C,ICE36|C,ICE50|C
AT1G15060	5185886-5186124	5186128	A	SNP_EI	ICE127|T,ICE134|T,ICE71|T,ICE72|T
AT1G15080	5188138-5188266	5188138	G	BP_SNP	ICE36|A
AT1G15080	5188138-5188266	5188170	A	SNP_EI	Ler-1|T
AT1G15080	5188138-5188266	5188175	A	SNP_EI	Bak-2|T,Del-10|T,Don-0|T,Fei-0|T,ICE119|T,ICE127|T,ICE130|T,ICE134|T,ICE138|T,ICE163|T,ICE181|T,ICE21|T,ICE226|T,ICE228|T,ICE33|T,ICE49|T,ICE60|T,ICE61|T,ICE63|T,ICE70|T,ICE71|T,ICE72|T,ICE73|T,ICE79|T,ICE91|T,Istisu-1|T,Kastel-1|T,Lag2.2|T,Leo-1|T,Nemrut-1|T,Ped-0|T,Tuescha9|T,Vash-1|T,Ler-0|T
AT1G15080	5188138-5188266	5188221	T	SNP_EI	Ler-1|G
AT1G15080	5188138-5188266	5188226	T	SNP_EI	Bak-2|G,Del-10|G,Don-0|G,Fei-0|G,ICE119|G,ICE127|G,ICE130|G,ICE134|G,ICE138|G,ICE163|G,ICE181|G,ICE21|G,ICE226|G,ICE228|G,ICE33|G,ICE49|G,ICE60|G,ICE61|G,ICE63|G,ICE70|G,ICE71|G,ICE72|G,ICE73|G,ICE79|G,ICE91|G,Istisu-1|G,Kastel-1|G,Lag2.2|G,Leo-1|G,Nemrut-1|G,Ped-0|G,Tuescha9|G,Vash-1|G,Ler-0|G
AT1G15080	5188138-5188266	5188260	G	SPLICE_SIGNAL_SNP	Ler-1|A
AT1G15080	5188138-5188266	5188265	G	SPLICE_SITE_SNP	Bak-2|A,Del-10|A,Don-0|A,Fei-0|A,ICE119|A,ICE127|A,ICE130|A,ICE134|A,ICE138|A,ICE163|A,ICE181|A,ICE21|A,ICE226|A,ICE228|A,ICE33|A,ICE49|A,ICE60|A,ICE61|A,ICE63|A,ICE70|A,ICE71|A,ICE72|A,ICE73|A,ICE79|A,ICE91|A,Istisu-1|A,Kastel-1|A,Lag2.2|A,Leo-1|A,Nemrut-1|A,Ped-0|A,Tuescha9|A,Vash-1|A,Ler-0|A
AT1G15290	5258137-5258208	5258149	A	BP_SNP	ICE212|C,ICE213|C
AT1G15290	5258137-5258208	5258166	A	SNP_EI	Bak-7|G
AT1G15440	5308843-5309148	5309105	T	SNP_EI	Ler-1|C
AT1G15440	5308843-5309148	5309110	T	SNP_EI	Agu-1|C,Bak-2|C,Bak-7|C,Del-10|C,Dog-4|C,Don-0|C,Fei-0|C,ICE102|C,ICE106|C,ICE107|C,ICE111|C,ICE127|C,ICE130|C,ICE134|C,ICE138|C,ICE150|C,ICE152|C,ICE153|C,ICE163|C,ICE169|C,ICE173|C,ICE1|C,ICE212|C,ICE213|C,ICE21|C,ICE226|C,ICE228|C,ICE29|C,ICE33|C,ICE36|C,ICE49|C,ICE50|C,ICE60|C,ICE61|C,ICE63|C,ICE70|C,ICE71|C,ICE72|C,ICE73|C,ICE75|C,ICE79|C,ICE91|C,ICE92|C,ICE93|C,ICE97|C,ICE98|C,Istisu-1|C,Ka…
AT1G15510	5329660-5331576	5329668	G	SPLICE_SIGNAL_SNP	Istisu-1|T,Xan-1|T
AT1G15510	5329660-5331576	5329707	C	SNP_EI	ICE169|T,ICE173|T,ICE79|T
AT1G15510	5329660-5331576	5329716	G	SNP_EI	ICE212|T,ICE213|T,ICE50|T
AT1G15510	5329660-5331576	5329731	A	SNP_EI	ICE212|T,ICE213|T,ICE50|T
AT1G15510	5329660-5331576	5329744	C	SNP_EI	ICE212|T,ICE213|T,ICE50|T
AT1G15510	5329660-5331576	5329757	A	SNP_EI	ICE212|G,ICE213|G,ICE50|G
AT1G15510	5329660-5331576	5329776	G	SNP_EI	ICE212|C,ICE213|C,ICE50|C
AT1G15510	5329660-5331576	5329785	C	SNP_EI	ICE97|T,ICE98|T,Star-8|T
AT1G15510	5329660-5331576	5329812	T	SNP_EI	ICE212|A,ICE213|A,ICE50|A
AT1G15510	5329660-5331576	5329902	A	SNP_EI	ICE212|G,ICE213|G,ICE50|G
AT1G15510	5329660-5331576	5329920	A	SNP_EI	ICE212|G,ICE213|G,ICE50|G
AT1G15510	5329660-5331576	5329926	T	SNP_EI	ICE212|C,ICE213|C,ICE50|C
AT1G15510	5329660-5331576	5329957	G	SNP_EI	ICE212|A,ICE213|A,ICE50|A
AT1G15510	5329660-5331576	5329965	C	SNP_EI	Qui-0|T
AT1G15510	5329660-5331576	5330013	T	SNP_EI	ICE212|A,ICE213|A,ICE50|A
AT1G15510	5329660-5331576	5330047	A	SNP_EI	Lerik1-3|G
AT1G15510	5329660-5331576	5330073	G	SNP_EI	ICE212|T,ICE213|T,ICE50|T
AT1G15510	5329660-5331576	5330095	G	SNP_EI	ICE212|T,ICE213|T,ICE50|T
AT1G15510	5329660-5331576	5330130	G	SNP_EI	ICE1|A
AT1G15510	5329660-5331576	5330136	C	SNP_EI	ICE212|T,ICE213|T,ICE50|T
AT1G15510	5329660-5331576	5330187	G	SNP_EI	Lag2.2|C,Leo-1|C,Vash-1|C
AT1G15510	5329660-5331576	5330232	A	SNP_EI	ICE212|G,ICE213|G,ICE50|G
AT1G15510	5329660-5331576	5330250	T	SNP_EI	ICE212|G,ICE213|G,ICE50|G
AT1G15510	5329660-5331576	5330344	G	SNP_EI	Istisu-1|A,Xan-1|A
AT1G15510	5329660-5331576	5330353	G	SNP_EI	ICE212|A,ICE213|A,ICE50|A
AT1G15510	5329660-5331576	5330358	T	SNP_EI	ICE212|A,ICE213|A,ICE50|A
AT1G15510	5329660-5331576	5330362	G	SNP_EI	ICE21|C
AT1G15510	5329660-5331576	5330363	T	SNP_EI	ICE212|C,ICE213|C,ICE50|C
AT1G15510	5329660-5331576	5330398	A	SNP_EI	ICE212|G,ICE213|G,ICE50|G
AT1G15510	5329660-5331576	5330415	C	SNP_EI	ICE212|T,ICE213|T,ICE50|T
AT1G15510	5329660-5331576	5330460	T	SNP_EI	ICE212|C,ICE213|C,ICE50|C
AT1G15510	5329660-5331576	5330472	T	SNP_EI	ICE212|C,ICE213|C,ICE50|C
AT1G15510	5329660-5331576	5330484	C	SNP_EI	ICE212|T,ICE213|T,ICE50|T
AT1G15510	5329660-5331576	5330490	C	SNP_EI	ICE212|A,ICE213|A,ICE50|A
AT1G15510	5329660-5331576	5330559	C	SNP_EI	ICE212|A,ICE213|A,ICE50|A
AT1G15510	5329660-5331576	5330569	C	SNP_EI	ICE212|T,ICE213|T,ICE50|T
AT1G15510	5329660-5331576	5330610	C	SNP_EI	ICE212|T,ICE213|T,ICE50|T
AT1G15510	5329660-5331576	5330625	A	SNP_EI	ICE212|T,ICE213|T,ICE50|T
AT1G15510	5329660-5331576	5330652	G	SNP_EI	ICE106|A,ICE107|A,ICE92|A,ICE93|A,ICE97|A,ICE98|A,Star-8|A,TueWa1-2|A
AT1G15510	5329660-5331576	5330661	G	SNP_EI	ICE212|A,ICE213|A,ICE50|A
AT1G15510	5329660-5331576	5330679	T	SNP_EI	ICE212|C,ICE213|C,ICE50|C
AT1G15510	5329660-5331576	5330690	C	SNP_EI	Bak-7|T,ICE29|T,Nemrut-1|T
AT1G15510	5329660-5331576	5330699	G	SNP_EI	ICE212|T,ICE213|T,ICE50|T
AT1G15510	5329660-5331576	5330724	A	SNP_EI	ICE63|T
AT1G15510	5329660-5331576	5330728	T	SNP_EI	ICE212|C,ICE213|C,ICE50|C
AT1G15510	5329660-5331576	5330762	C	SNP_EI	ICE212|T,ICE213|T,ICE50|T
AT1G15510	5329660-5331576	5330771	G	SNP_EI	ICE212|A,ICE213|A,ICE50|A
AT1G15510	5329660-5331576	5330800	A	SNP_EI	ICE212|T,ICE213|T,ICE50|T
AT1G15510	5329660-5331576	5330849	C	SNP_EI	ICE212|T,ICE213|T,ICE50|T,Ped-0|T
AT1G15510	5329660-5331576	5330856	G	SNP_EI	ICE212|A,ICE213|A
AT1G15510	5329660-5331576	5330859	A	SNP_EI	Ped-0|G
AT1G15510	5329660-5331576	5330875	A	SNP_EI	ICE130|C
AT1G15510	5329660-5331576	5330885	C	SNP_EI	ICE212|G,ICE213|G,ICE50|G
AT1G15510	5329660-5331576	5330988	T	SNP_EI	ICE212|A,ICE213|A,ICE50|A
AT1G15510	5329660-5331576	5331003	A	SNP_EI	ICE212|G,ICE213|G,ICE50|G
AT1G15510	5329660-5331576	5331108	C	SNP_EI	ICE212|T,ICE213|T,ICE50|T
AT1G15510	5329660-5331576	5331150	A	SNP_EI	ICE212|C,ICE213|C,ICE50|C
AT1G15510	5329660-5331576	5331162	T	SNP_EI	ICE169|G,ICE173|G,ICE79|G
AT1G15510	5329660-5331576	5331280	A	SNP_EI	ICE212|G,ICE213|G,ICE50|G
AT1G15510	5329660-5331576	5331396	C	SNP_EI	Dog-4|A,ICE150|A,ICE152|A,ICE153|A,Sha|A
AT1G15510	5329660-5331576	5331433	G	SNP_EI	ICE212|A,ICE213|A,ICE50|A
AT1G15510	5329660-5331576	5331444	T	SNP_EI	Ler-1|G
AT1G15510	5329660-5331576	5331449	T	SNP_EI	Agu-1|G,Bak-2|G,Bak-7|G,Del-10|G,Dog-4|G,Don-0|G,Fei-0|G,ICE102|G,ICE111|G,ICE119|G,ICE127|G,ICE130|G,ICE134|G,ICE138|G,ICE150|G,ICE152|G,ICE153|G,ICE163|G,ICE169|G,ICE173|G,ICE181|G,ICE1|G,ICE212|G,ICE213|G,ICE21|G,ICE226|G,ICE228|G,ICE29|G,ICE36|G,ICE49|G,ICE50|G,ICE60|G,ICE61|G,ICE63|G,ICE70|G,ICE71|G,ICE72|G,ICE73|G,ICE75|G,ICE79|G,ICE91|G,Kastel-1|G,Koch-1|G,Lag2.2|G,Leo-1|G,Lerik1-3|G,Nemru…
AT1G15510	5329660-5331576	5331485	G	SNP_EI	Ler-1|T
AT1G15510	5329660-5331576	5331490	G	SNP_EI	Del-10|T,ICE102|T,ICE181|T,ICE21|T,ICE36|T,Ler-0|T
AT1G15510	5329660-5331576	5331526	A	SNP_EI	ICE163|G,ICE226|G,ICE228|G
AT1G16110	5519730-5519849	5519721	T	SNP_EI	ICE49|C,ICE50|C
AT1G16110	5519730-5519849	5519764	T	SNP_EI	Don-0|C,ICE163|C,ICE49|C,ICE50|C,ICE79|C,ICE93|C,Ped-0|C,Qui-0|C
AT1G16110	5519730-5519849	5519772	A	SNP_EI	Don-0|G
AT1G16110	5519730-5519849	5519780	T	SNP_EI	Ler-1|G
AT1G16110	5519730-5519849	5519786	T	SNP_EI	Agu-1|G,Bak-2|G,Bak-7|G,Cdm-0|G,Del-10|G,Dog-4|G,Don-0|G,Ey15-2|G,Fei-0|G,HKT2.4|G,ICE104|G,ICE107|G,ICE119|G,ICE127|G,ICE130|G,ICE134|G,ICE138|G,ICE150|G,ICE152|G,ICE153|G,ICE163|G,ICE169|G,ICE173|G,ICE181|G,ICE1|G,ICE212|G,ICE213|G,ICE216|G,ICE21|G,ICE226|G,ICE228|G,ICE29|G,ICE33|G,ICE36|G,ICE49|G,ICE50|G,ICE60|G,ICE61|G,ICE63|G,ICE70|G,ICE71|G,ICE72|G,ICE73|G,ICE75|G,ICE79|G,ICE7|G,ICE93|G,ICE…
AT1G16110	5519730-5519849	5519828	T	SNP_EI	ICE49|A,ICE50|A,Qui-0|A
AT1G16110	5520319-5520401	5520308	T	SNP_EI	Don-0|C
AT1G16110	5520319-5520401	5520312	C	SNP_EI	Dog-4|G,ICE169|G,ICE173|G,Lag2.2|G,Lerik1-3|G
AT1G16110	5520319-5520401	5520320	G	SPLICE_SITE_SNP	Don-0|A,ICE49|A,ICE50|A,ICE79|A,ICE93|A,Ped-0|A,Qui-0|A
AT1G16110	5520319-5520401	5520328	C	SPLICE_SIGNAL_SNP	Xan-1|T
AT1G16110	5520319-5520401	5520344	T	SNP_EI	Don-0|C,ICE49|C,ICE50|C,ICE79|C,ICE93|C,Ped-0|C,Qui-0|C
AT1G16110	5520319-5520401	5520350	G	SNP_EI	Ler-1|T
AT1G16110	5520319-5520401	5520356	G	SNP_EI	Ler-0|T
AT1G16110	5520319-5520401	5520364	T	SNP_EI	ICE150|A,ICE152|A,ICE153|A,ICE1|A,ICE60|A,ICE75|A
AT1G16110	5520319-5520401	5520370	G	SNP_EI	ICE49|A,ICE50|A,ICE79|A,ICE93|A,Ped-0|A,Qui-0|A
AT1G16110	5520319-5520401	5520374	A	SNP_EI	ICE49|G,ICE50|G,ICE79|G,ICE93|G,Ped-0|G,Qui-0|G
AT1G16110	5520319-5520401	5520404	C	SNP_EI	ICE49|T,ICE50|T,ICE79|T,ICE93|T
AT1G16370	5596839-5597591	5596824	A	SNP_EI	Agu-1|C,Bak-2|C,Bak-7|C,Cdm-0|C,Del-10|C,Dog-4|C,Ey15-2|C,HKT2.4|C,ICE104|C,ICE106|C,ICE107|C,ICE119|C,ICE120|C,ICE127|C,ICE130|C,ICE134|C,ICE138|C,ICE150|C,ICE152|C,ICE153|C,ICE163|C,ICE169|C,ICE173|C,ICE181|C,ICE1|C,ICE212|C,ICE213|C,ICE216|C,ICE21|C,ICE226|C,ICE228|C,ICE29|C,ICE33|C,ICE36|C,ICE49|C,ICE60|C,ICE61|C,ICE63|C,ICE70|C,ICE71|C,ICE72|C,ICE73|C,ICE75|C,ICE79|C,ICE7|C,ICE91|C,ICE92|C,I…
AT1G16370	5596839-5597591	5596829	T	SNP_EI	Ler-1|C
AT1G16370	5596839-5597591	5596835	T	SNP_EI	Agu-1|C,Bak-2|C,Bak-7|C,Cdm-0|C,Del-10|C,Dog-4|C,Ey15-2|C,HKT2.4|C,ICE102|C,ICE104|C,ICE106|C,ICE107|C,ICE111|C,ICE112|C,ICE119|C,ICE120|C,ICE127|C,ICE130|C,ICE134|C,ICE138|C,ICE150|C,ICE152|C,ICE153|C,ICE163|C,ICE169|C,ICE173|C,ICE181|C,ICE1|C,ICE212|C,ICE213|C,ICE216|C,ICE21|C,ICE226|C,ICE228|C,ICE29|C,ICE33|C,ICE36|C,ICE49|C,ICE60|C,ICE61|C,ICE63|C,ICE70|C,ICE71|C,ICE72|C,ICE73|C,ICE75|C,ICE79…
AT1G16370	5596839-5597591	5596902	T	SNP_EI	Ler-1|A
AT1G16370	5596839-5597591	5596908	T	SNP_EI	Agu-1|A,Bak-2|A,Bak-7|A,Cdm-0|A,Del-10|A,Dog-4|A,Ey15-2|A,HKT2.4|A,ICE104|A,ICE106|A,ICE107|A,ICE119|A,ICE120|A,ICE127|A,ICE130|A,ICE134|A,ICE138|A,ICE150|A,ICE152|A,ICE153|A,ICE163|A,ICE169|A,ICE173|A,ICE1|A,ICE212|A,ICE213|A,ICE216|A,ICE21|A,ICE226|A,ICE228|A,ICE29|A,ICE33|A,ICE36|A,ICE49|A,ICE60|A,ICE61|A,ICE63|A,ICE70|A,ICE71|A,ICE72|A,ICE73|A,ICE75|A,ICE79|A,ICE7|A,ICE91|A,ICE92|A,ICE93|A,Is…
AT1G16370	5596839-5597591	5596930	C	SNP_EI	Ped-0|T
AT1G16370	5596839-5597591	5596932	C	SNP_EI	Ler-1|T
AT1G16370	5596839-5597591	5596938	C	SNP_EI	Agu-1|T,Bak-2|T,Bak-7|T,Cdm-0|T,Del-10|T,Dog-4|T,Ey15-2|T,HKT2.4|T,ICE104|T,ICE106|T,ICE107|T,ICE119|T,ICE120|T,ICE127|T,ICE130|T,ICE134|T,ICE138|T,ICE150|T,ICE152|T,ICE153|T,ICE163|T,ICE169|T,ICE173|T,ICE181|T,ICE1|T,ICE212|T,ICE213|T,ICE216|T,ICE21|T,ICE226|T,ICE228|T,ICE29|T,ICE33|T,ICE36|T,ICE49|T,ICE60|T,ICE61|T,ICE63|T,ICE70|T,ICE71|T,ICE72|T,ICE73|T,ICE75|T,ICE79|T,ICE7|T,ICE91|T,ICE92|T,I…
AT1G16370	5596839-5597591	5596976	A	SNP_EI	ICE102|C,ICE111|C,ICE112|C,ICE97|C,ICE98|C,TueWa1-2|C
AT1G16370	5596839-5597591	5597010	T	SNP_EI	Agu-1|C,Bak-2|C,Bak-7|C,Del-10|C,Ey15-2|C,HKT2.4|C,ICE127|C,ICE130|C,ICE134|C,ICE138|C,ICE150|C,ICE152|C,ICE153|C,ICE163|C,ICE1|C,ICE216|C,ICE21|C,ICE226|C,ICE228|C,ICE36|C,ICE49|C,ICE60|C,ICE61|C,ICE63|C,ICE71|C,ICE72|C,ICE75|C,ICE79|C,ICE7|C,ICE93|C,Istisu-1|C,Kastel-1|C,Koch-1|C,Leo-1|C,Nemrut-1|C,Pra-6|C,Qui-0|C,Rue3-1-31|C,Sha|C,TueSB30-3|C,Vash-1|C,WalhaesB4|C,Xan-1|C,Yeg-1|C
AT1G16370	5596839-5597591	5597020	G	SNP_EI	ICE49|C
AT1G16370	5596839-5597591	5597022	C	SNP_EI	Agu-1|T,Bak-2|T,Bak-7|T,Del-10|T,Ey15-2|T,HKT2.4|T,ICE127|T,ICE130|T,ICE134|T,ICE138|T,ICE150|T,ICE152|T,ICE153|T,ICE163|T,ICE1|T,ICE216|T,ICE21|T,ICE226|T,ICE228|T,ICE36|T,ICE49|T,ICE60|T,ICE61|T,ICE63|T,ICE71|T,ICE72|T,ICE75|T,ICE79|T,ICE7|T,ICE93|T,Istisu-1|T,Kastel-1|T,Koch-1|T,Leo-1|T,Nemrut-1|T,Pra-6|T,Qui-0|T,Rue3-1-31|T,Sha|T,TueSB30-3|T,Vash-1|T,WalhaesB4|T,Xan-1|T,Yeg-1|T
AT1G16370	5596839-5597591	5597073	C	SNP_EI	Agu-1|T,Bak-2|T,Bak-7|T,Del-10|T,Ey15-2|T,HKT2.4|T,ICE119|T,ICE127|T,ICE130|T,ICE134|T,ICE138|T,ICE150|T,ICE152|T,ICE153|T,ICE163|T,ICE181|T,ICE1|T,ICE212|T,ICE213|T,ICE216|T,ICE21|T,ICE226|T,ICE228|T,ICE29|T,ICE36|T,ICE49|T,ICE60|T,ICE61|T,ICE63|T,ICE70|T,ICE71|T,ICE72|T,ICE73|T,ICE75|T,ICE79|T,ICE7|T,ICE92|T,ICE93|T,Istisu-1|T,Kastel-1|T,Koch-1|T,Lag2.2|T,Leo-1|T,Nemrut-1|T,Nie1-2|T,Pra-6|T,Qui…
AT1G16370	5596839-5597591	5597074	C	SNP_EI	Agu-1|A,Bak-2|A,Bak-7|A,Del-10|A,Ey15-2|A,HKT2.4|A,ICE119|A,ICE127|A,ICE130|A,ICE134|A,ICE138|A,ICE150|A,ICE152|A,ICE153|A,ICE163|A,ICE181|A,ICE1|A,ICE212|A,ICE213|A,ICE216|A,ICE21|A,ICE226|A,ICE228|A,ICE29|A,ICE36|A,ICE49|A,ICE60|A,ICE61|A,ICE63|A,ICE70|A,ICE71|A,ICE72|A,ICE73|A,ICE75|A,ICE79|A,ICE7|A,ICE92|A,ICE93|A,Istisu-1|A,Kastel-1|A,Koch-1|A,Lag2.2|A,Leo-1|A,Nemrut-1|A,Nie1-2|A,Pra-6|A,Qui…
AT1G16370	5596839-5597591	5597079	C	SNP_EI	Agu-1|T,Bak-2|T,Bak-7|T,Del-10|T,Ey15-2|T,HKT2.4|T,ICE127|T,ICE130|T,ICE134|T,ICE138|T,ICE150|T,ICE152|T,ICE153|T,ICE163|T,ICE1|T,ICE216|T,ICE21|T,ICE226|T,ICE228|T,ICE36|T,ICE49|T,ICE60|T,ICE61|T,ICE63|T,ICE71|T,ICE72|T,ICE75|T,ICE79|T,ICE7|T,ICE93|T,Istisu-1|T,Kastel-1|T,Koch-1|T,Leo-1|T,Nemrut-1|T,Pra-6|T,Qui-0|T,Rue3-1-31|T,Sha|T,TueSB30-3|T,Vash-1|T,WalhaesB4|T,Xan-1|T,Yeg-1|T
AT1G16370	5596839-5597591	5597141	G	SNP_EI	Ey15-2|C
AT1G16370	5596839-5597591	5597200	G	SNP_EI	Bak-2|C,Bak-7|C,ICE130|C,ICE138|C,ICE216|C,ICE226|C,ICE228|C,ICE93|C,Koch-1|C
AT1G16370	5596839-5597591	5597206	T	SNP_EI	Agu-1|C,Del-10|C,Ey15-2|C,HKT2.4|C,ICE127|C,ICE134|C,ICE150|C,ICE152|C,ICE153|C,ICE1|C,ICE21|C,ICE36|C,ICE49|C,ICE60|C,ICE61|C,ICE63|C,ICE71|C,ICE72|C,ICE75|C,ICE7|C,Kastel-1|C,Leo-1|C,Pra-6|C,Qui-0|C,Rue3-1-31|C,Sha|C,TueSB30-3|C,WalhaesB4|C,Xan-1|C,Yeg-1|C
AT1G16370	5596839-5597591	5597232	C	SNP_EI	Don-0|T,Fei-0|T,Tuescha9|T,TueV13|T
AT1G16370	5596839-5597591	5597256	T	SNP_EI	ICE92|C
AT1G16370	5596839-5597591	5597405	T	SNP_EI	Ped-0|C
AT1G16370	5596839-5597591	5597466	T	SNP_EI	Ler-1|G
AT1G16370	5596839-5597591	5597472	T	SNP_EI	Agu-1|G,Bak-2|G,Bak-7|G,Cdm-0|G,Del-10|G,Dog-4|G,Ey15-2|G,HKT2.4|G,ICE104|G,ICE106|G,ICE107|G,ICE119|G,ICE120|G,ICE127|G,ICE130|G,ICE134|G,ICE138|G,ICE150|G,ICE152|G,ICE153|G,ICE163|G,ICE169|G,ICE173|G,ICE181|G,ICE1|G,ICE212|G,ICE213|G,ICE216|G,ICE21|G,ICE226|G,ICE228|G,ICE29|G,ICE33|G,ICE36|G,ICE49|G,ICE60|G,ICE61|G,ICE63|G,ICE70|G,ICE71|G,ICE72|G,ICE73|G,ICE75|G,ICE79|G,ICE7|G,ICE91|G,ICE92|G,I…
AT1G16370	5596839-5597591	5597493	A	SNP_EI	ICE60|G
AT1G16370	5596839-5597591	5597496	A	SNP_EI	Ler-1|C
AT1G16370	5596839-5597591	5597498	T	SNP_EI	Ler-1|G
AT1G16370	5596839-5597591	5597502	A	SNP_EI	Agu-1|C,Bak-2|C,Bak-7|C,Cdm-0|C,Del-10|C,Dog-4|C,Ey15-2|C,HKT2.4|C,ICE104|C,ICE106|C,ICE107|C,ICE119|C,ICE120|C,ICE127|C,ICE130|C,ICE134|C,ICE138|C,ICE150|C,ICE152|C,ICE153|C,ICE163|C,ICE169|C,ICE173|C,ICE181|C,ICE1|C,ICE212|C,ICE213|C,ICE216|C,ICE21|C,ICE226|C,ICE228|C,ICE29|C,ICE33|C,ICE36|C,ICE49|C,ICE60|C,ICE61|C,ICE63|C,ICE70|C,ICE71|C,ICE72|C,ICE73|C,ICE75|C,ICE79|C,ICE7|C,ICE91|C,ICE92|C,I…
AT1G16370	5596839-5597591	5597504	T	SNP_EI	Agu-1|G,Bak-2|G,Bak-7|G,Cdm-0|G,Del-10|G,Dog-4|G,Ey15-2|G,HKT2.4|G,ICE104|G,ICE106|G,ICE107|G,ICE119|G,ICE120|G,ICE127|G,ICE130|G,ICE134|G,ICE138|G,ICE150|G,ICE152|G,ICE153|G,ICE163|G,ICE169|G,ICE173|G,ICE181|G,ICE1|G,ICE212|G,ICE213|G,ICE216|G,ICE21|G,ICE226|G,ICE228|G,ICE29|G,ICE33|G,ICE36|G,ICE49|G,ICE60|G,ICE61|G,ICE63|G,ICE70|G,ICE71|G,ICE72|G,ICE73|G,ICE75|G,ICE79|G,ICE7|G,ICE91|G,ICE92|G,I…
AT1G16370	5596839-5597591	5597515	T	SNP_EI	Cdm-0|C,ICE104|C,ICE120|C,Mer-6|C
AT1G16370	5596839-5597591	5597535	C	SNP_EI	Ler-1|T
AT1G16370	5596839-5597591	5597541	C	SNP_EI	Agu-1|T,Bak-2|T,Bak-7|T,Cdm-0|T,Del-10|T,Dog-4|T,Ey15-2|T,HKT2.4|T,ICE104|T,ICE106|T,ICE107|T,ICE119|T,ICE120|T,ICE127|T,ICE130|T,ICE134|T,ICE138|T,ICE150|T,ICE152|T,ICE153|T,ICE163|T,ICE169|T,ICE173|T,ICE181|T,ICE1|T,ICE212|T,ICE213|T,ICE216|T,ICE21|T,ICE226|T,ICE228|T,ICE29|T,ICE33|T,ICE36|T,ICE49|T,ICE60|T,ICE61|T,ICE63|T,ICE70|T,ICE71|T,ICE72|T,ICE73|T,ICE75|T,ICE79|T,ICE7|T,ICE91|T,ICE92|T,I…
AT1G16370	5596839-5597591	5597593	A	SPLICE_SIGNAL_SNP	ICE50|G
AT1G16370	5596839-5597591	5597599	A	SNP_EI	Ler-1|T
AT1G16370	5596839-5597591	5597605	A	SNP_EI	Agu-1|T,Bak-2|T,Bak-7|T,Cdm-0|T,Del-10|T,Dog-4|T,Ey15-2|T,HKT2.4|T,ICE104|T,ICE106|T,ICE107|T,ICE119|T,ICE120|T,ICE127|T,ICE130|T,ICE134|T,ICE138|T,ICE150|T,ICE152|T,ICE153|T,ICE163|T,ICE169|T,ICE173|T,ICE181|T,ICE1|T,ICE212|T,ICE213|T,ICE216|T,ICE21|T,ICE226|T,ICE228|T,ICE29|T,ICE33|T,ICE36|T,ICE49|T,ICE60|T,ICE61|T,ICE63|T,ICE70|T,ICE71|T,ICE72|T,ICE73|T,ICE75|T,ICE79|T,ICE7|T,ICE91|T,ICE92|T,I…
AT1G16390	5603929-5604063	5603936	T	SPLICE_SIGNAL_SNP	ICE150|C,ICE152|C,ICE153|C,ICE1|C,ICE60|C,ICE75|C,Yeg-1|C
AT1G16390	5603929-5604063	5603961	A	SNP_EI	Ped-0|T
AT1G16390	5603929-5604063	5603995	G	SNP_EI	ICE120|A
AT1G16390	5603929-5604063	5604004	G	SNP_EI	ICE169|T,ICE173|T,ICE33|T
AT1G16390	5603929-5604063	5604067	G	SNP_EI	ICE216|C
AT1G16540	5660557-5660645	5660565	T	SPLICE_SIGNAL_SNP	Agu-1|C,Fei-0|C,Pra-6|C,TueV13|C
AT1G16540	5660557-5660645	5660629	C	BP_SNP	Ler-1|G
AT1G16540	5660557-5660645	5660636	C	BP_SNP	Agu-1|G,Bak-2|G,Bak-7|G,Cdm-0|G,Del-10|G,Dog-4|G,Don-0|G,Ey15-2|G,Fei-0|G,HKT2.4|G,ICE102|G,ICE104|G,ICE106|G,ICE107|G,ICE111|G,ICE112|G,ICE119|G,ICE120|G,ICE127|G,ICE130|G,ICE134|G,ICE138|G,ICE150|G,ICE152|G,ICE153|G,ICE163|G,ICE169|G,ICE173|G,ICE181|G,ICE1|G,ICE212|G,ICE213|G,ICE216|G,ICE21|G,ICE226|G,ICE228|G,ICE29|G,ICE33|G,ICE36|G,ICE49|G,ICE50|G,ICE60|G,ICE61|G,ICE63|G,ICE70|G,ICE71|G,ICE72…
AT1G17050	5829374-5829452	5829359	C	SNP_EI	ICE49|T,ICE50|T
AT1G17050	5829374-5829452	5829386	C	SNP_EI	ICE49|G,ICE50|G,Pra-6|G
AT1G17050	5829374-5829452	5829390	G	SNP_EI	ICE49|C,ICE50|C,Pra-6|C
AT1G17050	5829374-5829452	5829395	C	SNP_EI	ICE49|A,ICE50|A,Pra-6|A
AT1G17050	5829374-5829452	5829435	G	SNP_EI	Istisu-1|C
AT1G17050	5829374-5829452	5829465	C	SNP_EI	Nie1-2|T
AT1G17230	5891513-5894131	5891504	T	SNP_EI	Bak-2|G,Bak-7|G,ICE71|G
AT1G17230	5891513-5894131	5891572	C	SNP_EI	Del-10|T,ICE36|T
AT1G17230	5891513-5894131	5891718	G	SNP_EI	ICE111|A
AT1G17230	5891513-5894131	5891804	C	SNP_EI	Pra-6|T
AT1G17230	5891513-5894131	5891808	C	SNP_EI	Ler-1|T
AT1G17230	5891513-5894131	5891815	C	SNP_EI	Ler-0|T
AT1G17230	5891513-5894131	5891852	G	SNP_EI	ICE72|A,ICE73|A
AT1G17230	5891513-5894131	5891866	A	SNP_EI	Bak-2|G,Bak-7|G,ICE71|G,Ped-0|G,WalhaesB4|G
AT1G17230	5891513-5894131	5891937	A	SNP_EI	ICE49|T,ICE50|T
AT1G17230	5891513-5894131	5891992	A	SNP_EI	ICE127|T,ICE134|T,ICE60|T
AT1G17230	5891513-5894131	5892010	C	SNP_EI	ICE106|A,ICE91|A
AT1G17230	5891513-5894131	5892260	A	SNP_EI	ICE49|G,ICE50|G
AT1G17230	5891513-5894131	5892276	G	SNP_EI	ICE33|A
AT1G17230	5891513-5894131	5892404	C	SNP_EI	Ped-0|T
AT1G17230	5891513-5894131	5892440	C	SNP_EI	ICE127|T,ICE134|T,ICE60|T,ICE79|T,ICE7|T,ICE92|T,Kastel-1|T
AT1G17230	5891513-5894131	5892568	A	SNP_EI	ICE127|C,ICE134|C,ICE60|C,ICE79|C,ICE7|C,ICE92|C,Kastel-1|C
AT1G17230	5891513-5894131	5892601	C	SNP_EI	ICE7|T,ICE92|T
AT1G17230	5891513-5894131	5892649	A	SNP_EI	ICE29|C
AT1G17230	5891513-5894131	5892790	T	SNP_EI	ICE7|A,ICE92|A
AT1G17230	5891513-5894131	5892843	A	SNP_EI	ICE111|C
AT1G17230	5891513-5894131	5892857	C	SNP_EI	Pra-6|A
AT1G17230	5891513-5894131	5892999	A	SNP_EI	Ped-0|C,Ler-1|G
AT1G17230	5891513-5894131	5893006	A	SNP_EI	Agu-1|G,Bak-2|G,Bak-7|G,Del-10|G,Don-0|G,Ey15-2|G,HKT2.4|G,ICE111|G,ICE127|G,ICE134|G,ICE216|G,ICE226|G,ICE228|G,ICE36|G,ICE49|G,ICE50|G,ICE60|G,ICE71|G,ICE72|G,ICE73|G,ICE79|G,ICE7|G,ICE92|G,ICE97|G,ICE98|G,Kastel-1|G,Lag2.2|G,Leo-1|G,Nie1-2|G,Ped-0|G,Pra-6|G,Tuescha9|G,Vash-1|G,Vie-0|G,WalhaesB4|G,Ler-0|G
AT1G17230	5891513-5894131	5893079	C	SNP_EI	ICE33|T
AT1G17230	5891513-5894131	5893080	A	SNP_EI	ICE33|T
AT1G17230	5891513-5894131	5893084	G	SNP_EI	ICE130|A,ICE138|A,ICE150|A,ICE152|A,ICE153|A,ICE1|A,ICE61|A,ICE70|A,ICE75|A,Koch-1|A,Sha|A,Yeg-1|A
AT1G17230	5891513-5894131	5893200	A	SNP_EI	ICE127|G,ICE134|G,ICE60|G,ICE79|G,ICE7|G,ICE92|G,Kastel-1|G
AT1G17230	5891513-5894131	5893257	G	SNP_EI	Sha|A
AT1G17230	5891513-5894131	5893366	T	SNP_EI	ICE169|A,ICE173|A,ICE21|A
AT1G17230	5891513-5894131	5893462	G	SNP_EI	Don-0|A
AT1G17230	5891513-5894131	5893503	G	SNP_EI	ICE138|C,ICE61|C
AT1G17230	5891513-5894131	5893506	A	SNP_EI	ICE138|T,ICE61|T
AT1G17230	5891513-5894131	5893570	G	SNP_EI	ICE127|A,ICE134|A,ICE60|A,ICE79|A,ICE7|A,ICE92|A,Kastel-1|A
AT1G17230	5891513-5894131	5893655	C	SNP_EI	ICE7|T,ICE92|T
AT1G17230	5891513-5894131	5893831	A	SNP_EI	ICE127|G,ICE134|G,ICE60|G,ICE79|G,ICE7|G,ICE92|G,Kastel-1|G
AT1G17230	5891513-5894131	5893838	G	SNP_EI	ICE134|A
AT1G17230	5891513-5894131	5893861	G	SNP_EI	Ped-0|A
AT1G17230	5891513-5894131	5894020	C	SNP_EI	Don-0|T
AT1G17230	5891513-5894131	5894051	T	SNP_EI	Agu-1|A,Leo-1|A,Nie1-2|A
AT1G17230	5891513-5894131	5894080	A	SNP_EI	ICE127|G,ICE134|G,ICE60|G,ICE79|G,ICE7|G,ICE92|G,Kastel-1|G
AT1G18550	6382660-6382722	6382669	C	SPLICE_SIGNAL_SNP	HKT2.4|T
AT1G18550	6382660-6382722	6382728	A	SNP_EI	ICE29|T
AT1G18670	6429941-6430024	6429994	T	SNP_EI	Yeg-1|G
AT1G18900	6530002-6531273	6529999	A	SNP_EI	Ler-1|T
AT1G18900	6530002-6531273	6530008	A	SPLICE_SIGNAL_SNP	Don-0|T,ICE106|T,ICE119|T,ICE127|T,ICE130|T,ICE134|T,ICE138|T,ICE150|T,ICE152|T,ICE153|T,ICE181|T,ICE1|T,ICE49|T,ICE50|T,ICE60|T,ICE61|T,ICE70|T,ICE71|T,ICE72|T,ICE75|T,ICE79|T,Koch-1|T,Qui-0|T,Sha|T,Ler-0|T
AT1G18900	6530002-6531273	6530011	A	SPLICE_SIGNAL_SNP	ICE106|T
AT1G18900	6530002-6531273	6530035	T	BP_SNP	Ler-1|G
AT1G18900	6530002-6531273	6530044	T	SNP_EI	Don-0|G,ICE106|A,ICE119|G,ICE127|G,ICE130|G,ICE134|G,ICE138|G,ICE150|G,ICE152|G,ICE153|G,ICE181|G,ICE1|G,ICE49|G,ICE50|G,ICE60|G,ICE61|G,ICE70|G,ICE71|G,ICE72|G,ICE75|G,ICE79|G,Koch-1|G,Qui-0|G,Sha|G,Ler-0|G
AT1G18900	6530002-6531273	6530061	T	SNP_EI	Ler-1|A
AT1G18900	6530002-6531273	6530070	T	SNP_EI	Don-0|A,ICE106|A,ICE119|A,ICE127|A,ICE130|A,ICE134|A,ICE138|A,ICE150|A,ICE152|A,ICE153|A,ICE181|A,ICE1|A,ICE49|A,ICE50|A,ICE60|A,ICE61|A,ICE70|A,ICE71|A,ICE72|A,ICE75|A,ICE79|A,Koch-1|A,Qui-0|A,Sha|A,Ler-0|A
AT1G18900	6530002-6531273	6530074	T	SNP_EI	Ler-1|A
AT1G18900	6530002-6531273	6530077	C	SNP_EI	Ler-1|T
AT1G18900	6530002-6531273	6530083	T	SNP_EI	Don-0|A,ICE106|A,ICE119|A,ICE127|A,ICE130|A,ICE134|A,ICE138|A,ICE150|A,ICE152|A,ICE153|A,ICE181|A,ICE1|A,ICE49|A,ICE50|A,ICE60|A,ICE61|A,ICE70|A,ICE71|A,ICE72|A,ICE75|A,ICE79|A,Koch-1|A,Qui-0|A,Sha|A,Ler-0|A
AT1G18900	6530002-6531273	6530086	C	SNP_EI	Don-0|T,ICE106|T,ICE119|T,ICE127|T,ICE130|T,ICE134|T,ICE138|T,ICE150|T,ICE152|T,ICE153|T,ICE181|T,ICE1|T,ICE49|T,ICE50|T,ICE60|T,ICE61|T,ICE70|T,ICE71|T,ICE72|T,ICE75|T,ICE79|T,Koch-1|T,Qui-0|T,Sha|T,Ler-0|T
AT1G18900	6530102-6531295	6530098	C	SNP_EI	Ler-1|G
AT1G18900	6530102-6531295	6530107	C	SPLICE_SIGNAL_SNP	Don-0|G,ICE106|G,ICE119|G,ICE127|G,ICE130|G,ICE134|G,ICE138|G,ICE150|G,ICE152|G,ICE153|G,ICE181|G,ICE1|G,ICE49|G,ICE50|G,ICE60|G,ICE61|G,ICE70|G,ICE71|G,ICE72|G,ICE75|G,ICE79|G,Koch-1|G,Ped-0|G,Qui-0|G,Sha|G,TueV13|G,Vie-0|G,Ler-0|G
AT1G18900	6530102-6531295	6530119	C	SNP_EI	Ler-1|T
AT1G18900	6530102-6531295	6530128	C	SNP_EI	Agu-1|T,Don-0|T,ICE106|T,ICE119|T,ICE127|T,ICE130|T,ICE134|T,ICE138|T,ICE150|T,ICE152|T,ICE153|T,ICE181|T,ICE1|T,ICE33|T,ICE49|T,ICE50|T,ICE61|T,ICE70|T,ICE71|T,ICE72|T,ICE75|T,ICE79|T,Koch-1|T,Qui-0|T,Ler-0|T
AT1G18900	6530102-6531295	6530216	T	SNP_EI	Ler-1|G
AT1G18900	6530102-6531295	6530225	T	SNP_EI	Agu-1|G,Bak-2|G,Bak-7|G,Del-10|G,Dog-4|G,Don-0|G,HKT2.4|G,ICE104|G,ICE106|G,ICE107|G,ICE119|G,ICE127|G,ICE130|G,ICE134|G,ICE138|G,ICE150|G,ICE152|G,ICE153|G,ICE163|G,ICE169|G,ICE173|G,ICE181|G,ICE1|G,ICE212|G,ICE213|G,ICE29|G,ICE33|G,ICE49|G,ICE50|G,ICE60|G,ICE61|G,ICE70|G,ICE71|G,ICE72|G,ICE73|G,ICE75|G,ICE79|G,ICE7|G,Koch-1|G,Ped-0|G,Qui-0|G,Rue3-1-31|G,Sha|G,TueSB30-3|G,TueV13|G,Vash-1|G,Vie-0…
AT1G18900	6530102-6531295	6530227	G	SNP_EI	ICE106|A,Ler-1|A
AT1G18900	6530102-6531295	6530230	T	SNP_EI	ICE79|C
AT1G18900	6530102-6531295	6530236	G	SNP_EI	Don-0|A,ICE106|A,ICE119|A,ICE127|A,ICE130|A,ICE134|A,ICE138|A,ICE150|A,ICE152|A,ICE153|A,ICE181|A,ICE1|A,ICE49|A,ICE50|A,ICE60|A,ICE61|A,ICE70|A,ICE71|A,ICE72|A,ICE75|A,ICE79|A,Koch-1|A,Qui-0|A,Sha|A,Ler-1|G,Ler-0|A
AT1G18900	6530102-6531295	6530245	A	SNP_EI	Don-0|G,ICE106|G,ICE119|G,ICE127|G,ICE130|G,ICE134|G,ICE138|G,ICE150|G,ICE152|G,ICE153|G,ICE181|G,ICE1|G,ICE49|G,ICE50|G,ICE60|G,ICE61|G,ICE70|G,ICE71|G,ICE72|G,ICE75|G,ICE79|G,Koch-1|G,Ped-0|G,Qui-0|G,Sha|G,TueV13|G,Vie-0|G,Ler-0|G
AT1G18900	6530102-6531295	6530259	G	SNP_EI	ICE61|A,ICE70|A,ICE75|A
AT1G18900	6530102-6531295	6530356	C	SNP_EI	ICE107|G
AT1G18900	6530102-6531295	6530357	A	SNP_EI	Ler-1|G
AT1G18900	6530102-6531295	6530360	T	SNP_EI	Ler-1|C
AT1G18900	6530102-6531295	6530366	A	SNP_EI	Agu-1|G,Bak-2|G,Bak-7|G,Del-10|G,Dog-4|G,Don-0|G,HKT2.4|G,ICE104|G,ICE106|G,ICE107|G,ICE119|G,ICE127|G,ICE130|G,ICE134|G,ICE138|G,ICE150|G,ICE152|G,ICE153|G,ICE163|G,ICE169|G,ICE173|G,ICE181|G,ICE1|G,ICE212|G,ICE213|G,ICE29|G,ICE33|G,ICE49|G,ICE50|G,ICE60|G,ICE61|G,ICE70|G,ICE71|G,ICE72|G,ICE73|G,ICE75|G,ICE79|G,ICE7|G,Koch-1|G,Ped-0|G,Qui-0|G,Rue3-1-31|G,Sha|G,TueSB30-3|G,TueV13|G,Vash-1|G,Vie-0…
AT1G18900	6530102-6531295	6530369	T	SNP_EI	Don-0|C,ICE106|C,ICE119|C,ICE127|C,ICE130|C,ICE134|C,ICE138|C,ICE150|C,ICE152|C,ICE153|C,ICE181|C,ICE1|C,ICE49|C,ICE50|C,ICE60|C,ICE61|C,ICE70|C,ICE71|C,ICE72|C,ICE75|C,ICE79|C,Koch-1|C,Qui-0|C,Sha|C,Ler-0|C
AT1G18900	6530102-6531295	6530422	T	SNP_EI	Ler-1|C
AT1G18900	6530102-6531295	6530427	A	SNP_EI	ICE106|G
AT1G18900	6530102-6531295	6530431	T	SNP_EI	Don-0|C,ICE106|C,ICE119|C,ICE127|C,ICE130|C,ICE134|C,ICE138|C,ICE150|C,ICE152|C,ICE153|C,ICE181|C,ICE1|C,ICE49|C,ICE50|C,ICE60|C,ICE61|C,ICE70|C,ICE71|C,ICE72|C,ICE75|C,ICE79|C,Koch-1|C,Ped-0|C,Qui-0|C,Sha|C,TueV13|C,Vie-0|C,Ler-0|C
AT1G18900	6530102-6531295	6530512	A	SNP_EI	Ler-1|C
AT1G18900	6530102-6531295	6530521	A	SNP_EI	Don-0|C,ICE106|C,ICE119|C,ICE127|C,ICE130|C,ICE134|C,ICE138|C,ICE150|C,ICE152|C,ICE153|C,ICE181|C,ICE1|C,ICE49|C,ICE50|C,ICE60|C,ICE61|C,ICE70|C,ICE71|C,ICE72|C,ICE75|C,ICE79|C,Koch-1|C,Qui-0|C,Sha|C,Ler-1|C,Ler-0|C
AT1G18900	6530102-6531295	6530530	A	SNP_EI	Don-0|C,ICE106|C,ICE119|C,ICE127|C,ICE130|C,ICE134|C,ICE138|C,ICE150|C,ICE152|C,ICE153|C,ICE181|C,ICE1|C,ICE49|C,ICE50|C,ICE60|C,ICE61|C,ICE70|C,ICE71|C,ICE72|C,ICE75|C,ICE79|C,Koch-1|C,Qui-0|C,Sha|C,Ler-0|C
AT1G18900	6530102-6531295	6530548	G	SNP_EI	Ler-1|A
AT1G18900	6530102-6531295	6530557	G	SNP_EI	Don-0|A,ICE106|A,ICE119|A,ICE127|A,ICE130|A,ICE134|A,ICE138|A,ICE150|A,ICE152|A,ICE153|A,ICE181|A,ICE1|A,ICE49|A,ICE50|A,ICE60|A,ICE61|A,ICE70|A,ICE71|A,ICE72|A,ICE75|A,ICE79|A,Koch-1|A,Ped-0|A,Qui-0|A,Sha|A,TueV13|A,Vie-0|A,Ler-0|A
AT1G18900	6530102-6531295	6530572	G	SNP_EI	Ler-1|A
AT1G18900	6530102-6531295	6530581	G	SNP_EI	Don-0|A,ICE106|A,ICE119|A,ICE127|A,ICE130|A,ICE134|A,ICE138|A,ICE150|A,ICE152|A,ICE153|A,ICE181|A,ICE1|A,ICE49|A,ICE50|A,ICE60|A,ICE61|A,ICE70|A,ICE71|A,ICE72|A,ICE75|A,ICE79|A,Koch-1|A,Qui-0|A,Sha|A,Ler-0|A
AT1G18900	6530102-6531295	6530593	C	SNP_EI	ICE1|A
AT1G18900	6530102-6531295	6530608	T	SNP_EI	ICE169|C,ICE173|C,ICE212|C,ICE213|C
AT1G18900	6530102-6531295	6530620	A	SNP_EI	Ler-1|G
AT1G18900	6530102-6531295	6530624	T	SNP_EI	Ler-1|C
AT1G18900	6530102-6531295	6530629	A	SNP_EI	Don-0|G,ICE106|G,ICE119|G,ICE127|G,ICE130|G,ICE134|G,ICE138|G,ICE150|G,ICE152|G,ICE153|G,ICE181|G,ICE1|G,ICE49|G,ICE50|G,ICE60|G,ICE61|G,ICE70|G,ICE71|G,ICE72|G,ICE75|G,ICE79|G,Koch-1|G,Qui-0|G,Sha|G,Ler-0|G
AT1G18900	6530102-6531295	6530633	T	SNP_EI	Don-0|C,ICE106|C,ICE119|C,ICE127|C,ICE130|C,ICE134|C,ICE138|C,ICE150|C,ICE152|C,ICE153|C,ICE181|C,ICE1|C,ICE49|C,ICE50|C,ICE60|C,ICE61|C,ICE70|C,ICE71|C,ICE72|C,ICE75|C,ICE79|C,Koch-1|C,Qui-0|C,Sha|C,Ler-0|C
AT1G18900	6530102-6531295	6530635	A	SNP_EI	Agu-1|C,ICE33|C
AT1G18900	6530102-6531295	6530773	C	SNP_EI	Ler-1|T
AT1G18900	6530102-6531295	6530782	C	SNP_EI	Don-0|T,ICE106|T,ICE119|T,ICE127|T,ICE130|T,ICE134|T,ICE138|T,ICE150|T,ICE152|T,ICE153|T,ICE181|T,ICE1|T,ICE49|T,ICE50|T,ICE60|T,ICE61|T,ICE70|T,ICE71|T,ICE72|T,ICE75|T,ICE79|T,Koch-1|T,Qui-0|T,Sha|T,Ler-0|T
AT1G18900	6530102-6531295	6530785	G	SNP_EI	Ler-1|A
AT1G18900	6530102-6531295	6530791	G	SNP_EI	Ler-1|T
AT1G18900	6530102-6531295	6530794	G	SNP_EI	Don-0|A,ICE106|A,ICE119|A,ICE127|A,ICE130|A,ICE134|A,ICE138|A,ICE150|A,ICE152|A,ICE153|A,ICE181|A,ICE1|A,ICE49|A,ICE50|A,ICE60|A,ICE61|A,ICE70|A,ICE71|A,ICE72|A,ICE75|A,ICE79|A,Koch-1|A,Qui-0|A,Sha|A,Ler-0|A
AT1G18900	6530102-6531295	6530800	G	SNP_EI	Don-0|T,ICE106|T,ICE119|T,ICE127|T,ICE130|T,ICE134|T,ICE138|T,ICE150|T,ICE152|T,ICE153|T,ICE181|T,ICE1|T,ICE49|T,ICE50|T,ICE60|T,ICE61|T,ICE70|T,ICE71|T,ICE72|T,ICE75|T,ICE79|T,Koch-1|T,Qui-0|T,Sha|T,Ler-0|T
AT1G18900	6530102-6531295	6530844	G	SNP_EI	ICE50|A
AT1G18900	6530102-6531295	6530911	G	SNP_EI	ICE93|T
AT1G18900	6530102-6531295	6531017	G	SNP_EI	Ler-1|A
AT1G18900	6530102-6531295	6531026	G	SNP_EI	Don-0|A,ICE127|A,ICE130|A,ICE134|A,ICE138|A,ICE150|A,ICE152|A,ICE153|A,ICE181|A,ICE1|A,ICE49|A,ICE50|A,ICE60|A,ICE61|A,ICE70|A,ICE71|A,ICE72|A,ICE75|A,Koch-1|A,Qui-0|A,Sha|A,Ler-0|A
AT1G18900	6530102-6531295	6531167	G	SNP_EI	Ped-0|A
AT1G18900	6530102-6531295	6531199	C	SNP_EI	Ler-1|T
AT1G18900	6530102-6531295	6531208	C	SNP_EI	Don-0|T,ICE106|T,ICE119|T,ICE127|T,ICE130|T,ICE134|T,ICE138|T,ICE150|T,ICE152|T,ICE153|T,ICE181|T,ICE1|T,ICE49|T,ICE50|T,ICE60|T,ICE61|T,ICE70|T,ICE71|T,ICE72|T,ICE75|T,ICE79|T,Koch-1|T,Qui-0|T,Sha|T,Ler-0|T
AT1G18900	6530102-6531295	6531226	A	SNP_EI	ICE106|G
AT1G19000	6562474-6562619	6562463	C	SNP_EI	Ped-0|T
AT1G19000	6562474-6562619	6562466	A	SNP_EI	Ped-0|C
AT1G19000	6562474-6562619	6562471	T	SNP_EI	Ped-0|C
AT1G19000	6562474-6562619	6562487	A	SNP_EI	Ped-0|T
AT1G19000	6562474-6562619	6562512	A	SNP_EI	ICE163|C
AT1G19700	6810759-6810960	6810774	C	SNP_EI	Ler-1|G
AT1G19700	6810759-6810960	6810776	A	SNP_EI	Ler-1|G
AT1G19700	6810759-6810960	6810777	C	SNP_EI	Ler-1|T
AT1G19700	6810759-6810960	6810783	C	SNP_EI	Del-10|G,Dog-4|G,Don-0|G,Ey15-2|G,ICE104|G,ICE112|G,ICE120|G,ICE127|G,ICE130|G,ICE134|G,ICE138|G,ICE181|G,ICE1|G,ICE21|G,ICE226|G,ICE228|G,ICE49|G,ICE50|G,ICE60|G,ICE61|G,ICE70|G,ICE71|G,ICE72|G,ICE73|G,ICE75|G,ICE79|G,ICE92|G,ICE93|G,Istisu-1|G,Kastel-1|G,Koch-1|G,Lag2.2|G,Lerik1-3|G,Nemrut-1|G,Ped-0|G,Pra-6|G,Rue3-1-31|G,Sha|G,TueSB30-3|G,Vash-1|G,Vie-0|G,Yeg-1|G,Ler-0|G
AT1G19700	6810759-6810960	6810785	A	SNP_EI	Del-10|G,Dog-4|G,Don-0|G,Ey15-2|G,ICE104|G,ICE112|G,ICE120|G,ICE127|G,ICE130|G,ICE134|G,ICE138|G,ICE181|G,ICE1|G,ICE21|G,ICE226|G,ICE228|G,ICE49|G,ICE50|G,ICE60|G,ICE61|G,ICE70|G,ICE71|G,ICE72|G,ICE73|G,ICE75|G,ICE79|G,ICE92|G,ICE93|G,Istisu-1|G,Kastel-1|G,Koch-1|G,Lag2.2|G,Lerik1-3|G,Nemrut-1|G,Ped-0|G,Pra-6|G,Rue3-1-31|G,Sha|G,TueSB30-3|G,Vash-1|G,Vie-0|G,Yeg-1|G,Ler-0|G
AT1G19700	6810759-6810960	6810786	C	SNP_EI	Del-10|T,Dog-4|T,Don-0|T,Ey15-2|T,ICE104|T,ICE112|T,ICE120|T,ICE127|T,ICE130|T,ICE134|T,ICE138|T,ICE181|T,ICE1|T,ICE21|T,ICE226|T,ICE228|T,ICE49|T,ICE50|T,ICE60|T,ICE61|T,ICE70|T,ICE71|T,ICE72|T,ICE73|T,ICE75|T,ICE79|T,ICE92|T,ICE93|T,Istisu-1|T,Kastel-1|T,Koch-1|T,Lag2.2|T,Lerik1-3|T,Nemrut-1|T,Ped-0|T,Pra-6|T,Rue3-1-31|T,Sha|T,TueSB30-3|T,Vash-1|T,Vie-0|T,Yeg-1|T,Ler-0|T
AT1G19700	6810759-6810960	6810829	C	SNP_EI	Del-10|T,ICE21|T
AT1G19700	6810759-6810960	6810837	T	SNP_EI	Ler-1|C
AT1G19700	6810759-6810960	6810846	T	SNP_EI	Agu-1|C,Bak-2|C,Bak-7|C,Cdm-0|C,Del-10|C,Dog-4|C,Don-0|C,Ey15-2|C,HKT2.4|C,ICE102|C,ICE104|C,ICE106|C,ICE107|C,ICE111|C,ICE112|C,ICE119|C,ICE120|C,ICE127|C,ICE130|C,ICE134|C,ICE138|C,ICE150|C,ICE152|C,ICE153|C,ICE181|C,ICE1|C,ICE21|C,ICE226|C,ICE228|C,ICE29|C,ICE33|C,ICE36|C,ICE49|C,ICE50|C,ICE60|C,ICE61|C,ICE63|C,ICE70|C,ICE71|C,ICE72|C,ICE73|C,ICE75|C,ICE79|C,ICE7|C,ICE91|C,ICE92|C,ICE93|C,ICE9…
AT1G19700	6810759-6810960	6810873	T	SNP_EI	Istisu-1|C
AT1G19700	6810759-6810960	6810902	G	SNP_EI	ICE1|A,ICE226|A,ICE228|A,ICE92|A
AT1G19750	6827406-6827531	6827397	C	SNP_EI	Agu-1|T,Bak-2|T,Bak-7|T,Cdm-0|T,Del-10|T,Dog-4|T,Don-0|T,Ey15-2|T,HKT2.4|T,ICE102|T,ICE104|T,ICE107|T,ICE111|T,ICE112|T,ICE119|T,ICE120|T,ICE130|T,ICE134|T,ICE138|T,ICE150|T,ICE153|T,ICE181|T,ICE1|T,ICE21|T,ICE29|T,ICE33|T,ICE36|T,ICE49|T,ICE60|T,ICE61|T,ICE63|T,ICE70|T,ICE71|T,ICE72|T,ICE73|T,ICE75|T,ICE79|T,ICE7|T,ICE91|T,ICE93|T,ICE98|T,Istisu-1|T,Kastel-1|T,Koch-1|T,Lerik1-3|T,Nemrut-1|T,Mer-…
AT1G19750	6827406-6827531	6827403	C	SNP_EI	ICE49|A
AT1G19750	6827406-6827531	6827406	G	BP_SNP	Don-0|A
AT1G19750	6827406-6827531	6827447	T	SNP_EI	ICE107|C
AT1G19750	6827406-6827531	6827450	G	SNP_EI	ICE49|A,ICE50|A
AT1G19750	6827406-6827531	6827454	G	SNP_EI	Ey15-2|A,ICE102|A,ICE120|A,ICE1|A,ICE226|A,ICE228|A,ICE7|A,ICE98|A,Mer-6|A,Star-8|A,WalhaesB4|A
AT1G19750	6827406-6827531	6827501	A	SNP_EI	ICE119|G,ICE91|G
AT1G20180	6997265-6997359	6997269	C	BP_SNP	Ped-0|A
AT1G20180	6997265-6997359	6997271	T	SPLICE_SIGNAL_SNP	Del-10|A,Star-8|A,WalhaesB4|A
AT1G20300	7030189-7030501	7030222	T	SNP_EI	Don-0|A,Ped-0|A
AT1G20300	7030189-7030501	7030228	A	SNP_EI	Don-0|C,Ped-0|C
AT1G20300	7030189-7030501	7030237	C	SNP_EI	Don-0|G,Ped-0|G
AT1G20300	7030189-7030501	7030261	A	SNP_EI	Don-0|G,Ped-0|G
AT1G20300	7030189-7030501	7030312	G	SNP_EI	Don-0|A,Ped-0|A
AT1G20300	7030189-7030501	7030354	A	SNP_EI	Agu-1|T,Cdm-0|T,Del-10|T,Don-0|T,Ey15-2|T,HKT2.4|T,ICE104|T,ICE106|T,ICE107|T,ICE111|T,ICE112|T,ICE119|T,ICE120|T,ICE130|T,ICE134|T,ICE138|T,ICE150|T,ICE152|T,ICE153|T,ICE169|T,ICE173|T,ICE181|T,ICE216|T,ICE21|T,ICE29|T,ICE33|T,ICE36|T,ICE49|T,ICE50|T,ICE63|T,ICE70|T,ICE72|T,ICE75|T,ICE79|T,ICE7|T,ICE92|T,ICE93|T,ICE97|T,Istisu-1|T,Kastel-1|T,Koch-1|T,Lag2.2|T,Lerik1-3|T,Mer-6|T,Ped-0|T,Pra-6|T,Q…
AT1G20300	7030189-7030501	7030375	C	SNP_EI	Agu-1|G,Cdm-0|G,Del-10|G,Don-0|G,Ey15-2|G,HKT2.4|G,ICE104|G,ICE106|G,ICE107|G,ICE111|G,ICE112|G,ICE119|G,ICE120|G,ICE130|G,ICE134|G,ICE138|G,ICE150|G,ICE152|G,ICE153|G,ICE163|G,ICE169|G,ICE173|G,ICE181|G,ICE216|G,ICE21|G,ICE29|G,ICE33|G,ICE36|G,ICE49|G,ICE50|G,ICE63|G,ICE70|G,ICE72|G,ICE75|G,ICE79|G,ICE7|G,ICE92|G,ICE93|G,ICE97|G,Istisu-1|G,Kastel-1|G,Koch-1|G,Lag2.2|G,Lerik1-3|G,Mer-6|G,Ped-0|G,…
AT1G20300	7030189-7030501	7030381	T	SNP_EI	Don-0|C,Ped-0|C
AT1G20300	7030189-7030501	7030390	C	SNP_EI	Cdm-0|T,Ey15-2|T,ICE104|T,ICE106|T,ICE112|T,ICE119|T,ICE130|T,ICE134|T,ICE138|T,ICE150|T,ICE152|T,ICE153|T,ICE163|T,ICE169|T,ICE173|T,ICE181|T,ICE216|T,ICE21|T,ICE33|T,ICE49|T,ICE50|T,ICE63|T,ICE70|T,ICE72|T,ICE75|T,ICE93|T,ICE97|T,Istisu-1|T,Kastel-1|T,Koch-1|T,Lerik1-3|T,Mer-6|T,Pra-6|T,Qui-0|T,Sha|T,Vash-1|T,WalhaesB4|T,Xan-1|T,Yeg-1|T
AT1G20300	7030189-7030501	7030420	T	SNP_EI	Cdm-0|A,Don-0|A,Ey15-2|A,ICE104|A,ICE106|A,ICE112|A,ICE119|A,ICE130|A,ICE134|A,ICE138|A,ICE150|A,ICE152|A,ICE153|A,ICE169|A,ICE173|A,ICE181|A,ICE216|A,ICE21|A,ICE33|A,ICE49|A,ICE50|A,ICE63|A,ICE70|A,ICE72|A,ICE75|A,ICE93|A,ICE97|A,Istisu-1|A,Kastel-1|A,Koch-1|A,Lerik1-3|A,Mer-6|A,Ped-0|A,Pra-6|A,Qui-0|A,Sha|A,Vash-1|A,WalhaesB4|A,Xan-1|A,Yeg-1|A
AT1G20300	7030189-7030501	7030423	G	SNP_EI	Cdm-0|A,Don-0|A,Ey15-2|A,ICE104|A,ICE106|A,ICE112|A,ICE119|A,ICE130|A,ICE134|A,ICE138|A,ICE150|A,ICE152|A,ICE153|A,ICE169|A,ICE173|A,ICE181|A,ICE216|A,ICE21|A,ICE33|A,ICE49|A,ICE50|A,ICE63|A,ICE70|A,ICE72|A,ICE75|A,ICE93|A,ICE97|A,Istisu-1|A,Kastel-1|A,Koch-1|A,Lerik1-3|A,Mer-6|A,Ped-0|A,Pra-6|A,Qui-0|A,Sha|A,Vash-1|A,WalhaesB4|A,Xan-1|A,Yeg-1|A
AT1G20300	7030189-7030501	7030425	C	SNP_EI	ICE138|T,Koch-1|T,Yeg-1|T
AT1G20300	7030189-7030501	7030445	G	SNP_EI	Cdm-0|A,ICE104|A,ICE112|A,ICE119|A,ICE216|A,ICE33|A,ICE97|A,Mer-6|A,Pra-6|A
AT1G20300	7030189-7030501	7030454	G	SNP_EI	Cdm-0|A,Don-0|A,Ey15-2|A,ICE104|A,ICE106|A,ICE112|A,ICE119|A,ICE130|A,ICE134|A,ICE138|A,ICE150|A,ICE152|A,ICE153|A,ICE169|A,ICE173|A,ICE181|A,ICE216|A,ICE21|A,ICE33|A,ICE49|A,ICE50|A,ICE63|A,ICE70|A,ICE72|A,ICE75|A,ICE93|A,ICE97|A,Istisu-1|A,Kastel-1|A,Koch-1|A,Lerik1-3|A,Mer-6|A,Ped-0|A,Pra-6|A,Qui-0|A,Sha|A,Vash-1|A,WalhaesB4|A,Xan-1|A,Yeg-1|A
AT1G21460	7512553-7512653	7512552	A	SPLICE_SIGNAL_SNP	Fei-0|T,Tuescha9|T
AT1G21460	7512553-7512653	7512651	A	SPLICE_SITE_SNP	ICE7|T
AT1G21500	7530163-7530254	7530174	G	SNP_EI	Ler-1|A
AT1G21500	7530163-7530254	7530185	G	SNP_EI	Bak-2|A,Bak-7|A,Del-10|A,Don-0|A,Fei-0|A,HKT2.4|A,ICE150|A,ICE152|A,ICE153|A,ICE181|A,ICE1|A,ICE212|A,ICE213|A,ICE21|A,ICE33|A,ICE50|A,ICE60|A,ICE61|A,ICE71|A,ICE72|A,ICE73|A,ICE79|A,ICE7|A,Koch-1|A,Nemrut-1|A,Pra-6|A,Sha|A,Tuescha9|A,Vash-1|A,Ler-0|A
AT1G21500	7530163-7530254	7530248	C	SPLICE_SIGNAL_SNP	Ler-1|T
AT1G21500	7530163-7530254	7530259	C	SNP_EI	Bak-2|T,Bak-7|T,Del-10|T,Don-0|T,Fei-0|T,HKT2.4|T,ICE150|T,ICE152|T,ICE153|T,ICE163|T,ICE181|T,ICE1|T,ICE212|T,ICE213|T,ICE21|T,ICE33|T,ICE50|T,ICE60|T,ICE61|T,ICE71|T,ICE72|T,ICE73|T,ICE79|T,ICE7|T,Koch-1|T,Nemrut-1|T,Ped-0|T,Pra-6|T,Sha|T,Tuescha9|T,Vash-1|T,Ler-0|T
AT1G21670	7610795-7611641	7610790	A	SNP_EI	ICE130|T,ICE150|T,ICE152|T,ICE153|T,ICE49|T,ICE50|T,ICE60|T,Sha|T
AT1G21670	7610795-7611641	7610831	T	SNP_EI	Dog-4|C,Don-0|C,Fei-0|C,HKT2.4|C,ICE127|C,ICE130|C,ICE134|C,ICE138|C,ICE150|C,ICE152|C,ICE153|C,ICE181|C,ICE1|C,ICE212|C,ICE213|C,ICE21|C,ICE49|C,ICE50|C,ICE60|C,ICE61|C,ICE70|C,ICE71|C,ICE72|C,ICE73|C,ICE75|C,ICE93|C,Istisu-1|C,Koch-1|C,Lerik1-3|C,Ped-0|C,Sha|C,Tuescha9|C,Vash-1|C,Xan-1|C,Yeg-1|C
AT1G21670	7610795-7611641	7610846	C	SNP_EI	Dog-4|G,Don-0|G,Fei-0|G,HKT2.4|G,ICE127|G,ICE134|G,ICE138|G,ICE181|G,ICE1|G,ICE212|G,ICE213|G,ICE21|G,ICE49|G,ICE50|G,ICE61|G,ICE70|G,ICE71|G,ICE72|G,ICE73|G,ICE75|G,ICE93|G,Istisu-1|G,Koch-1|G,Lerik1-3|G,Ped-0|G,Tuescha9|G,Vash-1|G,Xan-1|G,Yeg-1|G
AT1G21670	7610795-7611641	7610849	G	SNP_EI	Istisu-1|T,Lerik1-3|T,Xan-1|T
AT1G21670	7610795-7611641	7610870	A	SNP_EI	Dog-4|T,Don-0|T,Fei-0|T,HKT2.4|T,ICE127|T,ICE130|T,ICE134|T,ICE138|T,ICE150|T,ICE152|T,ICE153|T,ICE181|T,ICE1|T,ICE212|T,ICE213|T,ICE21|T,ICE49|T,ICE50|T,ICE60|T,ICE61|T,ICE70|T,ICE71|T,ICE72|T,ICE73|T,ICE75|T,ICE93|T,Istisu-1|T,Koch-1|T,Lerik1-3|T,Ped-0|T,Sha|T,Tuescha9|T,Vash-1|T,Xan-1|T,Yeg-1|T
AT1G21670	7610795-7611641	7610898	C	SNP_EI	Dog-4|T,ICE127|T,ICE134|T,ICE138|T,ICE1|T,ICE61|T,ICE70|T,ICE75|T,ICE93|T,Koch-1|T,Yeg-1|T
AT1G21670	7610795-7611641	7610914	A	SNP_EI	ICE120|T
AT1G21670	7610795-7611641	7610945	G	SNP_EI	Don-0|A,Ped-0|A
AT1G21670	7610795-7611641	7610948	T	SNP_EI	Dog-4|G,Don-0|G,Fei-0|G,HKT2.4|G,ICE127|G,ICE130|A,ICE134|G,ICE138|G,ICE150|A,ICE152|A,ICE153|A,ICE181|G,ICE1|G,ICE212|G,ICE213|G,ICE21|G,ICE49|G,ICE50|G,ICE60|A,ICE61|G,ICE70|G,ICE71|G,ICE72|G,ICE73|G,ICE75|G,ICE93|G,Istisu-1|G,Koch-1|G,Lerik1-3|G,Ped-0|G,Sha|A,Tuescha9|G,Vash-1|G,Xan-1|G,Yeg-1|G
AT1G21670	7610795-7611641	7610968	C	SNP_EI	Bak-2|G,Bak-7|G
AT1G21670	7610795-7611641	7610972	G	SNP_EI	Dog-4|T,Don-0|T,Fei-0|T,HKT2.4|T,ICE134|T,ICE138|T,ICE181|T,ICE1|T,ICE212|T,ICE213|T,ICE21|T,ICE49|T,ICE50|T,ICE70|T,ICE71|T,ICE72|T,ICE73|T,ICE75|T,ICE93|T,Istisu-1|T,Koch-1|T,Lerik1-3|T,Ped-0|T,Tuescha9|T,Vash-1|T,Xan-1|T,Yeg-1|T
AT1G21670	7610795-7611641	7610976	C	SNP_EI	Dog-4|T,Don-0|T,Fei-0|T,HKT2.4|T,ICE134|T,ICE138|T,ICE181|T,ICE212|T,ICE21|T,ICE49|T,ICE50|T,ICE70|T,ICE71|T,ICE72|T,ICE73|T,ICE75|T,ICE93|T,Istisu-1|T,Koch-1|T,Lerik1-3|T,Ped-0|T,Tuescha9|T,Vash-1|T,Xan-1|T,Yeg-1|T
AT1G21670	7610795-7611641	7610978	T	SNP_EI	Dog-4|A,Don-0|A,Fei-0|A,HKT2.4|A,ICE134|A,ICE181|A,ICE212|A,ICE49|A,ICE70|A,ICE73|A,ICE75|A,ICE93|A,Istisu-1|A,Koch-1|A,Lerik1-3|A,Tuescha9|A,Vash-1|A,Xan-1|A,Yeg-1|A
AT1G21670	7610795-7611641	7610986	T	SNP_EI	ICE130|C,ICE150|C,ICE152|C,ICE153|C,ICE60|C,ICE70|C,Lerik1-3|C,Sha|C
AT1G21670	7610795-7611641	7610987	G	SNP_EI	ICE130|T,ICE150|T,ICE152|T,ICE153|T,ICE60|T,ICE70|T,Sha|T
AT1G21670	7610795-7611641	7610990	T	SNP_EI	ICE130|A,ICE150|A,ICE152|A,ICE153|A,ICE49|A,ICE60|A,ICE61|A,ICE75|A,Sha|A
AT1G21670	7610795-7611641	7610999	C	SNP_EI	Dog-4|T,Fei-0|T,HKT2.4|T,ICE130|T,ICE134|T,ICE150|T,ICE152|T,ICE153|T,ICE181|T,ICE1|T,ICE212|T,ICE213|T,ICE21|T,ICE49|T,ICE60|T,ICE61|T,ICE71|T,ICE73|T,ICE75|T,ICE93|T,Istisu-1|T,Koch-1|T,Lerik1-3|T,Ped-0|T,Sha|T,Tuescha9|T,Vash-1|T,Xan-1|T
AT1G21670	7610795-7611641	7611011	T	SNP_EI	Dog-4|G,Don-0|G,Fei-0|G,HKT2.4|G,ICE127|G,ICE130|G,ICE134|G,ICE138|G,ICE150|G,ICE152|G,ICE153|G,ICE181|G,ICE1|G,ICE212|G,ICE213|G,ICE21|G,ICE49|G,ICE50|G,ICE60|G,ICE61|G,ICE70|G,ICE71|G,ICE72|G,ICE73|G,ICE75|G,ICE93|G,Istisu-1|G,Koch-1|G,Lerik1-3|G,Ped-0|G,Sha|G,Tuescha9|G,Vash-1|G,Xan-1|G,Yeg-1|G
AT1G21670	7610795-7611641	7611017	T	SNP_EI	Dog-4|A,Don-0|A,Fei-0|A,HKT2.4|A,ICE127|A,ICE130|A,ICE134|A,ICE138|A,ICE150|A,ICE153|A,ICE181|A,ICE1|A,ICE212|A,ICE213|A,ICE21|A,ICE49|A,ICE50|A,ICE60|A,ICE61|A,ICE70|A,ICE71|A,ICE72|A,ICE73|A,ICE75|A,ICE93|A,Istisu-1|A,Koch-1|A,Lerik1-3|A,Ped-0|A,Sha|A,Tuescha9|A,Vash-1|A,Xan-1|A,Yeg-1|A
AT1G21670	7610795-7611641	7611041	G	SNP_EI	Don-0|A
AT1G21670	7610795-7611641	7611047	G	SNP_EI	ICE36|C
AT1G21670	7610795-7611641	7611062	C	SNP_EI	Dog-4|A,Don-0|A,Fei-0|A,HKT2.4|A,ICE127|A,ICE134|A,ICE138|A,ICE181|A,ICE1|A,ICE212|A,ICE213|A,ICE21|A,ICE49|A,ICE50|A,ICE61|A,ICE70|A,ICE71|A,ICE72|A,ICE73|A,ICE75|A,ICE93|A,Istisu-1|A,Koch-1|A,Lerik1-3|A,Ped-0|A,Tuescha9|A,Vash-1|A,Xan-1|A,Yeg-1|A
AT1G21670	7610795-7611641	7611068	T	SNP_EI	Dog-4|A,Don-0|A,Fei-0|A,HKT2.4|A,ICE127|A,ICE134|A,ICE138|A,ICE181|A,ICE1|A,ICE212|A,ICE213|A,ICE21|A,ICE49|A,ICE50|A,ICE61|A,ICE70|A,ICE71|A,ICE72|A,ICE73|A,ICE75|A,ICE93|A,Istisu-1|A,Koch-1|A,Lerik1-3|A,Ped-0|A,Tuescha9|A,Vash-1|A,Xan-1|A,Yeg-1|A
AT1G21670	7610795-7611641	7611077	G	SNP_EI	ICE104|T,ICE91|T
AT1G21670	7610795-7611641	7611080	A	SNP_EI	Dog-4|G,Don-0|G,Fei-0|G,HKT2.4|G,ICE127|G,ICE134|G,ICE138|G,ICE181|G,ICE1|G,ICE212|G,ICE213|G,ICE21|G,ICE49|G,ICE50|G,ICE61|G,ICE70|G,ICE71|G,ICE72|G,ICE73|G,ICE75|G,ICE93|G,Istisu-1|G,Koch-1|G,Lerik1-3|G,Ped-0|G,Tuescha9|G,Vash-1|G,Xan-1|G,Yeg-1|G
AT1G21670	7610795-7611641	7611095	T	SNP_EI	Dog-4|C,Don-0|C,Fei-0|C,HKT2.4|C,ICE127|C,ICE134|C,ICE138|C,ICE181|C,ICE1|C,ICE212|C,ICE213|C,ICE21|C,ICE49|C,ICE50|C,ICE61|C,ICE70|C,ICE71|C,ICE72|C,ICE73|C,ICE75|C,ICE93|C,Istisu-1|C,Koch-1|C,Lerik1-3|C,Ped-0|C,Tuescha9|C,Vash-1|C,Xan-1|C,Yeg-1|C
AT1G21670	7610795-7611641	7611185	G	SNP_EI	ICE21|A
AT1G21670	7610795-7611641	7611209	C	SNP_EI	Dog-4|T,Don-0|T,Fei-0|T,HKT2.4|T,ICE127|T,ICE134|T,ICE138|T,ICE181|T,ICE1|T,ICE212|T,ICE213|T,ICE21|T,ICE49|T,ICE50|T,ICE61|T,ICE70|T,ICE71|T,ICE72|T,ICE73|T,ICE75|T,ICE93|T,Istisu-1|T,Koch-1|T,Lerik1-3|T,Ped-0|T,Tuescha9|T,Vash-1|T,Xan-1|T,Yeg-1|T
AT1G21670	7610795-7611641	7611217	G	SNP_EI	ICE7|A
AT1G21670	7610795-7611641	7611225	A	SNP_EI	ICE112|C
AT1G21670	7610795-7611641	7611242	T	SNP_EI	ICE29|C
AT1G21670	7610795-7611641	7611260	G	SNP_EI	Dog-4|T,ICE127|T,ICE134|T,ICE138|T,ICE1|T,ICE61|T,ICE70|T,ICE75|T,ICE93|T,Koch-1|T,Yeg-1|T
AT1G21670	7610795-7611641	7611265	C	SNP_EI	Dog-4|A,Don-0|A,Fei-0|A,HKT2.4|A,ICE127|A,ICE130|A,ICE134|A,ICE138|A,ICE150|A,ICE152|A,ICE153|A,ICE181|A,ICE1|A,ICE212|A,ICE213|A,ICE21|A,ICE49|A,ICE50|A,ICE60|A,ICE61|A,ICE70|A,ICE71|A,ICE72|A,ICE73|A,ICE75|A,ICE93|A,Istisu-1|A,Koch-1|A,Lerik1-3|A,Ped-0|A,Sha|A,Tuescha9|A,Vash-1|A,Xan-1|A,Yeg-1|A
AT1G21670	7610795-7611641	7611268	C	SNP_EI	ICE130|T,ICE150|T,ICE152|T,ICE153|T,ICE60|T,Sha|T
AT1G21670	7610795-7611641	7611273	T	SNP_EI	Dog-4|A,Don-0|A,Fei-0|A,HKT2.4|A,ICE127|A,ICE134|A,ICE138|A,ICE181|A,ICE1|A,ICE212|A,ICE213|A,ICE21|A,ICE49|A,ICE50|A,ICE61|A,ICE70|A,ICE71|A,ICE72|A,ICE73|A,ICE75|A,ICE93|A,Istisu-1|A,Koch-1|A,Lerik1-3|A,Ped-0|A,Tuescha9|A,Vash-1|A,Xan-1|A,Yeg-1|A
AT1G21670	7610795-7611641	7611296	A	SNP_EI	ICE130|C,ICE150|C,ICE152|C,ICE153|C,ICE60|C,Sha|C
AT1G21670	7610795-7611641	7611314	T	SNP_EI	ICE130|G,ICE150|G,ICE152|G,ICE153|G,ICE60|G,Sha|G
AT1G21670	7610795-7611641	7611315	T	SNP_EI	ICE49|C,ICE50|C,Istisu-1|C,Lerik1-3|C,Xan-1|C
AT1G21670	7610795-7611641	7611335	A	SNP_EI	ICE130|C,ICE150|C,ICE152|C,ICE153|C,ICE60|C,Sha|C
AT1G21670	7610795-7611641	7611353	C	SNP_EI	ICE130|T,ICE150|T,ICE152|T,ICE153|T,ICE60|T,Sha|T
AT1G21670	7610795-7611641	7611356	G	SNP_EI	ICE130|A,ICE150|A,ICE152|A,ICE153|A,ICE60|A,Sha|A
AT1G21670	7610795-7611641	7611417	A	SNP_EI	ICE120|C
AT1G21670	7610795-7611641	7611482	C	SNP_EI	ICE50|A
AT1G21670	7610795-7611641	7611515	C	SNP_EI	ICE130|T,ICE150|T,ICE152|T,ICE153|T,ICE60|T,Sha|T
AT1G21670	7610795-7611641	7611521	T	SNP_EI	ICE130|C,ICE150|C,ICE152|C,ICE153|C,ICE60|C,Sha|C
AT1G21670	7610795-7611641	7611541	C	SNP_EI	ICE130|A,ICE150|A,ICE152|A,ICE153|A,ICE60|A,Sha|A
AT1G21670	7610795-7611641	7611548	G	SNP_EI	ICE130|C,ICE150|C,ICE152|C,ICE153|C,ICE60|C,Sha|C
AT1G21670	7610795-7611641	7611572	A	SNP_EI	ICE130|C,ICE150|C,ICE152|C,ICE153|C,ICE60|C,Sha|C
AT1G21670	7610795-7611641	7611578	A	SNP_EI	ICE130|C,ICE150|C,ICE152|C,ICE153|C,ICE60|C,Sha|C
AT1G21670	7610795-7611641	7611587	C	SNP_EI	ICE181|T,ICE212|T,ICE213|T
AT1G21670	7610795-7611641	7611639	A	SPLICE_SITE_SNP	ICE130|C,ICE150|C,ICE152|C,ICE153|C,ICE60|C,Sha|C
AT1G21670	7610795-7611641	7611641	A	SPLICE_SIGNAL_SNP	ICE181|T,ICE212|T,ICE213|T
AT1G21920	7705039-7705119	7705037	A	SPLICE_SIGNAL_SNP	ICE226|G,ICE228|G,ICE63|G
AT1G21920	7705039-7705119	7705069	A	SNP_EI	ICE111|T,Nie1-2|T
AT1G21920	7705039-7705119	7705096	G	SNP_EI	Star-8|A
AT1G21920	7705526-7705642	7705520	A	SNP_EI	Ler-1|G
AT1G21920	7705526-7705642	7705531	A	SPLICE_SIGNAL_SNP	Agu-1|G,Bak-2|G,Bak-7|G,Del-10|G,Ey15-2|G,Fei-0|G,ICE106|G,ICE107|G,ICE21|G,ICE226|G,ICE228|G,ICE49|G,ICE50|G,ICE63|G,ICE92|G,ICE97|G,ICE98|G,Istisu-1|G,Kastel-1|G,Lag2.2|G,Lerik1-3|G,Nemrut-1|G,Mer-6|G,Pra-6|G,Rue3-1-31|G,Star-8|G,Tuescha9|G,TueWa1-2|G,Vash-1|G,Vie-0|G,Xan-1|G,Ler-0|G
AT1G21920	7705526-7705642	7705541	A	SNP_EI	Agu-1|G,ICE106|G,ICE226|G,ICE228|G,ICE49|G,ICE63|G,ICE98|G,Kastel-1|G,Lag2.2|G,Lerik1-3|G,Nemrut-1|G,Mer-6|G,Pra-6|G,Rue3-1-31|G,Star-8|G,Xan-1|G
AT1G21920	7705526-7705642	7705543	T	SNP_EI	ICE169|C,ICE173|C,ICE79|C,TueSB30-3|C,WalhaesB4|C
AT1G21920	7705526-7705642	7705544	A	SNP_EI	Ler-1|G
AT1G21920	7705526-7705642	7705546	A	SNP_EI	ICE104|G,ICE91|G
AT1G21920	7705526-7705642	7705555	A	SNP_EI	Bak-2|G,Bak-7|G,Del-10|G,Ey15-2|G,Fei-0|G,ICE107|G,ICE119|G,ICE21|G,ICE50|G,ICE92|G,ICE97|G,Istisu-1|G,Tuescha9|G,TueWa1-2|G,Vash-1|G,Vie-0|G,Ler-0|G
AT1G21920	7705526-7705642	7705570	G	SNP_EI	ICE98|A
AT1G21920	7705526-7705642	7705606	G	SNP_EI	Agu-1|T
AT1G21920	7705526-7705642	7705624	T	SNP_EI	Agu-1|G,Bak-2|G,Bak-7|G,Don-0|G,Ey15-2|G,Fei-0|G,ICE106|G,ICE119|G,ICE21|G,ICE226|G,ICE228|G,ICE49|G,ICE63|G,ICE97|G,ICE98|G,Kastel-1|G,Lag2.2|G,Lerik1-3|G,Nemrut-1|G,Mer-6|G,Ped-0|G,Pra-6|G,Rue3-1-31|G,Star-8|G,Tuescha9|G,TueWa1-2|G,Xan-1|G
AT1G22310	7883125-7883197	7883110	T	SNP_EI	Don-0|C
AT1G22310	7883125-7883197	7883156	A	SNP_EI	Don-0|C
AT1G22310	7883125-7883197	7883157	T	SNP_EI	Don-0|A
AT1G22310	7883125-7883197	7883159	A	SNP_EI	Don-0|C
AT1G22310	7883125-7883197	7883186	A	SNP_EI	Don-0|T
AT1G22430	7919749-7919832	7919780	A	SNP_EI	Vie-0|C
AT1G22450	7926046-7926185	7926063	C	SNP_EI	Agu-1|T,ICE1|T,ICE216|T,ICE97|T,Leo-1|T
AT1G22450	7926046-7926185	7926109	G	SNP_EI	Star-8|A
AT1G22530	7957759-7958126	7957782	C	SNP_EI	Ler-1|A
AT1G22530	7957759-7958126	7957783	C	SNP_EI	Istisu-1|T,Xan-1|T
AT1G22530	7957759-7958126	7957793	C	SNP_EI	Agu-1|A,Bak-2|A,Bak-7|A,Cdm-0|A,Del-10|A,Dog-4|A,Don-0|A,Ey15-2|A,Fei-0|A,HKT2.4|A,ICE102|A,ICE104|A,ICE106|A,ICE111|A,ICE112|A,ICE119|A,ICE120|A,ICE127|A,ICE130|A,ICE134|A,ICE138|A,ICE150|A,ICE152|A,ICE153|A,ICE163|A,ICE169|A,ICE173|A,ICE181|A,ICE1|A,ICE212|A,ICE213|A,ICE216|A,ICE21|A,ICE226|A,ICE228|A,ICE29|A,ICE33|A,ICE36|A,ICE49|A,ICE50|A,ICE60|A,ICE61|A,ICE63|A,ICE70|A,ICE71|A,ICE72|A,ICE73|…
AT1G22530	7957759-7958126	7957794	G	SNP_EI	Ler-1|T
AT1G22530	7957759-7958126	7957796	T	SNP_EI	Ler-1|C
AT1G22530	7957759-7958126	7957804	A	SNP_EI	Agu-1|G,Bak-2|G,Bak-7|G,Cdm-0|G,Del-10|G,Dog-4|G,Don-0|G,Ey15-2|G,Fei-0|G,HKT2.4|G,ICE102|G,ICE104|G,ICE106|G,ICE111|G,ICE112|G,ICE119|G,ICE120|G,ICE130|G,ICE134|G,ICE138|G,ICE150|G,ICE152|G,ICE153|G,ICE163|G,ICE169|G,ICE173|G,ICE181|G,ICE1|G,ICE212|G,ICE213|G,ICE216|G,ICE21|G,ICE226|G,ICE228|G,ICE29|G,ICE33|G,ICE36|G,ICE49|G,ICE50|G,ICE60|G,ICE61|G,ICE63|G,ICE70|G,ICE71|G,ICE72|G,ICE73|G,ICE75|G…
AT1G22530	7957759-7958126	7957805	G	SNP_EI	Agu-1|T,Bak-2|T,Bak-7|T,Cdm-0|T,Del-10|T,Don-0|T,Ey15-2|T,Fei-0|T,HKT2.4|T,ICE102|T,ICE104|T,ICE106|T,ICE111|T,ICE112|T,ICE119|T,ICE120|T,ICE130|T,ICE134|T,ICE138|T,ICE150|T,ICE152|T,ICE153|T,ICE163|T,ICE169|T,ICE173|T,ICE181|T,ICE1|T,ICE212|T,ICE213|T,ICE216|T,ICE21|T,ICE226|T,ICE228|T,ICE29|T,ICE33|T,ICE36|T,ICE49|T,ICE50|T,ICE60|T,ICE61|T,ICE63|T,ICE70|T,ICE71|T,ICE72|T,ICE73|T,ICE75|T,ICE79|T…
AT1G22530	7957759-7958126	7957807	T	SNP_EI	Agu-1|C,Bak-2|C,Bak-7|C,Cdm-0|C,Del-10|C,Dog-4|C,Don-0|C,Ey15-2|C,Fei-0|C,HKT2.4|C,ICE102|C,ICE104|C,ICE106|C,ICE111|C,ICE112|C,ICE119|C,ICE120|C,ICE130|C,ICE134|C,ICE138|C,ICE150|C,ICE152|C,ICE153|C,ICE163|C,ICE169|C,ICE173|C,ICE181|C,ICE1|C,ICE212|C,ICE213|C,ICE216|C,ICE21|C,ICE226|C,ICE228|C,ICE29|C,ICE33|C,ICE36|C,ICE49|C,ICE50|C,ICE60|C,ICE61|C,ICE63|C,ICE70|C,ICE71|C,ICE72|C,ICE73|C,ICE75|C…
AT1G22530	7957759-7958126	7957845	G	SNP_EI	ICE7|T
AT1G22530	7957759-7958126	7957961	A	SNP_EI	Agu-1|C,Vie-0|C
AT1G22530	7957759-7958126	7958050	C	SNP_EI	ICE150|G,ICE152|G,ICE153|G,ICE49|G,Koch-1|G,Sha|G,Yeg-1|G
AT1G22790	8070426-8070559	8070516	G	SNP_EI	ICE119|A
AT1G23130	8200478-8200590	8200463	A	SNP_EI	ICE33|G,ICE49|G
AT1G23130	8200478-8200590	8200472	A	SNP_EI	ICE33|G,ICE49|G
AT1G23130	8200478-8200590	8200496	A	SNP_EI	Agu-1|C,ICE127|C,ICE130|C,ICE134|C,ICE150|C,ICE152|C,ICE153|C,ICE181|C,ICE216|C,ICE33|C,ICE49|C,ICE70|C,ICE72|C,ICE73|C,Sha|C
AT1G23130	8200478-8200590	8200530	G	SNP_EI	ICE7|A
AT1G23130	8200478-8200590	8200562	T	SNP_EI	ICE93|A
AT1G23130	8200478-8200590	8200569	C	SNP_EI	Cdm-0|T,Del-10|T,ICE163|T,ICE169|T,ICE173|T,ICE29|T,ICE61|T,ICE63|T,ICE75|T,Koch-1|T,Leo-1|T,Nie1-2|T,Qui-0|T,Yeg-1|T
AT1G23740	8398954-8399051	8398957	A	SPLICE_SIGNAL_SNP	Ler-1|G
AT1G23740	8398954-8399051	8398967	C	SNP_EI	ICE91|T,Nemrut-1|T,Vash-1|T
AT1G23740	8398954-8399051	8398968	A	SNP_EI	Agu-1|G,Bak-2|G,Bak-7|G,Dog-4|G,Don-0|G,Ey15-2|G,Fei-0|G,ICE106|G,ICE107|G,ICE111|G,ICE119|G,ICE120|G,ICE127|G,ICE130|G,ICE134|G,ICE138|G,ICE1|G,ICE29|G,ICE33|G,ICE49|G,ICE50|G,ICE60|G,ICE61|G,ICE63|G,ICE70|G,ICE71|G,ICE72|G,ICE73|G,ICE75|G,ICE7|G,ICE91|G,ICE97|G,ICE98|G,Istisu-1|G,Kastel-1|G,Koch-1|G,Lag2.2|G,Nemrut-1|G,Mer-6|G,Nie1-2|G,Ped-0|G,Pra-6|G,Star-8|G,Vash-1|G,Vie-0|G,Xan-1|G,Yeg-1|G,L…
AT1G23740	8398954-8399051	8399025	C	SNP_EI	ICE106|T,ICE119|T,Mer-6|T
AT1G23740	8398954-8399051	8399026	A	SNP_EI	Ler-1|G
AT1G23740	8398954-8399051	8399029	C	SNP_EI	Ler-1|T
AT1G23740	8398954-8399051	8399037	A	SNP_EI	Agu-1|G,Bak-2|G,Bak-7|G,Dog-4|G,Don-0|G,Ey15-2|G,Fei-0|G,ICE106|G,ICE107|G,ICE111|G,ICE119|G,ICE120|G,ICE127|G,ICE130|G,ICE134|G,ICE138|G,ICE1|G,ICE29|G,ICE33|G,ICE36|G,ICE49|G,ICE50|G,ICE60|G,ICE61|G,ICE63|G,ICE70|G,ICE71|G,ICE72|G,ICE73|G,ICE75|G,ICE7|G,ICE91|G,ICE97|G,ICE98|G,Istisu-1|G,Kastel-1|G,Koch-1|G,Lag2.2|G,Nemrut-1|G,Mer-6|G,Nie1-2|G,Ped-0|G,Pra-6|G,Star-8|G,Vash-1|G,Vie-0|G,Xan-1|G,Y…
AT1G23740	8398954-8399051	8399040	C	SNP_EI	Agu-1|T,Bak-2|T,Bak-7|T,Dog-4|T,Don-0|T,Ey15-2|T,Fei-0|T,ICE106|T,ICE107|T,ICE111|T,ICE119|T,ICE120|T,ICE127|T,ICE130|T,ICE134|T,ICE138|T,ICE1|T,ICE29|T,ICE33|T,ICE49|T,ICE50|T,ICE60|T,ICE61|T,ICE63|T,ICE70|T,ICE71|T,ICE72|T,ICE73|T,ICE75|T,ICE7|T,ICE91|T,ICE97|T,ICE98|T,Istisu-1|T,Kastel-1|T,Koch-1|T,Lag2.2|T,Nemrut-1|T,Mer-6|T,Nie1-2|T,Ped-0|T,Pra-6|T,Star-8|T,Vash-1|T,Vie-0|T,Xan-1|T,Yeg-1|T,L…
AT1G23740	8398954-8399051	8399041	T	SPLICE_SIGNAL_SNP	ICE212|C,ICE213|C
AT1G26260	9087391-9087458	9087410	T	SNP_EI	Agu-1|G,HKT2.4|G,ICE102|G,ICE49|G,ICE50|G,Kastel-1|G,Star-8|G,Vie-0|G
AT1G26260	9087391-9087458	9087432	T	SNP_EI	Agu-1|C,HKT2.4|C,ICE102|C,ICE49|C,ICE50|C,Kastel-1|C,Star-8|C,Vie-0|C
AT1G26260	9087391-9087458	9087467	A	SNP_EI	Vash-1|C
AT1G26270	9090055-9091708	9090118	T	SNP_EI	ICE130|C,ICE134|C,ICE150|C,ICE152|C,ICE61|C,ICE70|C,ICE72|C,Sha|C,Yeg-1|C
AT1G26270	9090055-9091708	9090134	A	SNP_EI	ICE63|T,ICE98|T
AT1G26270	9090055-9091708	9090190	C	SNP_EI	WalhaesB4|T
AT1G26270	9090055-9091708	9090281	T	SNP_EI	Agu-1|C,Bak-2|C,Bak-7|C,Cdm-0|C,Del-10|C,Dog-4|C,Don-0|C,Ey15-2|C,Fei-0|C,HKT2.4|C,ICE102|C,ICE104|C,ICE106|C,ICE107|C,ICE111|C,ICE112|C,ICE119|C,ICE120|C,ICE127|C,ICE130|C,ICE134|C,ICE150|C,ICE152|C,ICE153|C,ICE181|C,ICE1|C,ICE21|C,ICE29|C,ICE33|C,ICE36|C,ICE49|C,ICE50|C,ICE60|C,ICE61|C,ICE63|C,ICE70|C,ICE72|C,ICE75|C,ICE7|C,ICE91|C,ICE92|C,ICE93|C,ICE97|C,ICE98|C,Istisu-1|C,Kastel-1|C,Koch-1|C,…
AT1G26270	9090055-9091708	9090444	T	SNP_EI	Lag2.2|C,Lerik1-3|C
AT1G26270	9090055-9091708	9090533	T	SNP_EI	Vie-0|C
AT1G26270	9090606-9091622	9091178	C	SNP_EI	Agu-1|T,HKT2.4|T,ICE102|T,ICE49|T,ICE50|T,Kastel-1|T,Star-8|T,Vie-0|T
AT1G26270	9090606-9091622	9091323	T	SNP_EI	ICE216|A
AT1G26270	9090606-9091622	9091338	A	SNP_EI	Bak-7|T,Istisu-1|T
AT1G26270	9090606-9091622	9091351	T	SNP_EI	Don-0|C,Ped-0|C
AT1G26440	9145195-9145301	9145292	C	SPLICE_SIGNAL_SNP	ICE226|A,ICE228|A
AT1G27840	9695767-9695892	9695866	T	SNP_EI	ICE21|G
AT1G28430	9993511-9993596	9993565	A	SNP_EI	ICE1|C
AT1G28430	9993511-9993596	9993583	T	SNP_EI	Ler-1|G
AT1G28430	9993511-9993596	9993584	T	SNP_EI	Ler-1|C
AT1G28430	9993511-9993596	9993597	T	SPLICE_SIGNAL_SNP	Cdm-0|G,Ey15-2|G,HKT2.4|G,ICE106|G,ICE127|G,ICE130|G,ICE134|G,ICE150|G,ICE152|G,ICE153|G,ICE212|G,ICE213|G,ICE216|G,ICE21|G,ICE226|G,ICE228|G,ICE70|G,ICE71|G,ICE72|G,ICE73|G,ICE75|G,ICE79|G,Kastel-1|G,Sha|G,Star-8|G,Tuescha9|G,TueWa1-2|G,Vie-0|G,Yeg-1|G,Ler-0|G
AT1G28430	9993511-9993596	9993598	T	SPLICE_SIGNAL_SNP	Cdm-0|C,Ey15-2|C,HKT2.4|C,ICE106|C,ICE127|C,ICE130|C,ICE134|C,ICE150|C,ICE152|C,ICE153|C,ICE212|C,ICE213|C,ICE216|C,ICE21|C,ICE226|C,ICE228|C,ICE70|C,ICE71|C,ICE72|C,ICE73|C,ICE75|C,ICE79|C,Kastel-1|C,Sha|C,Star-8|C,Tuescha9|C,TueWa1-2|C,Vie-0|C,Yeg-1|C,Ler-0|C
AT1G28430	9993511-9993596	9993608	G	SNP_EI	Ler-1|A
AT1G28440	9997222-9997631	9997225	C	BP_SNP	ICE1|T
AT1G28440	9997222-9997631	9997248	C	SNP_EI	ICE21|G
AT1G28440	9997222-9997631	9997307	C	SNP_EI	Don-0|T
AT1G28440	9997222-9997631	9997312	T	SNP_EI	Agu-1|C
AT1G28440	9997222-9997631	9997351	T	SNP_EI	Agu-1|C
AT1G28440	9997222-9997631	9997354	C	SNP_EI	Agu-1|T,Rue3-1-31|T,WalhaesB4|T
AT1G28440	9997222-9997631	9997363	G	SNP_EI	Agu-1|A
AT1G28440	9997222-9997631	9997378	C	SNP_EI	Agu-1|T
AT1G28440	9997222-9997631	9997454	A	SNP_EI	Agu-1|T
AT1G28440	9997222-9997631	9997456	G	SNP_EI	Agu-1|C
AT1G28440	9997222-9997631	9997486	C	SNP_EI	Agu-1|G
AT1G28440	9997222-9997631	9997600	T	SNP_EI	Agu-1|C
AT1G28610	10054510-10054615	10054587	T	SNP_EI	ICE29|G,ICE72|G,Yeg-1|G
AT1G29900	10468440-10469045	10468432	A	SNP_EI	Nemrut-1|T
AT1G29900	10468440-10469045	10468631	T	SNP_EI	ICE104|C,ICE119|C,ICE91|C,Mer-6|C
AT1G29900	10468440-10469045	10468640	G	SNP_EI	Del-10|A,ICE7|A,ICE92|A
AT1G29900	10468440-10469045	10468673	G	SNP_EI	Bak-2|A
AT1G29900	10468440-10469045	10468796	T	SNP_EI	Bak-7|A,Dog-4|A
AT1G29900	10468440-10469045	10468820	T	SNP_EI	Cdm-0|C,ICE111|C
AT1G29900	10468440-10469045	10469020	C	SNP_EI	Vie-0|T
AT1G29900	10468440-10469045	10469033	G	SNP_EI	Don-0|C
AT1G29900	10468440-10469045	10469048	A	SNP_EI	ICE49|G,ICE50|G
AT1G30000	10511207-10511590	10511198	T	SNP_EI	ICE106|C,ICE107|C,ICE120|C,ICE93|C
AT1G30000	10511207-10511590	10511446	T	SNP_EI	Vie-0|A
AT1G30130	10587810-10587895	10587840	G	SNP_EI	Don-0|A
AT1G30130	10587810-10587895	10587854	C	SNP_EI	ICE127|T,ICE130|T,ICE134|T,ICE21|T,ICE70|T,ICE72|T,ICE75|T,Sha|T,Yeg-1|T
AT1G30130	10587810-10587895	10587885	A	SPLICE_SIGNAL_SNP	Ler-1|C
AT1G30130	10587810-10587895	10587901	A	SNP_EI	Bak-2|C,Bak-7|C,Del-10|C,Dog-4|C,Don-0|C,Ey15-2|C,ICE106|C,ICE127|C,ICE130|C,ICE134|C,ICE138|C,ICE150|C,ICE152|C,ICE153|C,ICE169|C,ICE173|C,ICE181|C,ICE1|C,ICE212|C,ICE213|C,ICE216|C,ICE21|C,ICE226|C,ICE228|C,ICE29|C,ICE33|C,ICE36|C,ICE50|C,ICE60|C,ICE61|C,ICE63|C,ICE70|C,ICE71|C,ICE72|C,ICE73|C,ICE75|C,ICE79|C,ICE7|C,Istisu-1|C,Kastel-1|C,Koch-1|C,Lag2.2|C,Lerik1-3|C,Nemrut-1|C,Mer-6|C,Nie1-2|C,…
AT1G30360	10718511-10718611	10718619	C	SNP_EI	TueWa1-2|T
AT1G31860	11435001-11435078	11435052	G	SNP_EI	Ler-1|T
AT1G31860	11435001-11435078	11435072	G	SPLICE_SIGNAL_SNP	Don-0|T,Ey15-2|T,HKT2.4|T,ICE104|T,ICE106|T,ICE107|T,ICE111|T,ICE112|T,ICE120|T,ICE127|T,ICE134|T,ICE138|T,ICE150|T,ICE152|T,ICE153|T,ICE169|T,ICE173|T,ICE1|T,ICE212|T,ICE213|T,ICE216|T,ICE21|T,ICE226|T,ICE228|T,ICE49|T,ICE50|T,ICE60|T,ICE61|T,ICE70|T,ICE71|T,ICE72|T,ICE73|T,ICE79|T,ICE7|T,ICE91|T,ICE92|T,ICE93|T,ICE97|T,Istisu-1|T,Leo-1|T,Lerik1-3|T,Nie1-2|T,Pra-6|T,Qui-0|T,Sha|T,Star-8|T,TueSB3…
AT1G32340	11664378-11664442	11664393	A	SNP_EI	Agu-1|G,ICE49|G,Leo-1|G,TueV13|G,Vie-0|G
AT1G32340	11664378-11664442	11664441	C	SPLICE_SITE_SNP	Agu-1|G,Ey15-2|T,ICE169|T,ICE173|T,ICE181|T,ICE226|T,ICE228|T,ICE49|G,Leo-1|G,TueV13|G,Vie-0|G
AT1G32360	11673853-11674113	11673876	A	SNP_EI	Vash-1|C
AT1G32360	11673853-11674113	11673885	T	SNP_EI	ICE33|C,Lag2.2|C
AT1G32360	11673853-11674113	11673891	T	SNP_EI	Bak-2|C,Del-10|C,Dog-4|C,Don-0|C,Ey15-2|C,Fei-0|C,HKT2.4|C,ICE111|C,ICE127|C,ICE130|C,ICE134|C,ICE169|C,ICE173|C,ICE181|C,ICE1|C,ICE212|C,ICE213|C,ICE216|C,ICE21|C,ICE226|C,ICE228|C,ICE29|C,ICE36|C,ICE49|C,ICE60|C,ICE61|C,ICE70|C,ICE71|C,ICE72|C,ICE73|C,ICE75|C,ICE79|C,ICE7|C,ICE92|C,ICE93|C,Istisu-1|C,Kastel-1|C,Lerik1-3|C,Nemrut-1|C,Mer-6|C,Nie1-2|C,Qui-0|C,Rue3-1-31|C,Sha|C,Star-8|C,TueSB30-3|…
AT1G32360	11673853-11674113	11673897	A	SNP_EI	Agu-1|G,Bak-2|G,Del-10|G,Dog-4|G,Don-0|G,Ey15-2|G,Fei-0|G,HKT2.4|G,ICE111|G,ICE127|G,ICE130|G,ICE134|G,ICE169|G,ICE173|G,ICE181|G,ICE1|G,ICE212|G,ICE213|G,ICE216|G,ICE21|G,ICE226|G,ICE228|G,ICE29|G,ICE49|G,ICE50|G,ICE60|G,ICE61|G,ICE70|G,ICE71|G,ICE72|G,ICE73|G,ICE75|G,ICE79|G,ICE7|G,ICE92|G,ICE93|G,ICE97|G,ICE98|G,Istisu-1|G,Kastel-1|G,Koch-1|G,Leo-1|G,Lerik1-3|G,Nemrut-1|G,Mer-6|G,Nie1-2|G,Ped-…
AT1G32360	11673853-11674113	11673910	C	SNP_EI	Bak-2|T,Del-10|T,Dog-4|T,Don-0|T,Ey15-2|T,Fei-0|T,HKT2.4|T,ICE111|T,ICE127|T,ICE130|T,ICE134|T,ICE169|T,ICE173|T,ICE181|T,ICE1|T,ICE212|T,ICE213|T,ICE216|T,ICE21|T,ICE226|T,ICE228|T,ICE29|T,ICE49|T,ICE60|T,ICE61|T,ICE70|T,ICE71|T,ICE72|T,ICE73|T,ICE75|T,ICE79|T,ICE7|T,ICE92|T,ICE93|T,Istisu-1|T,Kastel-1|T,Lerik1-3|T,Nemrut-1|T,Mer-6|T,Nie1-2|T,Qui-0|T,Rue3-1-31|T,Sha|T,Star-8|T,TueSB30-3|T,Vash-1…
AT1G32360	11673853-11674113	11673939	G	SNP_EI	Agu-1|A,ICE50|A,ICE97|A,ICE98|A,Koch-1|A,Leo-1|A,Ped-0|A,TueV13|A,TueWa1-2|A,Vie-0|A,WalhaesB4|A
AT1G32360	11673853-11674113	11673954	C	SNP_EI	Agu-1|T,Bak-2|T,Del-10|T,Dog-4|T,Don-0|T,Ey15-2|T,Fei-0|T,HKT2.4|T,ICE111|T,ICE127|T,ICE130|T,ICE134|T,ICE163|T,ICE169|T,ICE173|T,ICE181|T,ICE1|T,ICE212|T,ICE213|T,ICE216|T,ICE21|T,ICE226|T,ICE228|T,ICE29|T,ICE49|T,ICE50|T,ICE60|T,ICE61|T,ICE70|T,ICE71|T,ICE72|T,ICE73|T,ICE75|T,ICE79|T,ICE7|T,ICE92|T,ICE93|T,ICE97|T,ICE98|T,Istisu-1|T,Kastel-1|T,Koch-1|T,Leo-1|T,Lerik1-3|T,Nemrut-1|T,Mer-6|T,Nie1…
AT1G32360	11673853-11674113	11673980	G	SNP_EI	Bak-2|C,Don-0|C,HKT2.4|C,ICE111|C,ICE130|C,ICE134|C,ICE169|C,ICE173|C,ICE181|C,ICE1|C,ICE212|C,ICE216|C,ICE226|C,ICE29|C,ICE49|C,ICE60|C,ICE61|C,ICE70|C,ICE71|C,ICE72|C,ICE75|C,ICE79|C,ICE92|C,Istisu-1|C,Kastel-1|C,Lerik1-3|C,Nie1-2|C,Sha|C,Star-8|C,Vash-1|C,Xan-1|C
AT1G32360	11673853-11674113	11673984	T	SNP_EI	Agu-1|A,Ey15-2|A,HKT2.4|A,ICE111|A,ICE169|A,ICE173|A,ICE181|A,ICE212|A,ICE216|A,ICE49|A,ICE70|A,ICE72|A,ICE75|A,ICE97|A,Leo-1|A,Lerik1-3|A,Nie1-2|A,TueV13|A,TueWa1-2|A
AT1G32360	11673853-11674113	11673985	G	SNP_EI	Ey15-2|A,Fei-0|A,HKT2.4|A,ICE169|A,ICE173|A,ICE181|A,ICE212|A,ICE213|A,ICE216|A,ICE49|A,ICE72|A,ICE97|A,Istisu-1|A,Leo-1|A,Lerik1-3|A,Ped-0|A,TueWa1-2|A,Vash-1|A,WalhaesB4|A
AT1G32360	11673853-11674113	11674041	A	SNP_EI	Mer-6|G
AT1G32360	11673853-11674113	11674062	A	SNP_EI	HKT2.4|T,ICE111|T,ICE216|T
AT1G32360	11673853-11674113	11674080	G	SNP_EI	Agu-1|A,ICE50|A,ICE97|A,ICE98|A,Koch-1|A,Leo-1|A,TueV13|A,TueWa1-2|A,Vie-0|A,WalhaesB4|A
AT1G32360	11673853-11674113	11674086	G	SNP_EI	Agu-1|T,ICE50|T,ICE97|T,ICE98|T,Koch-1|T,Leo-1|T,Ped-0|T,TueV13|T,TueWa1-2|T,Vie-0|T,WalhaesB4|T
AT1G32360	11673853-11674113	11674122	C	SNP_EI	Agu-1|T,ICE50|T,ICE97|T,ICE98|T,Koch-1|T,Leo-1|T,Ped-0|T,TueV13|T,TueWa1-2|T,Vie-0|T,WalhaesB4|T
AT1G32640	11799339-11800740	11799417	G	SNP_EI	Vash-1|A
AT1G32640	11799339-11800740	11799450	A	SNP_EI	Vash-1|G
AT1G32640	11799339-11800740	11799459	C	SNP_EI	Vash-1|T
AT1G32640	11799339-11800740	11799513	T	SNP_EI	Vash-1|A
AT1G32640	11799339-11800740	11799515	T	SNP_EI	Vash-1|G
AT1G32640	11799339-11800740	11799516	T	SNP_EI	Vash-1|C
AT1G32640	11799339-11800740	11799552	G	SNP_EI	Vash-1|T
AT1G32640	11799339-11800740	11799588	C	SNP_EI	Vash-1|T
AT1G32640	11799339-11800740	11799669	T	SNP_EI	Xan-1|A
AT1G32640	11799339-11800740	11799675	G	SNP_EI	Nie1-2|A
AT1G32640	11799339-11800740	11799702	A	SNP_EI	ICE49|C
AT1G32640	11799339-11800740	11799711	C	SNP_EI	ICE50|T,Vash-1|T
AT1G32640	11799339-11800740	11799714	A	SNP_EI	Vash-1|T
AT1G32640	11799339-11800740	11799716	C	SNP_EI	Vash-1|T
AT1G32640	11799339-11800740	11799720	C	SNP_EI	Vash-1|A
AT1G32640	11799339-11800740	11799724	C	SNP_EI	Vash-1|T
AT1G32640	11799339-11800740	11799741	G	SNP_EI	Ey15-2|C,ICE169|C,ICE173|C,ICE181|C,ICE50|C,ICE93|C
AT1G32640	11799339-11800740	11799750	T	SNP_EI	Star-8|C,TueSB30-3|C
AT1G32640	11799339-11800740	11799755	C	SNP_EI	Qui-0|T
AT1G32640	11799339-11800740	11799768	T	SNP_EI	Vash-1|C
AT1G32640	11799339-11800740	11799858	C	SNP_EI	Vash-1|T
AT1G32640	11799339-11800740	11799861	A	SNP_EI	Vash-1|G
AT1G32640	11799339-11800740	11799876	G	SNP_EI	Star-8|T,TueSB30-3|T
AT1G32640	11799339-11800740	11799883	G	SNP_EI	TueV13|A
AT1G32640	11799339-11800740	11799889	T	SNP_EI	Vash-1|C
AT1G32640	11799339-11800740	11799987	A	SNP_EI	Vash-1|T
AT1G32640	11799339-11800740	11799999	A	SNP_EI	Vash-1|G
AT1G32640	11799339-11800740	11800008	G	SNP_EI	Vash-1|A
AT1G32640	11799339-11800740	11800034	C	SNP_EI	ICE1|T
AT1G32640	11799339-11800740	11800086	G	SNP_EI	Leo-1|A
AT1G32640	11799339-11800740	11800185	G	SNP_EI	Vash-1|A
AT1G32640	11799339-11800740	11800204	G	SNP_EI	Ey15-2|A,ICE169|A,ICE173|A,ICE181|A,ICE50|A,ICE93|A
AT1G32640	11799339-11800740	11800218	G	SNP_EI	Vash-1|A
AT1G32640	11799339-11800740	11800239	C	SNP_EI	ICE98|G
AT1G32640	11799339-11800740	11800273	A	SNP_EI	Del-10|C
AT1G32640	11799339-11800740	11800308	G	SNP_EI	Vash-1|A
AT1G32640	11799339-11800740	11800320	T	SNP_EI	Vash-1|C
AT1G32640	11799339-11800740	11800350	T	SNP_EI	Vash-1|C
AT1G32640	11799339-11800740	11800374	C	SNP_EI	Vash-1|G
AT1G32640	11799339-11800740	11800395	C	SNP_EI	Vash-1|A
AT1G32640	11799339-11800740	11800401	C	SNP_EI	Qui-0|T
AT1G32640	11799339-11800740	11800428	C	SNP_EI	ICE112|A,ICE120|A
AT1G32640	11799339-11800740	11800461	A	SNP_EI	Vash-1|C
AT1G32640	11799339-11800740	11800545	C	SNP_EI	Ey15-2|A,ICE169|A,ICE173|A
AT1G32640	11799339-11800740	11800549	C	SNP_EI	Xan-1|A
AT1G32640	11799339-11800740	11800559	G	SNP_EI	Rue3-1-31|T
AT1G32640	11799339-11800740	11800566	G	SNP_EI	Agu-1|A,Pra-6|A,TueWa1-2|A,Vie-0|A
AT1G32640	11799339-11800740	11800600	G	SNP_EI	Ler-1|A
AT1G32640	11799339-11800740	11800608	T	SNP_EI	Vash-1|G
AT1G32640	11799339-11800740	11800620	G	SNP_EI	Agu-1|A,ICE127|A,ICE130|A,ICE134|A,ICE138|A,ICE150|A,ICE152|A,ICE153|A,ICE181|T,ICE73|A,ICE93|T,Pra-6|A,Sha|A,TueWa1-2|A,Vie-0|A,Yeg-1|A,Ler-0|A
AT1G32640	11799339-11800740	11800716	C	SNP_EI	ICE50|G
AT1G33400	12107903-12108033	12107924	A	SNP_EI	Bak-2|G,Cdm-0|G,Don-0|G
AT1G33400	12107903-12108033	12107932	A	SNP_EI	Bak-2|T,Cdm-0|T,Don-0|T
AT1G33400	12107903-12108033	12107959	A	SNP_EI	Mer-6|T,Qui-0|T
AT1G33400	12107903-12108033	12107986	T	SNP_EI	Bak-2|C,Cdm-0|C,Don-0|C
AT1G33400	12107903-12108033	12108016	T	SNP_EI	ICE226|A,ICE228|A
AT1G33475	12147586-12147665	12147658	T	SPLICE_SIGNAL_SNP	Ped-0|A
AT1G33475	12147586-12147665	12147669	T	SNP_EI	Agu-1|C,Bak-2|C,Cdm-0|C,Don-0|C,ICE107|C,ICE111|C,ICE181|C,ICE226|C,ICE228|C,ICE49|C,ICE50|C,ICE97|C,Istisu-1|C,Ped-0|C,Pra-6|C,Sha|C
AT1G33475	12147721-12148028	12147709	A	SNP_EI	Ler-1|C
AT1G33475	12147721-12148028	12147729	A	SPLICE_SIGNAL_SNP	Agu-1|C,Bak-2|C,Bak-7|C,Cdm-0|C,Del-10|C,Dog-4|C,Don-0|C,Ey15-2|C,Fei-0|C,HKT2.4|C,ICE102|C,ICE104|C,ICE106|C,ICE107|C,ICE111|C,ICE112|C,ICE119|C,ICE120|C,ICE127|C,ICE130|C,ICE134|C,ICE138|C,ICE150|C,ICE152|C,ICE153|C,ICE163|C,ICE169|C,ICE173|C,ICE181|C,ICE1|C,ICE212|C,ICE213|C,ICE216|C,ICE21|C,ICE226|C,ICE228|C,ICE29|C,ICE33|C,ICE36|C,ICE49|C,ICE50|C,ICE60|C,ICE61|C,ICE63|C,ICE70|C,ICE71|C,ICE72…
AT1G33475	12147721-12148028	12147744	A	SNP_EI	Ey15-2|G,HKT2.4|G,ICE106|G,ICE112|G,ICE119|G,ICE120|G,ICE163|G,ICE21|G,ICE33|G,ICE79|G,ICE93|G,Kastel-1|G,Lag2.2|G,Lerik1-3|G,Mer-6|G,Qui-0|G,Tuescha9|G,Vash-1|G,Vie-0|G,Xan-1|G
AT1G33475	12147721-12148028	12147764	C	SNP_EI	ICE33|T
AT1G33475	12147721-12148028	12147767	C	SNP_EI	Ped-0|G
AT1G33475	12147721-12148028	12147908	C	SNP_EI	Bak-2|T,Cdm-0|T,Don-0|T,ICE107|T,ICE181|T,ICE226|T,ICE228|T,ICE49|T,ICE50|T,ICE97|T,Ped-0|T,Sha|T
AT1G33475	12147721-12148028	12147909	T	SNP_EI	Bak-2|C,Cdm-0|C,Don-0|C,ICE107|C,ICE181|C,ICE226|C,ICE228|C,ICE49|C,ICE50|C,ICE97|C,Ped-0|C,Sha|C
AT1G33475	12147721-12148028	12147930	T	SNP_EI	Bak-2|C,Cdm-0|C,Don-0|C,ICE107|C,ICE181|C,ICE226|C,ICE228|C,ICE49|C,ICE50|C,ICE97|C,Ped-0|C,Sha|C
AT1G33475	12147721-12148028	12148001	T	SNP_EI	Bak-2|C,Cdm-0|C,Don-0|C,ICE107|C,ICE181|C,ICE226|C,ICE228|C,ICE49|C,ICE50|C,ICE97|C,Ped-0|C,Sha|C
AT1G34160	12441574-12441681	12441564	C	SNP_EI	ICE71|A,ICE75|A
AT1G34160	12441574-12441681	12441569	T	SNP_EI	ICE71|C,ICE75|C
AT1G34160	12441574-12441681	12441573	C	SPLICE_SIGNAL_SNP	ICE71|A,ICE75|A
AT1G34160	12441574-12441681	12441575	G	BP_SNP	ICE71|T,ICE75|T
AT1G34160	12441574-12441681	12441576	T	BP_SNP	ICE71|C,ICE75|C
AT1G34160	12441574-12441681	12441582	C	BP_SNP	Dog-4|T,ICE107|T,ICE97|T
AT1G34160	12441574-12441681	12441650	T	SNP_EI	ICE71|C,ICE75|C
AT1G34160	12441574-12441681	12441686	T	SNP_EI	ICE127|G,ICE134|G,ICE60|G,ICE71|G,ICE75|G,Sha|G
AT1G34160	12441574-12441681	12441692	A	SNP_EI	ICE1|G
AT1G34160	12441574-12441681	12441695	G	SNP_EI	Del-10|T,Istisu-1|T,Xan-1|T
AT1G34200	12456723-12456805	12456724	A	SPLICE_SITE_SNP	Ler-1|T
AT1G34200	12456723-12456805	12456732	A	SPLICE_SIGNAL_SNP	Ler-1|T
AT1G34200	12456723-12456805	12456737	T	SNP_EI	Ler-1|C
AT1G34200	12456723-12456805	12456746	A	SNP_EI	Agu-1|T,Bak-2|T,Bak-7|T,Cdm-0|T,Del-10|T,Don-0|T,Ey15-2|T,Fei-0|T,HKT2.4|T,ICE102|T,ICE104|T,ICE106|T,ICE107|T,ICE111|T,ICE112|T,ICE119|T,ICE120|T,ICE130|T,ICE138|T,ICE150|T,ICE152|T,ICE153|T,ICE163|T,ICE169|T,ICE173|T,ICE181|T,ICE212|T,ICE213|T,ICE216|T,ICE21|T,ICE226|T,ICE228|T,ICE29|T,ICE36|T,ICE49|T,ICE50|T,ICE61|T,ICE63|T,ICE70|T,ICE71|T,ICE72|T,ICE73|T,ICE75|T,ICE79|T,ICE7|T,ICE91|T,ICE92|T…
AT1G34200	12456723-12456805	12456754	A	SNP_EI	Agu-1|T,Bak-2|T,Bak-7|T,Cdm-0|T,Del-10|T,Don-0|T,Ey15-2|T,Fei-0|T,HKT2.4|T,ICE102|T,ICE104|T,ICE106|T,ICE107|T,ICE111|T,ICE112|T,ICE119|T,ICE120|T,ICE130|T,ICE138|T,ICE150|T,ICE152|T,ICE153|T,ICE163|T,ICE169|T,ICE173|T,ICE181|T,ICE212|T,ICE213|T,ICE21|T,ICE226|T,ICE228|T,ICE29|T,ICE36|T,ICE49|T,ICE50|T,ICE61|T,ICE63|T,ICE70|T,ICE71|T,ICE72|T,ICE73|T,ICE75|T,ICE79|T,ICE7|T,ICE91|T,ICE92|T,ICE93|T,…
AT1G34200	12456723-12456805	12456759	T	BP_SNP	Agu-1|C,Bak-2|C,Bak-7|C,Cdm-0|C,Del-10|C,Don-0|C,Ey15-2|C,Fei-0|C,HKT2.4|C,ICE102|C,ICE104|C,ICE106|C,ICE107|C,ICE111|C,ICE112|C,ICE119|C,ICE120|C,ICE130|C,ICE138|C,ICE150|C,ICE152|C,ICE153|C,ICE163|C,ICE169|C,ICE173|C,ICE181|C,ICE212|C,ICE213|C,ICE21|C,ICE226|C,ICE228|C,ICE29|C,ICE36|C,ICE49|C,ICE50|C,ICE61|C,ICE63|C,ICE70|C,ICE71|C,ICE72|C,ICE73|C,ICE75|C,ICE79|C,ICE7|C,ICE91|C,ICE92|C,ICE93|C,…
AT1G34200	12456723-12456805	12456763	A	BP_SNP	Ler-1|G
AT1G34200	12456723-12456805	12456768	G	SNP_EI	Agu-1|A,Bak-2|A,Bak-7|A,Cdm-0|A,Del-10|A,Don-0|A,Ey15-2|A,Fei-0|A,HKT2.4|A,ICE102|A,ICE104|A,ICE106|A,ICE107|A,ICE111|A,ICE112|A,ICE119|A,ICE120|A,ICE130|A,ICE138|A,ICE150|A,ICE152|A,ICE153|A,ICE163|A,ICE169|A,ICE173|A,ICE181|A,ICE212|A,ICE213|A,ICE21|A,ICE226|A,ICE228|A,ICE29|A,ICE36|A,ICE49|A,ICE50|A,ICE61|A,ICE63|A,ICE70|A,ICE71|A,ICE72|A,ICE73|A,ICE75|A,ICE79|A,ICE7|A,ICE91|A,ICE92|A,ICE93|A,…
AT1G34200	12456723-12456805	12456785	A	SNP_EI	Agu-1|G,Bak-2|G,Bak-7|G,Cdm-0|G,Del-10|G,Don-0|G,Ey15-2|G,Fei-0|G,HKT2.4|G,ICE102|G,ICE104|G,ICE106|G,ICE107|G,ICE111|G,ICE112|G,ICE119|G,ICE120|G,ICE130|G,ICE138|G,ICE150|G,ICE152|G,ICE153|G,ICE163|G,ICE169|G,ICE173|G,ICE181|G,ICE212|G,ICE213|G,ICE216|G,ICE21|G,ICE226|G,ICE228|G,ICE29|G,ICE36|G,ICE49|G,ICE50|G,ICE61|G,ICE63|G,ICE70|G,ICE71|G,ICE72|G,ICE73|G,ICE75|G,ICE79|G,ICE7|G,ICE91|G,ICE92|G…
AT1G34200	12456723-12456805	12456787	C	SNP_EI	Ler-1|T
AT1G34200	12456723-12456805	12456809	C	SNP_EI	Agu-1|T,Bak-2|T,Bak-7|T,Cdm-0|T,Del-10|T,Don-0|T,Ey15-2|T,Fei-0|T,HKT2.4|T,ICE102|T,ICE104|T,ICE106|T,ICE107|T,ICE111|T,ICE112|T,ICE119|T,ICE120|T,ICE130|T,ICE138|T,ICE150|T,ICE152|T,ICE153|T,ICE163|T,ICE169|T,ICE173|T,ICE181|T,ICE212|T,ICE213|T,ICE216|T,ICE21|T,ICE226|T,ICE228|T,ICE29|T,ICE36|T,ICE49|T,ICE50|T,ICE61|T,ICE63|T,ICE70|T,ICE71|T,ICE72|T,ICE73|T,ICE75|T,ICE79|T,ICE7|T,ICE91|T,ICE92|T…
AT1G34200	12456723-12456805	12456810	A	SNP_EI	Ler-1|G
AT1G34200	12456723-12456805	12456811	T	SNP_EI	Ler-1|C
AT1G34200	12456723-12456805	12456812	G	SNP_EI	Ler-1|T
AT1G34300	12503912-12504361	12503909	G	SNP_EI	Sha|A
AT1G34300	12503912-12504361	12503925	G	SNP_EI	Dog-4|A
AT1G34300	12503912-12504361	12503932	T	SNP_EI	Dog-4|A
AT1G34300	12503912-12504361	12503935	T	SNP_EI	Dog-4|A,ICE107|G,Lag2.2|G
AT1G34300	12503912-12504361	12503954	A	SNP_EI	ICE120|C
AT1G34300	12503912-12504361	12503985	C	SNP_EI	Bak-2|G,Bak-7|G,Cdm-0|G,Del-10|G,Dog-4|G,Don-0|G,Fei-0|G,ICE102|G,ICE104|G,ICE106|G,ICE107|G,ICE111|G,ICE112|G,ICE119|G,ICE120|G,ICE127|G,ICE130|G,ICE134|G,ICE138|G,ICE150|G,ICE152|G,ICE153|G,ICE163|G,ICE169|G,ICE173|G,ICE181|G,ICE1|G,ICE212|G,ICE213|G,ICE216|G,ICE226|G,ICE228|G,ICE29|G,ICE33|G,ICE36|G,ICE50|G,ICE60|G,ICE61|G,ICE63|G,ICE70|G,ICE71|G,ICE72|G,ICE73|G,ICE75|G,ICE79|G,ICE91|G,ICE92|G…
AT1G34300	12503912-12504361	12504085	C	SNP_EI	Pra-6|T
AT1G34300	12503912-12504361	12504097	T	SNP_EI	Cdm-0|A,Don-0|A,Ped-0|A
AT1G34300	12503912-12504361	12504121	T	SNP_EI	Bak-2|C,Bak-7|C,Cdm-0|C,Del-10|C,Dog-4|C,Don-0|C,Fei-0|C,ICE102|C,ICE104|C,ICE106|C,ICE107|C,ICE111|C,ICE112|C,ICE119|C,ICE120|C,ICE127|C,ICE130|C,ICE134|C,ICE138|C,ICE150|C,ICE152|C,ICE153|C,ICE163|C,ICE169|C,ICE173|C,ICE181|C,ICE1|C,ICE212|C,ICE213|C,ICE216|C,ICE226|C,ICE228|C,ICE29|C,ICE33|C,ICE36|C,ICE50|C,ICE60|C,ICE61|C,ICE63|C,ICE70|C,ICE71|C,ICE72|C,ICE73|C,ICE75|C,ICE79|C,ICE91|C,ICE92|C…
AT1G34300	12503912-12504361	12504170	G	SNP_EI	Dog-4|A
AT1G34300	12503912-12504361	12504196	T	SNP_EI	Bak-2|C,Bak-7|C,Cdm-0|C,Del-10|C,Dog-4|C,Don-0|C,Fei-0|C,ICE102|C,ICE104|C,ICE106|C,ICE107|C,ICE111|C,ICE112|C,ICE119|C,ICE120|C,ICE127|C,ICE130|C,ICE134|C,ICE138|C,ICE150|C,ICE152|C,ICE153|C,ICE163|C,ICE169|C,ICE173|C,ICE181|C,ICE1|C,ICE212|C,ICE213|C,ICE216|C,ICE226|C,ICE228|C,ICE29|C,ICE33|C,ICE36|C,ICE50|C,ICE60|C,ICE61|C,ICE63|C,ICE70|C,ICE71|C,ICE72|C,ICE73|C,ICE75|C,ICE79|C,ICE91|C,ICE92|C…
AT1G34300	12503912-12504361	12504250	G	SNP_EI	Bak-2|A,Bak-7|A,Del-10|A,Fei-0|A,ICE102|A,ICE104|A,ICE106|A,ICE111|A,ICE112|A,ICE119|A,ICE120|A,ICE127|A,ICE130|A,ICE134|A,ICE138|A,ICE150|A,ICE152|A,ICE153|A,ICE163|A,ICE169|A,ICE173|A,ICE181|A,ICE1|A,ICE212|A,ICE213|A,ICE216|A,ICE226|A,ICE228|A,ICE29|A,ICE33|A,ICE36|A,ICE50|A,ICE60|A,ICE61|A,ICE63|A,ICE70|A,ICE71|A,ICE72|A,ICE73|A,ICE75|A,ICE79|A,ICE91|A,ICE92|A,ICE93|A,Istisu-1|A,Koch-1|A,Leo-…
AT1G34300	12503912-12504361	12504325	G	SNP_EI	ICE169|C,ICE173|C
AT1G35670	13205813-13205943	13205809	T	SNP_EI	ICE102|C,ICE104|C,ICE106|C,ICE127|C,ICE130|C,ICE134|C,ICE138|C,ICE1|C,ICE60|C,ICE61|C,ICE63|C,ICE70|C,ICE71|C,ICE72|C,ICE73|C,ICE75|C,Sha|C
AT1G35670	13205813-13205943	13205827	G	SNP_EI	Lag2.2|A,Lerik1-3|A
AT1G35670	13205813-13205943	13205839	C	SNP_EI	Agu-1|G,Cdm-0|G,Don-0|G,ICE106|G,ICE111|G,ICE119|G,ICE127|G,ICE130|G,ICE134|G,ICE138|G,ICE216|G,ICE33|G,ICE36|G,ICE49|G,ICE60|G,ICE61|G,ICE63|G,ICE70|G,ICE71|G,ICE72|G,ICE73|G,ICE75|G,ICE92|G,ICE97|G,Kastel-1|G,Lag2.2|G,Leo-1|G,Lerik1-3|G,Mer-6|G,Ped-0|G,Pra-6|G,Qui-0|G,Sha|G,Star-8|G,Tuescha9|G,WalhaesB4|G
AT1G35670	13205813-13205943	13205863	T	SNP_EI	Cdm-0|G,Star-8|G
AT1G35670	13205813-13205943	13205923	C	SNP_EI	ICE106|T,ICE127|T,ICE130|T,ICE134|T,ICE138|T,ICE60|T,ICE61|T,ICE63|T,ICE70|T,ICE71|T,ICE72|T,ICE73|T,ICE75|T,Sha|T
AT1G35670	13205813-13205943	13205942	G	SPLICE_SITE_SNP	Ped-0|A
AT1G35710	13223082-13223743	13223081	A	SPLICE_SIGNAL_SNP	Agu-1|G,Bak-2|G,Bak-7|G,Dog-4|G,Don-0|G,Ey15-2|G,Fei-0|G,HKT2.4|G,ICE106|G,ICE107|G,ICE111|G,ICE112|G,ICE119|G,ICE120|G,ICE150|G,ICE152|G,ICE153|G,ICE163|G,ICE169|G,ICE173|G,ICE181|G,ICE1|G,ICE212|G,ICE213|G,ICE216|G,ICE226|G,ICE228|G,ICE33|G,ICE36|G,ICE49|G,ICE50|G,ICE60|G,ICE79|G,ICE91|G,ICE92|G,ICE93|G,ICE97|G,ICE98|G,Istisu-1|G,Koch-1|G,Lag2.2|G,Leo-1|G,Lerik1-3|G,Nemrut-1|G,Mer-6|G,Nie1-2|G,…
AT1G35710	13223082-13223743	13223091	C	SPLICE_SIGNAL_SNP	Bak-2|A,Bak-7|A,Cdm-0|A,Dog-4|A,Ey15-2|A,HKT2.4|A,ICE102|A,ICE104|A,ICE106|A,ICE107|A,ICE112|A,ICE120|A,ICE127|A,ICE130|A,ICE134|A,ICE138|A,ICE1|A,ICE212|A,ICE213|A,ICE49|A,ICE50|A,ICE60|A,ICE61|A,ICE63|A,ICE70|A,ICE71|A,ICE72|A,ICE73|A,ICE75|A,ICE79|A,ICE92|A,ICE93|A,ICE98|A,Lag2.2|A,Lerik1-3|A,Nemrut-1|A,Nie1-2|A,Rue3-1-31|A,Sha|A,TueV13|A,Ler-0|A
AT1G35710	13223082-13223743	13223092	C	SPLICE_SIGNAL_SNP	Bak-2|A,Bak-7|A,Cdm-0|A,Dog-4|A,Ey15-2|A,HKT2.4|A,ICE102|A,ICE104|A,ICE106|A,ICE107|A,ICE112|A,ICE120|A,ICE127|A,ICE130|A,ICE134|A,ICE138|A,ICE1|A,ICE212|A,ICE213|A,ICE49|A,ICE50|A,ICE60|A,ICE61|A,ICE63|A,ICE70|A,ICE71|A,ICE72|A,ICE73|A,ICE75|A,ICE79|A,ICE92|A,ICE93|A,ICE98|A,Lerik1-3|A,Nemrut-1|A,Nie1-2|A,Rue3-1-31|A,Sha|A,TueV13|A,Ler-0|A
AT1G35710	13223082-13223743	13223095	C	SNP_EI	Ey15-2|A,HKT2.4|A,ICE107|A,ICE120|A,ICE1|A,ICE212|A,ICE213|A,ICE50|A,ICE98|A,Lerik1-3|A,Nemrut-1|A,Rue3-1-31|A,TueV13|A,Ler-0|A
AT1G35710	13223082-13223743	13223096	C	SNP_EI	Ler-1|G
AT1G35710	13223082-13223743	13223099	T	SNP_EI	Bak-2|G,Cdm-0|G,Dog-4|G,ICE102|G,ICE104|G,ICE112|G,ICE130|G,ICE134|G,ICE49|G,ICE61|G,ICE63|G,ICE70|G,ICE71|G,ICE72|G,ICE75|G,ICE79|G,ICE93|G,Sha|G
AT1G35710	13223082-13223743	13223102	C	SNP_EI	Bak-2|T,Cdm-0|T,Dog-4|T,ICE102|T,ICE104|T,ICE127|T,ICE130|T,ICE134|T,ICE49|T,ICE61|T,ICE63|T,ICE70|T,ICE72|T,ICE73|T,ICE75|T,ICE93|T,Sha|T,Ler-1|G
AT1G35710	13223082-13223743	13223107	G	SNP_EI	Agu-1|C,Fei-0|C,ICE33|C,Leo-1|C,Pra-6|C,TueWa1-2|C
AT1G35710	13223082-13223743	13223113	T	SNP_EI	Agu-1|A,Bak-7|A,Cdm-0|A,Dog-4|A,Ey15-2|A,Fei-0|A,HKT2.4|A,ICE102|A,ICE106|A,ICE107|A,ICE112|A,ICE120|A,ICE130|A,ICE134|A,ICE138|A,ICE1|A,ICE212|A,ICE213|A,ICE33|A,ICE49|A,ICE50|A,ICE60|A,ICE63|A,ICE70|A,ICE71|A,ICE72|A,ICE73|A,ICE75|A,ICE79|A,ICE92|A,ICE93|A,ICE98|A,Lag2.2|A,Leo-1|A,Lerik1-3|A,Nemrut-1|A,Nie1-2|A,Pra-6|A,Rue3-1-31|A,Sha|A,TueV13|A,TueWa1-2|A,Ler-0|A
AT1G35710	13223082-13223743	13223114	A	SNP_EI	Bak-7|T,Dog-4|T,Ey15-2|T,HKT2.4|T,ICE102|T,ICE106|T,ICE107|T,ICE112|T,ICE120|T,ICE130|T,ICE134|T,ICE138|T,ICE1|T,ICE212|T,ICE213|T,ICE49|T,ICE50|T,ICE60|T,ICE70|T,ICE71|T,ICE72|T,ICE73|T,ICE75|T,ICE79|T,ICE93|T,ICE98|T,Lag2.2|T,Lerik1-3|T,Nemrut-1|T,Nie1-2|T,Rue3-1-31|T,Sha|T,Ler-0|T
AT1G35710	13223082-13223743	13223115	G	SNP_EI	Ler-1|A
AT1G35710	13223082-13223743	13223116	C	SNP_EI	Agu-1|T,Bak-7|T,Cdm-0|T,Dog-4|T,Ey15-2|T,Fei-0|T,HKT2.4|T,ICE106|T,ICE107|T,ICE112|T,ICE120|T,ICE127|T,ICE130|T,ICE134|T,ICE138|T,ICE163|T,ICE1|T,ICE212|T,ICE213|T,ICE33|T,ICE49|T,ICE50|T,ICE60|T,ICE61|T,ICE70|T,ICE71|T,ICE72|T,ICE73|T,ICE75|T,ICE79|T,ICE92|T,ICE93|T,ICE98|T,Lag2.2|T,Leo-1|T,Lerik1-3|T,Nemrut-1|T,Nie1-2|T,Pra-6|T,Rue3-1-31|T,Sha|T,TueV13|T,TueWa1-2|T,Ler-0|T
AT1G35710	13223082-13223743	13223117	G	SNP_EI	ICE169|C,ICE173|C,ICE36|C,ICE97|C,Koch-1|C,Qui-0|C,WalhaesB4|C
AT1G35710	13223082-13223743	13223118	C	SNP_EI	ICE150|T,ICE152|T,ICE153|T,ICE163|T,ICE169|T,ICE173|T,ICE36|T,ICE97|T,Istisu-1|T,Koch-1|T,Mer-6|T,Qui-0|T,Star-8|T,Vash-1|T,WalhaesB4|T,Xan-1|T
AT1G35710	13223082-13223743	13223123	G	SNP_EI	ICE150|A,ICE152|A,ICE153|A,ICE163|A,ICE169|A,ICE173|A,ICE36|A,ICE97|A,Istisu-1|A,Koch-1|A,Mer-6|A,Qui-0|A,Star-8|A,Vash-1|A,WalhaesB4|A,Xan-1|A,Ler-1|T
AT1G35710	13223082-13223743	13223124	A	SNP_EI	Agu-1|T,Bak-2|T,Bak-7|T,Cdm-0|T,Dog-4|T,Ey15-2|T,Fei-0|T,HKT2.4|T,ICE102|T,ICE104|T,ICE106|T,ICE107|T,ICE112|T,ICE120|T,ICE127|T,ICE130|T,ICE134|T,ICE138|T,ICE1|T,ICE212|T,ICE213|T,ICE33|T,ICE49|T,ICE50|T,ICE60|T,ICE61|T,ICE63|T,ICE70|T,ICE71|T,ICE72|T,ICE73|T,ICE75|T,ICE79|T,ICE92|T,ICE93|T,ICE98|T,Lag2.2|T,Leo-1|T,Lerik1-3|T,Nemrut-1|T,Nie1-2|T,Pra-6|T,Rue3-1-31|T,Sha|T,TueV13|T,TueWa1-2|T,Ler-…
AT1G35710	13223082-13223743	13223126	G	SNP_EI	Ler-1|A
AT1G35710	13223082-13223743	13223129	C	SNP_EI	ICE216|T,ICE91|T
AT1G35710	13223082-13223743	13223130	A	SNP_EI	Ler-1|G
AT1G35710	13223082-13223743	13223132	C	SNP_EI	Ler-1|G
AT1G35710	13223082-13223743	13223148	C	SNP_EI	Bak-2|T,Cdm-0|T,Dog-4|T,ICE102|T,ICE104|T,ICE106|T,ICE112|T,ICE127|T,ICE130|T,ICE134|T,ICE138|T,ICE163|T,ICE49|T,ICE60|T,ICE61|T,ICE63|T,ICE70|T,ICE71|T,ICE72|T,ICE73|T,ICE75|T,ICE79|T,ICE92|T,ICE93|T,Nie1-2|T,Sha|T
AT1G35710	13223082-13223743	13223175	A	SNP_EI	Agu-1|G,Bak-2|G,Bak-7|G,Cdm-0|G,Dog-4|G,Ey15-2|G,Fei-0|G,HKT2.4|G,ICE102|G,ICE104|G,ICE106|G,ICE107|G,ICE112|G,ICE120|G,ICE127|G,ICE130|G,ICE134|G,ICE138|G,ICE1|G,ICE212|G,ICE213|G,ICE216|G,ICE33|G,ICE49|G,ICE50|G,ICE60|G,ICE61|G,ICE63|G,ICE70|G,ICE71|G,ICE72|G,ICE73|G,ICE75|G,ICE79|G,ICE91|G,ICE92|G,ICE93|G,ICE98|G,Lag2.2|G,Leo-1|G,Lerik1-3|G,Nemrut-1|G,Nie1-2|G,Pra-6|G,Rue3-1-31|G,Sha|G,TueV13|…
AT1G35710	13223082-13223743	13223176	C	SNP_EI	Cdm-0|T,ICE102|T,ICE104|T,ICE127|T,ICE130|T,ICE134|T,ICE138|T,ICE61|T,ICE63|T,ICE70|T,ICE71|T,ICE72|T,ICE73|T,ICE75|T,Sha|T
AT1G35710	13223082-13223743	13223180	T	SNP_EI	Ler-1|C
AT1G35710	13223082-13223743	13223184	A	SNP_EI	Ler-1|T
AT1G35710	13223082-13223743	13223186	A	SNP_EI	Agu-1|T,Bak-2|T,Bak-7|T,Cdm-0|T,Dog-4|T,Ey15-2|T,Fei-0|T,HKT2.4|T,ICE102|T,ICE104|T,ICE106|T,ICE107|T,ICE112|T,ICE120|T,ICE127|T,ICE130|T,ICE134|T,ICE138|T,ICE1|T,ICE212|T,ICE213|T,ICE216|C,ICE33|T,ICE49|T,ICE50|T,ICE60|T,ICE61|T,ICE63|T,ICE70|T,ICE71|T,ICE72|T,ICE73|T,ICE75|T,ICE79|T,ICE91|C,ICE92|T,ICE93|T,ICE98|T,Lag2.2|T,Leo-1|T,Lerik1-3|T,Nemrut-1|T,Nie1-2|T,Pra-6|T,Rue3-1-31|T,Sha|T,TueV13|…
AT1G35710	13223082-13223743	13223190	A	SNP_EI	Agu-1|G,Bak-2|G,Bak-7|G,Cdm-0|G,Dog-4|G,Ey15-2|G,Fei-0|G,HKT2.4|G,ICE102|G,ICE104|G,ICE106|G,ICE107|G,ICE112|G,ICE120|G,ICE130|G,ICE134|G,ICE138|G,ICE1|G,ICE212|G,ICE213|G,ICE33|G,ICE49|G,ICE50|G,ICE60|G,ICE61|G,ICE63|G,ICE70|G,ICE71|G,ICE72|G,ICE75|G,ICE79|G,ICE92|G,ICE93|G,ICE98|G,Lag2.2|G,Leo-1|G,Lerik1-3|G,Nemrut-1|G,Nie1-2|G,Pra-6|G,Rue3-1-31|G,Sha|G,TueV13|G,TueWa1-2|G,Ler-0|G
AT1G35710	13223082-13223743	13223191	C	SNP_EI	ICE216|G,ICE91|G
AT1G35710	13223082-13223743	13223198	T	SNP_EI	Agu-1|A,Bak-2|A,Bak-7|A,Cdm-0|A,Dog-4|A,Ey15-2|A,Fei-0|A,HKT2.4|A,ICE102|A,ICE104|A,ICE106|A,ICE107|A,ICE112|A,ICE120|A,ICE130|A,ICE134|A,ICE138|A,ICE163|A,ICE1|A,ICE212|A,ICE213|A,ICE33|A,ICE49|A,ICE50|A,ICE60|A,ICE61|A,ICE63|A,ICE70|A,ICE71|A,ICE72|A,ICE75|A,ICE79|A,ICE92|A,ICE93|A,ICE98|A,Lag2.2|A,Leo-1|A,Lerik1-3|A,Nemrut-1|A,Nie1-2|A,Pra-6|A,Rue3-1-31|A,Sha|A,TueV13|A,TueWa1-2|A,Ler-0|A
AT1G35710	13223082-13223743	13223199	T	SNP_EI	Ler-1|C
AT1G35710	13223082-13223743	13223202	G	SNP_EI	Ler-1|C
AT1G35710	13223082-13223743	13223204	G	SNP_EI	Ler-1|T
AT1G35710	13223082-13223743	13223207	C	SNP_EI	Ler-1|T
AT1G35710	13223082-13223743	13223209	A	SNP_EI	Agu-1|G,Bak-2|G,Bak-7|G,Cdm-0|G,Dog-4|G,Don-0|G,Ey15-2|G,Fei-0|G,HKT2.4|G,ICE102|G,ICE104|G,ICE106|G,ICE107|G,ICE111|G,ICE112|G,ICE119|G,ICE120|G,ICE130|G,ICE134|G,ICE138|G,ICE150|G,ICE152|G,ICE153|G,ICE163|G,ICE169|G,ICE173|G,ICE181|G,ICE1|G,ICE212|G,ICE213|G,ICE216|G,ICE226|G,ICE228|G,ICE33|G,ICE36|G,ICE49|G,ICE50|G,ICE60|G,ICE61|G,ICE63|G,ICE70|G,ICE71|G,ICE72|G,ICE73|G,ICE75|G,ICE79|G,ICE91|G…
AT1G35710	13223082-13223743	13223213	C	SNP_EI	Agu-1|T,Fei-0|T,ICE33|T,Leo-1|T,Pra-6|T,TueWa1-2|T
AT1G35710	13223082-13223743	13223215	T	SNP_EI	Agu-1|A,Bak-2|A,Bak-7|A,Cdm-0|A,Dog-4|A,Ey15-2|A,Fei-0|A,HKT2.4|A,ICE102|A,ICE104|A,ICE106|A,ICE107|A,ICE112|A,ICE120|A,ICE127|A,ICE130|A,ICE134|A,ICE138|A,ICE163|A,ICE1|A,ICE212|A,ICE213|A,ICE33|A,ICE49|A,ICE50|A,ICE60|A,ICE61|A,ICE63|A,ICE70|A,ICE71|A,ICE72|A,ICE73|A,ICE75|A,ICE79|A,ICE92|A,ICE93|A,ICE98|A,Lag2.2|A,Leo-1|A,Lerik1-3|A,Nemrut-1|A,Nie1-2|A,Pra-6|A,Rue3-1-31|A,Sha|A,TueV13|A,TueWa1…
AT1G35710	13223082-13223743	13223225	C	SNP_EI	Cdm-0|T,ICE102|T,ICE104|T,ICE127|T,ICE130|T,ICE134|T,ICE138|T,ICE61|T,ICE63|T,ICE70|T,ICE71|T,ICE72|T,ICE73|T,ICE75|T,ICE79|T,Sha|T
AT1G35710	13223082-13223743	13223229	C	SNP_EI	Ler-1|T
AT1G35710	13223082-13223743	13223232	A	SNP_EI	Bak-7|C,Ey15-2|C,HKT2.4|C,ICE107|C,ICE120|C,ICE1|C,ICE212|C,ICE213|C,ICE50|C,ICE98|C,Lag2.2|C,Lerik1-3|C,Nemrut-1|C,Rue3-1-31|C,TueV13|C,Ler-0|C
AT1G35710	13223082-13223743	13223240	C	SNP_EI	Ler-1|T
AT1G35710	13223082-13223743	13223246	A	SNP_EI	Agu-1|G,Bak-2|G,Bak-7|G,Cdm-0|G,Dog-4|G,Ey15-2|G,Fei-0|G,HKT2.4|G,ICE102|G,ICE104|G,ICE106|G,ICE107|G,ICE112|G,ICE120|G,ICE127|G,ICE130|G,ICE134|G,ICE138|G,ICE163|G,ICE1|G,ICE212|G,ICE213|G,ICE216|G,ICE33|G,ICE49|G,ICE50|G,ICE60|G,ICE61|G,ICE63|G,ICE70|G,ICE71|G,ICE72|G,ICE73|G,ICE75|G,ICE79|G,ICE91|G,ICE92|G,ICE93|G,ICE98|G,Lag2.2|G,Leo-1|G,Lerik1-3|G,Nemrut-1|G,Nie1-2|G,Pra-6|G,Rue3-1-31|G,Sha|…
AT1G35710	13223082-13223743	13223251	A	SNP_EI	Lerik1-3|T
AT1G35710	13223082-13223743	13223252	G	SNP_EI	Ler-1|C
AT1G35710	13223082-13223743	13223257	G	SNP_EI	Kastel-1|A
AT1G35710	13223082-13223743	13223258	T	SNP_EI	Ler-1|C
AT1G35710	13223082-13223743	13223260	G	SNP_EI	Agu-1|A,Bak-2|A,Cdm-0|A,Dog-4|A,Fei-0|A,ICE102|A,ICE104|A,ICE106|A,ICE112|A,ICE127|A,ICE130|A,ICE134|A,ICE138|A,ICE163|A,ICE216|A,ICE49|A,ICE60|A,ICE61|A,ICE63|A,ICE70|A,ICE71|A,ICE72|A,ICE73|A,ICE75|A,ICE79|A,ICE91|A,ICE92|A,ICE93|A,Leo-1|A,Nie1-2|A,Pra-6|A,Sha|A,TueWa1-2|A
AT1G35710	13223082-13223743	13223265	C	SNP_EI	Ler-1|G
AT1G35710	13223082-13223743	13223272	A	SNP_EI	Ler-1|G
AT1G35710	13223082-13223743	13223275	C	SNP_EI	ICE216|T,ICE91|T
AT1G35710	13223082-13223743	13223282	A	SNP_EI	Agu-1|G,Bak-2|G,Bak-7|G,Cdm-0|G,Dog-4|G,Ey15-2|G,Fei-0|G,HKT2.4|G,ICE102|G,ICE104|G,ICE106|G,ICE107|G,ICE112|G,ICE119|G,ICE120|G,ICE127|G,ICE130|G,ICE134|G,ICE138|G,ICE1|G,ICE212|G,ICE213|G,ICE216|G,ICE49|G,ICE50|G,ICE60|G,ICE61|G,ICE63|G,ICE70|G,ICE71|G,ICE72|G,ICE73|G,ICE75|G,ICE79|G,ICE91|G,ICE92|G,ICE93|G,ICE98|G,Lag2.2|G,Leo-1|G,Lerik1-3|G,Nemrut-1|G,Nie1-2|G,Pra-6|G,Rue3-1-31|G,Sha|G,TueV13…
AT1G35710	13223082-13223743	13223287	G	SNP_EI	Bak-7|A,Ey15-2|A,HKT2.4|A,ICE107|A,ICE120|A,ICE1|A,ICE212|A,ICE213|A,ICE50|A,ICE98|A,Lag2.2|A,Lerik1-3|A,Nemrut-1|A,Rue3-1-31|A,TueV13|A,Ler-0|A
AT1G35710	13223082-13223743	13223295	G	SNP_EI	ICE181|T,ICE226|T,ICE228|T
AT1G35710	13223082-13223743	13223307	T	SNP_EI	Agu-1|C,Bak-2|C,Bak-7|C,Cdm-0|C,Dog-4|C,Ey15-2|C,Fei-0|C,HKT2.4|C,ICE102|C,ICE104|C,ICE106|C,ICE107|C,ICE112|C,ICE120|C,ICE127|C,ICE130|C,ICE134|C,ICE138|C,ICE163|C,ICE1|C,ICE212|C,ICE213|C,ICE216|C,ICE49|C,ICE50|C,ICE60|C,ICE61|C,ICE63|C,ICE70|C,ICE71|C,ICE72|C,ICE73|C,ICE75|C,ICE79|C,ICE91|C,ICE92|C,ICE93|C,ICE98|C,Lag2.2|C,Leo-1|C,Lerik1-3|C,Nemrut-1|C,Nie1-2|C,Pra-6|C,Rue3-1-31|C,Sha|C,TueWa1…
AT1G35710	13223082-13223743	13223309	C	SNP_EI	Ler-1|A
AT1G35710	13223082-13223743	13223315	A	SNP_EI	Bak-2|C,Cdm-0|C,Dog-4|C,ICE102|C,ICE104|C,ICE106|C,ICE112|C,ICE127|C,ICE130|C,ICE134|C,ICE138|C,ICE49|C,ICE60|C,ICE61|C,ICE63|C,ICE70|C,ICE71|C,ICE72|C,ICE73|C,ICE75|C,ICE79|C,ICE92|C,ICE93|C,Nie1-2|C,Sha|C
AT1G35710	13223082-13223743	13223318	C	SNP_EI	Don-0|A,ICE111|A,ICE119|A,Ped-0|A
AT1G35710	13223082-13223743	13223326	T	SNP_EI	Agu-1|C,Bak-2|C,Bak-7|C,Cdm-0|C,Dog-4|C,Don-0|C,Ey15-2|C,Fei-0|C,HKT2.4|C,ICE102|C,ICE104|C,ICE106|C,ICE107|C,ICE111|C,ICE112|C,ICE119|C,ICE120|C,ICE127|C,ICE130|C,ICE134|C,ICE138|C,ICE1|C,ICE212|C,ICE213|C,ICE216|C,ICE49|C,ICE50|C,ICE60|C,ICE61|C,ICE63|C,ICE70|C,ICE71|C,ICE72|C,ICE73|C,ICE75|C,ICE79|C,ICE91|C,ICE92|C,ICE93|C,ICE98|C,Lag2.2|C,Leo-1|C,Lerik1-3|C,Nemrut-1|C,Nie1-2|C,Ped-0|C,Pra-6|C…
AT1G35710	13223082-13223743	13223327	A	SNP_EI	Bak-2|C,Cdm-0|C,Dog-4|C,ICE102|C,ICE104|C,ICE106|C,ICE112|C,ICE120|C,ICE127|C,ICE130|C,ICE134|C,ICE138|C,ICE216|C,ICE49|C,ICE60|C,ICE61|C,ICE63|C,ICE70|C,ICE71|C,ICE72|C,ICE73|C,ICE75|C,ICE79|C,ICE91|C,ICE92|C,ICE93|C,ICE98|C,Lag2.2|C,Lerik1-3|C,Nie1-2|C,Sha|C
AT1G35710	13223082-13223743	13223330	C	SNP_EI	ICE150|T,ICE152|T,ICE153|T,ICE169|T,ICE173|T,ICE33|T,ICE36|T,ICE97|T,Istisu-1|T,Koch-1|T,Mer-6|T,Qui-0|T,Star-8|T,Vash-1|T,WalhaesB4|T,Xan-1|T
AT1G35710	13223082-13223743	13223333	C	SNP_EI	Bak-7|T,Ey15-2|T,HKT2.4|T,ICE107|T,ICE1|T,ICE212|T,ICE213|T,ICE50|T,Nemrut-1|T,Rue3-1-31|T,TueV13|T,Ler-0|T
AT1G35710	13223082-13223743	13223344	A	SNP_EI	Ler-1|T
AT1G35710	13223082-13223743	13223346	C	SNP_EI	Ler-1|G
AT1G35710	13223082-13223743	13223347	T	SNP_EI	Ler-1|A
AT1G35710	13223082-13223743	13223351	T	SNP_EI	Ler-1|C
AT1G35710	13223082-13223743	13223352	A	SNP_EI	Agu-1|G,Bak-2|G,Bak-7|G,Cdm-0|G,Don-0|G,Ey15-2|G,Fei-0|G,HKT2.4|G,ICE102|G,ICE104|G,ICE106|G,ICE107|G,ICE111|G,ICE112|G,ICE119|G,ICE120|G,ICE130|G,ICE134|G,ICE138|G,ICE150|G,ICE152|G,ICE153|G,ICE163|G,ICE169|G,ICE173|G,ICE1|G,ICE212|G,ICE213|G,ICE216|G,ICE33|G,ICE36|G,ICE49|G,ICE50|G,ICE60|G,ICE61|G,ICE63|G,ICE70|G,ICE71|G,ICE72|G,ICE73|G,ICE75|G,ICE79|G,ICE91|G,ICE92|G,ICE93|G,ICE97|G,ICE98|G,Is…
AT1G35710	13223082-13223743	13223353	A	SNP_EI	Agu-1|G,Bak-2|G,Bak-7|G,Cdm-0|G,Don-0|G,Ey15-2|G,Fei-0|G,HKT2.4|G,ICE102|G,ICE104|G,ICE106|G,ICE107|G,ICE111|G,ICE112|G,ICE119|G,ICE120|G,ICE130|G,ICE134|G,ICE138|G,ICE150|G,ICE152|G,ICE153|G,ICE163|G,ICE169|G,ICE173|G,ICE1|G,ICE212|G,ICE213|G,ICE216|G,ICE33|G,ICE36|G,ICE49|G,ICE50|G,ICE60|G,ICE63|G,ICE70|G,ICE71|G,ICE72|G,ICE73|G,ICE75|G,ICE79|G,ICE91|G,ICE92|G,ICE93|G,ICE97|G,ICE98|G,Istisu-1|G…
AT1G35710	13223082-13223743	13223354	C	SNP_EI	Don-0|A,ICE111|A,ICE119|A,ICE181|A,ICE226|A,ICE228|A,Ped-0|A
AT1G35710	13223082-13223743	13223360	T	SNP_EI	Ler-1|C
AT1G35710	13223082-13223743	13223363	C	SNP_EI	Bak-2|G,Cdm-0|G,ICE104|G,ICE106|G,ICE134|G,ICE138|G,ICE60|G,ICE70|G,ICE71|G,ICE73|G,ICE75|G,ICE79|G,ICE93|G,Nie1-2|G,Sha|G
AT1G35710	13223082-13223743	13223368	G	SNP_EI	Agu-1|A,Bak-2|A,Bak-7|A,Cdm-0|A,Ey15-2|A,Fei-0|A,HKT2.4|A,ICE104|A,ICE106|A,ICE107|A,ICE120|A,ICE134|A,ICE1|A,ICE212|A,ICE213|A,ICE33|A,ICE50|A,ICE70|A,ICE71|A,ICE73|A,ICE75|A,ICE91|A,ICE98|A,Lag2.2|A,Leo-1|A,Lerik1-3|A,Nemrut-1|A,Pra-6|A,Rue3-1-31|A,Sha|A,TueV13|A,TueWa1-2|A,Ler-0|A
AT1G35710	13223082-13223743	13223373	C	SNP_EI	Ler-1|A
AT1G35710	13223082-13223743	13223374	A	SNP_EI	Ler-1|C
AT1G35710	13223082-13223743	13223375	G	SNP_EI	ICE120|A,ICE98|A,Lag2.2|A,Lerik1-3|A
AT1G35710	13223082-13223743	13223378	G	SNP_EI	Ler-1|A
AT1G35710	13223082-13223743	13223384	C	SNP_EI	Ler-1|G
AT1G35710	13223082-13223743	13223386	T	SNP_EI	Agu-1|C,Bak-7|A,Cdm-0|C,Don-0|C,Ey15-2|A,Fei-0|C,HKT2.4|A,ICE102|C,ICE107|A,ICE112|C,ICE119|C,ICE120|A,ICE130|C,ICE134|C,ICE1|A,ICE212|A,ICE213|A,ICE216|A,ICE33|C,ICE49|C,ICE50|A,ICE60|C,ICE61|C,ICE75|C,ICE91|A,ICE93|C,ICE98|A,Lag2.2|A,Leo-1|C,Lerik1-3|A,Nemrut-1|A,Nie1-2|C,Ped-0|C,Pra-6|C,Rue3-1-31|A,TueV13|A,TueWa1-2|C,Ler-0|A
AT1G35710	13223082-13223743	13223390	A	SNP_EI	Agu-1|C,Bak-7|C,Cdm-0|C,Dog-4|C,Ey15-2|C,Fei-0|C,HKT2.4|C,ICE102|C,ICE104|C,ICE106|C,ICE107|C,ICE112|C,ICE120|C,ICE127|C,ICE130|C,ICE134|C,ICE1|C,ICE212|C,ICE213|C,ICE216|C,ICE33|C,ICE49|C,ICE50|C,ICE60|C,ICE61|C,ICE72|C,ICE73|C,ICE75|C,ICE79|C,ICE91|C,ICE93|C,ICE98|C,Lag2.2|C,Leo-1|C,Lerik1-3|C,Nemrut-1|C,Nie1-2|C,Pra-6|C,Rue3-1-31|C,TueV13|C,TueWa1-2|C,Ler-0|C
AT1G35710	13223082-13223743	13223403	A	SNP_EI	Bak-2|T,Cdm-0|T,Dog-4|T,Don-0|G,ICE102|T,ICE104|T,ICE106|T,ICE112|T,ICE119|G,ICE127|T,ICE130|T,ICE134|T,ICE138|T,ICE163|T,ICE49|T,ICE60|T,ICE61|T,ICE63|T,ICE70|T,ICE71|T,ICE72|T,ICE73|T,ICE75|T,ICE79|T,ICE92|T,ICE93|T,Nie1-2|T,Ped-0|G,Sha|T
AT1G35710	13223082-13223743	13223404	A	SNP_EI	Ler-1|T
AT1G35710	13223082-13223743	13223406	G	SNP_EI	Bak-2|A,Cdm-0|A,Dog-4|A,ICE102|A,ICE104|A,ICE106|A,ICE112|A,ICE127|A,ICE130|A,ICE134|A,ICE138|A,ICE49|A,ICE60|A,ICE61|A,ICE63|A,ICE70|A,ICE71|A,ICE72|A,ICE73|A,ICE75|A,ICE79|A,ICE92|A,ICE93|A,Nie1-2|A,Sha|A
AT1G35710	13223082-13223743	13223407	A	SNP_EI	ICE216|T,ICE91|T
AT1G35710	13223082-13223743	13223409	C	SNP_EI	Agu-1|T,Bak-7|T,Don-0|A,Ey15-2|T,Fei-0|T,HKT2.4|T,ICE107|T,ICE111|T,ICE119|A,ICE120|T,ICE1|T,ICE212|T,ICE213|T,ICE216|T,ICE33|T,ICE50|T,ICE91|T,ICE98|T,Lag2.2|T,Leo-1|T,Lerik1-3|T,Nemrut-1|T,Ped-0|A,Pra-6|T,Rue3-1-31|T,TueV13|T,TueWa1-2|T,Ler-0|T
AT1G35710	13223082-13223743	13223418	C	SNP_EI	Ler-1|G
AT1G35710	13223082-13223743	13223430	A	SNP_EI	Ler-1|T
AT1G35710	13223082-13223743	13223432	C	SNP_EI	ICE120|T,ICE98|T,Lag2.2|T,Lerik1-3|T
AT1G35710	13223082-13223743	13223433	A	SNP_EI	ICE120|G,ICE98|G,Lag2.2|G,Lerik1-3|G
AT1G35710	13223082-13223743	13223437	T	SNP_EI	Agu-1|A,Fei-0|A,ICE33|A,Leo-1|A,Pra-6|A,TueWa1-2|A
AT1G35710	13223082-13223743	13223449	C	SNP_EI	Ler-1|G
AT1G35710	13223082-13223743	13223459	C	SNP_EI	Ler-1|T
AT1G35710	13223082-13223743	13223463	C	SNP_EI	Cdm-0|G,ICE102|G,ICE104|G,ICE119|G,ICE127|G,ICE130|G,ICE134|G,ICE138|G,ICE61|G,ICE63|G,ICE70|G,ICE71|G,ICE72|G,ICE73|G,ICE75|G,ICE79|G,Lerik1-3|G,Sha|G
AT1G35710	13223082-13223743	13223468	G	SNP_EI	Ler-1|A
AT1G35710	13223082-13223743	13223474	C	SNP_EI	Bak-7|T,Cdm-0|T,Ey15-2|T,HKT2.4|T,ICE102|T,ICE104|T,ICE107|T,ICE111|T,ICE119|T,ICE127|T,ICE130|T,ICE134|T,ICE138|T,ICE1|T,ICE212|T,ICE213|T,ICE50|T,ICE61|T,ICE63|T,ICE70|T,ICE71|T,ICE72|T,ICE73|T,ICE75|T,ICE79|T,Lerik1-3|T,Nemrut-1|T,Rue3-1-31|T,Sha|T,TueV13|T,Ler-0|T
AT1G35710	13223082-13223743	13223480	A	SNP_EI	Bak-2|T,Dog-4|T,ICE106|T,ICE112|T,ICE163|T,ICE49|T,ICE60|T,ICE92|T,ICE93|T,Nie1-2|T
AT1G35710	13223082-13223743	13223486	T	SNP_EI	Ler-1|C
AT1G35710	13223082-13223743	13223491	T	SNP_EI	Ler-1|A
AT1G35710	13223082-13223743	13223492	T	SNP_EI	Ler-1|G
AT1G35710	13223082-13223743	13223514	C	SNP_EI	Ler-1|A
AT1G35710	13223082-13223743	13223515	C	SNP_EI	Ler-1|T
AT1G35710	13223082-13223743	13223516	C	SNP_EI	ICE216|T,ICE91|T
AT1G35710	13223082-13223743	13223523	G	SNP_EI	Ler-1|C
AT1G35710	13223082-13223743	13223539	G	SNP_EI	Bak-2|A,Bak-7|A,Cdm-0|A,Dog-4|A,Ey15-2|A,HKT2.4|A,ICE102|A,ICE104|A,ICE106|A,ICE107|A,ICE112|A,ICE120|A,ICE127|A,ICE130|A,ICE134|A,ICE138|A,ICE1|A,ICE212|A,ICE213|A,ICE216|A,ICE49|A,ICE50|A,ICE60|A,ICE61|A,ICE63|A,ICE70|A,ICE71|A,ICE72|A,ICE73|A,ICE75|A,ICE79|A,ICE91|A,ICE92|A,ICE93|A,ICE98|A,Lag2.2|A,Lerik1-3|A,Nemrut-1|A,Nie1-2|A,Rue3-1-31|A,Sha|A,TueV13|A,Ler-0|A
AT1G35710	13223082-13223743	13223540	T	SNP_EI	Ler-1|G
AT1G35710	13223082-13223743	13223543	A	SNP_EI	ICE216|G,ICE91|G
AT1G35710	13223082-13223743	13223548	C	SNP_EI	Ler-1|G
AT1G35710	13223082-13223743	13223553	A	SNP_EI	Ler-1|C
AT1G35710	13223082-13223743	13223554	T	SNP_EI	Ler-1|A
AT1G35710	13223082-13223743	13223555	T	SNP_EI	ICE106|C,ICE112|C,ICE60|C,ICE79|C,ICE92|C,ICE93|C,Lerik1-3|C,Nie1-2|C
AT1G35710	13223082-13223743	13223556	A	SNP_EI	Bak-7|G,Cdm-0|G,Ey15-2|G,HKT2.4|G,ICE102|G,ICE104|G,ICE106|G,ICE107|G,ICE112|G,ICE120|G,ICE127|G,ICE130|G,ICE134|G,ICE138|G,ICE1|G,ICE212|G,ICE213|G,ICE50|G,ICE60|G,ICE61|G,ICE63|G,ICE70|G,ICE71|G,ICE72|G,ICE75|G,ICE79|G,ICE92|G,ICE93|G,ICE98|G,Nie1-2|G,Rue3-1-31|G,Sha|G,TueV13|G,Ler-0|G
AT1G35710	13223082-13223743	13223558	A	SNP_EI	Bak-7|G,Cdm-0|G,HKT2.4|G,ICE104|G,ICE107|G,ICE120|G,ICE127|G,ICE130|G,ICE134|G,ICE138|G,ICE1|G,ICE212|G,ICE213|G,ICE50|G,ICE60|G,ICE61|G,ICE63|G,ICE70|G,ICE71|G,ICE72|G,ICE75|G,ICE93|G,ICE98|G,Rue3-1-31|G,Sha|G,TueV13|G,Ler-0|G
AT1G35710	13223082-13223743	13223561	C	SNP_EI	Cdm-0|A,ICE104|A,ICE107|A,ICE120|A,ICE130|A,ICE134|A,ICE138|A,ICE213|A,ICE50|A,ICE63|A,ICE70|A,Rue3-1-31|A,Sha|A,TueV13|A,Ler-0|A
AT1G35710	13223082-13223743	13223562	A	SNP_EI	Cdm-0|G,ICE104|G,ICE107|G,ICE120|G,ICE127|G,ICE130|G,ICE134|G,ICE138|G,ICE213|G,ICE61|G,ICE63|G,ICE70|G,ICE75|G,Rue3-1-31|G,Sha|G,Ler-0|G
AT1G35710	13223082-13223743	13223570	T	SNP_EI	Cdm-0|G,Dog-4|G,Ey15-2|G,ICE107|G,ICE112|G,ICE130|G,ICE134|G,ICE138|G,ICE212|G,ICE213|G,ICE49|G,ICE50|G,ICE60|G,ICE61|G,ICE70|G,ICE72|G,ICE73|G,ICE75|G,ICE92|G,Nemrut-1|G,Nie1-2|G,Rue3-1-31|G,Sha|G,TueV13|G,Ler-0|G
AT1G35710	13223082-13223743	13223574	C	SNP_EI	Bak-2|A,Bak-7|A,Cdm-0|A,Dog-4|A,Ey15-2|A,HKT2.4|A,ICE102|A,ICE104|A,ICE106|A,ICE107|A,ICE112|A,ICE127|A,ICE130|A,ICE134|A,ICE138|A,ICE1|A,ICE212|A,ICE213|A,ICE49|A,ICE50|A,ICE60|A,ICE61|A,ICE63|A,ICE70|A,ICE71|A,ICE72|A,ICE73|A,ICE75|A,ICE92|A,ICE93|A,ICE98|A,Lag2.2|A,Nemrut-1|A,Nie1-2|A,Rue3-1-31|A,Sha|A,TueV13|A,Ler-0|A
AT1G35710	13223082-13223743	13223576	A	SNP_EI	Bak-2|G,Bak-7|G,Cdm-0|G,Dog-4|G,Ey15-2|G,ICE102|G,ICE106|G,ICE107|G,ICE112|G,ICE127|G,ICE130|G,ICE134|G,ICE138|G,ICE1|G,ICE212|G,ICE213|G,ICE216|G,ICE49|G,ICE50|G,ICE60|G,ICE61|G,ICE63|G,ICE70|G,ICE71|G,ICE72|G,ICE73|G,ICE75|G,ICE79|G,ICE92|G,ICE93|G,ICE98|G,Lag2.2|G,Nemrut-1|G,Nie1-2|G,Rue3-1-31|G,Sha|G,TueV13|G,Ler-0|G
AT1G35710	13223082-13223743	13223585	C	SNP_EI	Bak-2|T,Bak-7|T,Cdm-0|T,Dog-4|T,Ey15-2|T,HKT2.4|T,ICE102|T,ICE104|T,ICE106|T,ICE107|T,ICE112|T,ICE127|T,ICE130|T,ICE134|T,ICE138|T,ICE163|T,ICE1|T,ICE212|T,ICE213|T,ICE216|G,ICE49|T,ICE50|T,ICE60|T,ICE61|T,ICE63|T,ICE70|T,ICE71|T,ICE72|T,ICE73|T,ICE75|T,ICE79|T,ICE91|G,ICE92|T,ICE93|T,ICE98|T,Lag2.2|T,Lerik1-3|T,Nemrut-1|T,Nie1-2|T,Rue3-1-31|T,Sha|T,TueV13|T,Ler-1|G,Ler-0|T
AT1G35710	13223082-13223743	13223586	A	SNP_EI	ICE216|T,ICE91|T
AT1G35710	13223082-13223743	13223594	T	SNP_EI	Ler-1|C
AT1G35710	13223082-13223743	13223609	G	SNP_EI	Ler-1|C
AT1G35710	13223082-13223743	13223615	T	SNP_EI	Bak-2|G,Bak-7|G,Cdm-0|G,Dog-4|G,Don-0|G,Ey15-2|G,HKT2.4|G,ICE102|G,ICE104|G,ICE106|G,ICE107|G,ICE111|G,ICE112|G,ICE119|G,ICE120|G,ICE127|G,ICE130|G,ICE134|G,ICE138|G,ICE1|G,ICE212|G,ICE213|G,ICE216|G,ICE49|G,ICE50|G,ICE60|G,ICE61|G,ICE63|G,ICE70|G,ICE71|G,ICE72|G,ICE73|G,ICE75|G,ICE79|G,ICE91|G,ICE92|G,ICE93|G,ICE98|G,Lag2.2|G,Lerik1-3|G,Nemrut-1|G,Nie1-2|G,Ped-0|G,Rue3-1-31|G,Sha|G,TueV13|G,Ler-…
AT1G35710	13223082-13223743	13223618	A	SNP_EI	Ler-1|G
AT1G35710	13223082-13223743	13223619	A	SNP_EI	Ler-1|G
AT1G35710	13223082-13223743	13223621	T	SNP_EI	Ler-1|A
AT1G35710	13223082-13223743	13223622	A	SNP_EI	Ler-1|C
AT1G35710	13223082-13223743	13223625	T	SNP_EI	Ler-1|A
AT1G35710	13223082-13223743	13223630	G	SNP_EI	Ler-1|A
AT1G35710	13223082-13223743	13223631	C	SNP_EI	Agu-1|T,Leo-1|T,Pra-6|T
AT1G35710	13223082-13223743	13223636	C	SNP_EI	Ler-1|T
AT1G35710	13223082-13223743	13223639	G	SNP_EI	Bak-2|A,Bak-7|A,Cdm-0|A,Dog-4|A,Don-0|A,Ey15-2|A,HKT2.4|A,ICE102|A,ICE104|A,ICE106|A,ICE107|A,ICE111|A,ICE112|A,ICE119|A,ICE120|A,ICE127|A,ICE130|A,ICE134|A,ICE138|A,ICE163|A,ICE1|A,ICE212|A,ICE213|A,ICE216|A,ICE49|A,ICE50|A,ICE60|A,ICE61|A,ICE63|A,ICE70|A,ICE71|A,ICE72|A,ICE73|A,ICE75|A,ICE79|A,ICE91|A,ICE92|A,ICE93|A,ICE98|A,Lag2.2|A,Lerik1-3|A,Nemrut-1|A,Nie1-2|A,Ped-0|A,Rue3-1-31|A,Sha|A,TueV…
AT1G35710	13223082-13223743	13223644	A	SNP_EI	Bak-2|G,Bak-7|G,Cdm-0|G,Dog-4|G,Don-0|G,Ey15-2|G,HKT2.4|G,ICE102|G,ICE104|G,ICE106|G,ICE107|G,ICE111|G,ICE112|G,ICE119|G,ICE120|G,ICE127|G,ICE130|G,ICE134|G,ICE138|G,ICE1|G,ICE212|G,ICE213|G,ICE49|G,ICE50|G,ICE60|G,ICE61|G,ICE63|G,ICE70|G,ICE71|G,ICE72|G,ICE73|G,ICE75|G,ICE79|G,ICE92|G,ICE93|G,ICE98|G,Lag2.2|G,Lerik1-3|G,Nemrut-1|G,Nie1-2|G,Ped-0|G,Rue3-1-31|G,Sha|G,TueV13|G,Ler-0|G
AT1G35710	13223082-13223743	13223648	A	SNP_EI	Bak-2|G,Bak-7|G,Cdm-0|G,Dog-4|G,Don-0|G,Ey15-2|G,HKT2.4|G,ICE102|G,ICE104|G,ICE106|G,ICE107|G,ICE111|G,ICE112|G,ICE119|T,ICE120|G,ICE127|G,ICE130|G,ICE134|G,ICE138|G,ICE1|G,ICE212|G,ICE213|G,ICE49|G,ICE50|G,ICE60|G,ICE61|G,ICE63|G,ICE70|G,ICE71|G,ICE72|G,ICE73|G,ICE75|G,ICE79|T,ICE92|G,ICE93|G,ICE98|G,Lag2.2|G,Lerik1-3|G,Nemrut-1|G,Nie1-2|G,Ped-0|G,Rue3-1-31|G,Sha|G,TueV13|G,Ler-0|G
AT1G35710	13223082-13223743	13223658	C	SNP_EI	Ler-1|T
AT1G35710	13223082-13223743	13223669	C	SNP_EI	Bak-2|A,Cdm-0|A,Dog-4|A,ICE102|A,ICE104|A,ICE106|A,ICE112|A,ICE127|A,ICE130|A,ICE134|A,ICE138|A,ICE163|A,ICE49|A,ICE60|A,ICE61|A,ICE63|A,ICE70|A,ICE71|A,ICE72|A,ICE73|A,ICE75|A,ICE92|A,ICE93|A,Lerik1-3|A,Nie1-2|A,Sha|A
AT1G35710	13223082-13223743	13223672	C	SNP_EI	ICE216|T,ICE91|T
AT1G35710	13223082-13223743	13223675	T	SNP_EI	Bak-7|G,Don-0|G,Ey15-2|G,HKT2.4|G,ICE107|G,ICE111|G,ICE120|G,ICE1|G,ICE212|G,ICE213|G,ICE216|G,ICE50|G,ICE91|G,ICE98|G,Lag2.2|G,Nemrut-1|G,Ped-0|G,Rue3-1-31|G,TueV13|G,Ler-0|G
AT1G35710	13223082-13223743	13223686	T	SNP_EI	ICE120|A,ICE98|A,Lag2.2|A
AT1G35710	13223082-13223743	13223690	C	SNP_EI	Bak-7|T,Don-0|T,Ey15-2|T,HKT2.4|T,ICE107|T,ICE111|T,ICE1|T,ICE212|T,ICE213|T,ICE216|T,ICE50|T,ICE91|T,Nemrut-1|T,Ped-0|T,Rue3-1-31|T,TueV13|T,Ler-0|T
AT1G35710	13223082-13223743	13223699	C	SNP_EI	Bak-7|A,Ey15-2|A,HKT2.4|A,ICE107|A,ICE1|A,ICE212|A,ICE213|A,ICE216|A,ICE50|A,ICE91|A,Nemrut-1|A,Rue3-1-31|A,TueV13|A,WalhaesB4|A,Ler-0|A
AT1G35710	13223082-13223743	13223702	T	SNP_EI	Ler-1|A
AT1G35710	13223082-13223743	13223703	C	SNP_EI	Ler-1|A
AT1G35710	13223082-13223743	13223704	T	SNP_EI	Ler-1|G
AT1G35710	13223082-13223743	13223707	G	SNP_EI	ICE120|A,ICE98|A,Lag2.2|A
AT1G35710	13223082-13223743	13223708	A	SNP_EI	Ler-1|G
AT1G35710	13223082-13223743	13223713	A	SNP_EI	Ler-1|G
AT1G35710	13223082-13223743	13223714	A	SNP_EI	Bak-2|G,Bak-7|G,Cdm-0|G,Dog-4|G,Don-0|G,Ey15-2|G,HKT2.4|G,ICE102|G,ICE104|G,ICE106|G,ICE107|G,ICE111|G,ICE112|G,ICE119|G,ICE120|G,ICE127|G,ICE130|G,ICE134|G,ICE138|G,ICE1|G,ICE212|G,ICE213|G,ICE216|G,ICE36|G,ICE49|G,ICE50|G,ICE60|G,ICE61|G,ICE63|G,ICE70|G,ICE71|G,ICE72|G,ICE73|G,ICE75|G,ICE79|G,ICE91|G,ICE92|G,ICE93|G,ICE97|G,ICE98|G,Lag2.2|G,Lerik1-3|G,Nemrut-1|G,Nie1-2|G,Ped-0|G,Qui-0|G,Rue3-1-…
AT1G35710	13223082-13223743	13223718	C	SNP_EI	ICE120|T,ICE98|T,Lag2.2|T
AT1G35710	13223082-13223743	13223719	C	SNP_EI	Ler-1|G
AT1G35710	13223082-13223743	13223720	G	SNP_EI	Don-0|C,Ped-0|C
AT1G35710	13223082-13223743	13223723	C	SNP_EI	Ler-1|A
AT1G35710	13223082-13223743	13223729	G	SNP_EI	Don-0|A,Ped-0|A
AT1G35710	13223082-13223743	13223731	T	SNP_EI	Ler-1|C
AT1G35710	13223082-13223743	13223736	G	SPLICE_SIGNAL_SNP	Lerik1-3|A
AT1G35710	13223082-13223743	13223748	T	SNP_EI	Bak-7|C,Ey15-2|C,HKT2.4|C,ICE107|C,ICE212|C,ICE213|C,Nemrut-1|C,Rue3-1-31|C,TueV13|C,Ler-0|C
AT1G35710	13223082-13223743	13223753	C	SNP_EI	Bak-7|A,Ey15-2|A,HKT2.4|A,ICE107|A,ICE1|A,ICE212|A,ICE213|A,ICE36|A,ICE50|A,Nemrut-1|A,Rue3-1-31|A,TueV13|A,Ler-0|A
AT1G35710	13223082-13223743	13223756	C	SNP_EI	Ler-1|T
AT1G43710	16487784-16487878	16487789	A	SPLICE_SIGNAL_SNP	Bak-7|G,ICE102|G,ICE111|G,ICE150|G,ICE152|G,ICE153|G,Istisu-1|G,Lag2.2|G,Xan-1|G
AT1G43710	16487784-16487878	16487798	T	SNP_EI	ICE104|C
AT1G43710	16487784-16487878	16487840	A	SNP_EI	ICE92|G
AT1G43710	16487784-16487878	16487843	A	SNP_EI	Cdm-0|G
AT1G43980	16688648-16688743	16688651	T	SPLICE_SIGNAL_SNP	Ler-1|C
AT1G43980	16688648-16688743	16688689	C	SNP_EI	Bak-7|T,ICE63|T
AT1G43980	16688648-16688743	16688705	A	SNP_EI	Kastel-1|C
AT1G43980	16688648-16688743	16688724	A	SNP_EI	Ler-1|G
AT1G43980	16688648-16688743	16688748	C	SNP_EI	Dog-4|T
AT1G43980	16688648-16688743	16688752	G	SNP_EI	Agu-1|A,Bak-2|A,Bak-7|A,Cdm-0|A,Del-10|A,Dog-4|A,Don-0|A,Ey15-2|A,Fei-0|A,HKT2.4|A,ICE102|A,ICE107|A,ICE112|A,ICE120|A,ICE127|A,ICE130|A,ICE134|A,ICE138|A,ICE150|A,ICE152|A,ICE153|A,ICE163|A,ICE169|A,ICE173|A,ICE181|A,ICE212|A,ICE213|A,ICE216|A,ICE21|A,ICE226|A,ICE228|A,ICE29|A,ICE33|A,ICE49|A,ICE50|A,ICE60|A,ICE61|A,ICE63|A,ICE70|A,ICE71|A,ICE72|A,ICE73|A,ICE75|A,ICE79|A,ICE7|A,ICE91|A,ICE92|A,I…
AT1G43980	16688648-16688743	16688753	T	SNP_EI	Agu-1|A,Cdm-0|A,Ped-0|A
AT1G44100	16765564-16765705	16765561	C	SNP_EI	Agu-1|A,Cdm-0|A,Don-0|A,ICE102|A,ICE106|A,ICE111|A,ICE91|A,ICE92|A,Ped-0|A
AT1G44100	16765564-16765705	16765579	C	SNP_EI	Agu-1|A,Cdm-0|A,Don-0|A,ICE102|A,ICE104|A,ICE106|A,ICE111|A,ICE33|A,ICE79|A,ICE91|A,ICE92|A,ICE93|A,ICE97|A,Istisu-1|A,Ped-0|A
AT1G44100	16765564-16765705	16765598	G	SNP_EI	ICE104|C
AT1G47250	17320802-17320869	17320787	G	SNP_EI	Don-0|A
AT1G47250	17320802-17320869	17320806	A	SPLICE_SIGNAL_SNP	Agu-1|G,Bak-2|G,Bak-7|G,Del-10|G,Dog-4|G,Ey15-2|G,Fei-0|G,HKT2.4|G,ICE102|G,ICE104|G,ICE106|G,ICE111|G,ICE112|G,ICE119|G,ICE181|G,ICE1|G,ICE212|G,ICE213|G,ICE216|G,ICE226|G,ICE228|G,ICE29|G,ICE33|G,ICE36|G,ICE63|G,ICE70|G,ICE73|G,ICE75|G,ICE79|G,ICE7|G,ICE91|G,ICE93|G,Istisu-1|G,Lerik1-3|G,Nemrut-1|G,Mer-6|G,Nie1-2|G,Pra-6|G,Qui-0|G,Rue3-1-31|G,Star-8|G,TueSB30-3|G,Tuescha9|G,TueV13|G,TueWa1-2|G,…
AT1G47250	17320802-17320869	17320809	G	SPLICE_SIGNAL_SNP	Agu-1|A,Bak-2|A,Bak-7|A,Del-10|A,Dog-4|A,Ey15-2|A,Fei-0|A,HKT2.4|A,ICE102|A,ICE104|A,ICE106|A,ICE111|A,ICE112|A,ICE119|A,ICE181|A,ICE1|A,ICE212|A,ICE213|A,ICE216|A,ICE226|A,ICE228|A,ICE29|A,ICE33|A,ICE36|A,ICE63|A,ICE70|A,ICE73|A,ICE75|A,ICE79|A,ICE7|A,ICE91|A,ICE93|A,Istisu-1|A,Lerik1-3|A,Nemrut-1|A,Mer-6|A,Nie1-2|A,Pra-6|A,Qui-0|A,Rue3-1-31|A,Star-8|A,TueSB30-3|A,Tuescha9|A,TueV13|A,TueWa1-2|A,…
AT1G47250	17320802-17320869	17320820	C	SNP_EI	Yeg-1|A
AT1G47250	17320802-17320869	17320822	C	SNP_EI	Agu-1|G,Bak-2|G,Bak-7|G,Del-10|G,Dog-4|G,Ey15-2|G,Fei-0|G,HKT2.4|G,ICE102|G,ICE104|G,ICE106|G,ICE111|G,ICE112|G,ICE119|G,ICE181|G,ICE1|G,ICE212|G,ICE213|G,ICE216|G,ICE226|G,ICE228|G,ICE29|G,ICE33|G,ICE36|G,ICE63|G,ICE70|G,ICE73|G,ICE75|G,ICE79|G,ICE7|G,ICE91|G,ICE93|G,Istisu-1|G,Lerik1-3|G,Nemrut-1|G,Mer-6|G,Nie1-2|G,Pra-6|G,Qui-0|G,Rue3-1-31|G,Star-8|G,TueSB30-3|G,Tuescha9|G,TueV13|G,TueWa1-2|G,…
AT1G47250	17320802-17320869	17320825	A	SNP_EI	Agu-1|G,Bak-2|G,Bak-7|G,Del-10|G,Dog-4|G,Ey15-2|G,Fei-0|G,HKT2.4|G,ICE102|G,ICE104|G,ICE106|G,ICE111|G,ICE112|G,ICE119|G,ICE181|G,ICE1|G,ICE212|G,ICE213|G,ICE216|G,ICE226|G,ICE228|G,ICE29|G,ICE33|G,ICE36|G,ICE63|G,ICE70|G,ICE73|G,ICE75|G,ICE79|G,ICE7|G,ICE91|G,ICE93|G,Istisu-1|G,Lerik1-3|G,Nemrut-1|G,Mer-6|G,Nie1-2|G,Pra-6|G,Qui-0|G,Rue3-1-31|G,Star-8|G,TueSB30-3|G,Tuescha9|G,TueV13|G,TueWa1-2|G,…
AT1G47250	17320802-17320869	17320829	G	SNP_EI	ICE49|A
AT1G47250	17320802-17320869	17320838	G	SNP_EI	Agu-1|A,Bak-2|A,Bak-7|A,Del-10|A,Dog-4|A,Ey15-2|A,Fei-0|A,HKT2.4|A,ICE102|A,ICE104|A,ICE106|A,ICE111|A,ICE112|A,ICE119|A,ICE181|A,ICE1|A,ICE212|A,ICE213|A,ICE216|A,ICE226|A,ICE228|A,ICE29|A,ICE33|A,ICE36|A,ICE63|A,ICE70|A,ICE73|A,ICE75|A,ICE79|A,ICE7|A,ICE91|A,ICE93|A,Istisu-1|A,Lerik1-3|A,Nemrut-1|A,Mer-6|A,Nie1-2|A,Pra-6|A,Qui-0|A,Rue3-1-31|A,Star-8|A,TueSB30-3|A,Tuescha9|A,TueV13|A,TueWa1-2|A,…
AT1G47250	17320802-17320869	17320849	T	SNP_EI	ICE33|C
AT1G47250	17320802-17320869	17320854	A	SNP_EI	Agu-1|T,Bak-2|T,Bak-7|T,Del-10|T,Dog-4|T,Ey15-2|T,Fei-0|T,HKT2.4|T,ICE102|T,ICE104|T,ICE106|T,ICE111|T,ICE112|T,ICE119|T,ICE181|T,ICE1|T,ICE212|T,ICE213|T,ICE216|T,ICE226|T,ICE228|T,ICE29|T,ICE33|T,ICE36|T,ICE63|T,ICE70|T,ICE73|T,ICE75|T,ICE79|T,ICE7|T,ICE91|T,ICE93|T,Istisu-1|T,Lerik1-3|T,Nemrut-1|T,Mer-6|T,Nie1-2|T,Pra-6|T,Qui-0|T,Rue3-1-31|T,Star-8|T,TueSB30-3|T,Tuescha9|T,TueV13|T,TueWa1-2|T,…
AT1G47250	17320802-17320869	17320877	G	SNP_EI	TueV13|A,TueWa1-2|A
AT1G47250	17320802-17320869	17320882	T	SNP_EI	Agu-1|C,Bak-2|C,Bak-7|C,Del-10|C,Dog-4|C,Ey15-2|C,Fei-0|C,HKT2.4|C,ICE102|C,ICE104|C,ICE106|C,ICE111|C,ICE112|C,ICE119|C,ICE181|C,ICE1|C,ICE212|C,ICE213|C,ICE216|C,ICE226|C,ICE228|C,ICE29|C,ICE33|C,ICE36|C,ICE63|C,ICE70|C,ICE73|C,ICE75|C,ICE79|C,ICE7|C,ICE91|C,ICE93|C,Istisu-1|C,Lerik1-3|C,Nemrut-1|C,Mer-6|C,Nie1-2|C,Pra-6|C,Qui-0|C,Rue3-1-31|C,Star-8|C,TueSB30-3|C,Tuescha9|C,TueV13|C,TueWa1-2|C,…
AT1G47490	17424846-17424929	17424841	C	SNP_EI	Ler-1|T
AT1G47490	17424846-17424929	17424851	A	SPLICE_SIGNAL_SNP	Cdm-0|C,ICE50|C,Kastel-1|C,Lag2.2|C,Ped-0|C,Qui-0|C,Vie-0|C
AT1G47490	17424846-17424929	17424852	G	SPLICE_SIGNAL_SNP	Lag2.2|T,Vie-0|T
AT1G47490	17424846-17424929	17424902	G	SNP_EI	Cdm-0|A,ICE50|A,Kastel-1|A,Lag2.2|A,Ped-0|A,Qui-0|A,Vie-0|A
AT1G47490	17424846-17424929	17424914	G	SNP_EI	Vie-0|T
AT1G47490	17424846-17424929	17424935	G	SNP_EI	TueSB30-3|T
AT1G47490	17424846-17424929	17424937	C	SNP_EI	Agu-1|T
AT1G47900	17649161-17649807	17649156	G	SNP_EI	TueSB30-3|A
AT1G47900	17649161-17649807	17649168	G	SPLICE_SIGNAL_SNP	Bak-2|T,Ey15-2|T,Fei-0|T,ICE102|T,ICE104|T,ICE107|T,ICE111|T,ICE119|T,ICE120|T,ICE50|T,ICE71|T,ICE73|T,ICE79|T,ICE7|T,ICE92|T,ICE93|T,ICE97|T,ICE98|T,Istisu-1|T,Kastel-1|T,Lerik1-3|T,Pra-6|T,TueSB30-3|T,Vash-1|T
AT1G47900	17649161-17649807	17649192	C	SNP_EI	Bak-2|A,Ey15-2|A,Fei-0|A,ICE102|A,ICE104|A,ICE107|A,ICE111|A,ICE119|A,ICE120|A,ICE50|A,ICE71|A,ICE73|A,ICE79|A,ICE7|A,ICE92|A,ICE93|A,ICE97|A,ICE98|A,Istisu-1|A,Kastel-1|A,Lerik1-3|A,Pra-6|A,TueSB30-3|A,Vash-1|A
AT1G47900	17649161-17649807	17649248	A	SNP_EI	Ler-1|G
AT1G47900	17649161-17649807	17649261	T	SNP_EI	Bak-2|C,Ey15-2|C,Fei-0|C,ICE102|C,ICE104|C,ICE107|C,ICE111|C,ICE119|C,ICE120|C,ICE163|C,ICE50|C,ICE71|C,ICE79|C,ICE7|C,ICE92|C,ICE93|C,ICE97|C,ICE98|C,Istisu-1|C,Kastel-1|C,Lerik1-3|C,Pra-6|C,TueSB30-3|C,Vash-1|C
AT1G47900	17649161-17649807	17649268	A	SNP_EI	Ler-1|T
AT1G47900	17649161-17649807	17649349	T	SNP_EI	Tuescha9|C
AT1G47900	17649161-17649807	17649396	G	SNP_EI	Bak-2|A,Ey15-2|A,Fei-0|A,ICE102|A,ICE104|A,ICE107|A,ICE111|A,ICE119|A,ICE120|A,ICE163|A,ICE50|A,ICE71|A,ICE73|A,ICE79|A,ICE7|A,ICE92|A,ICE93|A,ICE97|A,ICE98|A,Istisu-1|A,Kastel-1|A,Lerik1-3|A,Pra-6|A,TueSB30-3|A,Vash-1|A
AT1G47900	17649161-17649807	17649447	T	SNP_EI	ICE33|A
AT1G47900	17649161-17649807	17649542	T	SNP_EI	ICE169|C,ICE173|C,ICE212|C,ICE213|C
AT1G47900	17649161-17649807	17649543	T	SNP_EI	Bak-2|A,Ey15-2|A,Fei-0|A,ICE102|A,ICE104|A,ICE107|A,ICE111|A,ICE119|A,ICE120|A,ICE50|A,ICE71|A,ICE79|A,ICE7|A,ICE92|A,ICE93|A,ICE97|A,ICE98|A,Istisu-1|A,Kastel-1|A,Lerik1-3|A,Pra-6|A,TueSB30-3|A,Vash-1|A
AT1G47900	17649161-17649807	17649609	C	SNP_EI	Kastel-1|A
AT1G47900	17649161-17649807	17649651	T	SNP_EI	Agu-1|C,ICE130|C,ICE138|C,ICE150|C,ICE152|C,ICE153|C,ICE29|C,ICE60|C,Sha|C,Ler-1|T
AT1G47900	17649161-17649807	17649687	A	SNP_EI	Dog-4|G,ICE1|G,ICE70|G,ICE75|G,Koch-1|G
AT1G47900	17649161-17649807	17649717	G	SNP_EI	ICE49|A
AT1G47900	17649161-17649807	17649798	G	SPLICE_SIGNAL_SNP	Dog-4|A,ICE70|A,ICE75|A,Koch-1|A
AT1G47900	17649161-17649807	17649819	C	SNP_EI	Ler-1|G
AT1G48030	17717482-17718581	17717522	G	SNP_EI	Vie-0|A
AT1G48030	17717482-17718581	17717558	A	SNP_EI	ICE49|C,ICE50|C
AT1G48030	17717482-17718581	17717564	A	SNP_EI	ICE49|G,ICE50|G
AT1G48030	17717482-17718581	17717588	C	SNP_EI	ICE49|T,ICE50|T
AT1G48030	17717482-17718581	17717590	C	SNP_EI	ICE49|A,ICE50|A
AT1G48030	17717482-17718581	17717630	G	SNP_EI	Agu-1|A,Bak-7|A,Del-10|A,Dog-4|A,Ey15-2|A,Fei-0|A,HKT2.4|A,ICE102|A,ICE104|A,ICE106|A,ICE127|A,ICE130|A,ICE134|A,ICE138|A,ICE150|A,ICE152|A,ICE153|A,ICE163|A,ICE181|A,ICE1|A,ICE29|A,ICE33|A,ICE49|A,ICE50|A,ICE60|A,ICE61|A,ICE63|A,ICE70|A,ICE71|A,ICE72|A,ICE73|A,ICE75|A,ICE91|A,ICE93|A,ICE97|A,ICE98|A,Kastel-1|A,Koch-1|A,Leo-1|A,Lerik1-3|A,Nemrut-1|A,Nie1-2|A,Ped-0|A,Qui-0|A,Sha|A,Star-8|A,TueSB30…
AT1G48030	17717482-17718581	17717666	A	SNP_EI	ICE49|G,ICE50|G
AT1G48030	17717482-17718581	17717717	C	SNP_EI	Agu-1|T,ICE181|T,Leo-1|T,Ler-0|T
AT1G48030	17717482-17718581	17717774	A	SNP_EI	ICE49|C,ICE50|C
AT1G48030	17717482-17718581	17717780	A	SNP_EI	ICE49|G,ICE50|G
AT1G48030	17717482-17718581	17717783	A	SNP_EI	ICE49|G,ICE50|G
AT1G48030	17717482-17718581	17717798	G	SNP_EI	ICE127|T,ICE134|T,ICE61|T,ICE72|T
AT1G48030	17717482-17718581	17717801	A	SNP_EI	ICE92|G,Mer-6|G
AT1G48030	17717482-17718581	17717978	G	SNP_EI	ICE49|A,ICE50|A
AT1G48030	17717482-17718581	17718002	A	SNP_EI	ICE49|T,ICE50|T
AT1G48030	17717482-17718581	17718008	C	SNP_EI	Xan-1|T
AT1G48030	17717482-17718581	17718028	C	SNP_EI	Del-10|T
AT1G48030	17717482-17718581	17718032	T	SNP_EI	ICE49|A,ICE50|A
AT1G48030	17717482-17718581	17718053	A	SNP_EI	ICE49|G,ICE50|G
AT1G48030	17717482-17718581	17718055	A	SNP_EI	ICE49|T,ICE50|T
AT1G48030	17717482-17718581	17718107	G	SNP_EI	ICE49|T,ICE50|T
AT1G48030	17717482-17718581	17718119	A	SNP_EI	ICE49|T,ICE50|T
AT1G48030	17717482-17718581	17718126	T	SNP_EI	ICE127|C,ICE134|C
AT1G48030	17717482-17718581	17718164	A	SNP_EI	ICE49|T,ICE50|T
AT1G48030	17717482-17718581	17718185	A	SNP_EI	ICE49|G,ICE50|G
AT1G48030	17717482-17718581	17718201	G	SNP_EI	ICE92|A,Mer-6|A
AT1G48030	17717482-17718581	17718311	C	SNP_EI	Qui-0|A
AT1G48030	17717482-17718581	17718348	C	SNP_EI	Ler-1|A
AT1G48030	17717482-17718581	17718362	T	SNP_EI	Ey15-2|C,ICE49|C,ICE50|C
AT1G48030	17717482-17718581	17718386	G	SNP_EI	Ey15-2|A,ICE49|A,ICE50|A
AT1G48030	17717482-17718581	17718402	A	SNP_EI	Ler-1|G
AT1G48030	17717482-17718581	17718445	C	SNP_EI	ICE104|T,ICE106|T,ICE119|T,ICE91|T,ICE93|T
AT1G48030	17717482-17718581	17718452	A	SNP_EI	ICE49|G,ICE50|G
AT1G48030	17717482-17718581	17718455	A	SNP_EI	ICE49|T,ICE50|T
AT1G48030	17717482-17718581	17718458	C	SNP_EI	ICE49|G,ICE50|G
AT1G48030	17717482-17718581	17718464	C	SNP_EI	ICE49|A,ICE50|A
AT1G48030	17717482-17718581	17718482	A	SNP_EI	ICE49|T,ICE50|T
AT1G48030	17717482-17718581	17718500	T	SNP_EI	ICE49|C,ICE50|C
AT1G48030	17717482-17718581	17718503	G	SNP_EI	ICE49|A,ICE50|A,ICE71|T,ICE97|T,ICE98|T,Nemrut-1|T,Yeg-1|T
AT1G48030	17717482-17718581	17718512	C	SNP_EI	ICE49|G,ICE50|G
AT1G48030	17717482-17718581	17718515	C	SNP_EI	ICE106|T,ICE119|T,ICE71|T,ICE91|T
AT1G48030	17717482-17718581	17718521	T	SNP_EI	ICE49|C,ICE50|C
AT1G48030	17717482-17718581	17718551	G	SNP_EI	ICE49|A,ICE50|A
AT1G48230	17807407-17807477	17807410	G	SPLICE_SIGNAL_SNP	ICE120|C,ICE169|C,ICE173|C,ICE212|C,ICE213|C,ICE226|C,ICE228|C,ICE71|C,ICE79|C,ICE98|C,Rue3-1-31|C,Vash-1|C,WalhaesB4|C,Xan-1|C
AT1G48230	17807407-17807477	17807455	T	BP_SNP	ICE49|A
AT1G48230	17807407-17807477	17807467	G	SPLICE_SIGNAL_SNP	Vash-1|A
AT1G48230	17807407-17807477	17807488	A	SNP_EI	ICE120|C,ICE169|C,ICE173|C,ICE212|C,ICE213|C,ICE226|C,ICE228|C,ICE71|C,ICE79|C,ICE98|C,Rue3-1-31|C,Vash-1|C,WalhaesB4|C,Xan-1|C
AT1G49160	18180369-18180468	18180362	A	SNP_EI	Ler-1|C
AT1G49160	18180369-18180468	18180429	G	SNP_EI	Ler-1|A
AT1G49160	18180369-18180468	18180461	C	SPLICE_SIGNAL_SNP	ICE21|T
AT1G49480	18315271-18315337	18315265	T	SNP_EI	ICE50|G
AT1G49480	18315271-18315337	18315278	C	SPLICE_SIGNAL_SNP	Cdm-0|A,ICE112|A,ICE120|A,ICE21|A,Mer-6|A
AT1G49480	18315271-18315337	18315316	C	SNP_EI	Ler-1|T
AT1G49870	18461666-18461946	18461664	A	SPLICE_SIGNAL_SNP	Ler-1|G
AT1G49870	18461666-18461946	18461693	C	SNP_EI	Ler-1|T
AT1G49870	18461666-18461946	18461716	G	SNP_EI	Ler-1|A
AT1G49870	18461666-18461946	18461733	G	SNP_EI	Ler-1|A
AT1G49870	18461666-18461946	18461741	C	SNP_EI	Ler-1|A
AT1G49870	18461666-18461946	18461832	A	SNP_EI	ICE169|G,ICE173|G
AT1G49870	18461666-18461946	18461870	C	SNP_EI	Ler-1|G
AT1G49870	18461666-18461946	18461874	A	SNP_EI	Agu-1|G,Del-10|G,Dog-4|G,Don-0|G,Ey15-2|G,Fei-0|G,HKT2.4|G,ICE107|G,ICE111|G,ICE112|G,ICE120|G,ICE127|G,ICE130|G,ICE134|G,ICE138|G,ICE150|G,ICE152|G,ICE153|G,ICE163|G,ICE169|G,ICE173|G,ICE1|G,ICE212|G,ICE213|G,ICE216|G,ICE226|G,ICE228|G,ICE29|G,ICE33|G,ICE36|G,ICE60|G,ICE61|G,ICE70|G,ICE71|G,ICE72|G,ICE73|G,ICE75|G,ICE7|G,ICE91|G,ICE93|G,ICE98|G,Istisu-1|G,Kastel-1|G,Koch-1|G,Lag2.2|G,Lerik1-3|G,…
AT1G49870	18461666-18461946	18461895	G	SNP_EI	Agu-1|A,Del-10|A,Dog-4|A,Don-0|A,Ey15-2|A,Fei-0|A,HKT2.4|A,ICE107|A,ICE111|A,ICE112|A,ICE120|A,ICE127|A,ICE130|A,ICE134|A,ICE138|A,ICE150|A,ICE152|A,ICE153|A,ICE163|A,ICE169|A,ICE173|A,ICE1|A,ICE212|A,ICE213|A,ICE216|A,ICE226|A,ICE228|A,ICE29|A,ICE33|A,ICE36|A,ICE60|A,ICE61|A,ICE70|A,ICE71|A,ICE72|A,ICE73|A,ICE75|A,ICE7|A,ICE91|A,ICE93|A,ICE98|A,Istisu-1|A,Kastel-1|A,Koch-1|A,Lag2.2|A,Lerik1-3|A,…
AT1G50250	18615940-18616195	18615944	C	SPLICE_SIGNAL_SNP	Ped-0|T
AT1G50250	18615940-18616195	18616028	A	SNP_EI	Ped-0|T
AT1G50250	18615940-18616195	18616037	A	SNP_EI	Cdm-0|G,Del-10|G,ICE138|G,ICE181|G,ICE29|G,ICE60|G,ICE70|G,ICE71|G,ICE73|G,Nemrut-1|G,Yeg-1|G
AT1G50250	18615940-18616195	18616049	A	SNP_EI	Nie1-2|G
AT1G50250	18615940-18616195	18616097	C	SNP_EI	ICE127|T,ICE130|T,ICE134|T,ICE150|T,ICE152|T,ICE153|T,ICE72|T,ICE75|T,Koch-1|T,Sha|T
AT1G50250	18615940-18616195	18616113	G	SNP_EI	Ler-1|A
AT1G50250	18615940-18616195	18616154	T	SNP_EI	Agu-1|C,Bak-7|C,Cdm-0|C,Del-10|C,Dog-4|C,Don-0|C,Ey15-2|C,Fei-0|C,HKT2.4|C,ICE102|C,ICE104|C,ICE106|C,ICE107|C,ICE111|C,ICE112|C,ICE119|C,ICE120|C,ICE127|C,ICE130|C,ICE134|C,ICE138|C,ICE150|C,ICE152|C,ICE153|C,ICE163|C,ICE169|C,ICE173|C,ICE181|C,ICE1|C,ICE212|C,ICE213|C,ICE216|C,ICE21|C,ICE29|C,ICE33|C,ICE36|C,ICE49|C,ICE50|C,ICE60|C,ICE61|C,ICE63|C,ICE70|C,ICE71|C,ICE72|C,ICE73|C,ICE75|C,ICE79|C…
AT1G50620	18750346-18750782	18750407	C	SNP_EI	ICE163|T,ICE169|T,ICE173|T,Ler-0|T
AT1G50620	18750346-18750782	18750455	T	SNP_EI	ICE106|C,ICE93|C,ICE98|C
AT1G50620	18750346-18750782	18750482	G	SNP_EI	Bak-2|A,Bak-7|A,Cdm-0|A,Dog-4|A,Ey15-2|A,Fei-0|A,HKT2.4|A,ICE102|A,ICE104|A,ICE107|A,ICE111|A,ICE112|A,ICE119|A,ICE120|A,ICE127|A,ICE130|A,ICE134|A,ICE138|A,ICE150|A,ICE152|A,ICE153|A,ICE163|A,ICE169|A,ICE173|A,ICE181|A,ICE1|A,ICE212|A,ICE213|A,ICE216|A,ICE226|A,ICE228|A,ICE29|A,ICE33|A,ICE36|A,ICE61|A,ICE63|A,ICE71|A,ICE73|A,ICE75|A,ICE79|A,ICE7|A,ICE91|A,ICE92|A,Leo-1|A,Nemrut-1|A,Nie1-2|A,Pra-…
AT1G50620	18750346-18750782	18750507	A	SNP_EI	ICE102|C,ICE33|C,ICE91|C,WalhaesB4|C
AT1G50620	18750346-18750782	18750570	G	SNP_EI	ICE106|T,ICE93|T,ICE98|T
AT1G50620	18750346-18750782	18750718	C	SNP_EI	Lag2.2|A
AT1G50620	18750346-18750782	18750772	G	SPLICE_SIGNAL_SNP	Del-10|A,ICE21|A
AT1G50820	18834004-18834100	18834028	T	SNP_EI	Istisu-1|A,Xan-1|A
AT1G50820	18834004-18834100	18834052	T	SNP_EI	ICE120|A
AT1G50820	18834004-18834100	18834107	A	SNP_EI	ICE127|T,ICE130|T,ICE134|T,ICE150|T,ICE152|T,ICE153|T,ICE1|T,ICE60|T,ICE70|T,ICE71|T,ICE72|T,ICE75|T,Koch-1|T,Rue3-1-31|T,Sha|T,TueSB30-3|T
AT1G50920	18870695-18872380	18870713	C	SNP_EI	ICE111|T,ICE112|T,Lerik1-3|T
AT1G50920	18870695-18872380	18870731	T	SNP_EI	Dog-4|C
AT1G50920	18870695-18872380	18870749	C	SNP_EI	Bak-7|A,Don-0|A
AT1G50920	18870695-18872380	18870839	T	SNP_EI	Qui-0|C
AT1G50920	18870695-18872380	18870881	C	SNP_EI	Dog-4|A
AT1G50920	18870695-18872380	18870902	A	SNP_EI	ICE111|T,ICE112|T,Lerik1-3|T
AT1G50920	18870695-18872380	18871919	T	SNP_EI	Qui-0|G
AT1G50920	18870695-18872380	18872030	G	SNP_EI	Pra-6|A
AT1G50920	18870695-18872380	18872099	C	SNP_EI	ICE226|T,ICE228|T
AT1G50920	18870695-18872380	18872202	T	SNP_EI	Agu-1|A,ICE104|A,ICE7|A
AT1G50920	18870695-18872380	18872249	G	SNP_EI	Dog-4|A,ICE111|A,ICE112|A,ICE181|A,Leo-1|A,Lerik1-3|A,Mer-6|A,TueWa1-2|A,Vie-0|A,Xan-1|A
AT1G50920	18870695-18872380	18872300	A	SNP_EI	ICE107|C
AT1G50920	18870695-18872380	18872306	G	SNP_EI	Bak-2|C,ICE102|C,ICE163|C,ICE169|C,ICE173|C,ICE212|C,ICE213|C,ICE79|C,Lag2.2|C
AT1G50920	18870695-18872380	18872393	T	SNP_EI	Don-0|G
AT1G50920	18870962-18871899	18871046	C	SNP_EI	Agu-1|T,Bak-2|T,Bak-7|T,Cdm-0|T,Del-10|T,Dog-4|T,Don-0|T,Fei-0|T,HKT2.4|T,ICE102|T,ICE104|T,ICE106|T,ICE107|T,ICE119|T,ICE120|T,ICE138|T,ICE163|T,ICE169|T,ICE173|T,ICE181|T,ICE1|T,ICE212|T,ICE213|T,ICE216|T,ICE226|T,ICE228|T,ICE29|T,ICE61|T,ICE63|T,ICE73|T,ICE79|T,ICE7|T,ICE92|T,ICE93|T,ICE98|T,Istisu-1|T,Kastel-1|T,Lag2.2|T,Leo-1|T,Mer-6|T,Nie1-2|T,Qui-0|T,Star-8|T,Tuescha9|T,TueV13|T,TueWa1-2|T…
AT1G50920	18870962-18871899	18871160	C	SNP_EI	Agu-1|A,Bak-2|A,Bak-7|A,Cdm-0|A,Del-10|A,Don-0|A,Fei-0|A,ICE102|A,ICE104|A,ICE106|A,ICE107|A,ICE119|A,ICE120|A,ICE138|A,ICE163|A,ICE169|A,ICE173|A,ICE181|A,ICE1|A,ICE212|A,ICE213|A,ICE216|A,ICE226|A,ICE228|A,ICE61|A,ICE63|A,ICE73|A,ICE79|A,ICE7|A,ICE92|A,ICE93|A,Istisu-1|A,Kastel-1|A,Lag2.2|A,Leo-1|A,Mer-6|A,Nie1-2|A,Qui-0|A,Star-8|A,Tuescha9|A,TueV13|A,TueWa1-2|A,Vie-0|A,WalhaesB4|A,Xan-1|A,Yeg-…
AT1G50920	18870962-18871899	18871325	T	SNP_EI	ICE1|C
AT1G50920	18870962-18871899	18871361	T	SNP_EI	Agu-1|G,Bak-2|G,Bak-7|G,Cdm-0|G,Del-10|G,Dog-4|G,Don-0|G,Fei-0|G,HKT2.4|G,ICE102|G,ICE104|G,ICE106|G,ICE107|G,ICE119|G,ICE120|G,ICE138|G,ICE163|G,ICE169|G,ICE173|G,ICE181|G,ICE1|G,ICE212|G,ICE213|G,ICE216|G,ICE226|G,ICE228|G,ICE29|G,ICE61|G,ICE63|G,ICE73|G,ICE79|G,ICE7|G,ICE92|G,ICE93|G,ICE98|G,Istisu-1|G,Kastel-1|G,Lag2.2|G,Leo-1|G,Mer-6|G,Nie1-2|G,Qui-0|G,Star-8|G,Tuescha9|G,TueV13|G,TueWa1-2|G…
AT1G50920	18870962-18871899	18871370	C	SNP_EI	Xan-1|T
AT1G50920	18870962-18871899	18871526	A	SNP_EI	ICE111|T,ICE112|T,Lerik1-3|T
AT1G50920	18870962-18871899	18871530	G	SNP_EI	Xan-1|A
AT1G50920	18870962-18871899	18871559	C	SNP_EI	ICE181|T,Leo-1|T,Mer-6|T,TueWa1-2|T
AT1G50920	18870962-18871899	18871586	C	SNP_EI	Don-0|T
AT1G50920	18870962-18871899	18871637	A	SNP_EI	Ler-1|C
AT1G50920	18870962-18871899	18871655	A	SNP_EI	Xan-1|G
AT1G50920	18870962-18871899	18871658	C	SNP_EI	Agu-1|T,Cdm-0|T,Del-10|T,Fei-0|T,HKT2.4|T,ICE104|T,ICE106|T,ICE107|T,ICE119|T,ICE120|T,ICE138|T,ICE1|T,ICE216|T,ICE226|T,ICE228|T,ICE29|T,ICE61|T,ICE63|T,ICE73|T,ICE7|T,ICE92|T,ICE93|T,ICE98|T,Istisu-1|T,Kastel-1|T,Nie1-2|T,Qui-0|T,Star-8|T,Tuescha9|T,TueV13|T,WalhaesB4|T,Yeg-1|T,Ler-0|T
AT1G50920	18870962-18871899	18871758	A	SNP_EI	Agu-1|G,Bak-2|G,Bak-7|G,Cdm-0|G,Del-10|G,Dog-4|G,Don-0|G,Fei-0|G,HKT2.4|G,ICE102|G,ICE104|G,ICE106|G,ICE107|G,ICE119|G,ICE120|G,ICE138|G,ICE163|G,ICE169|G,ICE173|G,ICE181|G,ICE1|G,ICE212|G,ICE213|G,ICE216|G,ICE226|G,ICE228|G,ICE29|G,ICE36|G,ICE61|G,ICE63|G,ICE73|G,ICE79|G,ICE7|G,ICE92|G,ICE93|G,ICE98|G,Istisu-1|G,Kastel-1|G,Lag2.2|G,Leo-1|G,Mer-6|G,Nie1-2|G,Qui-0|G,Star-8|G,Tuescha9|G,TueV13|G,Tu…
AT1G50920	18870962-18871899	18871787	G	SNP_EI	Don-0|C,Ped-0|T
AT1G50920	18870962-18871899	18871794	G	SNP_EI	ICE61|C
AT1G50920	18870962-18871899	18871795	A	SNP_EI	ICE106|T,ICE92|T,ICE93|T
AT1G50920	18870962-18871899	18871848	C	SNP_EI	Ler-1|G
AT1G51570	19122696-19124628	19122889	C	SNP_EI	Agu-1|A,Dog-4|A,Istisu-1|A,Lag2.2|A,TueWa1-2|A
AT1G51570	19122696-19124628	19122892	A	SNP_EI	Bak-7|G,Nemrut-1|G
AT1G51570	19122696-19124628	19123048	C	SNP_EI	Agu-1|T,Dog-4|T,HKT2.4|T,ICE181|T,ICE1|T,ICE226|T,ICE228|T,ICE49|T,ICE50|T,ICE97|T,Istisu-1|T,Lag2.2|T,Lerik1-3|T,TueWa1-2|T
AT1G51570	19122696-19124628	19123066	C	SNP_EI	Agu-1|T,Dog-4|T,HKT2.4|T,ICE181|T,ICE1|T,ICE226|T,ICE228|T,ICE49|T,ICE50|T,ICE97|T,Istisu-1|T,Lag2.2|T,Lerik1-3|T,TueWa1-2|T
AT1G51570	19122696-19124628	19123069	T	SNP_EI	Agu-1|C,Dog-4|C,HKT2.4|C,ICE181|C,ICE1|C,ICE226|C,ICE228|C,ICE49|C,ICE50|C,ICE97|C,Istisu-1|C,Lag2.2|C,Lerik1-3|C,TueWa1-2|C
AT1G51570	19122696-19124628	19123204	C	SNP_EI	Agu-1|T,Dog-4|T,Istisu-1|T,Lag2.2|T,TueWa1-2|T
AT1G51570	19122696-19124628	19123210	C	SNP_EI	Agu-1|A,Dog-4|A,Istisu-1|A,Lag2.2|A,TueWa1-2|A
AT1G51570	19122696-19124628	19123234	C	SNP_EI	ICE49|T
AT1G51570	19122696-19124628	19123286	C	SNP_EI	ICE150|T,ICE152|T
AT1G51570	19122696-19124628	19123315	C	SNP_EI	Dog-4|T,Istisu-1|T,Lag2.2|T
AT1G51570	19122696-19124628	19123351	G	SNP_EI	ICE134|A,ICE150|A,ICE152|A,ICE153|A,ICE60|A,ICE61|A,ICE70|A,ICE71|A,ICE72|A,ICE75|A,Koch-1|A,Sha|A
AT1G51570	19122696-19124628	19123477	C	SNP_EI	Dog-4|T,Istisu-1|T,Lag2.2|T
AT1G51570	19122696-19124628	19123519	C	SNP_EI	Bak-2|T,ICE73|T
AT1G51570	19122696-19124628	19123654	A	SNP_EI	Mer-6|G
AT1G51570	19122696-19124628	19123867	C	SNP_EI	ICE50|T
AT1G51570	19122696-19124628	19124146	A	SNP_EI	ICE1|T
AT1G51570	19122696-19124628	19124215	T	SNP_EI	Ped-0|C
AT1G51570	19122696-19124628	19124416	G	SNP_EI	Agu-1|A,Dog-4|A,Istisu-1|A,Lag2.2|A,Lerik1-3|A,TueWa1-2|A
AT1G51570	19122696-19124628	19124455	G	SNP_EI	Agu-1|A,Dog-4|A,Istisu-1|A,Lag2.2|A,Lerik1-3|A,TueWa1-2|A
AT1G51570	19122696-19124628	19124533	T	SNP_EI	ICE50|A
AT1G51570	19122696-19124628	19124596	T	SNP_EI	Agu-1|A,Dog-4|A,Istisu-1|A,Lag2.2|A,Lerik1-3|A,TueWa1-2|A
AT1G51570	19122696-19124628	19124602	T	SNP_EI	Agu-1|C,Dog-4|C,Istisu-1|C,Lag2.2|C,Lerik1-3|C,TueWa1-2|C
AT1G51570	19122696-19124628	19124632	A	SNP_EI	ICE73|T
AT1G51570	19122696-19124628	19124640	G	SNP_EI	ICE216|A
AT1G51850	19254174-19254276	19254173	T	SPLICE_SIGNAL_SNP	Ler-0|C
AT1G51850	19254174-19254276	19254185	A	SNP_EI	Ler-1|G
AT1G51850	19254174-19254276	19254188	A	SNP_EI	Cdm-0|G,ICE134|G,ICE150|G,Rue3-1-31|G,TueSB30-3|G,Ler-0|G
AT1G51850	19254174-19254276	19254213	G	SNP_EI	Ler-1|T
AT1G51850	19254174-19254276	19254221	T	SNP_EI	Agu-1|C
AT1G51850	19254174-19254276	19254253	T	SNP_EI	Agu-1|C
AT1G51850	19254174-19254276	19254273	C	BP_SNP	Ler-1|T
AT1G51850	19254174-19254276	19254275	C	BP_SNP	ICE106|T
AT1G51850	19254174-19254276	19254284	C	SNP_EI	Agu-1|T,ICE127|T,ICE130|T,ICE61|T,ICE70|T,ICE72|T,ICE73|T
AT1G51850	19255724-19255822	19255730	C	SPLICE_SIGNAL_SNP	Ler-1|A
AT1G51850	19255724-19255822	19255734	T	SPLICE_SIGNAL_SNP	Ler-1|G
AT1G51850	19255724-19255822	19255779	C	SNP_EI	Ler-1|T
AT1G51850	19255724-19255822	19255798	G	SNP_EI	Ler-1|A
AT1G51850	19255724-19255822	19255809	C	SNP_EI	Ler-1|G
AT1G51850	19255724-19255822	19255810	A	SNP_EI	Ler-1|G
AT1G51850	19255724-19255822	19255825	T	SNP_EI	Ler-1|C
AT1G51850	19255724-19255822	19255830	T	SNP_EI	Ler-1|A
AT1G52290	19471769-19471865	19471773	C	SPLICE_SIGNAL_SNP	ICE92|T,Nie1-2|T
AT1G52290	19471769-19471865	19471778	T	SPLICE_SIGNAL_SNP	Ler-1|A
AT1G52290	19471769-19471865	19471780	C	SNP_EI	Ler-1|A
AT1G52290	19471769-19471865	19471788	A	SNP_EI	Bak-2|T,Bak-7|T,Del-10|T,Ey15-2|T,HKT2.4|T,ICE107|T,ICE127|T,ICE130|T,ICE181|T,ICE1|T,ICE216|T,ICE21|T,ICE226|T,ICE228|T,ICE29|T,ICE33|T,ICE36|T,ICE72|T,ICE79|T,Istisu-1|T,Kastel-1|T,Lag2.2|T,Leo-1|T,Lerik1-3|T,Nemrut-1|T,Pra-6|T,Tuescha9|T,Vash-1|T
AT1G52290	19471769-19471865	19471880	A	SNP_EI	HKT2.4|G,Lag2.2|G,Tuescha9|G
AT1G53250	19857843-19857948	19857840	A	SNP_EI	Ler-1|G
AT1G53250	19857843-19857948	19857845	T	BP_SNP	Ler-1|C
AT1G53250	19857843-19857948	19857877	A	SNP_EI	Nemrut-1|C
AT1G53250	19857843-19857948	19857891	T	SNP_EI	Don-0|C
AT1G53250	19857843-19857948	19857895	A	SNP_EI	TueV13|T
AT1G53250	19857843-19857948	19857909	A	SNP_EI	Ler-1|C
AT1G53250	19857843-19857948	19857911	A	SNP_EI	Bak-7|G
AT1G53340	19899484-19900619	19899492	A	SPLICE_SIGNAL_SNP	Agu-1|T,Bak-2|T,Bak-7|T,Cdm-0|T,Del-10|T,Ey15-2|T,Fei-0|T,HKT2.4|T,ICE102|T,ICE104|T,ICE106|T,ICE107|T,ICE111|T,ICE112|T,ICE119|T,ICE120|T,ICE127|T,ICE130|T,ICE134|T,ICE138|T,ICE150|T,ICE152|T,ICE153|T,ICE163|T,ICE169|T,ICE173|T,ICE181|T,ICE212|T,ICE213|T,ICE216|T,ICE21|T,ICE226|T,ICE228|T,ICE29|T,ICE36|T,ICE50|T,ICE60|T,ICE63|T,ICE71|T,ICE72|T,ICE73|T,ICE75|T,ICE79|T,ICE7|T,ICE91|T,ICE92|T,ICE93…
AT1G53340	19899484-19900619	19899543	A	SNP_EI	Dog-4|T,ICE49|T,Nemrut-1|T,Pra-6|T,Vie-0|T
AT1G53340	19899484-19900619	19899551	T	SNP_EI	Ler-1|G
AT1G53340	19899484-19900619	19899588	A	SNP_EI	Agu-1|G,Bak-2|G,Bak-7|G,Cdm-0|G,Del-10|G,Dog-4|G,Don-0|G,Ey15-2|G,Fei-0|G,HKT2.4|G,ICE102|G,ICE104|G,ICE106|G,ICE107|G,ICE111|G,ICE112|G,ICE119|G,ICE120|G,ICE127|G,ICE130|G,ICE134|G,ICE138|G,ICE150|G,ICE152|G,ICE153|G,ICE163|G,ICE169|G,ICE173|G,ICE181|G,ICE1|G,ICE212|G,ICE213|G,ICE216|G,ICE21|G,ICE226|G,ICE228|G,ICE29|G,ICE36|G,ICE49|G,ICE50|G,ICE60|G,ICE61|G,ICE63|G,ICE70|G,ICE71|G,ICE72|G,ICE73…
AT1G53340	19899484-19900619	19899597	T	SNP_EI	Ler-1|A
AT1G53340	19899484-19900619	19899623	G	SNP_EI	Dog-4|A,ICE49|A,Nemrut-1|A,Pra-6|A
AT1G53340	19899484-19900619	19899628	C	SNP_EI	Vie-0|A
AT1G53340	19899484-19900619	19899653	T	SNP_EI	Dog-4|C,ICE49|C,Nemrut-1|C,Pra-6|C,Vie-0|C
AT1G53340	19899484-19900619	19899654	A	SNP_EI	Dog-4|G,ICE49|G,Nemrut-1|G,Pra-6|G,Vie-0|G
AT1G53340	19899484-19900619	19899662	C	SNP_EI	ICE181|T
AT1G53340	19899484-19900619	19899672	G	SNP_EI	Kastel-1|A
AT1G53340	19899484-19900619	19899678	A	SNP_EI	ICE70|C
AT1G53340	19899484-19900619	19899735	G	SNP_EI	ICE29|A,Mer-6|A
AT1G53340	19899484-19900619	19899743	C	SNP_EI	Dog-4|G
AT1G53340	19899484-19900619	19899758	C	SNP_EI	Agu-1|A,Bak-2|A,Cdm-0|A,Del-10|A,Dog-4|A,Fei-0|A,HKT2.4|A,ICE102|A,ICE112|A,ICE127|A,ICE130|A,ICE134|A,ICE138|A,ICE150|A,ICE152|A,ICE153|A,ICE163|A,ICE181|A,ICE29|A,ICE36|A,ICE49|A,ICE50|A,ICE60|A,ICE63|A,ICE71|A,ICE72|A,ICE75|A,ICE79|A,ICE7|A,ICE98|G,Nemrut-1|A,Mer-6|A,Nie1-2|A,Pra-6|A,Qui-0|A,Rue3-1-31|A,Sha|A,Tuescha9|A,TueV13|A,TueWa1-2|A,Vash-1|A,Vie-0|A,WalhaesB4|A,Yeg-1|A
AT1G53340	19899484-19900619	19899759	T	SNP_EI	ICE61|C,ICE70|C,Koch-1|C
AT1G53340	19899484-19900619	19899770	C	SNP_EI	Dog-4|T,ICE49|T,ICE92|T,Kastel-1|T,Nemrut-1|T,Pra-6|T,Star-8|T,Vie-0|T
AT1G53340	19899484-19900619	19899783	C	SNP_EI	ICE71|T,TueV13|T,Vash-1|T
AT1G53340	19899484-19900619	19899790	G	SNP_EI	ICE92|A,Kastel-1|A,Star-8|A
AT1G53340	19899484-19900619	19899796	G	SNP_EI	Ped-0|T
AT1G53340	19899484-19900619	19899816	A	SNP_EI	ICE92|G,Star-8|G
AT1G53340	19899484-19900619	19899818	C	SNP_EI	Dog-4|A
AT1G53340	19899484-19900619	19899823	G	SNP_EI	ICE7|T,ICE92|T,Kastel-1|T,Star-8|T
AT1G53340	19899484-19900619	19899831	G	SNP_EI	Dog-4|A,ICE49|A,Nemrut-1|A,Pra-6|A,Vie-0|A
AT1G53340	19899484-19900619	19899832	G	SNP_EI	Kastel-1|A,Star-8|A
AT1G53340	19899484-19900619	19899860	A	SNP_EI	Vie-0|G
AT1G53340	19899484-19900619	19899867	G	SNP_EI	Dog-4|A,ICE49|A,Nemrut-1|A,Pra-6|A,Vie-0|A
AT1G53340	19899484-19900619	19899873	T	SNP_EI	ICE92|G,Kastel-1|G,Star-8|G
AT1G53340	19899484-19900619	19899891	T	SNP_EI	ICE60|G,ICE92|G,Kastel-1|G,Star-8|G,WalhaesB4|G,Xan-1|G
AT1G53340	19899484-19900619	19899893	T	SNP_EI	ICE60|C,ICE92|C,Kastel-1|C,Star-8|C,WalhaesB4|C
AT1G53340	19899484-19900619	19899908	T	SNP_EI	Agu-1|C,Bak-2|C,Bak-7|C,Cdm-0|C,Del-10|C,Dog-4|C,Don-0|C,Ey15-2|C,Fei-0|C,HKT2.4|C,ICE102|C,ICE106|C,ICE107|C,ICE111|C,ICE112|C,ICE119|C,ICE127|C,ICE130|C,ICE134|C,ICE138|C,ICE150|C,ICE152|C,ICE153|C,ICE163|C,ICE169|C,ICE173|C,ICE181|C,ICE1|C,ICE212|C,ICE213|C,ICE216|C,ICE21|C,ICE226|C,ICE228|C,ICE29|C,ICE36|C,ICE49|C,ICE50|C,ICE60|C,ICE61|C,ICE63|C,ICE70|C,ICE71|C,ICE72|C,ICE73|C,ICE75|C,ICE79|C…
AT1G53340	19899484-19900619	19899910	C	SNP_EI	Ler-1|G
AT1G53340	19899484-19900619	19899970	G	SNP_EI	ICE104|A,ICE120|A,ICE33|A
AT1G53340	19899484-19900619	19899973	T	SNP_EI	Ler-1|C
AT1G53340	19899484-19900619	19899985	A	SNP_EI	ICE104|C,ICE120|C,ICE33|C
AT1G53340	19899484-19900619	19900006	T	SNP_EI	Agu-1|G,Cdm-0|G,Del-10|G,Fei-0|G,ICE102|G,ICE112|G,ICE127|G,ICE130|G,ICE134|G,ICE150|G,ICE152|G,ICE153|G,ICE181|G,ICE29|G,ICE36|G,ICE50|G,ICE72|G,ICE75|G,ICE79|G,ICE7|G,Mer-6|G,Qui-0|G,Sha|G,TueV13|G,TueWa1-2|G,Vash-1|G,WalhaesB4|G,Yeg-1|G
AT1G53340	19899484-19900619	19900029	G	SNP_EI	Dog-4|A
AT1G53340	19899484-19900619	19900037	C	SNP_EI	ICE73|T,ICE92|T,Kastel-1|T,Lag2.2|T,Star-8|T,WalhaesB4|T
AT1G53340	19899484-19900619	19900038	C	SNP_EI	ICE73|G,ICE92|G,Star-8|G,WalhaesB4|G
AT1G53340	19899484-19900619	19900050	A	SNP_EI	Agu-1|G,Bak-2|G,Bak-7|G,Cdm-0|G,Del-10|G,Don-0|G,Ey15-2|G,Fei-0|G,HKT2.4|G,ICE102|G,ICE106|G,ICE107|G,ICE111|G,ICE112|G,ICE119|G,ICE127|G,ICE130|G,ICE134|G,ICE138|G,ICE150|G,ICE152|G,ICE153|G,ICE163|G,ICE169|G,ICE173|G,ICE181|G,ICE1|G,ICE212|G,ICE213|G,ICE216|G,ICE21|G,ICE226|G,ICE228|G,ICE29|G,ICE36|G,ICE50|G,ICE60|G,ICE61|G,ICE63|G,ICE70|G,ICE71|G,ICE72|G,ICE73|G,ICE75|G,ICE79|G,ICE7|G,ICE91|G,…
AT1G53340	19899484-19900619	19900051	A	SNP_EI	ICE106|T,ICE119|T,ICE91|T,ICE97|T,ICE98|T
AT1G53340	19899484-19900619	19900097	T	SNP_EI	ICE104|G
AT1G53340	19899484-19900619	19900101	A	SNP_EI	ICE130|G,ICE138|G,ICE169|G,ICE1|G,ICE212|G,ICE213|G,ICE21|G,ICE33|G,ICE92|G,Istisu-1|G,Kastel-1|G,Lag2.2|G,Star-8|G,WalhaesB4|G,Xan-1|G
AT1G53340	19899484-19900619	19900140	G	SNP_EI	ICE107|A,ICE111|A,ICE119|A,ICE169|A,ICE173|A,ICE213|A,ICE216|A,ICE226|A,ICE228|A,ICE91|A,ICE93|A,ICE98|A,Istisu-1|A,Lag2.2|A,TueSB30-3|A,Xan-1|A,Ler-0|A
AT1G53340	19899484-19900619	19900172	G	SNP_EI	Del-10|C
AT1G53340	19899484-19900619	19900197	T	SNP_EI	ICE50|A
AT1G53340	19899484-19900619	19900203	A	SNP_EI	Agu-1|G,Bak-2|G,Bak-7|G,Cdm-0|G,Del-10|G,Don-0|G,Ey15-2|G,Fei-0|G,HKT2.4|G,ICE102|G,ICE106|G,ICE107|G,ICE111|G,ICE112|G,ICE119|G,ICE127|G,ICE130|G,ICE134|G,ICE138|G,ICE150|G,ICE152|G,ICE153|G,ICE181|G,ICE212|G,ICE213|G,ICE21|G,ICE226|G,ICE228|G,ICE29|G,ICE36|G,ICE50|G,ICE60|G,ICE63|G,ICE71|G,ICE72|G,ICE73|G,ICE75|G,ICE79|G,ICE7|G,ICE91|G,ICE93|G,ICE97|G,ICE98|G,Istisu-1|G,Lag2.2|G,Leo-1|G,Lerik1-…
AT1G53340	19899484-19900619	19900212	A	SNP_EI	ICE21|T
AT1G53340	19899484-19900619	19900252	G	SNP_EI	Agu-1|A,ICE50|A
AT1G53340	19899484-19900619	19900264	T	SNP_EI	Ler-1|G
AT1G53340	19899484-19900619	19900300	G	SNP_EI	Bak-7|C,Pra-6|A
AT1G53340	19899484-19900619	19900316	A	SNP_EI	Pra-6|C
AT1G53340	19899484-19900619	19900345	C	SNP_EI	ICE102|G
AT1G53340	19899484-19900619	19900352	A	SNP_EI	ICE106|T
AT1G53340	19899484-19900619	19900359	G	SNP_EI	ICE49|T
AT1G53340	19899484-19900619	19900382	A	SNP_EI	ICE29|G
AT1G53340	19899484-19900619	19900402	G	SNP_EI	Dog-4|T
AT1G53340	19899484-19900619	19900494	A	SNP_EI	Del-10|G,ICE111|G,Ler-0|G
AT1G53340	19899484-19900619	19900502	T	SNP_EI	ICE104|A,ICE36|A,ICE60|A,ICE71|A,ICE73|A,Istisu-1|A,Kastel-1|A,Nie1-2|A,Rue3-1-31|A,Star-8|A,Tuescha9|A
AT1G53340	19899484-19900619	19900562	C	SNP_EI	Del-10|T,ICE138|T,ICE60|T,ICE75|T
AT1G53340	19899484-19900619	19900564	T	SNP_EI	Kastel-1|A,Star-8|A
AT1G53340	19899484-19900619	19900582	T	SNP_EI	Dog-4|C,Ey15-2|C,ICE104|C,ICE106|C,ICE119|C,ICE120|C,ICE169|C,ICE173|C,ICE181|C,ICE1|C,ICE212|C,ICE213|C,ICE216|C,ICE49|C,ICE61|C,ICE70|C,ICE91|C,ICE92|C,ICE97|C,Koch-1|C,Leo-1|C,Nemrut-1|C,Pra-6|C,Vie-0|C
AT1G53340	19899484-19900619	19900583	T	SNP_EI	Ey15-2|C,ICE104|C,ICE106|C,ICE119|C,ICE120|C,ICE169|C,ICE173|C,ICE181|C,ICE212|C,ICE213|C,ICE216|C,ICE49|C,ICE91|C,ICE92|C,ICE97|C,Leo-1|C,Nemrut-1|C,Pra-6|C
AT1G53340	19899484-19900619	19900620	G	SPLICE_SIGNAL_SNP	Bak-7|A,Don-0|A,ICE226|A,ICE228|A,Ped-0|A
AT1G53350	19904180-19904280	19904188	C	SPLICE_SIGNAL_SNP	Agu-1|A,Bak-2|A,Bak-7|A,Cdm-0|A,Del-10|A,Ey15-2|A,Fei-0|A,HKT2.4|A,ICE102|A,ICE107|A,ICE111|A,ICE112|A,ICE119|A,ICE120|A,ICE127|A,ICE130|A,ICE134|A,ICE138|A,ICE150|A,ICE152|A,ICE153|A,ICE163|A,ICE169|A,ICE173|A,ICE212|A,ICE213|A,ICE216|A,ICE226|A,ICE228|A,ICE29|A,ICE33|A,ICE49|A,ICE50|A,ICE60|A,ICE61|A,ICE63|A,ICE70|A,ICE71|A,ICE72|A,ICE75|A,ICE79|A,ICE7|A,ICE91|A,ICE93|A,ICE98|A,Istisu-1|A,Kaste…
AT1G53350	19904180-19904280	19904190	C	SPLICE_SIGNAL_SNP	ICE49|T,Vie-0|T
AT1G53350	19904180-19904280	19904213	T	SNP_EI	Agu-1|A,Bak-2|A,Bak-7|A,Cdm-0|A,Del-10|A,Ey15-2|A,Fei-0|A,HKT2.4|A,ICE102|A,ICE107|A,ICE111|A,ICE112|A,ICE119|A,ICE120|A,ICE127|A,ICE130|A,ICE134|A,ICE138|A,ICE150|A,ICE152|A,ICE153|A,ICE163|A,ICE169|A,ICE173|A,ICE212|A,ICE213|A,ICE216|A,ICE226|A,ICE228|A,ICE29|A,ICE33|A,ICE49|A,ICE50|A,ICE60|A,ICE61|A,ICE63|A,ICE70|A,ICE71|A,ICE72|A,ICE73|A,ICE75|A,ICE79|A,ICE7|A,ICE91|A,ICE93|A,ICE98|A,Istisu-1…
AT1G53350	19904180-19904280	19904233	T	SNP_EI	Bak-7|C
AT1G53645	20027677-20027772	20027740	C	SNP_EI	Pra-6|T
AT1G53645	20027677-20027772	20027780	C	SNP_EI	Ey15-2|T,Star-8|T
AT1G53790	20080346-20080458	20080351	A	SPLICE_SIGNAL_SNP	ICE21|G,Qui-0|G
AT1G53790	20080346-20080458	20080415	G	SNP_EI	ICE70|A,Yeg-1|A
AT1G53790	20080346-20080458	20080429	A	SNP_EI	ICE21|G,Qui-0|G
AT1G53790	20080346-20080458	20080434	C	SNP_EI	Bak-2|T
AT1G53790	20080346-20080458	20080441	A	SNP_EI	ICE21|G,Qui-0|G
AT1G53790	20080346-20080458	20080445	A	SNP_EI	ICE21|G,Qui-0|G
AT1G53790	20080346-20080458	20080468	C	SNP_EI	Ler-1|A
AT1G53830	20099540-20099702	20099590	G	SNP_EI	Ler-1|A
AT1G53830	20099540-20099702	20099598	T	SNP_EI	Ler-1|G
AT1G53830	20099540-20099702	20099699	G	SPLICE_SIGNAL_SNP	ICE106|C
AT1G54390	20305171-20305255	20305205	C	SNP_EI	Don-0|T,Ped-0|T
AT1G54390	20305171-20305255	20305211	T	BP_SNP	Dog-4|A,Don-0|A,Ped-0|A
AT1G54390	20305171-20305255	20305249	G	SPLICE_SIGNAL_SNP	Dog-4|A,Don-0|A,ICE138|A,ICE75|A,Ped-0|A
AT1G54390	20305458-20305555	20305452	T	SNP_EI	Dog-4|C,Don-0|C,Ped-0|C
AT1G54390	20305458-20305555	20305511	A	SNP_EI	Dog-4|G,Don-0|G,Ped-0|G
AT1G54390	20305458-20305555	20305564	C	SNP_EI	Dog-4|G,Don-0|G,ICE138|G,ICE75|G,Ped-0|G
AT1G55280	20624013-20624117	20624024	T	SNP_EI	ICE79|G,Istisu-1|G,Lag2.2|G,Ler-0|G
AT1G55280	20624013-20624117	20624105	A	SNP_EI	ICE49|T,ICE50|T
AT1G55530	20730001-20730101	20730024	A	SNP_EI	ICE212|C,ICE213|C
AT1G55530	20730001-20730101	20730027	A	SNP_EI	Ler-1|T
AT1G55530	20730001-20730101	20730096	T	BP_SNP	Ler-1|C
AT1G55530	20730429-20730490	20730418	G	SNP_EI	Ler-1|T
AT1G55530	20730429-20730490	20730427	T	SPLICE_SIGNAL_SNP	Ler-1|C
AT1G55530	20730429-20730490	20730454	A	BP_SNP	Ler-1|G
AT1G55530	20730429-20730490	20730459	G	SNP_EI	Ler-1|A
AT1G56070	20968472-20970216	20968458	C	SNP_EI	ICE138|T,ICE181|T,ICE71|T,ICE72|T
AT1G56070	20968472-20970216	20968464	T	SNP_EI	Agu-1|C,Bak-2|C,Bak-7|C,Cdm-0|C,Del-10|C,Dog-4|C,Don-0|C,Ey15-2|C,Fei-0|C,HKT2.4|C,ICE102|C,ICE104|C,ICE106|C,ICE107|C,ICE111|C,ICE112|C,ICE119|C,ICE120|C,ICE127|C,ICE130|C,ICE138|C,ICE150|C,ICE152|C,ICE153|C,ICE163|C,ICE169|C,ICE173|C,ICE181|C,ICE1|C,ICE216|C,ICE21|C,ICE226|C,ICE228|C,ICE33|C,ICE36|C,ICE63|C,ICE71|C,ICE72|C,ICE73|C,ICE7|C,ICE91|C,ICE92|C,ICE93|C,ICE97|C,ICE98|C,Kastel-1|C,Koch-1…
AT1G56070	20968472-20970216	20968536	C	SNP_EI	WalhaesB4|A
AT1G56070	20968472-20970216	20968542	G	SNP_EI	Don-0|A
AT1G56070	20968571-20970342	20968581	A	SPLICE_SIGNAL_SNP	Agu-1|G
AT1G56070	20968571-20970342	20968617	T	SNP_EI	Agu-1|C,Bak-2|C,Bak-7|C,Cdm-0|C,Del-10|C,Dog-4|C,Ey15-2|C,Fei-0|C,HKT2.4|C,ICE102|C,ICE104|C,ICE106|C,ICE107|C,ICE111|C,ICE112|C,ICE119|C,ICE120|C,ICE127|C,ICE130|C,ICE150|C,ICE152|C,ICE153|C,ICE163|C,ICE169|C,ICE173|C,ICE1|C,ICE216|C,ICE21|C,ICE226|C,ICE228|C,ICE33|C,ICE36|C,ICE63|C,ICE73|C,ICE7|C,ICE91|C,ICE92|C,ICE93|C,ICE97|C,ICE98|C,Kastel-1|C,Koch-1|C,Lag2.2|C,Leo-1|C,Nemrut-1|C,Mer-6|C,Pra…
AT1G56070	20968571-20970342	20968632	G	SNP_EI	Agu-1|A,Bak-2|A,Bak-7|A,Cdm-0|A,Dog-4|A,Ey15-2|A,Fei-0|A,HKT2.4|A,ICE102|A,ICE104|A,ICE106|A,ICE107|A,ICE111|A,ICE112|A,ICE119|A,ICE120|A,ICE163|A,ICE169|A,ICE173|A,ICE1|A,ICE216|A,ICE21|A,ICE226|A,ICE228|A,ICE33|A,ICE36|A,ICE63|A,ICE73|A,ICE7|A,ICE91|A,ICE92|A,ICE93|A,ICE97|A,ICE98|A,Kastel-1|A,Lag2.2|A,Leo-1|A,Nemrut-1|A,Mer-6|A,Pra-6|A,Qui-0|A,Rue3-1-31|A,Star-8|A,TueSB30-3|A,Tuescha9|A,TueV13…
AT1G56070	20968571-20970342	20968710	T	SNP_EI	Agu-1|G,Bak-2|G,Bak-7|G,Cdm-0|G,Del-10|G,Dog-4|G,Ey15-2|G,Fei-0|G,HKT2.4|G,ICE102|G,ICE104|G,ICE106|G,ICE107|G,ICE111|G,ICE112|G,ICE119|G,ICE120|G,ICE127|G,ICE130|G,ICE150|G,ICE152|G,ICE153|G,ICE163|G,ICE169|G,ICE173|G,ICE1|G,ICE216|G,ICE21|G,ICE226|G,ICE228|G,ICE33|G,ICE36|G,ICE63|G,ICE73|G,ICE7|G,ICE91|G,ICE92|G,ICE93|G,ICE97|G,ICE98|G,Kastel-1|G,Koch-1|G,Lag2.2|G,Leo-1|G,Nemrut-1|G,Mer-6|G,Pra…
AT1G56070	20968571-20970342	20968848	C	SNP_EI	ICE107|A,ICE33|A
AT1G56070	20968571-20970342	20970348	T	SNP_EI	ICE134|A,ICE49|A,ICE50|A,ICE60|A,ICE61|A,ICE70|A,ICE75|A,Ped-0|A
AT1G56070	20968571-20970342	20970351	A	SNP_EI	Ped-0|G,Ler-0|G
AT1G56070	20968976-20970237	20969028	C	SNP_EI	Dog-4|T,ICE138|T
AT1G56070	20968976-20970237	20969088	G	SNP_EI	Don-0|C,ICE134|C,ICE138|C,ICE181|C,ICE49|C,ICE50|C,ICE60|C,ICE61|C,ICE70|C,ICE71|C,ICE72|C,ICE75|C,Ped-0|C
AT1G56070	20968976-20970237	20969109	G	SNP_EI	ICE181|A
AT1G56070	20968976-20970237	20969121	A	SNP_EI	Don-0|C,ICE134|C,ICE138|C,ICE181|C,ICE49|C,ICE50|C,ICE60|C,ICE61|C,ICE70|C,ICE71|C,ICE72|C,ICE75|C,Ped-0|C
AT1G56070	20968976-20970237	20969178	T	SNP_EI	Don-0|G,ICE134|G,ICE138|G,ICE181|G,ICE49|G,ICE50|G,ICE60|G,ICE61|G,ICE70|G,ICE71|G,ICE72|G,ICE75|G,Ped-0|G
AT1G56070	20968976-20970237	20969235	A	SNP_EI	Don-0|C,ICE134|C,ICE138|C,ICE181|C,ICE49|C,ICE50|C,ICE60|C,ICE61|C,ICE70|C,ICE71|C,ICE72|C,ICE75|C,Ped-0|C
AT1G56070	20968976-20970237	20969337	A	SNP_EI	Don-0|G,ICE134|G,ICE138|G,ICE181|G,ICE49|G,ICE50|G,ICE60|G,ICE61|G,ICE70|G,ICE71|G,ICE72|G,ICE75|G,Ped-0|G
AT1G56070	20968976-20970237	20969355	A	SNP_EI	Don-0|G,ICE134|G,ICE138|G,ICE181|G,ICE49|G,ICE50|G,ICE60|G,ICE61|G,ICE70|G,ICE71|G,ICE72|G,ICE75|G,Ped-0|G
AT1G56070	20968976-20970237	20969478	G	SNP_EI	Don-0|A,ICE134|A,ICE138|A,ICE181|A,ICE49|A,ICE50|A,ICE60|A,ICE61|A,ICE70|A,ICE71|A,ICE72|A,ICE75|A,Ped-0|A
AT1G56070	20968976-20970237	20969481	A	SNP_EI	ICE134|T,ICE49|T,ICE50|T,ICE60|T,ICE61|T,ICE70|T,ICE75|T,Ped-0|T
AT1G56070	20968976-20970237	20969520	A	SNP_EI	ICE134|G,ICE49|G,ICE50|G,ICE60|G,ICE61|G,ICE70|G,ICE75|G,Ped-0|G
AT1G56070	20968976-20970237	20969526	G	SNP_EI	Don-0|A
AT1G56070	20968976-20970237	20969528	T	SNP_EI	Don-0|C,ICE134|C,ICE138|C,ICE181|C,ICE49|C,ICE50|C,ICE60|C,ICE61|C,ICE70|C,ICE71|C,ICE72|C,ICE75|C,Ped-0|C
AT1G56070	20968976-20970237	20969559	T	SNP_EI	Ler-1|G
AT1G56070	20968976-20970237	20969592	G	SNP_EI	Don-0|A,ICE134|A,ICE138|A,ICE181|A,ICE49|A,ICE50|A,ICE60|A,ICE61|A,ICE70|A,ICE71|A,ICE72|A,ICE75|A,Ped-0|A
AT1G56070	20968976-20970237	20969616	A	SNP_EI	Don-0|G,ICE134|G,ICE138|G,ICE181|G,ICE49|G,ICE50|G,ICE60|G,ICE61|G,ICE70|G,ICE71|G,ICE72|G,ICE75|G,Ped-0|G
AT1G56070	20968976-20970237	20969673	C	SNP_EI	Don-0|T,ICE134|T,ICE138|T,ICE181|T,ICE49|T,ICE50|T,ICE60|T,ICE61|T,ICE70|T,ICE71|T,ICE72|T,Ped-0|T
AT1G56070	20968976-20970237	20969703	A	SNP_EI	Don-0|G,ICE134|G,ICE138|G,ICE181|G,ICE49|G,ICE50|G,ICE60|G,ICE61|G,ICE70|G,ICE71|G,ICE72|G,ICE75|G,Ped-0|G
AT1G56070	20968976-20970237	20969751	A	SNP_EI	ICE63|G
AT1G56070	20968976-20970237	20969880	C	SNP_EI	ICE134|T,ICE49|T,ICE50|T,ICE60|T,ICE61|T,ICE70|T,ICE75|T,Ped-0|T
AT1G56070	20968976-20970237	20969901	A	SNP_EI	Don-0|G,ICE134|G,ICE138|G,ICE181|G,ICE49|G,ICE50|G,ICE60|G,ICE61|G,ICE70|G,ICE71|G,ICE72|G,ICE75|G,Ped-0|G
AT1G56070	20968976-20970237	20969928	A	SNP_EI	Don-0|G,ICE134|G,ICE138|G,ICE181|G,ICE49|G,ICE50|G,ICE60|G,ICE61|G,ICE70|G,ICE71|G,ICE72|G,ICE75|G,Ped-0|G
AT1G56070	20968976-20970237	20970000	G	SNP_EI	ICE134|C,ICE49|C,ICE50|C,ICE60|C,ICE61|C,ICE70|C,ICE75|C,Ped-0|C
AT1G56070	20968976-20970237	20970081	C	SNP_EI	Don-0|T,ICE138|T,ICE181|T,ICE71|T,ICE72|T
AT1G56070	20968976-20970237	20970102	G	SNP_EI	Don-0|A,ICE134|A,ICE138|A,ICE181|A,ICE49|A,ICE50|A,ICE60|A,ICE61|A,ICE70|A,ICE71|A,ICE72|A,ICE75|A,Ped-0|A
AT1G56070	20968976-20970237	20970145	T	SNP_EI	Ler-1|A
AT1G56070	20968976-20970237	20970174	C	SNP_EI	Don-0|T,ICE138|T,ICE181|T,ICE71|T,ICE72|T
AT1G56070	20970434-20970660	20970468	A	SNP_EI	Don-0|G,ICE134|G,ICE138|G,ICE181|G,ICE49|G,ICE50|G,ICE60|G,ICE61|G,ICE70|G,ICE71|G,ICE72|G,ICE75|G,Ped-0|G
AT1G56070	20970434-20970660	20970486	C	SNP_EI	Don-0|T,ICE134|T,ICE138|T,ICE181|T,ICE49|T,ICE50|T,ICE60|T,ICE61|T,ICE70|T,ICE71|T,ICE72|T,ICE75|T,Ped-0|T
AT1G56070	20970434-20970660	20970489	G	SNP_EI	Agu-1|A,Bak-2|A,Bak-7|A,Cdm-0|A,Del-10|A,Dog-4|A,Ey15-2|A,Fei-0|A,HKT2.4|A,ICE102|A,ICE104|A,ICE106|A,ICE107|A,ICE111|A,ICE112|A,ICE119|A,ICE120|A,ICE127|A,ICE130|A,ICE150|A,ICE152|A,ICE153|A,ICE163|A,ICE169|A,ICE173|A,ICE1|A,ICE216|A,ICE21|A,ICE226|A,ICE228|A,ICE33|A,ICE36|A,ICE63|A,ICE73|A,ICE7|A,ICE91|A,ICE92|A,ICE93|A,ICE97|A,ICE98|A,Kastel-1|A,Koch-1|A,Lag2.2|A,Leo-1|A,Nemrut-1|A,Mer-6|A,Pra…
AT1G56070	20970434-20970660	20970528	A	SNP_EI	ICE93|G
AT1G56070	20970434-20970660	20970558	A	SNP_EI	Don-0|G,ICE134|G,ICE138|G,ICE181|G,ICE49|G,ICE50|G,ICE60|G,ICE61|G,ICE70|G,ICE71|G,ICE72|G,ICE75|G,Ped-0|G
AT1G56070	20970434-20970660	20970599	T	SNP_EI	Ler-1|C
AT1G56070	20970434-20970660	20970645	A	SNP_EI	ICE112|G
AT1G57560	21317407-21317525	21317401	C	SNP_EI	Ey15-2|T,ICE212|T,ICE213|T,ICE226|T,ICE228|T
AT1G57560	21317407-21317525	21317432	G	SNP_EI	ICE50|C
AT1G57560	21317407-21317525	21317479	G	SNP_EI	Agu-1|C,Bak-2|C,Bak-7|C,Cdm-0|C,Del-10|C,Dog-4|C,Don-0|C,Ey15-2|C,Fei-0|C,HKT2.4|C,ICE102|C,ICE104|C,ICE106|C,ICE107|C,ICE111|C,ICE112|C,ICE119|C,ICE120|C,ICE127|C,ICE130|C,ICE134|C,ICE138|C,ICE150|C,ICE152|C,ICE153|C,ICE163|C,ICE169|C,ICE173|C,ICE181|C,ICE1|C,ICE212|C,ICE213|C,ICE216|C,ICE21|C,ICE226|C,ICE228|C,ICE29|C,ICE33|C,ICE36|C,ICE49|C,ICE50|C,ICE60|C,ICE61|C,ICE63|C,ICE70|C,ICE71|C,ICE73…
AT1G57560	21317407-21317525	21317489	A	SNP_EI	Agu-1|C,Bak-2|C,Bak-7|C,Cdm-0|C,Del-10|C,Dog-4|C,Don-0|C,Ey15-2|C,Fei-0|C,HKT2.4|C,ICE102|C,ICE104|C,ICE106|C,ICE107|C,ICE111|C,ICE112|C,ICE119|C,ICE120|C,ICE127|C,ICE130|C,ICE134|C,ICE138|C,ICE150|C,ICE152|C,ICE153|C,ICE163|C,ICE169|C,ICE173|C,ICE1|C,ICE212|C,ICE213|C,ICE216|C,ICE21|C,ICE226|C,ICE228|C,ICE29|C,ICE33|C,ICE36|C,ICE49|C,ICE50|C,ICE60|C,ICE61|C,ICE63|C,ICE70|C,ICE71|C,ICE75|C,ICE79|…
AT1G57560	21317407-21317525	21317504	G	SNP_EI	Agu-1|T,Cdm-0|T,Del-10|T,Dog-4|T,Don-0|T,Ey15-2|T,Fei-0|T,HKT2.4|T,ICE102|T,ICE104|T,ICE106|T,ICE107|T,ICE111|T,ICE112|T,ICE119|T,ICE120|T,ICE127|T,ICE130|T,ICE150|T,ICE152|T,ICE153|T,ICE163|T,ICE169|T,ICE173|T,ICE1|T,ICE212|T,ICE213|T,ICE216|T,ICE21|T,ICE226|T,ICE228|T,ICE29|T,ICE33|T,ICE36|T,ICE49|T,ICE50|T,ICE60|T,ICE61|T,ICE63|T,ICE70|T,ICE71|T,ICE73|T,ICE79|T,ICE7|T,ICE91|T,ICE92|T,ICE93|T,I…
AT1G57560	21317407-21317525	21317505	C	SNP_EI	Bak-7|T
AT1G57560	21317407-21317525	21317506	C	SNP_EI	ICE97|T
AT1G57560	21317407-21317525	21317508	A	SNP_EI	Agu-1|T,Cdm-0|T,Del-10|T,Dog-4|T,Don-0|T,Ey15-2|T,Fei-0|T,HKT2.4|T,ICE102|T,ICE104|T,ICE106|T,ICE107|T,ICE111|T,ICE112|T,ICE119|T,ICE120|T,ICE127|T,ICE130|T,ICE150|T,ICE152|T,ICE153|T,ICE163|T,ICE169|T,ICE173|T,ICE1|T,ICE212|T,ICE213|T,ICE216|T,ICE21|T,ICE226|T,ICE228|T,ICE29|T,ICE33|T,ICE36|T,ICE49|T,ICE50|T,ICE60|T,ICE61|T,ICE63|T,ICE70|T,ICE71|T,ICE79|T,ICE7|T,ICE91|T,ICE92|T,ICE93|T,ICE97|T,I…
AT1G57560	21317407-21317525	21317509	G	SNP_EI	ICE134|C,ICE138|C
AT1G57560	21317407-21317525	21317516	G	SPLICE_SIGNAL_SNP	ICE50|A
AT1G57560	21317407-21317525	21317527	A	SPLICE_SIGNAL_SNP	Agu-1|G,Cdm-0|G,Del-10|G,Dog-4|G,Don-0|G,Ey15-2|G,Fei-0|G,HKT2.4|G,ICE102|G,ICE104|G,ICE106|G,ICE107|G,ICE111|G,ICE112|G,ICE119|G,ICE120|G,ICE127|G,ICE130|G,ICE150|G,ICE152|G,ICE153|G,ICE163|G,ICE169|G,ICE173|G,ICE1|G,ICE212|G,ICE213|G,ICE216|G,ICE21|G,ICE226|G,ICE228|G,ICE29|G,ICE33|G,ICE36|G,ICE49|G,ICE50|G,ICE60|G,ICE61|G,ICE63|G,ICE70|G,ICE71|G,ICE79|G,ICE7|G,ICE91|G,ICE92|G,ICE93|G,ICE97|G,I…
AT1G57560	21317407-21317525	21317528	G	SNP_EI	Agu-1|C,Cdm-0|C,Del-10|C,Dog-4|C,Don-0|C,Ey15-2|C,Fei-0|C,HKT2.4|C,ICE102|C,ICE104|C,ICE106|C,ICE107|C,ICE111|C,ICE112|C,ICE119|C,ICE120|C,ICE127|C,ICE130|C,ICE150|C,ICE152|C,ICE153|C,ICE163|C,ICE169|C,ICE173|C,ICE1|C,ICE212|C,ICE213|C,ICE216|C,ICE21|C,ICE226|C,ICE228|C,ICE29|C,ICE33|C,ICE36|C,ICE49|C,ICE50|C,ICE60|C,ICE61|C,ICE63|C,ICE70|C,ICE71|C,ICE79|C,ICE7|C,ICE91|C,ICE92|C,ICE93|C,ICE97|C,I…
AT1G57720	21379170-21379264	21379194	C	SNP_EI	HKT2.4|T,ICE181|T,ICE21|T,Nie1-2|T,TueSB30-3|T,Ler-0|T
AT1G57720	21379263-21379381	21379310	C	SNP_EI	Dog-4|G
AT1G57720	21379263-21379381	21379374	C	SPLICE_SIGNAL_SNP	Bak-7|T,Fei-0|T,ICE102|T,ICE111|T,ICE212|T,ICE213|T,ICE226|T,ICE228|T,ICE29|T,ICE36|T,ICE60|T,ICE61|T,ICE70|T,ICE75|T,ICE79|T,ICE91|T,Lag2.2|T,Nemrut-1|T,Star-8|T,TueV13|T
AT1G57750	21384670-21385022	21384677	G	SPLICE_SIGNAL_SNP	Bak-2|T,Bak-7|T,Cdm-0|T,Del-10|T,Dog-4|T,Don-0|T,Ey15-2|T,Fei-0|T,HKT2.4|T,ICE102|T,ICE104|T,ICE106|T,ICE107|T,ICE111|T,ICE112|T,ICE119|T,ICE120|T,ICE127|T,ICE130|T,ICE134|T,ICE138|T,ICE150|T,ICE152|T,ICE153|T,ICE163|T,ICE181|T,ICE1|T,ICE212|T,ICE213|T,ICE216|T,ICE21|T,ICE226|T,ICE228|T,ICE29|T,ICE33|T,ICE36|T,ICE49|T,ICE60|T,ICE61|T,ICE63|T,ICE70|T,ICE71|T,ICE72|T,ICE73|T,ICE75|T,ICE79|T,ICE91|T…
AT1G57750	21384670-21385022	21384678	C	SPLICE_SIGNAL_SNP	ICE120|A,Vash-1|A
AT1G57750	21384670-21385022	21384801	A	SNP_EI	Bak-2|C,Bak-7|C,Cdm-0|C,Del-10|C,Dog-4|C,Don-0|C,Ey15-2|C,Fei-0|C,HKT2.4|C,ICE102|C,ICE104|C,ICE106|C,ICE107|C,ICE111|C,ICE112|C,ICE119|C,ICE120|C,ICE127|C,ICE130|C,ICE134|C,ICE138|C,ICE150|C,ICE152|C,ICE153|C,ICE163|C,ICE181|C,ICE1|C,ICE212|C,ICE213|C,ICE216|C,ICE21|C,ICE226|C,ICE228|C,ICE29|C,ICE33|C,ICE36|C,ICE49|C,ICE60|C,ICE61|C,ICE63|C,ICE70|C,ICE71|C,ICE72|C,ICE73|C,ICE75|C,ICE79|C,ICE91|C…
AT1G57750	21384670-21385022	21384820	A	SNP_EI	Ler-1|G
AT1G57750	21384670-21385022	21384823	C	SNP_EI	Bak-2|G,Bak-7|G,Cdm-0|G,Del-10|G,Dog-4|G,Don-0|G,Ey15-2|G,Fei-0|G,HKT2.4|G,ICE102|G,ICE104|G,ICE106|G,ICE107|G,ICE111|G,ICE112|G,ICE119|G,ICE120|G,ICE127|G,ICE130|G,ICE134|G,ICE138|G,ICE150|G,ICE152|G,ICE153|G,ICE163|G,ICE181|G,ICE1|G,ICE212|G,ICE213|G,ICE216|G,ICE21|G,ICE226|G,ICE228|G,ICE29|G,ICE33|G,ICE36|G,ICE49|G,ICE60|G,ICE61|G,ICE63|G,ICE70|G,ICE71|G,ICE72|G,ICE73|G,ICE75|G,ICE79|G,ICE91|G…
AT1G57750	21384670-21385022	21384825	C	SNP_EI	Bak-7|A,Don-0|A,Fei-0|A,ICE102|A,ICE104|A,ICE106|A,ICE107|A,ICE111|A,ICE112|A,ICE119|A,ICE150|A,ICE152|A,ICE153|A,ICE212|A,ICE213|A,ICE216|A,ICE226|A,ICE228|A,ICE29|A,ICE36|A,ICE49|A,ICE60|A,ICE61|A,ICE63|A,ICE75|A,ICE91|A,ICE92|A,ICE93|A,ICE97|A,ICE98|A,Istisu-1|A,Lag2.2|A,Nemrut-1|A,Nie1-2|A,Rue3-1-31|A,Sha|A,Star-8|A,TueSB30-3|A,TueV13|A,Vie-0|A
AT1G57750	21384670-21385022	21384866	A	SNP_EI	ICE134|C,ICE138|C
AT1G57750	21384670-21385022	21384873	C	SNP_EI	ICE134|A,ICE138|A
AT1G57750	21384670-21385022	21384877	T	SNP_EI	Bak-7|G,Don-0|G,Fei-0|G,ICE102|G,ICE104|G,ICE106|G,ICE107|G,ICE111|G,ICE112|G,ICE119|G,ICE134|G,ICE138|G,ICE150|G,ICE152|G,ICE153|G,ICE212|G,ICE213|G,ICE216|G,ICE226|G,ICE228|G,ICE29|G,ICE36|G,ICE49|G,ICE60|G,ICE61|G,ICE63|G,ICE70|G,ICE75|G,ICE79|G,ICE91|G,ICE92|G,ICE93|G,ICE97|G,ICE98|G,Istisu-1|G,Lag2.2|G,Nemrut-1|G,Nie1-2|G,Rue3-1-31|G,Sha|G,Star-8|G,TueSB30-3|G,Vie-0|G
AT1G57750	21384670-21385022	21384881	C	SNP_EI	Istisu-1|T
AT1G57750	21384670-21385022	21384882	G	SNP_EI	Tuescha9|T
AT1G57750	21384670-21385022	21384899	T	SNP_EI	Bak-2|C,Cdm-0|C,Del-10|C,Dog-4|C,Ey15-2|C,HKT2.4|C,ICE120|C,ICE127|C,ICE130|C,ICE163|C,ICE181|C,ICE1|C,ICE21|C,ICE33|C,ICE71|C,ICE72|C,ICE73|C,Kastel-1|C,Koch-1|C,Leo-1|C,Lerik1-3|C,Mer-6|C,Ped-0|C,TueWa1-2|C,Vash-1|C,WalhaesB4|C,Xan-1|C,Yeg-1|C
AT1G57750	21384670-21385022	21384904	C	SNP_EI	Bak-7|T,Don-0|T,Fei-0|T,ICE102|T,ICE104|T,ICE106|T,ICE107|T,ICE111|T,ICE112|T,ICE119|T,ICE134|T,ICE138|T,ICE150|T,ICE152|T,ICE153|T,ICE212|T,ICE213|T,ICE216|T,ICE226|T,ICE228|T,ICE29|T,ICE36|T,ICE49|T,ICE60|T,ICE61|T,ICE63|T,ICE70|T,ICE75|T,ICE79|T,ICE91|T,ICE92|T,ICE93|T,ICE97|T,ICE98|T,Istisu-1|T,Lag2.2|T,Nemrut-1|T,Nie1-2|T,Rue3-1-31|T,Sha|T,Star-8|T,TueSB30-3|T,TueV13|T,Vie-0|T
AT1G57750	21384670-21385022	21384918	C	SNP_EI	Bak-7|T,Don-0|T,Fei-0|T,ICE102|T,ICE104|T,ICE106|T,ICE107|T,ICE111|T,ICE112|T,ICE119|T,ICE134|T,ICE138|T,ICE150|T,ICE152|T,ICE153|T,ICE212|T,ICE213|T,ICE216|T,ICE226|T,ICE228|T,ICE29|T,ICE36|T,ICE49|T,ICE60|T,ICE61|T,ICE63|T,ICE70|T,ICE75|T,ICE79|T,ICE91|T,ICE92|T,ICE93|T,ICE97|T,ICE98|T,Istisu-1|T,Lag2.2|T,Nemrut-1|T,Nie1-2|T,Rue3-1-31|T,Sha|T,Star-8|T,TueSB30-3|T,TueV13|T,Vie-0|T
AT1G58100	21512981-21513045	21512968	T	SNP_EI	Ler-1|C
AT1G58100	21512981-21513045	21512971	C	SNP_EI	Cdm-0|T,ICE104|T,ICE107|T,ICE111|T,ICE134|T,ICE138|T,ICE150|T,ICE152|T,ICE153|T,ICE181|T,ICE212|T,ICE213|T,ICE21|T,ICE226|T,ICE228|T,ICE49|T,ICE63|T,ICE71|T,Koch-1|T,Ped-0|T,Pra-6|T,Sha|T,WalhaesB4|T,Xan-1|T,Yeg-1|T
AT1G58100	21512981-21513045	21512983	A	SPLICE_SITE_SNP	Ler-1|G
AT1G58100	21512981-21513045	21512993	G	SNP_EI	Cdm-0|C,ICE104|C,ICE107|C,ICE111|C,ICE134|C,ICE138|C,ICE150|C,ICE152|C,ICE153|C,ICE181|C,ICE212|C,ICE213|C,ICE21|C,ICE226|C,ICE228|C,ICE36|C,ICE49|C,ICE63|C,ICE71|C,Koch-1|C,Ped-0|C,Pra-6|C,Sha|C,WalhaesB4|C,Xan-1|C,Yeg-1|C
AT1G58100	21512981-21513045	21512995	T	SNP_EI	Cdm-0|A,ICE104|A,ICE107|A,ICE111|A,ICE134|A,ICE138|A,ICE150|A,ICE152|A,ICE153|A,ICE181|A,ICE212|A,ICE213|A,ICE21|A,ICE226|A,ICE228|A,ICE49|A,ICE63|A,ICE71|A,Koch-1|A,Ped-0|A,Pra-6|A,Sha|A,WalhaesB4|A,Xan-1|A,Yeg-1|A
AT1G58100	21512981-21513045	21512998	A	SNP_EI	Ler-1|G
AT1G58100	21512981-21513045	21513010	G	SNP_EI	ICE104|A,ICE107|A,ICE134|A,ICE138|A,ICE150|A,ICE152|A,ICE153|A,ICE49|A,ICE71|A,Sha|A,WalhaesB4|A,Yeg-1|A
AT1G58100	21512981-21513045	21513034	A	SNP_EI	Istisu-1|G
AT1G58100	21512981-21513045	21513051	C	SNP_EI	Agu-1|T,Bak-2|T,Bak-7|T,Cdm-0|T,Del-10|T,Dog-4|T,Don-0|T,Ey15-2|T,Fei-0|T,HKT2.4|T,ICE102|T,ICE104|T,ICE106|T,ICE107|T,ICE111|T,ICE112|T,ICE119|T,ICE120|T,ICE127|T,ICE130|T,ICE134|T,ICE138|T,ICE150|T,ICE152|T,ICE153|T,ICE163|T,ICE169|T,ICE173|T,ICE181|T,ICE1|T,ICE212|T,ICE213|T,ICE216|T,ICE21|T,ICE226|T,ICE228|T,ICE29|T,ICE33|T,ICE36|T,ICE49|T,ICE50|T,ICE60|T,ICE61|T,ICE63|T,ICE70|T,ICE71|T,ICE72…
AT1G58180	21538029-21538132	21538043	T	SNP_EI	TueWa1-2|C
AT1G58180	21538029-21538132	21538048	A	SNP_EI	Mer-6|T
AT1G58180	21538029-21538132	21538054	T	SNP_EI	ICE29|C,Ped-0|C,Pra-6|C
AT1G58180	21538029-21538132	21538066	T	SNP_EI	Bak-7|G,Nemrut-1|G
AT1G58180	21538029-21538132	21538071	C	SNP_EI	Mer-6|T
AT1G58180	21538029-21538132	21538089	C	SNP_EI	ICE111|T
AT1G58180	21538029-21538132	21538128	G	BP_SNP	Ler-1|A
AT1G58180	21538029-21538132	21538133	T	SPLICE_SIGNAL_SNP	Cdm-0|C,ICE29|C,Ped-0|C,Pra-6|C
AT1G58180	21538029-21538132	21538135	A	SNP_EI	Ler-1|C
AT1G60170	22194295-22194376	22194324	T	SNP_EI	Xan-1|A
AT1G60170	22194295-22194376	22194357	T	SNP_EI	ICE119|C,ICE7|C,ICE93|C,TueV13|C,Yeg-1|C
AT1G60170	22194295-22194376	22194369	A	SPLICE_SIGNAL_SNP	Bak-7|G
AT1G60170	22194295-22194376	22194372	G	SPLICE_SIGNAL_SNP	Lag2.2|T
AT1G60390	22248388-22249357	22248401	T	SNP_EI	Ler-1|A
AT1G60390	22248388-22249357	22248404	C	SNP_EI	Ler-1|G
AT1G60390	22248388-22249357	22248406	G	SNP_EI	Agu-1|A,Ey15-2|A,ICE106|A,ICE119|A,ICE130|A,ICE150|A,ICE152|A,ICE153|A,ICE29|A,ICE33|A,ICE60|A,ICE61|A,ICE71|A,ICE72|A,ICE73|A,Lerik1-3|A,Ped-0|A,Sha|A,Vash-1|A,Xan-1|A
AT1G60390	22248388-22249357	22248415	C	SNP_EI	Ler-1|T
AT1G60390	22248388-22249357	22248426	C	SNP_EI	Ler-1|A
AT1G60390	22248388-22249357	22248439	G	SNP_EI	Agu-1|A,Bak-2|A,Bak-7|A,Ey15-2|A,ICE106|A,ICE119|A,ICE130|A,ICE134|A,ICE150|A,ICE152|A,ICE153|A,ICE29|A,ICE33|A,ICE60|A,ICE61|A,ICE71|A,ICE72|A,ICE73|A,Kastel-1|A,Koch-1|A,Lerik1-3|A,Mer-6|A,Ped-0|A,Sha|A,Vash-1|A,Xan-1|A,Yeg-1|A
AT1G60390	22248388-22249357	22248442	A	SNP_EI	Agu-1|G,Bak-2|G,Bak-7|G,Ey15-2|G,ICE106|G,ICE119|G,ICE130|G,ICE134|G,ICE150|G,ICE152|G,ICE153|G,ICE29|G,ICE33|G,ICE60|G,ICE61|G,ICE71|G,ICE72|G,ICE73|G,Kastel-1|G,Koch-1|G,Lerik1-3|G,Mer-6|G,Ped-0|G,Sha|G,Vash-1|G,Xan-1|G,Yeg-1|G
AT1G60390	22248388-22249357	22248487	G	SNP_EI	Cdm-0|T
AT1G60390	22248388-22249357	22248517	A	SNP_EI	Agu-1|G,Ey15-2|G,ICE106|G,ICE119|G,ICE130|G,ICE150|G,ICE152|G,ICE153|G,ICE29|G,ICE33|G,ICE60|G,ICE61|G,ICE71|G,ICE72|G,ICE73|G,Kastel-1|G,Koch-1|G,Lerik1-3|G,Mer-6|G,Ped-0|G,Sha|G,Vash-1|G,Xan-1|G
AT1G60390	22248388-22249357	22248532	T	SNP_EI	Agu-1|G,Ey15-2|G,ICE119|G,ICE130|G,ICE150|G,ICE152|G,ICE153|G,ICE29|G,ICE33|G,ICE60|G,ICE61|G,ICE71|G,ICE72|G,ICE73|G,Kastel-1|G,Koch-1|G,Mer-6|G,Ped-0|G,Sha|G,Vash-1|G
AT1G60390	22248388-22249357	22248537	A	SNP_EI	Ler-1|G
AT1G60390	22248388-22249357	22248538	G	SNP_EI	Ey15-2|A,ICE119|A,ICE33|A,ICE73|A,Vash-1|A
AT1G60390	22248388-22249357	22248568	G	SNP_EI	ICE106|A
AT1G60390	22248388-22249357	22248607	C	SNP_EI	Bak-2|G,Bak-7|G,ICE134|G,Yeg-1|G
AT1G60390	22248388-22249357	22248661	G	SNP_EI	Lag2.2|A
AT1G60390	22248388-22249357	22248680	A	SNP_EI	Lag2.2|T
AT1G60390	22248388-22249357	22248774	A	SNP_EI	Agu-1|C,Bak-2|C,Bak-7|C,Cdm-0|C,Don-0|C,Ey15-2|C,HKT2.4|C,ICE102|C,ICE104|C,ICE106|C,ICE107|C,ICE111|C,ICE119|C,ICE127|C,ICE130|C,ICE134|C,ICE138|C,ICE150|C,ICE152|C,ICE153|C,ICE1|C,ICE212|C,ICE213|C,ICE21|C,ICE226|C,ICE228|C,ICE29|C,ICE33|C,ICE36|C,ICE60|C,ICE61|C,ICE63|C,ICE70|C,ICE71|C,ICE72|C,ICE73|C,ICE75|C,ICE7|C,ICE91|C,ICE92|C,ICE93|C,Istisu-1|C,Kastel-1|C,Koch-1|C,Lag2.2|C,Leo-1|C,Lerik1…
AT1G60390	22248388-22249357	22248803	G	SNP_EI	ICE93|A
AT1G60390	22248388-22249357	22248814	T	SNP_EI	Cdm-0|A,Don-0|A,Ey15-2|A,HKT2.4|A,ICE102|A,ICE107|A,ICE111|A,ICE119|A,ICE127|A,ICE138|A,ICE1|A,ICE212|A,ICE213|A,ICE21|A,ICE226|A,ICE228|A,ICE33|A,ICE36|A,ICE63|A,ICE70|A,ICE75|A,ICE7|A,ICE91|A,ICE92|A,ICE93|A,Lag2.2|A,Leo-1|A,Pra-6|A,Vash-1|A,Ler-0|A
AT1G60390	22248388-22249357	22248881	A	SNP_EI	Ler-1|T
AT1G60390	22248388-22249357	22248883	G	SNP_EI	Bak-7|C,Cdm-0|A,Don-0|A,Ey15-2|A,HKT2.4|A,ICE102|A,ICE107|A,ICE111|A,ICE119|A,ICE138|A,ICE1|A,ICE212|A,ICE213|A,ICE21|A,ICE226|A,ICE228|A,ICE33|A,ICE63|A,ICE70|A,ICE75|A,ICE7|A,ICE91|A,ICE92|A,ICE93|A,Lag2.2|A,Leo-1|A,Pra-6|A,Vash-1|A,Ler-0|A
AT1G60390	22248388-22249357	22248895	G	SNP_EI	ICE119|C
AT1G60390	22248388-22249357	22248898	G	SNP_EI	ICE130|A,ICE150|A,ICE152|A,ICE153|A,Sha|A
AT1G60390	22248388-22249357	22248909	C	SNP_EI	Ler-1|T
AT1G60390	22248388-22249357	22248925	A	SNP_EI	Agu-1|T,ICE104|T,ICE106|T,ICE127|T,ICE130|T,ICE150|T,ICE152|T,ICE153|T,ICE29|T,ICE60|T,ICE61|T,ICE71|T,ICE72|T,ICE73|T,Istisu-1|T,Kastel-1|T,Koch-1|T,Lerik1-3|T,Mer-6|T,Ped-0|T,Sha|T,Xan-1|T
AT1G60390	22248388-22249357	22248943	A	SNP_EI	Agu-1|T,ICE104|T,ICE106|T,ICE127|T,ICE130|T,ICE150|T,ICE152|T,ICE153|T,ICE29|T,ICE60|T,ICE61|T,ICE71|T,ICE72|T,ICE73|T,Istisu-1|T,Kastel-1|T,Koch-1|T,Lerik1-3|T,Mer-6|T,Ped-0|T,Sha|T,Xan-1|T
AT1G60390	22248388-22249357	22248946	T	SNP_EI	Agu-1|G,ICE104|G,ICE106|G,ICE127|G,ICE130|G,ICE150|G,ICE152|G,ICE153|G,ICE29|G,ICE60|G,ICE61|G,ICE71|G,ICE72|G,ICE73|G,Istisu-1|G,Kastel-1|G,Koch-1|G,Lerik1-3|G,Mer-6|G,Ped-0|G,Sha|G,Xan-1|G
AT1G60390	22248388-22249357	22248948	C	SNP_EI	ICE130|T,ICE150|T,ICE152|T,ICE153|T,Sha|T
AT1G60390	22248388-22249357	22248971	G	SNP_EI	Agu-1|A,Cdm-0|A,HKT2.4|A,ICE104|A,ICE106|A,ICE107|A,ICE111|A,ICE127|A,ICE130|A,ICE138|A,ICE150|A,ICE152|A,ICE153|A,ICE1|A,ICE212|A,ICE213|A,ICE226|A,ICE228|A,ICE29|A,ICE36|A,ICE60|A,ICE61|A,ICE63|A,ICE70|A,ICE71|A,ICE72|A,ICE73|A,ICE75|A,ICE92|A,ICE93|A,Istisu-1|A,Kastel-1|A,Koch-1|A,Lag2.2|A,Leo-1|A,Lerik1-3|A,Mer-6|A,Ped-0|A,Sha|A,Xan-1|A
AT1G60390	22248388-22249357	22248973	A	SNP_EI	Yeg-1|G
AT1G60390	22248388-22249357	22249002	G	SNP_EI	Ey15-2|T,ICE102|T,ICE119|T,ICE21|T,ICE33|T,ICE91|T,Pra-6|T,Vash-1|T
AT1G60390	22248388-22249357	22249015	C	SNP_EI	Ler-1|T
AT1G60390	22248388-22249357	22249018	T	SNP_EI	Agu-1|C,Cdm-0|C,HKT2.4|C,ICE104|C,ICE106|C,ICE107|C,ICE111|C,ICE127|C,ICE130|C,ICE138|C,ICE150|C,ICE152|C,ICE153|C,ICE1|C,ICE212|C,ICE213|C,ICE226|C,ICE228|C,ICE29|C,ICE36|C,ICE60|C,ICE61|C,ICE63|C,ICE70|C,ICE71|C,ICE72|C,ICE73|C,ICE75|C,ICE92|C,ICE93|C,Istisu-1|C,Kastel-1|C,Koch-1|C,Lag2.2|C,Leo-1|C,Lerik1-3|C,Mer-6|C,Sha|C,Xan-1|C
AT1G60390	22248388-22249357	22249036	G	SNP_EI	Don-0|A,Ey15-2|A,ICE102|A,ICE119|A,ICE21|A,ICE33|A,ICE7|A,ICE91|A,Pra-6|A,Vash-1|A,Ler-0|A
AT1G60390	22248388-22249357	22249085	G	SNP_EI	ICE70|A
AT1G60390	22248388-22249357	22249102	G	SNP_EI	Agu-1|A,Cdm-0|A,HKT2.4|A,ICE104|A,ICE106|A,ICE107|A,ICE111|A,ICE127|A,ICE130|A,ICE138|A,ICE150|A,ICE152|A,ICE153|A,ICE1|A,ICE212|A,ICE213|A,ICE226|A,ICE228|A,ICE29|A,ICE36|A,ICE60|A,ICE61|A,ICE63|A,ICE70|A,ICE71|A,ICE72|A,ICE73|A,ICE75|A,ICE92|A,ICE93|A,Istisu-1|A,Kastel-1|A,Koch-1|A,Lag2.2|A,Leo-1|A,Lerik1-3|A,Mer-6|A,Ped-0|A,Sha|A,Xan-1|A
AT1G60390	22248388-22249357	22249110	C	SNP_EI	Bak-2|T,Bak-7|T
AT1G60390	22248388-22249357	22249137	C	SNP_EI	Pra-6|T
AT1G60390	22248388-22249357	22249150	C	SNP_EI	Agu-1|T,Cdm-0|T,Don-0|T,HKT2.4|T,ICE104|T,ICE106|T,ICE107|T,ICE111|T,ICE127|T,ICE130|T,ICE138|T,ICE150|T,ICE152|T,ICE153|T,ICE1|T,ICE212|T,ICE213|T,ICE226|T,ICE228|T,ICE29|T,ICE36|T,ICE60|T,ICE61|T,ICE63|T,ICE70|T,ICE71|T,ICE72|T,ICE73|T,ICE75|T,ICE92|T,ICE93|T,Istisu-1|T,Kastel-1|T,Koch-1|T,Lag2.2|T,Leo-1|T,Lerik1-3|T,Mer-6|T,Ped-0|T,Sha|T,Xan-1|T
AT1G60390	22248388-22249357	22249151	A	SNP_EI	Vash-1|T
AT1G60390	22248388-22249357	22249161	C	SNP_EI	ICE212|G,ICE213|G
AT1G60390	22248388-22249357	22249168	C	SNP_EI	Leo-1|T
AT1G60390	22248388-22249357	22249236	A	SNP_EI	Ey15-2|T,ICE102|T,ICE104|T,ICE119|T,ICE21|T,ICE33|T,ICE7|T,ICE91|T,Pra-6|T,Vash-1|T
AT1G60390	22248388-22249357	22249255	C	SNP_EI	ICE106|T,Lerik1-3|T,Xan-1|T
AT1G60390	22248388-22249357	22249275	G	SNP_EI	Agu-1|A,Cdm-0|A,Don-0|A,HKT2.4|A,ICE106|A,ICE107|A,ICE111|A,ICE127|A,ICE130|A,ICE138|A,ICE150|A,ICE152|A,ICE153|A,ICE1|A,ICE212|A,ICE213|A,ICE226|A,ICE228|A,ICE29|A,ICE36|A,ICE60|A,ICE61|A,ICE63|A,ICE70|A,ICE71|A,ICE72|A,ICE73|A,ICE75|A,ICE92|A,ICE93|A,Istisu-1|A,Kastel-1|A,Koch-1|A,Lag2.2|A,Leo-1|A,Lerik1-3|A,Mer-6|A,Ped-0|A,Sha|A,Xan-1|A
AT1G60390	22248388-22249357	22249294	G	SNP_EI	Istisu-1|T
AT1G60390	22248388-22249357	22249296	A	SNP_EI	Ler-1|G
AT1G60390	22248388-22249357	22249301	G	SNP_EI	Ey15-2|T,ICE102|T,ICE104|T,ICE119|T,ICE21|T,ICE33|T,ICE7|T,ICE91|T,Pra-6|T,Vash-1|T
AT1G60390	22248388-22249357	22249327	G	SNP_EI	Ler-0|A
AT1G60390	22248388-22249357	22249340	G	SNP_EI	Ler-1|C
AT1G60390	22248388-22249357	22249347	T	SPLICE_SIGNAL_SNP	Don-0|A
AT1G60390	22248388-22249357	22249352	G	SPLICE_SIGNAL_SNP	Agu-1|T,Cdm-0|T,Don-0|T,HKT2.4|T,ICE106|T,ICE107|T,ICE111|T,ICE127|T,ICE130|T,ICE138|T,ICE150|T,ICE152|T,ICE153|T,ICE1|T,ICE212|T,ICE213|T,ICE226|T,ICE228|T,ICE29|T,ICE36|T,ICE60|T,ICE61|T,ICE63|T,ICE70|T,ICE71|T,ICE72|T,ICE73|T,ICE75|T,ICE92|T,ICE93|T,Istisu-1|T,Kastel-1|T,Koch-1|T,Lag2.2|T,Leo-1|T,Lerik1-3|T,Mer-6|T,Ped-0|T,Sha|T,Xan-1|T
AT1G60390	22248388-22249357	22249362	G	SNP_EI	Lerik1-3|T,Xan-1|T
AT1G60560	22309321-22309401	22309322	C	SPLICE_SITE_SNP	Don-0|T,Ey15-2|T,ICE120|T,ICE134|T,ICE181|T,ICE1|T,ICE49|T,ICE60|T,ICE61|T,ICE71|T,ICE72|T,ICE75|T,ICE79|T,ICE98|T,Nemrut-1|T,Qui-0|T,TueWa1-2|T,Vie-0|T,WalhaesB4|T
AT1G60560	22309321-22309401	22309373	A	SNP_EI	Don-0|T,Ey15-2|T,ICE120|T,ICE134|T,ICE181|T,ICE1|T,ICE216|T,ICE49|T,ICE50|T,ICE60|T,ICE61|T,ICE70|T,ICE71|T,ICE72|T,ICE75|T,ICE79|T,ICE98|T,Nemrut-1|T,Mer-6|T,Qui-0|T,TueV13|T,Vie-0|T,WalhaesB4|T
AT1G60890	22415750-22415958	22415774	A	SNP_EI	Agu-1|G,Bak-2|G,Bak-7|G,Del-10|G,Dog-4|G,Don-0|G,Ey15-2|G,Fei-0|G,ICE102|G,ICE106|G,ICE111|G,ICE112|G,ICE119|G,ICE120|G,ICE138|G,ICE150|G,ICE152|G,ICE153|G,ICE169|G,ICE173|G,ICE1|G,ICE212|G,ICE213|G,ICE21|G,ICE29|G,ICE33|G,ICE36|G,ICE49|G,ICE50|G,ICE60|G,ICE63|G,ICE70|G,ICE71|G,ICE72|G,ICE75|G,ICE79|G,ICE91|G,ICE92|G,ICE97|G,ICE98|G,Istisu-1|G,Nemrut-1|G,Mer-6|G,Nie1-2|G,Pra-6|G,Qui-0|G,Rue3-1-31…
AT1G60890	22415750-22415958	22415777	A	SNP_EI	Agu-1|G,Bak-2|G,Bak-7|G,Del-10|G,Dog-4|G,Don-0|G,Ey15-2|G,Fei-0|G,ICE102|G,ICE106|G,ICE111|G,ICE112|G,ICE119|G,ICE120|G,ICE138|G,ICE150|G,ICE152|G,ICE153|G,ICE169|G,ICE173|G,ICE1|G,ICE212|G,ICE213|G,ICE21|G,ICE29|G,ICE33|G,ICE36|G,ICE49|G,ICE50|G,ICE60|G,ICE63|G,ICE70|G,ICE71|G,ICE72|G,ICE75|G,ICE79|G,ICE91|G,ICE92|G,ICE97|G,ICE98|G,Istisu-1|G,Nemrut-1|G,Mer-6|G,Nie1-2|G,Pra-6|G,Qui-0|G,Rue3-1-31…
AT1G60890	22415750-22415958	22415780	G	SNP_EI	Agu-1|A,Bak-2|A,Bak-7|A,Del-10|A,Dog-4|A,Don-0|A,Ey15-2|A,Fei-0|A,ICE102|A,ICE106|A,ICE111|A,ICE112|A,ICE119|A,ICE120|A,ICE138|A,ICE150|A,ICE152|A,ICE153|A,ICE169|A,ICE173|A,ICE1|A,ICE212|A,ICE213|A,ICE21|A,ICE29|A,ICE33|A,ICE36|A,ICE49|A,ICE50|A,ICE60|A,ICE63|A,ICE70|A,ICE71|A,ICE72|A,ICE75|A,ICE79|A,ICE91|A,ICE92|A,ICE97|A,ICE98|A,Istisu-1|A,Nemrut-1|A,Mer-6|A,Nie1-2|A,Pra-6|A,Qui-0|A,Rue3-1-31…
AT1G60890	22415750-22415958	22415828	T	SNP_EI	Agu-1|C,Bak-2|C,Bak-7|C,Del-10|C,Dog-4|C,Don-0|C,Ey15-2|C,Fei-0|C,ICE102|C,ICE106|C,ICE111|C,ICE112|C,ICE119|C,ICE120|C,ICE138|C,ICE150|C,ICE152|C,ICE153|C,ICE169|C,ICE173|C,ICE181|C,ICE1|C,ICE212|C,ICE213|C,ICE21|C,ICE226|C,ICE228|C,ICE29|C,ICE33|C,ICE36|C,ICE49|C,ICE50|C,ICE60|C,ICE63|C,ICE70|C,ICE71|C,ICE72|C,ICE75|C,ICE79|C,ICE7|C,ICE91|C,ICE92|C,ICE97|C,ICE98|C,Istisu-1|C,Leo-1|C,Nemrut-1|C,…
AT1G61170	22550072-22550161	22550057	G	SNP_EI	Ler-1|C
AT1G61170	22550072-22550161	22550062	A	SNP_EI	Ler-1|T
AT1G61170	22550072-22550161	22550063	G	SNP_EI	Lag2.2|A,Ler-1|T
AT1G61170	22550072-22550161	22550066	G	SNP_EI	Qui-0|A
AT1G61170	22550072-22550161	22550072	C	SPLICE_SIGNAL_SNP	Agu-1|G,Bak-2|G,Bak-7|G,Del-10|G,Dog-4|G,Don-0|G,Ey15-2|G,Fei-0|G,HKT2.4|G,ICE102|G,ICE104|G,ICE106|G,ICE107|G,ICE111|G,ICE112|G,ICE119|G,ICE120|G,ICE127|G,ICE130|G,ICE134|G,ICE138|G,ICE150|G,ICE152|G,ICE153|G,ICE163|G,ICE169|G,ICE173|G,ICE181|G,ICE1|G,ICE212|G,ICE213|G,ICE216|G,ICE21|G,ICE226|G,ICE228|G,ICE29|G,ICE33|G,ICE36|G,ICE49|G,ICE50|G,ICE60|G,ICE61|G,ICE63|G,ICE71|G,ICE72|G,ICE73|G,ICE75…
AT1G61170	22550072-22550161	22550083	G	SNP_EI	ICE70|A
AT1G61170	22550072-22550161	22550091	G	SNP_EI	ICE112|C
AT1G61170	22550072-22550161	22550097	C	SNP_EI	ICE226|T,ICE228|T,Ler-0|T
AT1G61170	22550072-22550161	22550107	T	SNP_EI	ICE93|C
AT1G61170	22550072-22550161	22550110	G	SNP_EI	ICE49|T,Mer-6|T
AT1G61170	22550072-22550161	22550127	A	SNP_EI	Agu-1|G,Bak-2|G,Bak-7|G,Del-10|G,Dog-4|G,Don-0|G,Ey15-2|G,Fei-0|G,HKT2.4|G,ICE102|G,ICE104|G,ICE106|G,ICE107|G,ICE111|G,ICE112|G,ICE119|G,ICE120|G,ICE127|G,ICE130|G,ICE134|G,ICE138|G,ICE150|G,ICE152|G,ICE153|G,ICE163|G,ICE169|G,ICE173|G,ICE181|G,ICE1|G,ICE212|G,ICE213|G,ICE216|G,ICE21|G,ICE226|G,ICE228|G,ICE29|G,ICE33|G,ICE36|G,ICE49|G,ICE50|G,ICE60|G,ICE61|G,ICE63|G,ICE71|G,ICE72|G,ICE73|G,ICE75…
AT1G61170	22550072-22550161	22550150	A	SNP_EI	ICE63|G
AT1G61170	22550072-22550161	22550164	T	SNP_EI	HKT2.4|A,ICE102|A,ICE150|A,ICE152|A,ICE153|A,ICE181|A,ICE1|A,ICE216|A,ICE60|A,ICE61|A,ICE7|A,ICE97|A,Sha|A,Star-8|A,TueV13|A,TueWa1-2|A,WalhaesB4|A,Xan-1|A
AT1G61190	22559261-22559337	22559309	C	SNP_EI	Bak-2|A,Don-0|G,Ey15-2|A,ICE104|A,ICE120|G,ICE130|A,ICE216|G,ICE36|A,ICE61|G,ICE79|G,ICE93|G,ICE97|A,ICE98|G,Istisu-1|A,Lerik1-3|G,Pra-6|G,Qui-0|G,Sha|G,WalhaesB4|G,Xan-1|A
AT1G61190	22559261-22559337	22559310	A	SNP_EI	ICE169|G,ICE173|G,ICE212|G,ICE213|G,ICE29|G
AT1G61190	22559261-22559337	22559311	T	SNP_EI	Don-0|A
AT1G61190	22559261-22559337	22559316	C	SNP_EI	Del-10|T,Don-0|A,ICE112|T,ICE119|T,ICE130|T,ICE163|T,ICE212|T,ICE213|T,ICE50|T,ICE73|T,Nemrut-1|T,Mer-6|T,Ped-0|T,Tuescha9|A,Vash-1|T
AT1G61190	22559261-22559337	22559319	A	SNP_EI	Don-0|C,Tuescha9|C
AT1G61190	22559261-22559337	22559321	T	SNP_EI	ICE212|A,ICE213|A
AT1G61190	22559261-22559337	22559324	A	SNP_EI	Bak-7|T
AT1G61640	22747441-22747527	22747441	T	SPLICE_SIGNAL_SNP	Ler-1|C
AT1G61640	22747441-22747527	22747464	T	SNP_EI	Ler-1|A
AT1G61640	22747441-22747527	22747465	C	SNP_EI	ICE150|T,ICE152|T,ICE153|T,Vie-0|T
AT1G61640	22747441-22747527	22747466	C	SNP_EI	Ler-1|G
AT1G61640	22747441-22747527	22747467	A	SNP_EI	Bak-2|T,Bak-7|T,Cdm-0|T,Del-10|T,Dog-4|T,HKT2.4|T,ICE102|T,ICE104|T,ICE107|T,ICE119|T,ICE120|T,ICE127|T,ICE138|T,ICE163|T,ICE226|T,ICE228|T,ICE36|T,ICE49|T,ICE50|T,ICE60|T,ICE63|T,ICE70|T,ICE72|T,ICE73|T,ICE79|T,ICE91|T,ICE92|T,ICE93|T,Istisu-1|T,Lag2.2|T,Leo-1|T,Nemrut-1|T,Nie1-2|T,Ped-0|T,Pra-6|T,Qui-0|T,Sha|T,Tuescha9|T,TueV13|T,Vash-1|T,WalhaesB4|T,Xan-1|T
AT1G61640	22747441-22747527	22747475	C	SNP_EI	Bak-2|T,Bak-7|T,Cdm-0|T,Del-10|T,Dog-4|T,HKT2.4|T,ICE102|T,ICE104|T,ICE107|T,ICE119|T,ICE120|T,ICE127|T,ICE138|T,ICE150|T,ICE152|T,ICE153|T,ICE163|T,ICE226|T,ICE228|T,ICE36|T,ICE49|T,ICE50|T,ICE60|T,ICE63|T,ICE70|T,ICE72|T,ICE73|T,ICE79|T,ICE91|T,ICE92|T,ICE93|T,Istisu-1|T,Lag2.2|T,Leo-1|T,Nemrut-1|T,Nie1-2|T,Ped-0|T,Pra-6|T,Qui-0|T,Sha|T,Tuescha9|T,TueV13|T,Vash-1|T,Vie-0|T,WalhaesB4|T,Xan-1|T
AT1G61640	22747441-22747527	22747476	A	SNP_EI	ICE63|G
AT1G61640	22747441-22747527	22747485	C	SNP_EI	ICE1|A,ICE212|A,ICE213|A,ICE29|A,Kastel-1|A
AT1G61640	22747441-22747527	22747486	G	SNP_EI	Dog-4|C,ICE72|C,Qui-0|C
AT1G61640	22747441-22747527	22747489	A	SNP_EI	ICE138|G,Vash-1|G
AT1G61640	22747441-22747527	22747498	A	SNP_EI	Bak-2|C,ICE104|C,ICE119|C,ICE36|C,ICE91|C,ICE92|C,ICE93|C,Ler-1|T
AT1G61640	22747441-22747527	22747499	A	SNP_EI	ICE79|G
AT1G61640	22747441-22747527	22747504	C	SNP_EI	ICE169|T,ICE173|T
AT1G61640	22747441-22747527	22747507	T	SNP_EI	Ler-1|C
AT1G61640	22747441-22747527	22747511	T	SNP_EI	Ler-1|A
AT1G61640	22747441-22747527	22747520	A	SPLICE_SIGNAL_SNP	Bak-2|G,Bak-7|G,Cdm-0|G,Del-10|G,Dog-4|G,HKT2.4|G,ICE102|G,ICE104|G,ICE107|G,ICE119|G,ICE120|G,ICE127|G,ICE138|G,ICE150|G,ICE152|G,ICE153|G,ICE163|G,ICE226|G,ICE228|G,ICE36|G,ICE49|G,ICE50|G,ICE60|G,ICE63|G,ICE70|G,ICE72|G,ICE73|G,ICE79|G,ICE91|G,ICE92|G,ICE93|G,Istisu-1|G,Lag2.2|G,Leo-1|G,Nemrut-1|G,Nie1-2|G,Ped-0|G,Pra-6|G,Qui-0|G,Sha|G,Tuescha9|G,TueV13|G,Vash-1|G,Vie-0|G,WalhaesB4|G,Xan-1|G
AT1G61640	22747441-22747527	22747521	C	BP_SNP	ICE102|T
AT1G61730	22794320-22794446	22794306	C	SNP_EI	Ler-1|A
AT1G61730	22794320-22794446	22794314	T	SNP_EI	ICE102|A,ICE106|A,ICE120|A,ICE163|A,ICE70|A,ICE97|A,ICE98|A,Nemrut-1|A,Nie1-2|A,Sha|A
AT1G61730	22794320-22794446	22794325	T	SPLICE_SIGNAL_SNP	Ler-1|A
AT1G61730	22794320-22794446	22794332	A	SNP_EI	Ler-1|G
AT1G61730	22794320-22794446	22794335	C	SNP_EI	Leo-1|T
AT1G61730	22794320-22794446	22794349	T	SNP_EI	Ler-1|G
AT1G61730	22794320-22794446	22794353	G	SNP_EI	Agu-1|C,Bak-2|C,Bak-7|C,Del-10|C,Dog-4|C,Don-0|C,Ey15-2|C,Fei-0|C,HKT2.4|C,ICE102|C,ICE106|C,ICE111|C,ICE112|C,ICE120|C,ICE127|C,ICE138|C,ICE150|C,ICE152|C,ICE153|C,ICE163|C,ICE169|C,ICE173|C,ICE181|C,ICE1|C,ICE212|C,ICE213|C,ICE216|C,ICE21|C,ICE226|C,ICE228|C,ICE29|C,ICE33|C,ICE36|C,ICE49|C,ICE60|C,ICE61|C,ICE63|C,ICE70|C,ICE72|C,ICE73|C,ICE75|C,ICE79|C,ICE7|C,ICE97|C,ICE98|C,Istisu-1|C,Koch-1|C…
AT1G61730	22794320-22794446	22794355	G	SNP_EI	Ler-1|C
AT1G61730	22794320-22794446	22794368	C	SNP_EI	Ler-1|A
AT1G61730	22794320-22794446	22794379	T	SNP_EI	Agu-1|C,Bak-2|C,Bak-7|C,Cdm-0|C,Del-10|C,Dog-4|C,Don-0|C,Ey15-2|C,Fei-0|C,HKT2.4|C,ICE102|C,ICE104|C,ICE106|C,ICE107|C,ICE111|C,ICE112|C,ICE120|C,ICE127|C,ICE130|C,ICE134|C,ICE138|C,ICE150|C,ICE152|C,ICE153|C,ICE163|C,ICE169|C,ICE173|C,ICE181|C,ICE1|C,ICE212|C,ICE213|C,ICE216|C,ICE21|C,ICE226|C,ICE228|C,ICE29|C,ICE33|C,ICE36|C,ICE49|C,ICE50|C,ICE60|C,ICE61|C,ICE63|C,ICE70|C,ICE71|C,ICE72|C,ICE73|…
AT1G61730	22794320-22794446	22794387	G	SNP_EI	Cdm-0|T
AT1G61730	22794320-22794446	22794388	C	SNP_EI	ICE102|G,ICE106|G,ICE120|G,ICE163|G,ICE70|G,ICE97|G,ICE98|G,Nemrut-1|G,Nie1-2|G
AT1G61730	22794320-22794446	22794391	T	SNP_EI	Mer-6|A
AT1G61730	22794320-22794446	22794419	T	SNP_EI	Ey15-2|G,ICE112|G,ICE127|G,ICE169|G,ICE173|G,ICE212|G,ICE213|G,ICE21|G,ICE49|G,ICE61|G,ICE72|G,ICE7|G,Mer-6|G,Ped-0|G,Pra-6|G,Star-8|G,TueV13|G,Vash-1|G
AT1G61730	22794320-22794446	22794440	A	SPLICE_SIGNAL_SNP	Ler-1|G
AT1G61730	22794320-22794446	22794441	C	SPLICE_SIGNAL_SNP	Bak-7|T,Ey15-2|T,ICE112|T,ICE127|T,ICE169|T,ICE173|T,ICE212|T,ICE213|T,ICE21|T,ICE49|T,ICE61|T,ICE72|T,ICE7|T,Mer-6|T,Ped-0|T,Star-8|T,TueV13|T,Vash-1|T
AT1G61730	22794320-22794446	22794442	G	SPLICE_SIGNAL_SNP	Bak-7|T,Ey15-2|T,ICE112|T,ICE127|T,ICE169|T,ICE173|T,ICE212|T,ICE213|T,ICE21|T,ICE49|T,ICE61|T,ICE72|T,ICE7|T,Mer-6|T,Ped-0|T,Star-8|T,TueV13|T,Vash-1|T
AT1G61730	22794320-22794446	22794443	A	SPLICE_SIGNAL_SNP	Bak-7|G,Ey15-2|G,ICE112|G,ICE127|G,ICE169|G,ICE173|G,ICE212|G,ICE213|G,ICE21|G,ICE49|G,ICE61|G,ICE72|G,ICE7|G,Mer-6|G,Ped-0|G,Star-8|G,TueV13|G,Vash-1|G
AT1G61730	22794320-22794446	22794452	T	SNP_EI	Cdm-0|G
AT1G61730	22794320-22794446	22794456	A	SNP_EI	Agu-1|G,Bak-2|G,Cdm-0|G,Del-10|G,Dog-4|G,Don-0|G,Fei-0|G,HKT2.4|G,ICE102|G,ICE104|G,ICE106|G,ICE107|G,ICE111|G,ICE119|G,ICE120|G,ICE130|G,ICE134|G,ICE138|G,ICE150|G,ICE152|G,ICE153|G,ICE163|G,ICE181|G,ICE1|G,ICE216|G,ICE226|G,ICE228|G,ICE29|G,ICE33|G,ICE36|G,ICE50|G,ICE60|G,ICE63|G,ICE70|G,ICE71|G,ICE73|G,ICE75|G,ICE79|G,ICE91|G,ICE92|G,ICE93|G,ICE97|G,ICE98|G,Istisu-1|G,Kastel-1|G,Koch-1|G,Lag2.…
AT1G61970	22904790-22904861	22904782	T	SNP_EI	Ler-1|G
AT1G61970	22904790-22904861	22904801	C	SNP_EI	Bak-2|T,Bak-7|T,Cdm-0|T,Del-10|T,Dog-4|T,Don-0|T,Fei-0|T,HKT2.4|T,ICE106|T,ICE107|T,ICE111|T,ICE120|T,ICE127|T,ICE130|T,ICE134|T,ICE138|T,ICE150|T,ICE152|T,ICE153|T,ICE169|T,ICE173|T,ICE181|T,ICE216|T,ICE21|T,ICE29|T,ICE36|T,ICE49|T,ICE50|T,ICE61|T,ICE71|T,ICE72|T,ICE73|T,ICE75|T,ICE79|T,ICE7|T,ICE93|T,ICE97|T,ICE98|T,Istisu-1|T,Kastel-1|T,Koch-1|T,Leo-1|T,Lerik1-3|T,Ped-0|T,Pra-6|T,Qui-0|T,Sha|T…
AT1G61970	22904790-22904861	22904805	C	SNP_EI	Rue3-1-31|T
AT1G61970	22904790-22904861	22904813	T	SNP_EI	Cdm-0|C
AT1G61970	22904790-22904861	22904834	T	SNP_EI	Ler-1|C
AT1G61970	22904790-22904861	22904847	A	SNP_EI	Don-0|T
AT1G62010	22916260-22916396	22916260	G	BP_SNP	Qui-0|A
AT1G62010	22916260-22916396	22916261	G	BP_SNP	ICE60|A,Ped-0|A
AT1G62010	22916260-22916396	22916278	T	SNP_EI	ICE60|A,Ped-0|A
AT1G62010	22916260-22916396	22916279	A	SNP_EI	ICE138|C
AT1G62010	22916260-22916396	22916288	G	SNP_EI	ICE181|C
AT1G62010	22916260-22916396	22916309	C	SNP_EI	Agu-1|A,Bak-2|A,Dog-4|A,Don-0|A,ICE102|A,ICE138|A,ICE212|A,ICE213|A,ICE216|A,ICE226|A,ICE228|A,Istisu-1|A,Lerik1-3|A,Pra-6|A,TueV13|A,Vie-0|A
AT1G62010	22916260-22916396	22916311	C	SNP_EI	Agu-1|A,Bak-2|A,Dog-4|A,Don-0|A,ICE102|A,ICE138|A,ICE212|A,ICE213|A,ICE216|A,ICE226|A,ICE228|A,Istisu-1|A,Lerik1-3|A,Pra-6|G,TueV13|A,Vie-0|A
AT1G62010	22916260-22916396	22916320	T	SNP_EI	Agu-1|C,Bak-2|C,Dog-4|C,Don-0|C,ICE102|C,ICE138|C,ICE212|C,ICE213|C,ICE216|C,ICE226|C,ICE228|C,ICE60|C,Istisu-1|C,Lerik1-3|C,Ped-0|C,Pra-6|C,TueV13|C,Vie-0|C
AT1G62010	22916260-22916396	22916351	A	SNP_EI	Ler-1|C
AT1G62010	22916260-22916396	22916367	A	SNP_EI	ICE33|G,ICE36|G,ICE97|G,ICE98|G
AT1G62010	22916260-22916396	22916388	T	SPLICE_SIGNAL_SNP	Sha|C
AT1G62010	22916260-22916396	22916391	C	SPLICE_SIGNAL_SNP	ICE104|T,ICE112|T,ICE63|T,ICE92|T
AT1G62010	22916260-22916396	22916392	A	SPLICE_SIGNAL_SNP	Don-0|G
AT1G62380	23082646-23082752	23082673	T	SNP_EI	ICE60|A,ICE71|A,ICE73|A,ICE75|A,Lerik1-3|A
AT1G62390	23085086-23086237	23085103	A	SNP_EI	Ler-1|T
AT1G62390	23085086-23086237	23085105	A	SNP_EI	Ler-1|T
AT1G62390	23085086-23086237	23085107	A	SNP_EI	Ler-1|T
AT1G62390	23085086-23086237	23085109	A	SNP_EI	Ler-1|T
AT1G62390	23085086-23086237	23085114	A	SNP_EI	Ler-1|T
AT1G62390	23085086-23086237	23085124	G	SNP_EI	ICE169|C,ICE173|C
AT1G62390	23085086-23086237	23085135	G	SNP_EI	Ler-1|A
AT1G62390	23085086-23086237	23085180	A	SNP_EI	Ler-1|T
AT1G62390	23085086-23086237	23085198	A	SNP_EI	Ler-1|T
AT1G62390	23085086-23086237	23085214	G	SNP_EI	Ler-1|A
AT1G62390	23085086-23086237	23085218	G	SNP_EI	Ler-1|T
AT1G62390	23085086-23086237	23085234	G	SNP_EI	Ler-1|A
AT1G62390	23085086-23086237	23085238	A	SNP_EI	Ler-1|G
AT1G62390	23085086-23086237	23085260	C	SNP_EI	Ler-1|G
AT1G62390	23085086-23086237	23085270	G	SNP_EI	Ler-1|A
AT1G62390	23085086-23086237	23085275	A	SNP_EI	Ler-1|G
AT1G62390	23085086-23086237	23085278	T	SNP_EI	Ler-1|C
AT1G62390	23085086-23086237	23085283	C	SNP_EI	Ler-1|A
AT1G62390	23085086-23086237	23085285	G	SNP_EI	Ler-1|A
AT1G62390	23085086-23086237	23085287	G	SNP_EI	Ler-1|A
AT1G62390	23085086-23086237	23085319	A	SNP_EI	Ler-1|G
AT1G62390	23085086-23086237	23085333	T	SNP_EI	Ler-1|A
AT1G62390	23085086-23086237	23085382	C	SNP_EI	Cdm-0|T,ICE163|T,ICE212|T,ICE213|T,ICE7|T,ICE93|T,Kastel-1|T,Leo-1|T,Rue3-1-31|T,Xan-1|T
AT1G62390	23085086-23086237	23085390	G	SNP_EI	Ler-1|A
AT1G62390	23085086-23086237	23085439	T	SNP_EI	Ler-1|C
AT1G62390	23085086-23086237	23085454	C	SNP_EI	ICE112|T
AT1G62390	23085086-23086237	23085467	G	SNP_EI	Ler-1|A
AT1G62390	23085086-23086237	23085475	A	SNP_EI	Agu-1|G,Bak-2|G,Bak-7|G,Dog-4|G,Ey15-2|G,Fei-0|G,HKT2.4|G,ICE102|G,ICE104|G,ICE106|G,ICE107|G,ICE111|G,ICE120|G,ICE138|G,ICE150|G,ICE152|G,ICE153|G,ICE181|G,ICE1|G,ICE216|G,ICE21|G,ICE29|G,ICE33|G,ICE36|G,ICE63|G,ICE79|G,ICE91|G,ICE92|G,ICE97|G,ICE98|G,Koch-1|G,Lag2.2|G,Lerik1-3|G,Nemrut-1|G,Mer-6|G,Nie1-2|G,Pra-6|G,Qui-0|G,Sha|G,TueSB30-3|G,Tuescha9|G,TueV13|G,TueWa1-2|G,Vash-1|G,WalhaesB4|G,Yeg…
AT1G62390	23085086-23086237	23085519	G	SNP_EI	Bak-7|A,Cdm-0|A,Fei-0|A,ICE107|A,ICE163|A,ICE212|A,ICE213|A,ICE7|A,ICE93|A,Kastel-1|A,Leo-1|A,Lerik1-3|A,Nemrut-1|A,Rue3-1-31|A,TueWa1-2|A,Xan-1|A
AT1G62390	23085086-23086237	23085550	T	SNP_EI	Ler-1|A
AT1G62390	23085086-23086237	23085628	G	SNP_EI	Mer-6|A
AT1G62390	23085086-23086237	23085669	C	SNP_EI	Don-0|T
AT1G62390	23085086-23086237	23085814	A	SNP_EI	ICE216|C
AT1G62390	23085086-23086237	23085815	C	SNP_EI	TueV13|T
AT1G62390	23085086-23086237	23085834	G	SNP_EI	Ler-1|A
AT1G62390	23085086-23086237	23085864	T	SNP_EI	Ler-1|A
AT1G62390	23085086-23086237	23085866	T	SNP_EI	Ler-1|A
AT1G62390	23085086-23086237	23085917	G	SNP_EI	Ped-0|A
AT1G62390	23085086-23086237	23085955	C	SNP_EI	Del-10|A
AT1G62390	23085086-23086237	23085960	T	SNP_EI	Ler-1|C
AT1G62390	23085086-23086237	23086026	T	SNP_EI	Agu-1|A
AT1G62390	23085086-23086237	23086081	A	SNP_EI	ICE21|G
AT1G62390	23085086-23086237	23086098	G	SNP_EI	ICE1|A,Koch-1|A
AT1G62390	23085086-23086237	23086198	C	SNP_EI	Lag2.2|T
AT1G62390	23085086-23086237	23086219	C	SNP_EI	ICE49|T
AT1G62760	23238099-23238507	23238089	G	SNP_EI	ICE138|T,ICE150|T,ICE152|T,ICE153|T,Nemrut-1|T,Sha|T
AT1G62760	23238099-23238507	23238096	G	SNP_EI	ICE138|A,ICE150|A,ICE152|A,ICE153|A,Nemrut-1|A,Sha|A
AT1G62760	23238099-23238507	23238104	A	SPLICE_SIGNAL_SNP	ICE138|G,ICE150|G,ICE152|G,ICE153|G,Nemrut-1|G,Sha|G
AT1G62760	23238099-23238507	23238105	T	SPLICE_SIGNAL_SNP	Cdm-0|C,Ey15-2|C,Fei-0|C,ICE104|C,ICE119|C,ICE79|C,ICE91|C,ICE92|C,ICE93|C,Nie1-2|C,Rue3-1-31|C,TueSB30-3|C,TueV13|C,TueWa1-2|C
AT1G62760	23238099-23238507	23238108	A	SPLICE_SIGNAL_SNP	Agu-1|T,Bak-7|T,Don-0|T,ICE120|T,ICE33|T,ICE49|T,ICE50|T,Istisu-1|T,Mer-6|T,Qui-0|T,Vie-0|T,Yeg-1|T
AT1G62760	23238099-23238507	23238110	A	SNP_EI	Agu-1|G,Bak-7|G,Don-0|G,ICE120|G,ICE49|G,ICE50|G,Mer-6|G,Qui-0|G,Vie-0|G,Yeg-1|G
AT1G62760	23238099-23238507	23238115	G	SNP_EI	Agu-1|A,Don-0|A,ICE120|A,ICE49|A,Qui-0|A,Vie-0|A
AT1G62760	23238099-23238507	23238135	A	SNP_EI	ICE138|T,ICE150|T,ICE152|T,ICE153|T,Sha|T
AT1G62760	23238099-23238507	23238174	T	SNP_EI	Cdm-0|G,Ey15-2|G,Fei-0|G,ICE104|G,ICE119|G,ICE79|G,ICE91|G,ICE92|G,ICE93|G,Nie1-2|G,Rue3-1-31|G,TueSB30-3|G,TueV13|G,TueWa1-2|G
AT1G62760	23238099-23238507	23238184	A	SNP_EI	Agu-1|G,Cdm-0|G,Ey15-2|G,ICE104|G,ICE119|G,ICE120|G,ICE138|G,ICE150|G,ICE152|G,ICE153|G,ICE33|G,ICE49|G,ICE50|G,ICE79|G,ICE91|G,ICE93|G,Istisu-1|G,Nie1-2|G,Qui-0|G,Rue3-1-31|G,Sha|G,TueSB30-3|G,TueV13|G,TueWa1-2|G,Vie-0|G,Yeg-1|G
AT1G62760	23238099-23238507	23238185	G	SNP_EI	Cdm-0|A,Ey15-2|A,ICE104|A,ICE79|A,ICE91|A,ICE92|A,ICE93|A,Nie1-2|A,TueV13|A,TueWa1-2|A
AT1G62760	23238099-23238507	23238204	T	SNP_EI	Cdm-0|G,Ey15-2|G,Fei-0|G,ICE104|G,ICE119|G,ICE79|G,ICE91|G,ICE92|G,ICE93|G,Nie1-2|G,Rue3-1-31|G,TueSB30-3|G,TueWa1-2|G
AT1G62760	23238099-23238507	23238206	A	SNP_EI	Agu-1|G,Don-0|G,ICE120|G,ICE138|G,ICE150|G,ICE153|G,ICE33|G,ICE49|G,ICE50|G,Istisu-1|G,Qui-0|G,Vie-0|G,Yeg-1|G
AT1G62760	23238099-23238507	23238208	A	SNP_EI	Agu-1|G,Don-0|G,ICE120|G,ICE138|G,ICE150|G,ICE153|G,ICE33|G,ICE49|G,ICE50|G,Istisu-1|G,Mer-6|G,Qui-0|G,Vie-0|G,Yeg-1|G
AT1G62760	23238099-23238507	23238209	A	SNP_EI	Don-0|G,ICE120|G,ICE150|G,Mer-6|G,Qui-0|G,Vie-0|G,Yeg-1|G
AT1G62760	23238099-23238507	23238226	G	SNP_EI	ICE127|A,ICE1|A,Lerik1-3|A
AT1G62760	23238099-23238507	23238282	A	SNP_EI	ICE138|T,ICE152|T,ICE153|T,Nemrut-1|T,Sha|T
AT1G62760	23238099-23238507	23238306	T	SNP_EI	ICE102|G,ICE212|G,ICE213|G,ICE21|G,ICE70|G,ICE75|G,ICE7|G,ICE97|G,ICE98|G,Qui-0|G,Vash-1|G
AT1G62760	23238099-23238507	23238351	T	SNP_EI	Cdm-0|G,Ey15-2|G,Fei-0|G,ICE104|G,ICE79|G,ICE91|G,ICE93|G,Nie1-2|G,TueWa1-2|G
AT1G62760	23238099-23238507	23238373	G	SNP_EI	ICE127|A,ICE1|A,Lerik1-3|A
AT1G62760	23238099-23238507	23238381	T	SNP_EI	Xan-1|A
AT1G62760	23238099-23238507	23238417	T	SNP_EI	Cdm-0|C,Ey15-2|C,Fei-0|C,ICE104|C,ICE119|C,ICE79|C,ICE91|C,ICE92|C,ICE93|C,Nie1-2|C,Rue3-1-31|C,TueSB30-3|C,TueV13|C,TueWa1-2|C
AT1G62760	23238099-23238507	23238424	G	SNP_EI	ICE134|A,ICE75|A
AT1G62760	23238099-23238507	23238449	T	SNP_EI	Agu-1|C,Bak-7|C,Don-0|C,ICE107|C,ICE120|C,ICE130|C,ICE134|C,ICE138|C,ICE150|C,ICE152|C,ICE153|C,ICE226|C,ICE228|C,ICE33|C,ICE49|C,ICE50|C,ICE72|C,ICE75|C,ICE97|C,ICE98|C,Istisu-1|A,Nemrut-1|C,Mer-6|C,Ped-0|C,Qui-0|C,Sha|C,Tuescha9|C,Vie-0|C,WalhaesB4|C,Xan-1|C,Yeg-1|C
AT1G62760	23238099-23238507	23238456	G	SNP_EI	Cdm-0|A,Ey15-2|A,Fei-0|A,ICE104|A,ICE119|A,ICE79|A,ICE91|A,ICE92|A,ICE93|A,Nie1-2|A,Rue3-1-31|A,TueSB30-3|A,TueV13|A,TueWa1-2|A
AT1G62760	23238099-23238507	23238459	G	SNP_EI	Bak-7|A,Yeg-1|A
AT1G62760	23238099-23238507	23238481	T	SNP_EI	Cdm-0|A,Ey15-2|A,Fei-0|A,ICE104|A,ICE119|A,ICE79|A,ICE91|A,ICE92|A,ICE93|A,Nie1-2|A,Rue3-1-31|A,TueSB30-3|A,TueV13|A,TueWa1-2|A
AT1G62760	23238099-23238507	23238484	A	SNP_EI	ICE33|C
AT1G62760	23238099-23238507	23238485	G	SNP_EI	Xan-1|A
AT1G62760	23238099-23238507	23238492	G	SNP_EI	Cdm-0|A,Ey15-2|A,Fei-0|A,ICE104|A,ICE107|T,ICE119|A,ICE130|T,ICE134|T,ICE226|T,ICE228|T,ICE72|T,ICE73|T,ICE75|T,ICE79|A,ICE91|A,ICE92|A,ICE93|A,ICE97|T,ICE98|T,Nie1-2|A,Ped-0|T,Rue3-1-31|A,TueSB30-3|A,Tuescha9|T,TueV13|A,TueWa1-2|A,WalhaesB4|T,Xan-1|T
AT1G62870	23284901-23286193	23284916	T	SNP_EI	Agu-1|A,Bak-2|A,Cdm-0|A,Del-10|A,Dog-4|A,Fei-0|A,HKT2.4|A,ICE102|A,ICE111|A,ICE119|A,ICE120|A,ICE127|A,ICE130|A,ICE134|A,ICE138|A,ICE150|A,ICE152|A,ICE153|A,ICE163|A,ICE169|A,ICE173|A,ICE181|A,ICE1|A,ICE212|A,ICE213|A,ICE216|A,ICE21|A,ICE226|A,ICE228|A,ICE33|A,ICE36|A,ICE60|A,ICE63|A,ICE70|A,ICE71|A,ICE72|A,ICE73|A,ICE75|A,ICE79|A,ICE7|A,ICE92|A,ICE93|A,ICE97|A,ICE98|A,Istisu-1|A,Kastel-1|A,Koch-…
AT1G62870	23284901-23286193	23284951	C	SNP_EI	ICE104|G
AT1G62870	23284901-23286193	23284976	A	SNP_EI	Agu-1|G,Bak-2|G,Cdm-0|G,Del-10|G,Dog-4|G,Fei-0|G,HKT2.4|G,ICE102|G,ICE111|G,ICE119|G,ICE120|G,ICE127|G,ICE130|G,ICE134|G,ICE138|G,ICE150|G,ICE152|G,ICE153|G,ICE163|G,ICE169|G,ICE173|G,ICE181|G,ICE1|G,ICE212|G,ICE213|G,ICE216|G,ICE21|G,ICE226|G,ICE228|G,ICE33|G,ICE36|G,ICE60|G,ICE63|G,ICE70|G,ICE71|G,ICE72|G,ICE73|G,ICE75|G,ICE79|G,ICE7|G,ICE92|G,ICE93|G,ICE97|G,ICE98|G,Istisu-1|G,Kastel-1|G,Koch-…
AT1G62870	23284901-23286193	23284992	A	SNP_EI	Agu-1|G,Bak-2|G,Cdm-0|G,Del-10|G,Dog-4|G,Fei-0|G,HKT2.4|G,ICE102|G,ICE104|G,ICE107|G,ICE111|G,ICE119|G,ICE120|G,ICE127|G,ICE130|G,ICE134|G,ICE138|G,ICE150|G,ICE152|G,ICE153|G,ICE163|G,ICE169|G,ICE173|G,ICE181|G,ICE1|G,ICE212|G,ICE213|G,ICE216|G,ICE21|G,ICE226|G,ICE228|G,ICE29|G,ICE33|G,ICE36|G,ICE60|G,ICE61|G,ICE63|G,ICE70|G,ICE71|G,ICE72|G,ICE73|G,ICE75|G,ICE79|G,ICE7|G,ICE92|G,ICE93|G,ICE97|G,I…
AT1G62870	23284901-23286193	23285044	C	SNP_EI	Agu-1|T,Bak-2|T,Fei-0|T,ICE111|T,ICE127|T,ICE134|T,ICE138|T,ICE150|T,ICE152|T,ICE153|T,ICE169|T,ICE173|T,ICE181|T,ICE212|T,ICE213|T,ICE216|T,ICE226|T,ICE228|T,ICE33|T,ICE36|T,ICE60|T,ICE63|T,ICE72|T,ICE73|T,ICE75|T,ICE7|T,ICE97|T,ICE98|T,Istisu-1|T,Lag2.2|T,Lerik1-3|T,Nemrut-1|T,Pra-6|T,Rue3-1-31|T,Sha|T,Star-8|T,Tuescha9|T,TueV13|T,TueWa1-2|T,Vash-1|T,WalhaesB4|T
AT1G62870	23284901-23286193	23285054	A	SNP_EI	ICE169|G,ICE173|G
AT1G62870	23284901-23286193	23285156	T	SNP_EI	Agu-1|C,Bak-2|C,Cdm-0|C,Del-10|C,Dog-4|C,Fei-0|C,HKT2.4|C,ICE102|C,ICE111|C,ICE119|C,ICE120|C,ICE127|C,ICE130|C,ICE134|C,ICE138|C,ICE150|C,ICE152|C,ICE153|C,ICE163|C,ICE169|C,ICE173|C,ICE181|C,ICE1|C,ICE212|C,ICE213|C,ICE216|C,ICE21|C,ICE226|C,ICE228|C,ICE33|C,ICE36|C,ICE60|C,ICE63|C,ICE70|C,ICE71|C,ICE72|C,ICE73|C,ICE75|C,ICE79|C,ICE7|C,ICE92|C,ICE93|C,ICE97|C,ICE98|C,Istisu-1|C,Kastel-1|C,Koch-…
AT1G62870	23284901-23286193	23285165	C	SNP_EI	Bak-7|T,ICE226|T,ICE228|T
AT1G62870	23284901-23286193	23285174	A	SNP_EI	Agu-1|G,Bak-2|G,Cdm-0|G,Del-10|G,Dog-4|G,Fei-0|G,HKT2.4|G,ICE102|G,ICE111|G,ICE119|G,ICE120|G,ICE127|G,ICE130|G,ICE134|G,ICE138|G,ICE150|G,ICE152|G,ICE153|G,ICE163|G,ICE169|G,ICE173|G,ICE181|G,ICE1|G,ICE212|G,ICE213|G,ICE216|G,ICE21|G,ICE226|G,ICE228|G,ICE33|G,ICE36|G,ICE60|G,ICE63|G,ICE70|G,ICE71|G,ICE72|G,ICE73|G,ICE75|G,ICE79|G,ICE7|G,ICE92|G,ICE93|G,ICE97|G,ICE98|G,Istisu-1|G,Kastel-1|G,Koch-…
AT1G62870	23284901-23286193	23285226	T	SNP_EI	ICE216|C
AT1G62870	23284901-23286193	23285243	G	SNP_EI	Agu-1|T,Bak-2|T,Cdm-0|T,Del-10|T,Dog-4|T,Fei-0|T,HKT2.4|T,ICE102|T,ICE111|T,ICE119|T,ICE120|T,ICE127|T,ICE130|T,ICE134|T,ICE138|T,ICE150|T,ICE152|T,ICE153|T,ICE163|T,ICE169|T,ICE173|T,ICE181|T,ICE1|T,ICE212|T,ICE213|T,ICE216|T,ICE21|T,ICE226|T,ICE228|T,ICE33|T,ICE36|T,ICE60|T,ICE63|T,ICE70|T,ICE71|T,ICE72|T,ICE73|T,ICE75|T,ICE79|T,ICE7|T,ICE92|T,ICE93|T,ICE97|T,ICE98|T,Istisu-1|T,Kastel-1|T,Koch-…
AT1G62870	23284901-23286193	23285273	G	SNP_EI	Agu-1|A,Bak-2|A,Cdm-0|A,Del-10|A,Dog-4|A,Fei-0|A,HKT2.4|A,ICE102|A,ICE111|A,ICE119|A,ICE120|A,ICE127|A,ICE130|A,ICE134|A,ICE138|A,ICE150|A,ICE152|A,ICE153|A,ICE163|A,ICE169|A,ICE173|A,ICE181|A,ICE1|A,ICE212|A,ICE213|A,ICE216|A,ICE21|A,ICE226|A,ICE228|A,ICE33|A,ICE36|A,ICE60|A,ICE63|A,ICE70|A,ICE71|A,ICE72|A,ICE73|A,ICE75|A,ICE79|A,ICE7|A,ICE92|A,ICE93|A,ICE97|A,ICE98|A,Istisu-1|A,Kastel-1|A,Koch-…
AT1G62870	23284901-23286193	23285289	T	SNP_EI	Agu-1|A
AT1G62870	23284901-23286193	23285382	T	SNP_EI	ICE50|A
AT1G62870	23284901-23286193	23285411	C	SNP_EI	ICE71|T,Koch-1|T
AT1G62870	23284901-23286193	23285450	C	SNP_EI	ICE71|T,Koch-1|T
AT1G62870	23284901-23286193	23285462	A	SNP_EI	ICE107|T
AT1G62870	23284901-23286193	23285487	C	SNP_EI	Cdm-0|A,ICE163|A,ICE92|A,ICE93|A,Ler-0|A
AT1G62870	23284901-23286193	23285515	G	SNP_EI	Ler-1|A
AT1G62870	23284901-23286193	23285522	T	SNP_EI	Ler-1|A
AT1G62870	23284901-23286193	23285538	G	SNP_EI	Don-0|A
AT1G62870	23284901-23286193	23285548	A	SNP_EI	Ler-1|C
AT1G62870	23284901-23286193	23285561	A	SNP_EI	ICE71|G,Koch-1|G
AT1G62870	23284901-23286193	23285567	C	SNP_EI	ICE71|T,Koch-1|T
AT1G62870	23284901-23286193	23285623	C	SNP_EI	Ler-1|A
AT1G62870	23284901-23286193	23285648	A	SNP_EI	Ler-1|G
AT1G62870	23284901-23286193	23285653	G	SNP_EI	ICE104|T
AT1G62870	23284901-23286193	23285679	G	SNP_EI	Ler-1|A
AT1G62870	23284901-23286193	23285693	T	SNP_EI	Ler-1|A
AT1G62870	23284901-23286193	23285694	A	SNP_EI	Sha|G
AT1G62870	23284901-23286193	23285705	T	SNP_EI	Ler-1|C
AT1G62870	23284901-23286193	23285711	G	SNP_EI	Kastel-1|T
AT1G62870	23284901-23286193	23285712	G	SNP_EI	Ler-1|A
AT1G62870	23284901-23286193	23285714	T	SNP_EI	Ler-1|A
AT1G62870	23284901-23286193	23285719	T	SNP_EI	Ler-1|A
AT1G62870	23284901-23286193	23285725	C	SNP_EI	Ler-1|T
AT1G62870	23284901-23286193	23285749	G	SNP_EI	Cdm-0|T,ICE92|T,ICE93|T
AT1G62870	23284901-23286193	23285765	C	SNP_EI	ICE71|T,Koch-1|T,Xan-1|T
AT1G62870	23284901-23286193	23285767	A	SNP_EI	Don-0|G
AT1G62870	23284901-23286193	23285770	T	SNP_EI	ICE216|C
AT1G62870	23284901-23286193	23285771	T	SNP_EI	ICE107|A
AT1G62870	23284901-23286193	23285790	A	SNP_EI	Ler-1|T
AT1G62870	23284901-23286193	23285795	A	SNP_EI	Mer-6|C
AT1G62870	23284901-23286193	23285800	A	SNP_EI	ICE71|C,Koch-1|C
AT1G62870	23284901-23286193	23285879	A	SNP_EI	Xan-1|C
AT1G62870	23284901-23286193	23285888	C	SNP_EI	Ler-1|T
AT1G62870	23284901-23286193	23285926	C	SNP_EI	Ler-1|T
AT1G62870	23284901-23286193	23285929	T	SNP_EI	Ler-1|A
AT1G62870	23284901-23286193	23285931	T	SNP_EI	Ler-1|G
AT1G62870	23284901-23286193	23285976	T	SNP_EI	ICE71|A,Koch-1|A,Xan-1|A
AT1G62870	23284901-23286193	23285980	T	SNP_EI	ICE104|C,ICE107|C,ICE29|C,ICE61|C
AT1G62870	23284901-23286193	23285984	C	SNP_EI	ICE71|T,Koch-1|T
AT1G62870	23284901-23286193	23285990	C	SNP_EI	ICE71|T,Koch-1|T,Xan-1|T
AT1G62870	23284901-23286193	23286008	G	SNP_EI	ICE71|C,Koch-1|C,Xan-1|C
AT1G62870	23284901-23286193	23286026	A	SNP_EI	ICE104|T,ICE107|T,ICE29|T,ICE61|T,ICE79|T
AT1G62870	23284901-23286193	23286035	A	SNP_EI	Ler-1|G
AT1G62870	23284901-23286193	23286045	G	SNP_EI	Ler-1|T
AT1G62870	23284901-23286193	23286065	A	SNP_EI	Agu-1|T,Bak-2|T,Cdm-0|T,Del-10|T,Dog-4|T,Don-0|T,Fei-0|T,HKT2.4|T,ICE102|T,ICE111|T,ICE119|T,ICE120|T,ICE127|T,ICE130|T,ICE138|T,ICE150|T,ICE152|T,ICE153|T,ICE163|T,ICE169|T,ICE173|T,ICE1|T,ICE212|T,ICE213|T,ICE216|T,ICE21|T,ICE33|T,ICE36|T,ICE49|T,ICE50|T,ICE60|T,ICE63|T,ICE71|T,ICE72|T,ICE7|T,ICE93|T,ICE97|T,ICE98|T,Istisu-1|T,Koch-1|T,Lag2.2|T,Lerik1-3|T,Nemrut-1|T,Mer-6|T,Pra-6|T,Qui-0|T,Rue3…
AT1G62870	23284901-23286193	23286194	A	SPLICE_SIGNAL_SNP	Don-0|C,ICE49|C,ICE50|C,ICE71|C,Koch-1|C,Mer-6|C,Xan-1|C
AT1G62970	23323746-23323830	23323774	G	SNP_EI	Kastel-1|A
AT1G62970	23323746-23323830	23323817	C	SNP_EI	Pra-6|T
AT1G62970	23324667-23325572	23324697	T	SNP_EI	Don-0|C,Mer-6|C,Ped-0|C,Xan-1|C
AT1G62970	23324667-23325572	23324736	C	SNP_EI	Don-0|T,Mer-6|T,Ped-0|T,Xan-1|T
AT1G62970	23324667-23325572	23324746	G	SNP_EI	Don-0|C,Mer-6|C,Ped-0|C,Xan-1|C
AT1G62970	23324667-23325572	23324752	T	SNP_EI	Don-0|C,Mer-6|C,Ped-0|C,Xan-1|C
AT1G62970	23324667-23325572	23324786	T	SNP_EI	Ler-0|C
AT1G62970	23324667-23325572	23324877	C	SNP_EI	Fei-0|T,Star-8|T,TueWa1-2|T
AT1G62970	23324667-23325572	23324908	G	SNP_EI	ICE70|A
AT1G62970	23324667-23325572	23324913	C	SNP_EI	Bak-7|T,Ey15-2|T,ICE29|T,Yeg-1|T
AT1G62970	23324667-23325572	23325043	C	SNP_EI	Don-0|T,ICE49|T,ICE50|T,ICE70|T,Mer-6|T,Ped-0|T,Xan-1|T
AT1G62970	23324667-23325572	23325116	T	SNP_EI	Don-0|C,ICE70|C,ICE72|C,Mer-6|C,Ped-0|C,Xan-1|C
AT1G62970	23324667-23325572	23325127	T	SNP_EI	Don-0|C,ICE70|C,ICE72|C,Mer-6|C,Ped-0|C,Xan-1|C
AT1G62970	23324667-23325572	23325184	T	SNP_EI	Nie1-2|C,Tuescha9|C,WalhaesB4|C
AT1G62970	23324667-23325572	23325185	G	SNP_EI	Nie1-2|A,Tuescha9|A,WalhaesB4|A
AT1G62970	23324667-23325572	23325194	G	SNP_EI	Agu-1|T,Bak-2|T,Bak-7|T,Cdm-0|T,Del-10|T,Dog-4|T,Ey15-2|T,Fei-0|T,HKT2.4|T,ICE102|T,ICE104|T,ICE106|T,ICE107|T,ICE111|T,ICE112|T,ICE119|T,ICE120|T,ICE127|T,ICE130|T,ICE134|T,ICE138|T,ICE150|T,ICE152|T,ICE153|T,ICE163|T,ICE169|T,ICE173|T,ICE181|T,ICE1|T,ICE212|T,ICE213|T,ICE216|T,ICE21|T,ICE226|T,ICE228|T,ICE29|T,ICE33|T,ICE36|T,ICE49|T,ICE50|T,ICE60|T,ICE61|T,ICE63|T,ICE71|T,ICE73|T,ICE75|T,ICE79…
AT1G62970	23324667-23325572	23325226	A	SNP_EI	Koch-1|T
AT1G62970	23324667-23325572	23325230	C	SNP_EI	Don-0|G,ICE70|G,ICE72|G,Xan-1|G
AT1G62970	23324667-23325572	23325232	A	SNP_EI	Don-0|T,ICE70|T,ICE72|T,Xan-1|T
AT1G62970	23324667-23325572	23325235	A	SNP_EI	Lag2.2|C
AT1G62970	23324667-23325572	23325244	C	SNP_EI	Don-0|A,ICE70|A,ICE72|A,Mer-6|A,Ped-0|A,Xan-1|A
AT1G62970	23324667-23325572	23325250	C	SNP_EI	Don-0|A,Mer-6|A,Ped-0|A,Xan-1|A
AT1G62970	23324667-23325572	23325262	A	SNP_EI	Don-0|C,ICE70|C,ICE72|C,Mer-6|C,Ped-0|C,Xan-1|C
AT1G62970	23324667-23325572	23325274	G	SNP_EI	Agu-1|A,Bak-2|A,Cdm-0|A,Del-10|A,Dog-4|A,HKT2.4|A,ICE107|A,ICE134|A,ICE138|A,ICE150|A,ICE152|A,ICE153|A,ICE163|A,ICE169|A,ICE173|A,ICE181|A,ICE1|A,ICE226|A,ICE228|A,ICE33|A,ICE49|A,ICE50|A,ICE60|A,ICE63|A,ICE75|A,ICE79|A,ICE7|A,ICE92|A,ICE97|A,ICE98|A,Koch-1|A,Lerik1-3|A,Nemrut-1|A,Sha|A,TueV13|A,Ler-0|A
AT1G62970	23324667-23325572	23325280	G	SNP_EI	Don-0|A,ICE70|A,ICE72|A,Mer-6|A,Ped-0|A,Xan-1|A
AT1G62970	23324667-23325572	23325284	T	SNP_EI	Don-0|C,ICE70|C,ICE72|C,Mer-6|C,Ped-0|C,Xan-1|C
AT1G62970	23324667-23325572	23325298	T	SNP_EI	Don-0|G,ICE70|G,ICE72|G,Mer-6|G,Ped-0|G,Xan-1|G
AT1G62970	23324667-23325572	23325316	C	SNP_EI	ICE72|T
AT1G62970	23324667-23325572	23325335	A	SNP_EI	Agu-1|G,Bak-2|G,Bak-7|G,Cdm-0|G,Del-10|G,Dog-4|G,Don-0|G,Ey15-2|G,Fei-0|G,HKT2.4|G,ICE102|G,ICE104|G,ICE106|G,ICE107|G,ICE111|G,ICE112|G,ICE119|G,ICE120|G,ICE127|G,ICE130|G,ICE134|G,ICE138|G,ICE150|G,ICE152|G,ICE153|G,ICE163|G,ICE169|G,ICE173|G,ICE181|G,ICE1|G,ICE212|G,ICE213|G,ICE216|G,ICE21|G,ICE226|G,ICE228|G,ICE29|G,ICE33|G,ICE36|G,ICE49|G,ICE50|G,ICE60|G,ICE61|G,ICE63|G,ICE70|G,ICE71|G,ICE72…
AT1G62970	23324667-23325572	23325350	A	SNP_EI	ICE70|T
AT1G62970	23324667-23325572	23325352	C	SNP_EI	Don-0|T,Mer-6|T,Ped-0|T,Xan-1|T
AT1G62970	23324667-23325572	23325369	A	SNP_EI	Ler-1|G
AT1G62970	23324667-23325572	23325377	T	SNP_EI	Ler-1|C
AT1G62970	23324667-23325572	23325397	A	SNP_EI	Don-0|T,Mer-6|T
AT1G62970	23324667-23325572	23325409	C	SNP_EI	Ler-1|T
AT1G62970	23324667-23325572	23325410	T	SNP_EI	Ler-1|A
AT1G62970	23324667-23325572	23325412	T	SNP_EI	ICE70|G,ICE72|G
AT1G62970	23324667-23325572	23325421	A	SNP_EI	Ler-1|G
AT1G62970	23324667-23325572	23325423	G	SNP_EI	Ler-1|A
AT1G62970	23324667-23325572	23325425	G	SNP_EI	Don-0|A,ICE70|A,ICE72|A,Mer-6|A,Ped-0|A,Xan-1|A
AT1G62970	23324667-23325572	23325427	C	SNP_EI	Don-0|T,ICE70|T,ICE72|T,Mer-6|T,Ped-0|T,Xan-1|T
AT1G62970	23324667-23325572	23325517	T	SNP_EI	ICE107|C
AT1G62970	23324667-23325572	23325539	C	SNP_EI	Bak-2|G,Lerik1-3|G
AT1G62970	23324667-23325572	23325543	A	SNP_EI	Ler-1|G
AT1G62970	23324667-23325572	23325558	A	SNP_EI	Don-0|C,ICE127|C,ICE61|C,ICE70|C,ICE72|C,ICE73|C,Mer-6|C,Ped-0|C,Xan-1|C
AT1G62970	23324667-23325572	23325564	C	SPLICE_SIGNAL_SNP	ICE70|T,ICE72|T
AT1G62970	23324667-23325572	23325582	A	SNP_EI	ICE7|T
AT1G62970	23324667-23325572	23325587	C	SNP_EI	Ler-1|T
AT1G63100	23400868-23400944	23400876	A	SPLICE_SIGNAL_SNP	Bak-2|C,Bak-7|C,Cdm-0|C,Del-10|C,Don-0|C,Ey15-2|C,Fei-0|C,HKT2.4|C,ICE102|C,ICE104|C,ICE106|C,ICE107|C,ICE111|C,ICE112|C,ICE119|C,ICE120|C,ICE163|C,ICE1|C,ICE21|C,ICE29|C,ICE33|C,ICE36|C,ICE49|C,ICE50|C,ICE70|C,ICE79|C,ICE7|C,ICE91|C,ICE92|C,ICE93|C,ICE97|C,ICE98|C,Istisu-1|C,Koch-1|C,Lag2.2|C,Leo-1|C,Lerik1-3|C,Nie1-2|C,Ped-0|C,Rue3-1-31|C,Star-8|C,TueSB30-3|C,TueV13|C,TueWa1-2|C,Vie-0|C,Walhaes…
AT1G63100	23400868-23400944	23400893	A	SNP_EI	Bak-7|T
AT1G63100	23400868-23400944	23400907	G	SNP_EI	Don-0|A,ICE111|A,ICE49|A,ICE50|A,ICE70|A,Ped-0|A
AT1G63100	23400868-23400944	23400917	A	SNP_EI	Ler-1|G
AT1G63100	23400868-23400944	23400930	A	SNP_EI	Tuescha9|G
AT1G63230	23451669-23451757	23451656	C	SNP_EI	Kastel-1|G,Vie-0|G,Yeg-1|G
AT1G63230	23451669-23451757	23451662	T	SNP_EI	Bak-7|A,ICE112|A,ICE130|A,ICE138|A,ICE150|A,ICE152|A,ICE153|A,ICE50|A,Sha|A,Tuescha9|A
AT1G63230	23451669-23451757	23451663	C	SNP_EI	Kastel-1|G,Vie-0|G,Yeg-1|G
AT1G63230	23451669-23451757	23451668	A	SPLICE_SIGNAL_SNP	Bak-7|G,ICE112|G,ICE130|G,ICE138|G,ICE150|G,ICE152|G,ICE153|G,ICE50|G,ICE71|G,Sha|G,Tuescha9|G,TueV13|G
AT1G63230	23451669-23451757	23451670	G	SPLICE_SITE_SNP	Bak-7|A,ICE112|A,ICE130|A,ICE138|A,ICE150|A,ICE152|A,ICE153|A,ICE50|A,ICE71|A,ICE73|A,Sha|A,Tuescha9|A,TueV13|A
AT1G63230	23451669-23451757	23451687	A	SNP_EI	Agu-1|T,Bak-7|T,ICE130|T,ICE138|T,ICE150|T,ICE152|T,ICE153|T,ICE50|T,ICE71|T,Sha|T,Tuescha9|T
AT1G63230	23451669-23451757	23451692	A	SNP_EI	Bak-2|G,Cdm-0|G,Dog-4|G,Don-0|G,HKT2.4|G,ICE119|G,ICE134|G,ICE181|G,ICE212|G,ICE213|G,ICE226|G,ICE228|G,ICE36|G,ICE63|G,ICE72|G,ICE75|G,ICE79|G,ICE7|G,ICE97|G,ICE98|G,Koch-1|G,Nemrut-1|G,Pra-6|G,Vash-1|G
AT1G63230	23451669-23451757	23451698	C	SNP_EI	Bak-2|T,Cdm-0|T,Don-0|T,ICE119|T,ICE134|T,ICE181|T,ICE212|T,ICE213|T,ICE226|T,ICE228|T,ICE36|T,ICE63|T,ICE72|T,ICE75|T,ICE79|T,ICE7|T,ICE97|T,ICE98|T,Koch-1|T,Nemrut-1|T,Pra-6|T,Vash-1|T
AT1G63230	23451669-23451757	23451710	T	SNP_EI	Kastel-1|G,Vie-0|G,Yeg-1|G
AT1G63230	23451669-23451757	23451729	C	SNP_EI	Kastel-1|T,Vie-0|T,Yeg-1|T
AT1G63230	23451669-23451757	23451735	A	SNP_EI	Kastel-1|G,Vie-0|G,Yeg-1|G
AT1G63630	23587415-23587549	23587415	G	BP_SNP	Nie1-2|T,Star-8|T,WalhaesB4|T
AT1G63630	23587415-23587549	23587435	C	SNP_EI	Agu-1|G,ICE119|T,ICE212|T,ICE213|T,ICE49|G,ICE50|G,Qui-0|G
AT1G63630	23587415-23587549	23587444	T	SNP_EI	ICE120|C,ICE134|C,ICE181|C,ICE79|C
AT1G63630	23587415-23587549	23587449	T	SNP_EI	ICE181|C,ICE79|C
AT1G63630	23587415-23587549	23587454	G	SNP_EI	Bak-2|A,Bak-7|A,Don-0|A,ICE106|A,ICE130|A,ICE138|A,ICE150|A,ICE152|A,ICE153|A,ICE29|A,ICE36|A,ICE60|A,ICE61|A,ICE73|A,ICE7|A,ICE91|A,Kastel-1|A,Koch-1|A,Lag2.2|A,Lerik1-3|A,Mer-6|A,Sha|A
AT1G63630	23587415-23587549	23587462	T	SNP_EI	ICE107|A,ICE120|A,ICE33|A,ICE63|A,ICE97|A
AT1G63630	23587415-23587549	23587467	A	SNP_EI	Bak-2|G,Bak-7|G,Don-0|G,ICE106|G,ICE107|G,ICE120|G,ICE130|G,ICE138|G,ICE150|G,ICE152|G,ICE153|G,ICE29|G,ICE33|G,ICE36|G,ICE50|G,ICE60|G,ICE61|G,ICE63|G,ICE71|G,ICE73|G,ICE79|G,ICE7|G,ICE91|G,ICE97|G,Kastel-1|G,Koch-1|G,Lag2.2|G,Lerik1-3|G,Mer-6|G,Ped-0|G,Sha|G
AT1G63630	23587415-23587549	23587480	G	SNP_EI	Ey15-2|C,ICE104|C,ICE216|C,Nie1-2|C,Star-8|C,Vash-1|C
AT1G63630	23587415-23587549	23587492	C	SNP_EI	Ped-0|G
AT1G63630	23587415-23587549	23587505	C	SNP_EI	Bak-2|G,Bak-7|G,Del-10|G,Dog-4|G,Don-0|G,HKT2.4|G,ICE102|G,ICE106|G,ICE107|G,ICE112|G,ICE120|G,ICE130|G,ICE138|G,ICE150|G,ICE152|G,ICE153|G,ICE169|G,ICE173|G,ICE181|G,ICE212|G,ICE29|G,ICE33|G,ICE36|G,ICE50|G,ICE60|G,ICE61|G,ICE63|G,ICE71|G,ICE73|G,ICE7|G,ICE91|G,Kastel-1|G,Koch-1|G,Lag2.2|G,Leo-1|G,Lerik1-3|G,Mer-6|G,Rue3-1-31|G,Sha|G,TueSB30-3|G,Tuescha9|G,TueV13|G,Ler-0|G
AT1G63630	23587415-23587549	23587532	G	SNP_EI	Bak-2|A,Bak-7|A,Del-10|A,Dog-4|A,Don-0|A,HKT2.4|A,ICE102|A,ICE107|A,ICE111|A,ICE112|A,ICE120|A,ICE130|A,ICE134|A,ICE138|A,ICE150|A,ICE152|A,ICE153|A,ICE169|A,ICE173|A,ICE181|A,ICE29|A,ICE33|A,ICE36|A,ICE60|A,ICE61|A,ICE73|A,ICE79|A,ICE7|A,ICE91|A,Kastel-1|A,Koch-1|A,Lag2.2|A,Leo-1|A,Lerik1-3|A,Mer-6|A,Rue3-1-31|A,Sha|A,TueSB30-3|A,Tuescha9|A,TueV13|A,Ler-0|A
AT1G63630	23587415-23587549	23587535	A	SNP_EI	Bak-2|G,Bak-7|G,Del-10|G,Dog-4|G,Don-0|G,HKT2.4|G,ICE102|G,ICE104|C,ICE107|G,ICE111|G,ICE112|G,ICE120|G,ICE130|G,ICE134|G,ICE138|G,ICE150|G,ICE152|G,ICE153|G,ICE169|G,ICE173|G,ICE181|G,ICE29|G,ICE33|G,ICE36|G,ICE60|G,ICE61|G,ICE73|G,ICE79|G,ICE7|G,ICE91|G,Koch-1|G,Lag2.2|G,Leo-1|G,Lerik1-3|G,Mer-6|G,Rue3-1-31|G,Sha|G,TueSB30-3|G,Tuescha9|G,TueV13|G,Ler-0|G
AT1G63630	23587415-23587549	23587540	T	SPLICE_SIGNAL_SNP	Bak-2|A,Bak-7|A,Del-10|A,Dog-4|A,Don-0|A,HKT2.4|A,ICE102|A,ICE107|A,ICE111|A,ICE112|A,ICE120|A,ICE130|A,ICE134|A,ICE138|A,ICE150|A,ICE152|A,ICE153|A,ICE169|A,ICE173|A,ICE181|A,ICE29|A,ICE33|A,ICE36|A,ICE60|A,ICE61|A,ICE7|A,ICE91|A,Koch-1|A,Leo-1|A,Lerik1-3|A,Mer-6|A,Rue3-1-31|A,Sha|A,TueSB30-3|A,Tuescha9|A,TueV13|A
AT1G63630	23587415-23587549	23587548	G	SPLICE_SITE_SNP	Bak-2|A,Bak-7|A,Del-10|A,Dog-4|A,Don-0|A,HKT2.4|A,ICE102|A,ICE107|A,ICE111|A,ICE112|A,ICE120|A,ICE130|A,ICE138|A,ICE150|A,ICE152|A,ICE153|A,ICE169|A,ICE173|A,ICE29|A,ICE33|A,ICE36|A,ICE60|A,ICE61|A,ICE7|A,ICE91|A,Koch-1|A,Lag2.2|A,Leo-1|A,Lerik1-3|A,Mer-6|A,Rue3-1-31|A,Sha|A,TueSB30-3|A,Tuescha9|A,TueV13|A,Ler-0|A
AT1G63630	23587415-23587549	23587549	T	SPLICE_SIGNAL_SNP	Bak-2|C,Bak-7|C,Del-10|C,Dog-4|C,Don-0|C,HKT2.4|C,ICE102|C,ICE107|C,ICE111|C,ICE112|C,ICE120|C,ICE130|C,ICE138|C,ICE150|C,ICE152|C,ICE153|C,ICE169|C,ICE173|C,ICE29|C,ICE33|C,ICE36|C,ICE60|C,ICE61|C,ICE7|C,ICE91|C,Koch-1|C,Lag2.2|C,Leo-1|C,Lerik1-3|C,Mer-6|C,Rue3-1-31|C,Sha|C,TueSB30-3|C,Tuescha9|C,TueV13|C,Ler-0|C
AT1G63630	23587415-23587549	23587550	G	SPLICE_SIGNAL_SNP	Cdm-0|C
AT1G63880	23713243-23713333	23713232	C	SNP_EI	Del-10|T,ICE138|T,ICE150|T,ICE152|T,ICE153|T,ICE163|T,ICE181|T,ICE21|T,ICE49|T,ICE71|T,ICE73|T,ICE75|T,ICE79|T,Sha|T,Star-8|T,TueV13|T,TueWa1-2|T
AT1G63880	23713243-23713333	23713267	G	SNP_EI	Cdm-0|C,Don-0|T,Fei-0|C,ICE112|T,ICE127|C,ICE134|C,ICE1|C,ICE49|T,ICE50|C,ICE72|C,ICE7|C,Istisu-1|T,Mer-6|C,Tuescha9|T,TueV13|T,Xan-1|T
AT1G63880	23713243-23713333	23713268	T	SNP_EI	Don-0|C,ICE112|C,ICE49|C,Istisu-1|C,Tuescha9|C,TueV13|C,Xan-1|C
AT1G63880	23713243-23713333	23713274	G	SNP_EI	Cdm-0|A
AT1G63880	23713243-23713333	23713275	T	SNP_EI	ICE127|C,ICE134|C,ICE50|C,ICE72|C
AT1G63880	23713243-23713333	23713277	G	SNP_EI	Del-10|A,ICE138|A,ICE150|A,ICE152|A,ICE153|A,ICE181|A,ICE21|A,ICE75|A,ICE79|A,Sha|A,Star-8|A,TueWa1-2|A
AT1G63880	23713243-23713333	23713292	A	SNP_EI	ICE112|C
AT1G63880	23713243-23713333	23713303	T	SNP_EI	Cdm-0|G
AT1G63880	23713243-23713333	23713318	T	SNP_EI	Del-10|C
AT1G63880	23713243-23713333	23713339	A	SNP_EI	ICE112|G
AT1G63880	23713243-23713333	23713340	G	SNP_EI	Fei-0|A,ICE127|A,ICE134|A,ICE49|A,ICE50|A,ICE72|A,ICE7|A,Mer-6|A,Ped-0|A,TueV13|A
AT1G63880	23713243-23713333	23713342	C	SNP_EI	Don-0|A,ICE112|A,Istisu-1|A,Tuescha9|A,Xan-1|A
AT1G63880	23713243-23713333	23713344	T	SNP_EI	Del-10|C,Don-0|C,Fei-0|C,ICE112|C,ICE127|C,ICE134|C,ICE138|C,ICE150|C,ICE152|C,ICE153|C,ICE163|C,ICE181|C,ICE21|C,ICE49|C,ICE50|C,ICE72|C,ICE75|C,ICE79|C,ICE7|C,Istisu-1|C,Mer-6|C,Ped-0|C,Sha|C,Star-8|C,Tuescha9|C,TueV13|C,TueWa1-2|C,Xan-1|C
AT1G64190	23826134-23826214	23826152	A	SNP_EI	Ler-1|T
AT1G64190	23826134-23826214	23826153	T	SNP_EI	Ler-1|G
AT1G64190	23826134-23826214	23826173	A	SNP_EI	Ler-1|G
AT1G64190	23826134-23826214	23826177	G	SNP_EI	Ler-1|C
AT1G64190	23826134-23826214	23826189	A	SNP_EI	Ler-1|T
AT1G64190	23826134-23826214	23826201	T	SNP_EI	Ler-1|C
AT1G64190	23826134-23826214	23826209	A	SPLICE_SIGNAL_SNP	Dog-4|G,Don-0|G,Ey15-2|G,Fei-0|G,ICE102|G,ICE104|G,ICE106|G,ICE107|G,ICE119|G,ICE120|G,ICE130|G,ICE150|G,ICE152|G,ICE153|G,ICE49|G,ICE50|G,ICE79|G,ICE91|G,ICE93|G,Istisu-1|G,Kastel-1|G,Lag2.2|G,Lerik1-3|G,Qui-0|G,Rue3-1-31|G,Star-8|G,TueSB30-3|G,Xan-1|G,Yeg-1|G
AT1G64190	23826134-23826214	23826213	G	SPLICE_SITE_SNP	Ler-1|T
AT1G64190	23826134-23826214	23826229	T	SNP_EI	Ler-1|C
AT1G64960	24133195-24133317	24133183	A	SNP_EI	Cdm-0|C,Dog-4|C,Don-0|C,Fei-0|C,ICE106|C,ICE127|C,ICE130|C,ICE134|C,ICE138|C,ICE150|C,ICE152|C,ICE153|C,ICE29|C,ICE49|C,ICE50|C,ICE61|C,ICE63|C,ICE71|C,ICE72|C,ICE73|C,ICE75|C,ICE7|C,ICE91|C,ICE97|C,Kastel-1|C,Koch-1|C,Sha|C,Yeg-1|C,Ler-0|C
AT1G64960	24133195-24133317	24133187	A	SNP_EI	Ler-1|G
AT1G64960	24133195-24133317	24133210	T	SNP_EI	Cdm-0|A,Dog-4|A,Don-0|A,Fei-0|A,ICE106|A,ICE127|A,ICE130|A,ICE134|A,ICE138|A,ICE150|A,ICE152|A,ICE153|A,ICE29|A,ICE49|A,ICE50|A,ICE61|A,ICE63|A,ICE71|A,ICE72|A,ICE73|A,ICE75|A,ICE7|A,ICE91|A,ICE97|A,Kastel-1|A,Koch-1|A,Sha|A,Yeg-1|A,Ler-0|A
AT1G64960	24133195-24133317	24133237	T	SNP_EI	Del-10|A
AT1G64960	24133195-24133317	24133248	C	SNP_EI	Tuescha9|T,TueV13|T
AT1G64960	24133195-24133317	24133276	A	SNP_EI	Ler-1|G
AT1G64960	24133195-24133317	24133283	A	SNP_EI	Ler-1|T
AT1G64960	24133195-24133317	24133284	T	SNP_EI	Cdm-0|A,Dog-4|A,Don-0|A,Fei-0|A,ICE106|A,ICE127|A,ICE130|A,ICE134|A,ICE138|A,ICE150|A,ICE152|A,ICE153|A,ICE29|A,ICE49|A,ICE50|A,ICE61|A,ICE63|A,ICE71|A,ICE72|A,ICE73|A,ICE75|A,ICE7|A,ICE91|A,ICE97|A,Kastel-1|A,Koch-1|A,Sha|A,Yeg-1|A,Ler-0|A
AT1G64960	24133195-24133317	24133295	A	SNP_EI	Cdm-0|C,Dog-4|C,Don-0|C,Fei-0|C,ICE106|C,ICE127|C,ICE130|C,ICE134|C,ICE138|C,ICE150|C,ICE152|C,ICE153|C,ICE29|C,ICE49|C,ICE50|C,ICE61|C,ICE63|C,ICE71|C,ICE72|C,ICE73|C,ICE75|C,ICE7|C,ICE91|C,ICE97|C,Kastel-1|C,Koch-1|C,Sha|C,Yeg-1|C,Ler-0|C
AT1G64960	24133195-24133317	24133296	A	SNP_EI	Cdm-0|C,Dog-4|C,Don-0|C,Fei-0|C,ICE106|C,ICE127|C,ICE130|C,ICE134|C,ICE138|C,ICE150|C,ICE152|C,ICE153|C,ICE29|C,ICE49|C,ICE50|C,ICE61|C,ICE63|C,ICE71|C,ICE72|C,ICE73|C,ICE75|C,ICE7|C,ICE91|C,ICE97|C,Kastel-1|C,Koch-1|C,Sha|C,Yeg-1|C,Ler-1|A,Ler-0|C
AT1G64960	24133195-24133317	24133299	G	SNP_EI	Ler-1|T
AT1G64960	24133195-24133317	24133322	T	SNP_EI	Ler-1|A
AT1G64960	24133195-24133317	24133323	C	SNP_EI	Ler-1|T
AT1G64970	24134841-24134909	24134839	C	SPLICE_SIGNAL_SNP	Ler-1|G
AT1G64970	24134841-24134909	24134859	C	SNP_EI	Ler-1|T
AT1G64970	24134841-24134909	24134881	T	SNP_EI	ICE112|C,ICE36|C,ICE70|C,Leo-1|C,Mer-6|C,Star-8|C,Vash-1|C,Xan-1|C
AT1G64970	24134841-24134909	24134908	C	SPLICE_SITE_SNP	ICE49|T,ICE50|T,Tuescha9|T,TueV13|T
AT1G65040	24162882-24162952	24162867	G	SNP_EI	Ler-1|T
AT1G65040	24162882-24162952	24162884	T	SPLICE_SITE_SNP	Agu-1|C,Bak-2|C,Bak-7|C,Cdm-0|C,Del-10|C,Dog-4|C,Don-0|C,Fei-0|C,HKT2.4|C,ICE102|C,ICE104|C,ICE106|C,ICE107|C,ICE111|C,ICE112|C,ICE119|C,ICE120|C,ICE127|C,ICE130|C,ICE134|C,ICE138|C,ICE150|C,ICE152|C,ICE153|C,ICE163|C,ICE181|C,ICE1|C,ICE212|C,ICE213|C,ICE216|C,ICE21|C,ICE226|C,ICE228|C,ICE29|C,ICE33|C,ICE36|C,ICE49|C,ICE50|C,ICE60|C,ICE61|C,ICE63|C,ICE70|C,ICE71|C,ICE72|C,ICE73|C,ICE75|C,ICE79|C,…
AT1G65040	24162882-24162952	24162904	G	SNP_EI	Koch-1|T
AT1G65040	24162882-24162952	24162906	G	SNP_EI	Agu-1|T,Cdm-0|T,ICE120|T,Xan-1|T
AT1G65040	24162882-24162952	24162913	T	SNP_EI	Koch-1|C
AT1G65040	24162882-24162952	24162922	G	SNP_EI	Koch-1|A
AT1G65040	24162882-24162952	24162949	G	BP_SNP	Koch-1|A
AT1G65040	24162882-24162952	24162961	C	SNP_EI	ICE33|A
AT1G65040	24163023-24163237	24163018	C	SNP_EI	Leo-1|G
AT1G65040	24163023-24163237	24163027	A	SPLICE_SIGNAL_SNP	Agu-1|G,Cdm-0|G,Del-10|G,Dog-4|G,Don-0|G,Fei-0|G,HKT2.4|G,ICE102|G,ICE104|G,ICE106|G,ICE107|G,ICE111|G,ICE112|G,ICE119|G,ICE120|G,ICE127|G,ICE130|G,ICE134|G,ICE138|G,ICE163|G,ICE181|G,ICE1|G,ICE212|G,ICE213|G,ICE216|G,ICE21|G,ICE33|G,ICE36|G,ICE50|G,ICE60|G,ICE61|G,ICE63|G,ICE70|G,ICE79|G,ICE91|G,ICE93|G,ICE97|G,ICE98|G,Istisu-1|G,Kastel-1|G,Lag2.2|G,Leo-1|G,Lerik1-3|G,Mer-6|G,Nie1-2|G,Ped-0|G,Pr…
AT1G65040	24163023-24163237	24163072	A	SNP_EI	ICE226|G,ICE228|G,ICE29|G,ICE33|G,ICE72|G,ICE7|G,Koch-1|G,Ped-0|G,Pra-6|G,Yeg-1|G,Ler-0|G
AT1G65040	24163023-24163237	24163099	G	SNP_EI	ICE70|T
AT1G65040	24163023-24163237	24163111	C	SNP_EI	ICE226|A,ICE228|A,ICE29|A,ICE33|A,ICE72|A,ICE7|A,Koch-1|A,Ped-0|A,Pra-6|A,Yeg-1|A,Ler-0|A
AT1G65040	24163023-24163237	24163114	T	SNP_EI	ICE226|C,ICE228|C,ICE29|C,ICE72|C,ICE7|C,Yeg-1|C,Ler-0|C
AT1G65040	24163023-24163237	24163210	T	SNP_EI	ICE29|G,ICE33|G,ICE72|G,ICE7|G,Koch-1|G,Yeg-1|G
AT1G65040	24163023-24163237	24163234	T	BP_SNP	Agu-1|C,Cdm-0|C,Don-0|C,ICE120|C,ICE29|C,ICE33|C,ICE36|C,ICE50|C,ICE72|C,ICE7|C,Koch-1|C,Ped-0|C,Pra-6|C,Qui-0|C,Xan-1|C,Yeg-1|C
AT1G65280	24246140-24246233	24246128	T	SNP_EI	Bak-2|C,Bak-7|C,Cdm-0|C,Del-10|C,Dog-4|C,Fei-0|C,HKT2.4|C,ICE102|C,ICE104|C,ICE120|C,ICE127|C,ICE130|C,ICE134|C,ICE138|C,ICE163|C,ICE212|C,ICE213|C,ICE216|C,ICE226|C,ICE228|C,ICE29|C,ICE33|C,ICE36|C,ICE49|C,ICE50|C,ICE60|C,ICE63|C,ICE70|C,ICE73|C,ICE79|C,ICE91|C,ICE97|C,ICE98|C,Lag2.2|C,Lerik1-3|C,Nemrut-1|C,Mer-6|C,Ped-0|C,Qui-0|C,Sha|C,Vash-1|C,WalhaesB4|C,Yeg-1|C,Ler-0|C
AT1G65280	24246140-24246233	24246147	C	SPLICE_SIGNAL_SNP	Bak-7|T
AT1G65280	24246140-24246233	24246162	T	SNP_EI	Dog-4|A,ICE104|A,ICE127|A,ICE130|A,ICE134|A,ICE138|A,ICE29|A,ICE36|A,ICE50|A,ICE63|A,ICE97|A,Lag2.2|A,Ped-0|A,Sha|A,Yeg-1|A,Ler-0|A
AT1G65280	24246140-24246233	24246187	C	SNP_EI	Bak-2|T,Bak-7|T,Cdm-0|T,Del-10|T,Dog-4|T,Fei-0|T,HKT2.4|T,ICE102|T,ICE104|T,ICE120|T,ICE130|T,ICE134|T,ICE138|T,ICE163|T,ICE212|T,ICE213|T,ICE216|T,ICE228|T,ICE29|T,ICE33|T,ICE36|T,ICE49|T,ICE50|T,ICE60|T,ICE61|T,ICE63|T,ICE70|T,ICE79|T,ICE91|T,ICE97|T,Lag2.2|T,Lerik1-3|T,Nemrut-1|T,Mer-6|T,Ped-0|T,Qui-0|T,Sha|T,Vash-1|T,WalhaesB4|T,Yeg-1|T,Ler-0|T
AT1G65280	24246140-24246233	24246196	T	SNP_EI	Bak-2|A,Bak-7|A,Cdm-0|A,Del-10|A,Fei-0|A,HKT2.4|A,ICE102|A,ICE104|A,ICE120|A,ICE127|A,ICE130|A,ICE134|A,ICE138|A,ICE163|A,ICE212|A,ICE213|A,ICE216|A,ICE226|A,ICE228|A,ICE29|A,ICE33|A,ICE36|A,ICE49|A,ICE50|A,ICE60|A,ICE61|A,ICE63|A,ICE70|A,ICE73|A,ICE79|A,ICE91|A,ICE97|A,ICE98|A,Lag2.2|A,Lerik1-3|A,Nemrut-1|A,Mer-6|A,Ped-0|A,Qui-0|A,Sha|A,Vash-1|A,WalhaesB4|A,Ler-0|A
AT1G65280	24246140-24246233	24246197	G	SNP_EI	Bak-2|A,Bak-7|A,Cdm-0|A,ICE102|A,ICE120|A,ICE163|A,ICE226|A,ICE228|A,ICE33|A,ICE70|A,ICE91|A,ICE98|A,Lerik1-3|A,Nemrut-1|A,Mer-6|A,Vash-1|A
AT1G65280	24246140-24246233	24246199	T	SNP_EI	Del-10|C,HKT2.4|C,ICE104|C,ICE130|C,ICE134|C,ICE138|C,ICE212|C,ICE213|C,ICE216|C,ICE36|C,ICE49|C,ICE50|C,ICE60|C,ICE61|C,ICE63|C,ICE73|C,ICE79|C,ICE97|C,Lag2.2|C,Ped-0|C,Qui-0|C,Sha|C,WalhaesB4|C,Ler-0|C
AT1G65280	24246140-24246233	24246200	G	SNP_EI	ICE104|A,ICE130|A,ICE134|A,ICE138|A,ICE63|A,ICE97|A,Lag2.2|A,Ped-0|A,Ler-0|A
AT1G65280	24246140-24246233	24246214	C	SNP_EI	Bak-2|T,Cdm-0|T,Del-10|T,Fei-0|T,HKT2.4|T,ICE120|T,ICE138|T,ICE163|T,ICE212|T,ICE213|T,ICE216|T,ICE226|T,ICE228|T,ICE33|T,ICE49|T,ICE60|T,ICE61|T,ICE70|T,ICE79|T,ICE98|T,Lerik1-3|T,Nemrut-1|T,Mer-6|T,Qui-0|T,Vash-1|T,WalhaesB4|T,Ler-0|T
AT1G65280	24246140-24246233	24246221	T	SNP_EI	Bak-2|G,Fei-0|G,HKT2.4|G,ICE138|G,ICE163|G,ICE212|G,ICE213|G,ICE228|G,ICE49|G,ICE60|G,ICE61|G,ICE70|G,ICE79|G,Lerik1-3|G,Nemrut-1|G,Mer-6|G,Qui-0|G,Vash-1|G,WalhaesB4|G,Ler-0|G
AT1G65280	24246140-24246233	24246233	G	SPLICE_SIGNAL_SNP	Dog-4|A,HKT2.4|A,ICE104|A,ICE127|A,ICE134|A,ICE138|A,ICE212|A,ICE213|A,ICE228|A,ICE29|A,ICE36|A,ICE50|A,ICE63|A,ICE79|A,ICE98|A,Mer-6|A,Qui-0|A,Vash-1|A,Ler-0|A
AT1G65280	24246140-24246233	24246235	A	SPLICE_SIGNAL_SNP	Dog-4|C,HKT2.4|C,ICE104|C,ICE127|C,ICE134|C,ICE138|C,ICE212|C,ICE213|C,ICE228|C,ICE29|C,ICE36|C,ICE50|C,ICE60|C,ICE63|C,ICE70|C,ICE79|C,ICE97|C,ICE98|C,Mer-6|C,Vash-1|C,Yeg-1|C,Ler-0|C
AT1G65280	24246140-24246233	24246241	A	SNP_EI	Bak-2|T,Bak-7|T,Cdm-0|T,Dog-4|T,HKT2.4|T,ICE104|T,ICE127|T,ICE130|T,ICE134|T,ICE138|T,ICE212|T,ICE213|T,ICE216|T,ICE228|T,ICE29|T,ICE33|T,ICE36|T,ICE49|T,ICE50|T,ICE60|T,ICE61|T,ICE63|T,ICE70|T,ICE79|T,ICE91|T,ICE97|T,ICE98|T,Lerik1-3|T,Mer-6|T,Ped-0|T,Qui-0|T,Vash-1|T,WalhaesB4|T,Yeg-1|T,Ler-0|T
AT1G66920	24966161-24966240	24966187	T	BP_SNP	Agu-1|C,Bak-7|C,Dog-4|C,Ey15-2|C,ICE104|C,ICE107|C,ICE119|C,ICE120|C,ICE138|C,ICE150|C,ICE153|C,ICE169|C,ICE173|C,ICE181|C,ICE212|C,ICE213|C,ICE21|C,ICE226|C,ICE29|C,ICE33|C,ICE36|C,ICE50|C,ICE70|C,ICE71|C,ICE72|C,ICE79|C,ICE93|C,Qui-0|C,Sha|C,Tuescha9|C
AT1G66920	24966161-24966240	24966217	G	SNP_EI	ICE107|A,ICE75|A
AT1G66920	24966161-24966240	24966220	A	SNP_EI	ICE75|G,Koch-1|G,TueWa1-2|G
AT1G66920	24966161-24966240	24966233	T	SPLICE_SIGNAL_SNP	ICE75|C,Koch-1|C,TueWa1-2|C
AT1G66920	24966161-24966240	24966237	T	SPLICE_SIGNAL_SNP	Dog-4|G,Don-0|G,Ey15-2|G,ICE111|G,ICE112|G,ICE138|G,ICE212|G,ICE213|G,ICE21|G,ICE33|G,ICE50|G,ICE73|G,ICE93|G,ICE98|G,Qui-0|G,Tuescha9|G,Vie-0|G
AT1G66970	24994814-24995007	24994799	C	SNP_EI	ICE21|A
AT1G66970	24994814-24995007	24994803	A	SNP_EI	Agu-1|G,Bak-2|G,Bak-7|G,Cdm-0|G,Del-10|G,Don-0|G,Ey15-2|G,Fei-0|G,HKT2.4|G,ICE104|G,ICE107|G,ICE111|G,ICE112|G,ICE120|G,ICE127|G,ICE130|G,ICE134|G,ICE138|G,ICE150|G,ICE152|G,ICE153|G,ICE163|G,ICE181|G,ICE1|G,ICE216|G,ICE21|G,ICE226|G,ICE228|G,ICE29|G,ICE33|G,ICE36|G,ICE49|G,ICE50|G,ICE60|G,ICE61|G,ICE63|G,ICE71|G,ICE72|G,ICE73|G,ICE75|G,ICE79|G,ICE7|G,ICE91|G,ICE92|G,ICE93|G,ICE97|G,ICE98|G,Istis…
AT1G66970	24994814-24995007	24994824	T	SPLICE_SIGNAL_SNP	Agu-1|G,Bak-2|G,Bak-7|G,Cdm-0|G,Don-0|G,Fei-0|G,ICE111|G,ICE112|G,ICE120|G,ICE138|G,ICE21|G,ICE33|G,ICE36|G,ICE71|G,ICE73|G,ICE7|G,ICE91|G,ICE92|G,ICE93|G,ICE97|G,ICE98|G,Lerik1-3|G,Mer-6|G,Nie1-2|G,Ped-0|G,Qui-0|G,TueSB30-3|G,Tuescha9|G,TueV13|G,WalhaesB4|G
AT1G66970	24994814-24995007	24994851	C	SNP_EI	HKT2.4|A,ICE127|A,ICE134|A,ICE212|A,ICE213|A,Xan-1|A
AT1G66970	24994814-24995007	24994881	A	SNP_EI	ICE150|G,ICE152|G,ICE153|G,ICE181|G
AT1G66970	24994814-24995007	24994882	C	SNP_EI	ICE107|G,Istisu-1|G,Leo-1|G,Vie-0|G
AT1G66970	24994814-24995007	24994887	T	SNP_EI	Agu-1|G,Bak-2|G,Bak-7|G,Cdm-0|G,Del-10|G,Don-0|G,Fei-0|G,HKT2.4|G,ICE107|G,ICE111|G,ICE112|G,ICE120|G,ICE127|G,ICE130|G,ICE134|G,ICE138|G,ICE150|G,ICE152|G,ICE153|G,ICE163|G,ICE181|G,ICE1|G,ICE212|G,ICE21|G,ICE226|G,ICE228|G,ICE29|G,ICE33|G,ICE36|G,ICE49|G,ICE50|G,ICE60|G,ICE61|G,ICE63|G,ICE71|G,ICE72|G,ICE73|G,ICE79|G,ICE7|G,ICE91|G,ICE92|G,ICE93|G,ICE97|G,ICE98|G,Istisu-1|G,Kastel-1|G,Lag2.2|G,…
AT1G66970	24994814-24995007	24994920	C	SNP_EI	ICE71|T,Nie1-2|T,TueSB30-3|T,WalhaesB4|T
AT1G66970	24994814-24995007	24994921	C	SNP_EI	ICE71|G,Nie1-2|G,TueSB30-3|G,WalhaesB4|G,Ler-1|A
AT1G66970	24994814-24995007	24994935	C	SNP_EI	Agu-1|G,Bak-2|G,Bak-7|G,Cdm-0|G,Ey15-2|G,Fei-0|G,HKT2.4|G,ICE104|G,ICE107|G,ICE111|G,ICE112|G,ICE120|G,ICE134|G,ICE138|G,ICE150|G,ICE152|G,ICE153|G,ICE163|G,ICE169|G,ICE173|G,ICE181|G,ICE1|G,ICE216|G,ICE21|G,ICE226|G,ICE228|G,ICE29|G,ICE33|G,ICE36|G,ICE60|G,ICE61|G,ICE63|G,ICE71|T,ICE72|G,ICE73|G,ICE79|G,ICE7|G,ICE91|G,ICE92|G,ICE93|G,ICE97|G,ICE98|G,Istisu-1|G,Kastel-1|G,Koch-1|G,Lag2.2|G,Leo-1|…
AT1G66970	24994814-24995007	24994942	G	SNP_EI	Del-10|C,ICE49|C,ICE71|A,Nie1-2|A,TueSB30-3|A,WalhaesB4|A
AT1G66970	24994814-24995007	24994959	A	SNP_EI	ICE71|G,Nie1-2|G,TueSB30-3|G,WalhaesB4|G
AT1G66970	24994814-24995007	24994973	T	SNP_EI	ICE71|G,Nie1-2|G,TueSB30-3|G,WalhaesB4|G
AT1G66970	24994814-24995007	24994978	T	SNP_EI	Agu-1|C,Bak-2|C,Bak-7|C,Cdm-0|C,Del-10|C,Don-0|C,Ey15-2|C,Fei-0|C,HKT2.4|C,ICE107|C,ICE111|C,ICE112|C,ICE120|C,ICE127|C,ICE130|C,ICE134|C,ICE138|C,ICE150|C,ICE152|C,ICE153|C,ICE163|C,ICE181|C,ICE212|C,ICE21|C,ICE226|C,ICE228|C,ICE29|C,ICE33|C,ICE36|C,ICE49|C,ICE50|C,ICE60|C,ICE61|C,ICE63|C,ICE71|C,ICE72|C,ICE73|C,ICE75|C,ICE79|C,ICE7|C,ICE91|C,ICE92|C,ICE93|C,ICE97|C,ICE98|C,Istisu-1|C,Kastel-1|C…
AT1G66970	24994814-24995007	24994989	C	SNP_EI	ICE71|A,Nie1-2|A,TueSB30-3|A,WalhaesB4|A
AT1G66970	24994814-24995007	24994998	G	SPLICE_SIGNAL_SNP	ICE107|A,Istisu-1|A,Leo-1|A,Vie-0|A
AT1G66970	24994814-24995007	24995004	T	SPLICE_SIGNAL_SNP	Don-0|G,Ped-0|G
AT1G67870	25450718-25450820	25450779	G	SNP_EI	ICE127|A,ICE130|A,ICE150|T,ICE152|T,ICE153|T,ICE1|T,ICE75|T,Sha|T
AT1G67870	25450718-25450820	25450783	G	SNP_EI	Del-10|A,Dog-4|A,ICE112|A,ICE138|A,ICE169|A,ICE173|A,ICE21|A,ICE226|A,ICE228|A,ICE29|A,ICE60|A,ICE63|A,ICE70|A,ICE79|A,ICE7|A,ICE91|A,ICE93|A,Koch-1|A,Nemrut-1|A,Yeg-1|A
AT1G68520	25710130-25710731	25710358	G	SNP_EI	Lag2.2|A
AT1G68520	25710130-25710731	25710398	C	SNP_EI	Del-10|T
AT1G68520	25710467-25710711	25710552	C	SNP_EI	ICE70|T,ICE75|T,Nemrut-1|T
AT1G68520	25710467-25710711	25710591	C	SNP_EI	ICE70|T,ICE75|T,Nemrut-1|T
AT1G68540	25720830-25720912	25720870	C	SNP_EI	Bak-2|T,Lag2.2|T,Vash-1|T
AT1G68540	25720830-25720912	25720877	G	SNP_EI	ICE181|T,ICE60|T,Ped-0|T
AT1G68720	25804929-25807375	25804927	A	SPLICE_SIGNAL_SNP	Dog-4|C
AT1G68720	25804929-25807375	25804941	G	SNP_EI	Bak-2|A,Bak-7|A,Cdm-0|A,Del-10|A,Ey15-2|A,Fei-0|A,HKT2.4|A,ICE102|A,ICE104|A,ICE106|A,ICE107|A,ICE111|A,ICE112|A,ICE119|A,ICE120|A,ICE127|A,ICE130|A,ICE134|A,ICE138|A,ICE150|A,ICE152|A,ICE153|A,ICE163|A,ICE1|A,ICE216|A,ICE29|A,ICE33|A,ICE71|A,ICE73|A,ICE75|A,ICE79|A,ICE7|A,ICE91|A,ICE92|A,ICE93|A,ICE97|A,ICE98|A,Istisu-1|A,Kastel-1|A,Koch-1|A,Leo-1|A,Lerik1-3|A,Mer-6|A,Nie1-2|A,Pra-6|A,Qui-0|A,Ru…
AT1G68720	25804929-25807375	25804993	G	SNP_EI	Bak-2|A,Bak-7|A,Cdm-0|A,Del-10|A,Ey15-2|A,Fei-0|A,HKT2.4|A,ICE102|A,ICE104|A,ICE106|A,ICE107|A,ICE111|A,ICE112|A,ICE119|A,ICE120|A,ICE127|A,ICE130|A,ICE134|A,ICE138|A,ICE150|A,ICE152|A,ICE153|A,ICE163|A,ICE1|A,ICE216|A,ICE29|A,ICE33|A,ICE71|A,ICE73|A,ICE75|A,ICE79|A,ICE7|A,ICE91|A,ICE92|A,ICE93|A,ICE97|A,ICE98|A,Istisu-1|A,Kastel-1|A,Koch-1|A,Leo-1|A,Lerik1-3|A,Mer-6|A,Nie1-2|A,Pra-6|A,Qui-0|A,Ru…
AT1G68720	25804929-25807375	25805099	A	SNP_EI	ICE21|T
AT1G68720	25804929-25807375	25805110	T	SNP_EI	ICE107|C,Ler-1|A
AT1G68720	25804929-25807375	25805228	A	SNP_EI	ICE73|C
AT1G68720	25804929-25807375	25805255	C	SNP_EI	Star-8|T
AT1G68720	25804929-25807375	25805275	T	SNP_EI	ICE60|C,ICE61|C,ICE70|C,ICE72|C,Nemrut-1|C
AT1G68720	25804929-25807375	25805311	G	SNP_EI	Ler-1|T
AT1G68720	25804929-25807375	25805316	G	SNP_EI	Ler-1|A
AT1G68720	25804929-25807375	25805324	C	SNP_EI	ICE106|T
AT1G68720	25804929-25807375	25805334	G	SNP_EI	ICE79|A,Tuescha9|A
AT1G68720	25804929-25807375	25805337	G	SNP_EI	Bak-2|A,Bak-7|A,Cdm-0|A,Del-10|A,Ey15-2|A,Fei-0|A,HKT2.4|A,ICE102|A,ICE104|A,ICE106|A,ICE107|A,ICE111|A,ICE112|A,ICE119|A,ICE120|A,ICE127|A,ICE130|A,ICE134|A,ICE138|A,ICE150|A,ICE152|A,ICE153|A,ICE1|A,ICE216|A,ICE29|A,ICE33|A,ICE71|A,ICE73|A,ICE75|A,ICE79|A,ICE7|A,ICE91|A,ICE92|A,ICE93|A,ICE97|A,ICE98|A,Istisu-1|A,Kastel-1|A,Koch-1|A,Leo-1|A,Lerik1-3|A,Mer-6|A,Nie1-2|A,Pra-6|A,Qui-0|A,Rue3-1-31|A…
AT1G68720	25804929-25807375	25805348	A	SNP_EI	Ler-1|G
AT1G68720	25804929-25807375	25805351	G	SNP_EI	Ler-1|T
AT1G68720	25804929-25807375	25805355	G	SNP_EI	Ler-1|C
AT1G68720	25804929-25807375	25805360	C	SNP_EI	Ler-1|T
AT1G68720	25804929-25807375	25805363	T	SNP_EI	Ler-1|C
AT1G68720	25804929-25807375	25805419	T	SNP_EI	Star-8|C
AT1G68720	25804929-25807375	25805426	T	SNP_EI	Ler-1|C
AT1G68720	25804929-25807375	25805438	A	SNP_EI	Bak-2|G,Bak-7|G,Cdm-0|G,Del-10|G,Ey15-2|G,Fei-0|G,HKT2.4|G,ICE102|G,ICE104|G,ICE106|G,ICE107|G,ICE111|G,ICE112|G,ICE119|G,ICE120|G,ICE127|G,ICE130|G,ICE134|G,ICE138|G,ICE150|G,ICE152|G,ICE153|G,ICE1|G,ICE216|G,ICE29|G,ICE33|G,ICE71|G,ICE73|G,ICE75|G,ICE79|G,ICE7|G,ICE91|G,ICE92|G,ICE93|G,ICE97|G,ICE98|G,Istisu-1|G,Kastel-1|G,Koch-1|G,Leo-1|G,Lerik1-3|G,Mer-6|G,Nie1-2|G,Pra-6|G,Qui-0|G,Rue3-1-31|G…
AT1G68720	25804929-25807375	25805475	C	SNP_EI	ICE93|T
AT1G68720	25804929-25807375	25805483	A	SNP_EI	Bak-2|G,Bak-7|G,Cdm-0|G,Del-10|G,Ey15-2|G,Fei-0|G,HKT2.4|G,ICE102|G,ICE104|G,ICE106|G,ICE107|G,ICE111|G,ICE112|G,ICE119|G,ICE120|G,ICE127|G,ICE130|G,ICE134|G,ICE138|G,ICE150|G,ICE152|G,ICE153|G,ICE1|G,ICE216|G,ICE29|G,ICE33|G,ICE71|G,ICE73|G,ICE75|G,ICE79|G,ICE7|G,ICE91|G,ICE92|G,ICE93|G,ICE97|G,ICE98|G,Istisu-1|G,Kastel-1|G,Koch-1|G,Leo-1|G,Lerik1-3|G,Mer-6|G,Nie1-2|G,Pra-6|G,Qui-0|G,Rue3-1-31|G…
AT1G68720	25804929-25807375	25805503	A	SNP_EI	Vie-0|G
AT1G68720	25804929-25807375	25805624	C	SNP_EI	Agu-1|A,Bak-2|A,Bak-7|A,Cdm-0|A,Del-10|A,Dog-4|A,Don-0|A,Ey15-2|A,Fei-0|A,HKT2.4|A,ICE102|A,ICE104|A,ICE106|A,ICE107|A,ICE111|A,ICE112|A,ICE119|A,ICE120|A,ICE127|A,ICE130|A,ICE134|A,ICE138|A,ICE150|A,ICE152|A,ICE153|A,ICE163|A,ICE169|A,ICE173|A,ICE181|A,ICE1|A,ICE212|A,ICE213|A,ICE216|A,ICE21|A,ICE226|A,ICE228|A,ICE29|A,ICE33|A,ICE36|A,ICE49|A,ICE50|A,ICE60|A,ICE61|A,ICE63|A,ICE70|A,ICE71|A,ICE72…
AT1G68720	25804929-25807375	25805637	A	SNP_EI	Kastel-1|T
AT1G68720	25804929-25807375	25805650	T	SNP_EI	Star-8|A
AT1G68720	25804929-25807375	25805667	C	SNP_EI	Ler-1|T
AT1G68720	25804929-25807375	25805673	C	SNP_EI	Agu-1|T
AT1G68720	25804929-25807375	25805702	C	SNP_EI	ICE21|T
AT1G68720	25804929-25807375	25805730	C	SNP_EI	ICE181|T,ICE212|T,ICE213|T,ICE21|T,ICE226|T,ICE228|T
AT1G68720	25804929-25807375	25805788	T	SNP_EI	Del-10|C
AT1G68720	25804929-25807375	25805798	T	SNP_EI	ICE49|A,ICE50|A
AT1G68720	25804929-25807375	25805933	G	SNP_EI	Leo-1|A
AT1G68720	25804929-25807375	25805938	C	SNP_EI	ICE7|A
AT1G68720	25804929-25807375	25805944	T	SNP_EI	Agu-1|A
AT1G68720	25804929-25807375	25805962	T	SNP_EI	ICE50|G
AT1G68720	25804929-25807375	25805975	A	SNP_EI	Ler-1|T
AT1G68720	25804929-25807375	25805981	C	SNP_EI	Ler-1|T
AT1G68720	25804929-25807375	25805986	T	SNP_EI	Ler-1|G
AT1G68720	25804929-25807375	25806008	A	SNP_EI	Ler-1|C
AT1G68720	25804929-25807375	25806014	T	SNP_EI	Ler-1|A
AT1G68720	25804929-25807375	25806016	G	SNP_EI	TueV13|A,Vie-0|A
AT1G68720	25804929-25807375	25806047	A	SNP_EI	Ler-1|G
AT1G68720	25804929-25807375	25806082	G	SNP_EI	Bak-2|A,Bak-7|A,Cdm-0|T,ICE106|T,ICE120|T,ICE127|T,ICE130|T,ICE134|T,ICE138|T,ICE150|T,ICE152|T,ICE153|T,ICE163|T,ICE1|T,ICE71|T,ICE73|T,ICE75|T,ICE79|T,ICE91|T,ICE92|T,Istisu-1|T,Koch-1|T,Leo-1|T,Mer-6|T,Nie1-2|T,Pra-6|T,Qui-0|T,Rue3-1-31|T,Sha|T,TueSB30-3|T,Tuescha9|T,Vash-1|T,WalhaesB4|T,Xan-1|T,Yeg-1|T,Ler-0|T
AT1G68720	25804929-25807375	25806202	T	SNP_EI	ICE181|C,ICE212|C,ICE213|C,ICE21|C,ICE226|C,ICE228|C
AT1G68720	25804929-25807375	25806295	G	SNP_EI	Ler-1|T
AT1G68720	25804929-25807375	25806305	G	SNP_EI	Bak-2|A,Bak-7|A,Cdm-0|A,Del-10|A,Ey15-2|A,Fei-0|A,HKT2.4|A,ICE102|A,ICE104|A,ICE106|A,ICE107|A,ICE111|A,ICE112|A,ICE119|A,ICE120|A,ICE127|A,ICE130|A,ICE134|A,ICE138|A,ICE150|A,ICE152|A,ICE153|A,ICE163|A,ICE1|A,ICE216|A,ICE29|A,ICE33|A,ICE71|A,ICE73|A,ICE75|A,ICE79|A,ICE7|A,ICE91|A,ICE92|A,ICE93|A,ICE97|A,ICE98|A,Istisu-1|A,Kastel-1|A,Koch-1|A,Leo-1|A,Lerik1-3|A,Mer-6|A,Nie1-2|A,Pra-6|A,Qui-0|A,Ru…
AT1G68720	25804929-25807375	25806333	A	SNP_EI	ICE127|T,ICE130|T,ICE134|T,ICE138|T,ICE150|T,ICE152|T,ICE153|T,ICE1|T,ICE71|T,ICE75|T,Koch-1|T,Sha|T,Yeg-1|T
AT1G68720	25804929-25807375	25806336	A	SNP_EI	Bak-2|G,Bak-7|G,Cdm-0|G,Del-10|G,Ey15-2|G,Fei-0|G,HKT2.4|G,ICE102|G,ICE104|G,ICE106|G,ICE107|G,ICE111|G,ICE112|G,ICE119|G,ICE120|G,ICE127|G,ICE130|G,ICE134|G,ICE138|G,ICE150|G,ICE152|G,ICE153|G,ICE163|G,ICE1|G,ICE216|G,ICE29|G,ICE33|G,ICE71|G,ICE73|G,ICE75|G,ICE79|G,ICE7|G,ICE91|G,ICE92|G,ICE93|G,ICE97|G,ICE98|G,Istisu-1|G,Kastel-1|G,Koch-1|G,Leo-1|G,Lerik1-3|G,Mer-6|G,Nie1-2|G,Pra-6|G,Qui-0|G,Ru…
AT1G68720	25804929-25807375	25806345	A	SNP_EI	Bak-2|G,Bak-7|G,Cdm-0|G,Del-10|G,Ey15-2|G,Fei-0|G,HKT2.4|G,ICE102|G,ICE104|G,ICE106|G,ICE107|G,ICE111|G,ICE112|G,ICE119|G,ICE120|G,ICE127|G,ICE130|G,ICE134|G,ICE138|G,ICE150|G,ICE152|G,ICE153|G,ICE1|G,ICE216|G,ICE29|G,ICE33|G,ICE71|G,ICE73|G,ICE75|G,ICE79|G,ICE7|G,ICE91|G,ICE92|G,ICE93|G,ICE97|G,ICE98|G,Istisu-1|G,Kastel-1|G,Koch-1|G,Leo-1|G,Lerik1-3|G,Mer-6|G,Nie1-2|G,Pra-6|G,Qui-0|G,Rue3-1-31|G…
AT1G68720	25804929-25807375	25806379	A	SNP_EI	Ler-1|G
AT1G68720	25804929-25807375	25806385	A	SNP_EI	Dog-4|T
AT1G68720	25804929-25807375	25806408	T	SNP_EI	Star-8|G
AT1G68720	25804929-25807375	25806428	C	SNP_EI	Dog-4|A
AT1G68720	25804929-25807375	25806456	C	SNP_EI	ICE102|T,ICE73|T
AT1G68720	25804929-25807375	25806472	G	SNP_EI	Bak-2|A,Bak-7|A,Cdm-0|A,Del-10|A,Ey15-2|A,Fei-0|A,HKT2.4|A,ICE102|A,ICE104|A,ICE106|A,ICE107|A,ICE111|A,ICE112|A,ICE119|A,ICE120|A,ICE127|A,ICE130|A,ICE134|A,ICE138|A,ICE150|A,ICE152|A,ICE153|A,ICE163|A,ICE1|A,ICE216|A,ICE29|A,ICE33|A,ICE71|A,ICE73|A,ICE75|A,ICE79|A,ICE7|A,ICE91|A,ICE92|A,ICE93|A,ICE97|A,ICE98|A,Istisu-1|A,Kastel-1|A,Koch-1|A,Leo-1|A,Lerik1-3|A,Mer-6|A,Nie1-2|A,Pra-6|A,Qui-0|A,Ru…
AT1G68720	25804929-25807375	25806641	A	SNP_EI	Bak-2|C,Bak-7|C,Cdm-0|C,Del-10|C,Ey15-2|C,Fei-0|C,HKT2.4|C,ICE102|C,ICE104|C,ICE106|C,ICE107|C,ICE111|C,ICE112|C,ICE119|C,ICE120|C,ICE127|C,ICE130|C,ICE134|C,ICE138|C,ICE150|C,ICE152|C,ICE153|C,ICE1|C,ICE216|C,ICE29|C,ICE33|C,ICE71|C,ICE73|C,ICE75|C,ICE79|C,ICE7|C,ICE91|C,ICE92|C,ICE93|C,ICE97|C,ICE98|C,Istisu-1|C,Kastel-1|C,Koch-1|C,Leo-1|C,Lerik1-3|C,Mer-6|C,Nie1-2|C,Pra-6|C,Qui-0|C,Rue3-1-31|C…
AT1G68720	25804929-25807375	25806651	T	SNP_EI	Nie1-2|A,Rue3-1-31|A,TueSB30-3|A,WalhaesB4|A
AT1G68720	25804929-25807375	25806663	G	SNP_EI	Dog-4|T
AT1G68720	25804929-25807375	25806717	C	SNP_EI	ICE106|T,ICE163|T,Istisu-1|T,Pra-6|T,Xan-1|T
AT1G68720	25804929-25807375	25806763	A	SNP_EI	Star-8|G
AT1G68720	25804929-25807375	25806774	T	SNP_EI	Dog-4|C
AT1G68720	25804929-25807375	25806793	G	SNP_EI	TueWa1-2|C
AT1G68720	25804929-25807375	25806808	T	SNP_EI	Bak-2|A,Bak-7|A,Cdm-0|A,Del-10|A,Ey15-2|A,Fei-0|A,HKT2.4|A,ICE102|A,ICE104|A,ICE106|A,ICE107|A,ICE111|A,ICE112|A,ICE119|A,ICE120|A,ICE127|A,ICE130|A,ICE134|A,ICE138|A,ICE150|A,ICE152|A,ICE153|A,ICE1|A,ICE216|A,ICE29|A,ICE33|A,ICE71|A,ICE73|A,ICE75|A,ICE79|A,ICE7|A,ICE91|A,ICE92|A,ICE93|A,ICE97|A,ICE98|A,Istisu-1|A,Kastel-1|A,Koch-1|A,Leo-1|A,Lerik1-3|A,Mer-6|A,Nie1-2|A,Pra-6|A,Qui-0|A,Rue3-1-31|A…
AT1G68720	25804929-25807375	25806817	G	SNP_EI	Bak-2|C,Bak-7|C,Cdm-0|C,Del-10|C,Ey15-2|C,Fei-0|C,HKT2.4|C,ICE102|C,ICE104|C,ICE106|C,ICE107|C,ICE111|C,ICE112|C,ICE119|C,ICE120|C,ICE127|C,ICE130|C,ICE134|C,ICE138|C,ICE150|C,ICE152|C,ICE153|C,ICE1|C,ICE216|C,ICE29|C,ICE33|C,ICE71|C,ICE73|C,ICE75|C,ICE79|C,ICE7|C,ICE91|C,ICE92|C,ICE93|C,ICE97|C,ICE98|C,Istisu-1|C,Kastel-1|C,Koch-1|C,Leo-1|C,Lerik1-3|C,Mer-6|C,Nie1-2|C,Pra-6|C,Qui-0|C,Rue3-1-31|C…
AT1G68720	25804929-25807375	25806830	C	SNP_EI	ICE79|G
AT1G68720	25804929-25807375	25806833	A	SNP_EI	Dog-4|C
AT1G68720	25804929-25807375	25807005	G	SNP_EI	Dog-4|C
AT1G68720	25804929-25807375	25807040	C	SNP_EI	ICE112|T
AT1G68720	25804929-25807375	25807078	G	SNP_EI	Bak-2|A,Bak-7|A,Cdm-0|A,Del-10|A,Ey15-2|A,Fei-0|A,HKT2.4|A,ICE102|A,ICE104|A,ICE106|A,ICE107|A,ICE111|A,ICE112|A,ICE119|A,ICE120|A,ICE127|A,ICE130|A,ICE134|A,ICE138|A,ICE150|A,ICE152|A,ICE153|A,ICE1|A,ICE216|A,ICE29|A,ICE33|A,ICE71|A,ICE73|A,ICE75|A,ICE79|A,ICE7|A,ICE91|A,ICE92|A,ICE93|A,ICE97|A,ICE98|A,Istisu-1|A,Kastel-1|A,Koch-1|A,Leo-1|A,Lerik1-3|A,Mer-6|A,Nie1-2|A,Pra-6|A,Qui-0|A,Rue3-1-31|A…
AT1G68720	25804929-25807375	25807089	C	SNP_EI	TueWa1-2|T
AT1G68720	25804929-25807375	25807112	G	SNP_EI	TueWa1-2|C
AT1G68720	25804929-25807375	25807156	C	SNP_EI	Vie-0|T
AT1G68720	25804929-25807375	25807175	A	SNP_EI	Lag2.2|T
AT1G68720	25804929-25807375	25807265	C	SNP_EI	Ler-0|T
AT1G68720	25804929-25807375	25807299	G	SNP_EI	ICE181|T,ICE212|T,ICE213|T,ICE21|T,ICE226|T,ICE228|T
AT1G68720	25804929-25807375	25807357	G	SNP_EI	Dog-4|T,ICE60|A,ICE61|A,ICE70|A,ICE72|A,Nemrut-1|A
AT1G68720	25804929-25807375	25807377	C	SPLICE_SIGNAL_SNP	Star-8|T
AT1G69040	25958959-25959068	25958964	G	SPLICE_SIGNAL_SNP	Agu-1|A,Don-0|A,Fei-0|A,Qui-0|A
AT1G69040	25958959-25959068	25958985	T	SNP_EI	Agu-1|C,Don-0|C,Fei-0|C,Qui-0|C
AT1G69040	25958959-25959068	25958994	T	SNP_EI	Agu-1|C,Don-0|C,Fei-0|C,Qui-0|C
AT1G69040	25958959-25959068	25959012	C	SNP_EI	Agu-1|A,Don-0|A,Fei-0|A,Qui-0|A
AT1G69040	25958959-25959068	25959030	A	SNP_EI	Agu-1|T,Don-0|T,Fei-0|T,Qui-0|T
AT1G69040	25958959-25959068	25959051	T	SNP_EI	Del-10|C,ICE120|C,ICE92|C,ICE97|C,ICE98|C,Nie1-2|C,WalhaesB4|C
AT1G69040	25959137-25959210	25959144	G	SPLICE_SIGNAL_SNP	Agu-1|A,Don-0|A,Fei-0|A,Qui-0|A
AT1G69040	25959137-25959210	25959213	T	SNP_EI	Agu-1|C,Don-0|C,Fei-0|C,Qui-0|C
AT1G69250	26034711-26034810	26034717	A	SPLICE_SIGNAL_SNP	Fei-0|G
AT1G69250	26034711-26034810	26034759	T	SNP_EI	Fei-0|C
AT1G69250	26034711-26034810	26034762	A	SNP_EI	Fei-0|C
AT1G69250	26034711-26034810	26034764	G	SNP_EI	Fei-0|C
AT1G69250	26034711-26034810	26034770	C	SNP_EI	Fei-0|G
AT1G69250	26034711-26034810	26034780	A	SNP_EI	Fei-0|T
AT1G69250	26034711-26034810	26034781	C	SNP_EI	Fei-0|T
AT1G69450	26108492-26108596	26108491	G	SPLICE_SIGNAL_SNP	Ler-1|A
AT1G69450	26108492-26108596	26108533	C	SNP_EI	Ped-0|T
AT1G69450	26108492-26108596	26108569	T	SNP_EI	ICE75|C,Yeg-1|C
AT1G69450	26108492-26108596	26108593	T	BP_SNP	ICE75|G,Ped-0|G,Pra-6|G,Yeg-1|G
AT1G69450	26108492-26108596	26108596	G	BP_SNP	ICE75|A,Yeg-1|A
AT1G69450	26108492-26108596	26108603	A	SNP_EI	Ler-1|G
AT1G69450	26108492-26108596	26108611	T	SNP_EI	ICE1|C
AT1G69450	26109648-26109840	26109731	A	SNP_EI	Del-10|G,ICE106|G,ICE107|G,ICE111|G,ICE120|G,ICE127|G,ICE21|G,ICE33|G,ICE72|G,ICE79|G,ICE92|G,ICE97|G,Koch-1|G,Lag2.2|G,Leo-1|G,Lerik1-3|G,Ped-0|G,Pra-6|G,Rue3-1-31|G,Tuescha9|G
AT1G69450	26109648-26109840	26109737	G	SNP_EI	Ped-0|A
AT1G69450	26109648-26109840	26109738	A	SNP_EI	Ler-1|G
AT1G69450	26109648-26109840	26109748	T	SNP_EI	Ped-0|G
AT1G69450	26109648-26109840	26109752	C	SNP_EI	ICE75|G,Ped-0|G,Pra-6|G,Yeg-1|G
AT1G69450	26109648-26109840	26109773	T	SNP_EI	Pra-6|G
AT1G69450	26109648-26109840	26109781	T	SNP_EI	ICE181|A
AT1G69450	26109648-26109840	26109782	A	SNP_EI	ICE75|C,Ped-0|T,Yeg-1|C
[truncated: 6,325 more rows]

## Sheet: ST7
Supplemental Table 7. Ecotype SNPs that affect the exitron (EI) splicing signal score when compared to Arabidopsis thaliana Col-0 ecotype
Gene_id	EI_coordinates	SNP_coordinate	Reference base	5' or 3' splice signal	SNP location	Ecotype|PWM_score|SNP_effect
AT1G03350	823581-824012	823582	C	3SS	SPLICE_SITE_SNP	Col-0|65.20|NA,Fei-0|59.32|DOWN,ICE104|59.32|DOWN,ICE107|59.32|DOWN,ICE50|59.32|DOWN,ICE93|59.32|DOWN
AT1G07520	2310406-2311355	2310405	A	3SS	SPLICE_SIGNAL_SNP	Col-0|56.60|NA,Don-0|54.41|DOWN
AT1G09070	2928355-2928419	2928356	A	5SS	SPLICE_SITE_SNP	Col-0|57.41|NA,Agu-1|65.10|UP,Bak-2|65.10|UP,Bak-7|65.10|UP,Cdm-0|65.10|UP,Del-10|65.10|UP,Dog-4|65.10|UP,Don-0|65.10|UP,Ey15-2|65.10|UP,Fei-0|65.10|UP,HKT2.4|65.10|UP,ICE102|65.10|UP,ICE104|65.10|UP,ICE106|65.10|UP,ICE107|65.10|UP,ICE111|65.10|UP,ICE112|65.10|UP,ICE119|65.10|UP,ICE120|65.10|UP,ICE127|65.10|UP,ICE130|65.10|UP,ICE134|65.10|UP,ICE138|65.10|UP,ICE150|65.10|UP,ICE152|65.10|UP,ICE153|…
AT1G11680	3939753-3939931	3939760	C	5SS	SPLICE_SIGNAL_SNP	Col-0|60.37|NA,Dog-4|64.72|UP,ICE107|64.72|UP,ICE150|64.72|UP,ICE152|64.72|UP,ICE33|64.72|UP,ICE92|64.72|UP,Lag2.2|64.72|UP,Nemrut-1|64.72|UP,Rue3-1-31|64.72|UP,TueSB30-3|64.72|UP,Xan-1|64.72|UP
AT1G11770	3976467-3976529	3976469	T	5SS	SPLICE_SITE_SNP	Col-0|58.28|NA,Agu-1|50.59|DOWN,Bak-2|50.59|DOWN,Bak-7|50.59|DOWN,Cdm-0|50.59|DOWN,Del-10|50.59|DOWN,Dog-4|50.59|DOWN,Don-0|50.59|DOWN,Ey15-2|50.59|DOWN,Fei-0|50.59|DOWN,HKT2.4|50.59|DOWN,ICE102|50.59|DOWN,ICE104|50.59|DOWN,ICE106|50.59|DOWN,ICE107|50.59|DOWN,ICE111|50.59|DOWN,ICE112|50.59|DOWN,ICE119|50.59|DOWN,ICE120|50.59|DOWN,ICE127|50.59|DOWN,ICE130|50.59|DOWN,ICE134|50.59|DOWN,ICE138|50.59|…
AT1G11770	3976467-3976529	3976528	G	3SS	SPLICE_SITE_SNP	Col-0|61.74|NA,Fei-0|55.86|DOWN
AT1G12780	4356821-4356910	4356911	T	5SS	SPLICE_SIGNAL_SNP	Col-0|67.38|NA,Bak-7|62.31|DOWN,Ey15-2|62.31|DOWN,ICE163|62.31|DOWN,ICE169|62.31|DOWN,ICE173|62.31|DOWN,ICE181|62.31|DOWN,ICE1|62.31|DOWN,ICE212|62.31|DOWN,ICE213|62.31|DOWN,ICE226|62.31|DOWN,ICE228|62.31|DOWN,ICE29|62.31|DOWN,ICE36|62.31|DOWN,ICE63|62.31|DOWN,ICE7|62.31|DOWN,Nemrut-1|62.31|DOWN
AT1G14230	4863121-4863190	4863122	G	5SS	SPLICE_SITE_SNP	Col-0|69.32|NA,Qui-0|61.62|DOWN
AT1G14640	5024040-5024109	5024043	A	5SS	SPLICE_SIGNAL_SNP	Col-0|70.28|NA,Qui-0|67.37|DOWN
AT1G15080	5188138-5188266	5188265	G	3SS	SPLICE_SITE_SNP	Col-0|65.24|NA,Bak-2|59.35|DOWN,Del-10|59.35|DOWN,Don-0|59.35|DOWN,Fei-0|59.35|DOWN,ICE119|59.35|DOWN,ICE127|59.35|DOWN,ICE130|59.35|DOWN,ICE134|59.35|DOWN,ICE138|59.35|DOWN,ICE163|59.35|DOWN,ICE181|59.35|DOWN,ICE21|59.35|DOWN,ICE226|59.35|DOWN,ICE228|59.35|DOWN,ICE33|59.35|DOWN,ICE49|59.35|DOWN,ICE60|59.35|DOWN,ICE61|59.35|DOWN,ICE63|59.35|DOWN,ICE70|59.35|DOWN,ICE71|59.35|DOWN,ICE72|59.35|DOWN,…
AT1G15510	5329660-5331576	5329668	G	5SS	SPLICE_SIGNAL_SNP	Col-0|60.45|NA,Istisu-1|65.10|UP,Xan-1|65.10|UP
AT1G16110	5520319-5520401	5520320	G	5SS	SPLICE_SITE_SNP	Col-0|67.74|NA,Don-0|60.05|DOWN,ICE49|60.05|DOWN,ICE50|60.05|DOWN,ICE79|60.05|DOWN,ICE93|60.05|DOWN,Ped-0|60.05|DOWN,Qui-0|60.05|DOWN
AT1G18900	6530002-6531273	6530008	A	5SS	SPLICE_SIGNAL_SNP	Col-0|68.95|NA,Don-0|70.95|UP,ICE106|70.95|UP,ICE119|70.95|UP,ICE127|70.95|UP,ICE130|70.95|UP,ICE134|70.95|UP,ICE138|70.95|UP,ICE150|70.95|UP,ICE152|70.95|UP,ICE153|70.95|UP,ICE181|70.95|UP,ICE1|70.95|UP,ICE49|70.95|UP,ICE50|70.95|UP,ICE60|70.95|UP,ICE61|70.95|UP,ICE70|70.95|UP,ICE71|70.95|UP,ICE72|70.95|UP,ICE75|70.95|UP,ICE79|70.95|UP,Koch-1|70.95|UP,Qui-0|70.95|UP,Sha|70.95|UP,Ler-0|70.95|UP
AT1G20180	6997265-6997359	6997271	T	5SS	SPLICE_SIGNAL_SNP	Col-0|67.71|NA,Del-10|65.71|DOWN,Star-8|65.71|DOWN,WalhaesB4|65.71|DOWN
AT1G21460	7512553-7512653	7512651	A	5SS	SPLICE_SITE_SNP	Col-0|70.44|NA,ICE7|62.75|DOWN
AT1G21500	7530163-7530254	7530248	C	5SS	SPLICE_SIGNAL_SNP	Col-0|60.85|NA,Ler-1|57.94|DOWN
AT1G21670	7610795-7611641	7611639	A	3SS	SPLICE_SITE_SNP	Col-0|61.05|NA,ICE130|55.17|DOWN,ICE150|55.17|DOWN,ICE152|55.17|DOWN,ICE153|55.17|DOWN,ICE60|55.17|DOWN,Sha|55.17|DOWN
AT1G21920	7705526-7705642	7705531	A	3SS	SPLICE_SIGNAL_SNP	Col-0|63.74|NA,Agu-1|61.62|DOWN,Bak-2|61.62|DOWN,Bak-7|61.62|DOWN,Del-10|61.62|DOWN,Ey15-2|61.62|DOWN,Fei-0|61.62|DOWN,ICE106|61.62|DOWN,ICE107|61.62|DOWN,ICE21|61.62|DOWN,ICE226|61.62|DOWN,ICE228|61.62|DOWN,ICE49|61.62|DOWN,ICE50|61.62|DOWN,ICE63|61.62|DOWN,ICE92|61.62|DOWN,ICE97|61.62|DOWN,ICE98|61.62|DOWN,Istisu-1|61.62|DOWN,Kastel-1|61.62|DOWN,Lag2.2|61.62|DOWN,Lerik1-3|61.62|DOWN,Nemrut-1|61…
AT1G23740	8398954-8399051	8398957	A	3SS	SPLICE_SIGNAL_SNP	Col-0|63.58|NA,Ler-1|60.24|DOWN
AT1G28430	9993511-9993596	9993597	T	5SS	SPLICE_SIGNAL_SNP	Col-0|67.78|NA,Cdm-0|64.81|DOWN,Ey15-2|64.81|DOWN,HKT2.4|64.81|DOWN,ICE106|64.81|DOWN,ICE127|64.81|DOWN,ICE130|64.81|DOWN,ICE134|64.81|DOWN,ICE150|64.81|DOWN,ICE152|64.81|DOWN,ICE153|64.81|DOWN,ICE212|64.81|DOWN,ICE213|64.81|DOWN,ICE216|64.81|DOWN,ICE21|64.81|DOWN,ICE226|64.81|DOWN,ICE228|64.81|DOWN,ICE70|64.81|DOWN,ICE71|64.81|DOWN,ICE72|64.81|DOWN,ICE73|64.81|DOWN,ICE75|64.81|DOWN,ICE79|64.81|D…
AT1G34160	12441574-12441681	12441573	C	5SS	SPLICE_SIGNAL_SNP	Col-0|67.27|NA,ICE71|70.17|UP,ICE75|70.17|UP
AT1G34200	12456723-12456805	12456724	A	5SS	SPLICE_SITE_SNP	Col-0|65.42|NA,Ler-1|57.72|DOWN
AT1G35670	13205813-13205943	13205942	G	3SS	SPLICE_SITE_SNP	Col-0|63.96|NA,Ped-0|58.08|DOWN
AT1G35710	13223082-13223743	13223081	A	5SS	SPLICE_SIGNAL_SNP	Col-0|66.63|NA,Agu-1|63.66|DOWN,Bak-2|63.66|DOWN,Bak-7|63.66|DOWN,Dog-4|63.66|DOWN,Don-0|63.66|DOWN,Ey15-2|63.66|DOWN,Fei-0|63.66|DOWN,HKT2.4|63.66|DOWN,ICE106|63.66|DOWN,ICE107|63.66|DOWN,ICE111|63.66|DOWN,ICE112|63.66|DOWN,ICE119|63.66|DOWN,ICE120|63.66|DOWN,ICE150|63.66|DOWN,ICE152|63.66|DOWN,ICE153|63.66|DOWN,ICE163|63.66|DOWN,ICE169|63.66|DOWN,ICE173|63.66|DOWN,ICE181|63.66|DOWN,ICE1|63.66|D…
AT1G43710	16487784-16487878	16487789	A	3SS	SPLICE_SIGNAL_SNP	Col-0|63.46|NA,Bak-7|61.34|DOWN,ICE102|61.34|DOWN,ICE111|61.34|DOWN,ICE150|61.34|DOWN,ICE152|61.34|DOWN,ICE153|61.34|DOWN,Istisu-1|61.34|DOWN,Lag2.2|61.34|DOWN,Xan-1|61.34|DOWN
AT1G47250	17320802-17320869	17320806	A	5SS	SPLICE_SIGNAL_SNP	Col-0|66.30|NA,Agu-1|63.76|DOWN,Bak-2|63.76|DOWN,Bak-7|63.76|DOWN,Del-10|63.76|DOWN,Dog-4|63.76|DOWN,Ey15-2|63.76|DOWN,Fei-0|63.76|DOWN,HKT2.4|63.76|DOWN,ICE102|63.76|DOWN,ICE104|63.76|DOWN,ICE106|63.76|DOWN,ICE111|63.76|DOWN,ICE112|63.76|DOWN,ICE119|63.76|DOWN,ICE181|63.76|DOWN,ICE1|63.76|DOWN,ICE212|63.76|DOWN,ICE213|63.76|DOWN,ICE216|63.76|DOWN,ICE226|63.76|DOWN,ICE228|63.76|DOWN,ICE29|63.76|D…
AT1G47490	17424846-17424929	17424852	G	5SS	SPLICE_SIGNAL_SNP	Col-0|51.56|NA,Lag2.2|53.76|UP,Vie-0|53.76|UP
AT1G53790	20080346-20080458	20080351	A	3SS	SPLICE_SIGNAL_SNP	Col-0|62.94|NA,ICE21|60.76|DOWN,Qui-0|60.76|DOWN
AT1G53830	20099540-20099702	20099699	G	3SS	SPLICE_SIGNAL_SNP	Col-0|60.20|NA,ICE106|63.33|UP
AT1G58100	21512981-21513045	21512983	A	3SS	SPLICE_SITE_SNP	Col-0|58.73|NA,Ler-1|52.84|DOWN
AT1G58180	21538029-21538132	21538133	T	5SS	SPLICE_SIGNAL_SNP	Col-0|66.53|NA,Cdm-0|63.56|DOWN,ICE29|63.56|DOWN,Ped-0|63.56|DOWN,Pra-6|63.56|DOWN
AT1G60560	22309321-22309401	22309322	C	3SS	SPLICE_SITE_SNP	Col-0|67.59|NA,Don-0|61.71|DOWN,Ey15-2|61.71|DOWN,ICE120|61.71|DOWN,ICE134|61.71|DOWN,ICE181|61.71|DOWN,ICE1|61.71|DOWN,ICE49|61.71|DOWN,ICE60|61.71|DOWN,ICE61|61.71|DOWN,ICE71|61.71|DOWN,ICE72|61.71|DOWN,ICE75|61.71|DOWN,ICE79|61.71|DOWN,ICE98|61.71|DOWN,Nemrut-1|61.71|DOWN,Qui-0|61.71|DOWN,TueWa1-2|61.71|DOWN,Vie-0|61.71|DOWN,WalhaesB4|61.71|DOWN
AT1G61170	22550072-22550161	22550072	C	5SS	SPLICE_SIGNAL_SNP	Col-0|57.73|NA,Agu-1|61.55|UP,Bak-2|61.55|UP,Bak-7|61.55|UP,Del-10|61.55|UP,Dog-4|61.55|UP,Don-0|61.55|UP,Ey15-2|61.55|UP,Fei-0|61.55|UP,HKT2.4|61.55|UP,ICE102|61.55|UP,ICE104|61.55|UP,ICE106|61.55|UP,ICE107|61.55|UP,ICE111|61.55|UP,ICE112|61.55|UP,ICE119|61.55|UP,ICE120|61.55|UP,ICE127|61.55|UP,ICE130|61.55|UP,ICE134|61.55|UP,ICE138|61.55|UP,ICE150|61.55|UP,ICE152|61.55|UP,ICE153|61.55|UP,ICE163…
AT1G61730	22794320-22794446	22794442	G	5SS	SPLICE_SIGNAL_SNP	Col-0|57.20|NA,Bak-7|59.49|UP,Ey15-2|59.49|UP,ICE112|59.49|UP,ICE127|59.49|UP,ICE169|59.49|UP,ICE173|59.49|UP,ICE212|59.49|UP,ICE213|59.49|UP,ICE21|59.49|UP,ICE49|59.49|UP,ICE61|59.49|UP,ICE72|59.49|UP,ICE7|59.49|UP,Mer-6|59.49|UP,Ped-0|59.49|UP,Star-8|59.49|UP,TueV13|59.49|UP,Vash-1|59.49|UP
AT1G62010	22916260-22916396	22916391	C	3SS	SPLICE_SIGNAL_SNP	Col-0|67.59|NA,ICE104|70.06|UP,ICE112|70.06|UP,ICE63|70.06|UP,ICE92|70.06|UP
AT1G63230	23451669-23451757	23451668	A	5SS	SPLICE_SIGNAL_SNP	Col-0|71.12|NA,Bak-7|68.15|DOWN,ICE112|68.15|DOWN,ICE130|68.15|DOWN,ICE138|68.15|DOWN,ICE150|68.15|DOWN,ICE152|68.15|DOWN,ICE153|68.15|DOWN,ICE50|68.15|DOWN,ICE71|68.15|DOWN,Sha|68.15|DOWN,Tuescha9|68.15|DOWN,TueV13|68.15|DOWN
AT1G63230	23451669-23451757	23451670	G	5SS	SPLICE_SITE_SNP	Col-0|71.12|NA,Bak-7|65.00|DOWN,ICE112|65.00|DOWN,ICE130|65.00|DOWN,ICE138|65.00|DOWN,ICE150|65.00|DOWN,ICE152|65.00|DOWN,ICE153|65.00|DOWN,ICE50|65.00|DOWN,ICE71|65.00|DOWN,ICE73|65.00|DOWN,Sha|65.00|DOWN,Tuescha9|65.00|DOWN,TueV13|65.00|DOWN
AT1G63630	23587415-23587549	23587548	G	3SS	SPLICE_SITE_SNP	Col-0|66.98|NA,Bak-2|61.10|DOWN,Bak-7|61.10|DOWN,Del-10|61.10|DOWN,Dog-4|61.10|DOWN,Don-0|61.10|DOWN,HKT2.4|61.10|DOWN,ICE102|61.10|DOWN,ICE107|61.10|DOWN,ICE111|61.10|DOWN,ICE112|61.10|DOWN,ICE120|61.10|DOWN,ICE130|61.10|DOWN,ICE138|61.10|DOWN,ICE150|61.10|DOWN,ICE152|61.10|DOWN,ICE153|61.10|DOWN,ICE169|61.10|DOWN,ICE173|61.10|DOWN,ICE29|61.10|DOWN,ICE33|61.10|DOWN,ICE36|61.10|DOWN,ICE60|61.10|D…
AT1G64190	23826134-23826214	23826213	G	5SS	SPLICE_SITE_SNP	Col-0|66.59|NA,Ler-1|58.89|DOWN
AT1G64970	24134841-24134909	24134908	C	5SS	SPLICE_SITE_SNP	Col-0|58.44|NA,ICE49|50.75|DOWN,ICE50|50.75|DOWN,Tuescha9|50.75|DOWN,TueV13|50.75|DOWN
AT1G65040	24162882-24162952	24162884	T	3SS	SPLICE_SITE_SNP	Col-0|65.65|NA,Agu-1|59.77|DOWN,Bak-2|59.77|DOWN,Bak-7|59.77|DOWN,Cdm-0|59.77|DOWN,Del-10|59.77|DOWN,Dog-4|59.77|DOWN,Don-0|59.77|DOWN,Fei-0|59.77|DOWN,HKT2.4|59.77|DOWN,ICE102|59.77|DOWN,ICE104|59.77|DOWN,ICE106|59.77|DOWN,ICE107|59.77|DOWN,ICE111|59.77|DOWN,ICE112|59.77|DOWN,ICE119|59.77|DOWN,ICE120|59.77|DOWN,ICE127|59.77|DOWN,ICE130|59.77|DOWN,ICE134|59.77|DOWN,ICE138|59.77|DOWN,ICE150|59.77|…
AT1G66920	24966161-24966240	24966237	T	5SS	SPLICE_SIGNAL_SNP	Col-0|71.00|NA,Dog-4|68.10|DOWN,Don-0|68.10|DOWN,Ey15-2|68.10|DOWN,ICE111|68.10|DOWN,ICE112|68.10|DOWN,ICE138|68.10|DOWN,ICE212|68.10|DOWN,ICE213|68.10|DOWN,ICE21|68.10|DOWN,ICE33|68.10|DOWN,ICE50|68.10|DOWN,ICE73|68.10|DOWN,ICE93|68.10|DOWN,ICE98|68.10|DOWN,Qui-0|68.10|DOWN,Tuescha9|68.10|DOWN,Vie-0|68.10|DOWN
AT1G66970	24994814-24995007	24995004	T	5SS	SPLICE_SIGNAL_SNP	Col-0|66.99|NA,Don-0|59.30|DOWN,Ped-0|59.30|DOWN
AT1G69500	26125273-26125347	26125345	A	3SS	SPLICE_SITE_SNP	Col-0|63.83|NA,ICE49|57.95|DOWN,ICE50|57.95|DOWN
AT1G71691	26949777-26949858	26949778	C	3SS	SPLICE_SITE_SNP	Col-0|62.30|NA,Agu-1|56.42|DOWN,Bak-2|56.42|DOWN,Bak-7|56.42|DOWN,Don-0|56.42|DOWN,ICE102|56.42|DOWN,ICE111|56.42|DOWN,ICE130|56.42|DOWN,ICE138|56.42|DOWN,ICE29|56.42|DOWN,ICE49|56.42|DOWN,ICE50|56.42|DOWN,ICE98|56.42|DOWN,Lag2.2|56.42|DOWN,Leo-1|56.42|DOWN,Mer-6|56.42|DOWN,Ped-0|56.42|DOWN,Pra-6|56.42|DOWN,Yeg-1|56.42|DOWN
AT1G71720	26984215-26984282	26984280	A	3SS	SPLICE_SITE_SNP	Col-0|66.37|NA,Cdm-0|60.48|DOWN,Ey15-2|60.48|DOWN,HKT2.4|60.48|DOWN,ICE104|60.48|DOWN,ICE106|60.48|DOWN,ICE107|60.48|DOWN,ICE112|60.48|DOWN,ICE119|60.48|DOWN,ICE29|60.48|DOWN,ICE91|60.48|DOWN,ICE92|60.48|DOWN,ICE93|60.48|DOWN,ICE97|60.48|DOWN,Lag2.2|60.48|DOWN,Nie1-2|60.48|DOWN,Pra-6|60.48|DOWN,Qui-0|60.48|DOWN,TueSB30-3|60.48|DOWN,WalhaesB4|60.48|DOWN
AT1G72680	27359924-27359990	27359926	T	3SS	SPLICE_SITE_SNP	Col-0|59.71|NA,ICE36|53.83|DOWN,ICE79|53.83|DOWN
AT1G72830	27406250-27406326	27406325	C	5SS	SPLICE_SITE_SNP	Col-0|69.55|NA,Agu-1|61.86|DOWN,Bak-7|61.86|DOWN,Cdm-0|61.86|DOWN,Dog-4|61.86|DOWN,Don-0|61.86|DOWN,Ey15-2|61.86|DOWN,Fei-0|61.86|DOWN,HKT2.4|61.86|DOWN,ICE102|61.86|DOWN,ICE104|61.86|DOWN,ICE106|61.86|DOWN,ICE107|61.86|DOWN,ICE111|61.86|DOWN,ICE112|61.86|DOWN,ICE119|61.86|DOWN,ICE120|61.86|DOWN,ICE138|61.86|DOWN,ICE150|61.86|DOWN,ICE152|61.86|DOWN,ICE153|61.86|DOWN,ICE163|61.86|DOWN,ICE169|61.86…
AT1G73400	27598887-27599174	27598888	G	5SS	SPLICE_SITE_SNP	Col-0|69.95|NA,Qui-0|62.25|DOWN
AT1G73490	27633820-27633930	27633928	A	5SS	SPLICE_SITE_SNP	Col-0|69.93|NA,Bak-2|65.25|DOWN,ICE107|65.25|DOWN,ICE50|65.25|DOWN,ICE60|65.25|DOWN,ICE70|65.25|DOWN,ICE91|65.25|DOWN
AT1G76810	28832262-28832476	28832267	A	3SS	SPLICE_SIGNAL_SNP	Col-0|61.17|NA,Ler-1|59.05|DOWN
AT1G78320	29468096-29468178	29468098	T	3SS	SPLICE_SITE_SNP	Col-0|66.80|NA,Agu-1|60.92|DOWN,Don-0|60.92|DOWN,ICE33|60.92|DOWN,Nemrut-1|60.92|DOWN,Pra-6|60.92|DOWN,Qui-0|60.92|DOWN,Yeg-1|60.92|DOWN
AT2G02970	867521-867731	867729	G	5SS	SPLICE_SITE_SNP	Col-0|60.57|NA,Mer-6|54.75|DOWN
AT2G16880	7313798-7313966	7313799	C	3SS	SPLICE_SITE_SNP	Col-0|59.70|NA,Ler-0|55.56|DOWN
AT2G16880	7313841-7313961	7313842	C	3SS	SPLICE_SITE_SNP	Col-0|66.52|NA,Cdm-0|60.64|DOWN,Dog-4|60.64|DOWN,Fei-0|60.64|DOWN,ICE102|60.64|DOWN,ICE107|60.64|DOWN,ICE112|60.64|DOWN,ICE119|60.64|DOWN,ICE130|60.64|DOWN,ICE138|60.64|DOWN,ICE150|60.64|DOWN,ICE152|60.64|DOWN,ICE153|60.64|DOWN,ICE163|60.64|DOWN,ICE169|60.64|DOWN,ICE173|60.64|DOWN,ICE1|60.64|DOWN,ICE226|60.64|DOWN,ICE228|60.64|DOWN,ICE29|60.64|DOWN,ICE60|60.64|DOWN,ICE61|60.64|DOWN,ICE70|60.64|DO…
AT2G20950	9004651-9004714	9004712	A	3SS	SPLICE_SITE_SNP	Col-0|58.68|NA,Ler-1|52.79|DOWN
AT2G22330	9488672-9488962	9488671	A	5SS	SPLICE_SIGNAL_SNP	Col-0|56.42|NA,Agu-1|53.45|DOWN,Don-0|53.45|DOWN,Ey15-2|53.45|DOWN,ICE112|53.45|DOWN,ICE127|53.45|DOWN,ICE130|53.45|DOWN,ICE134|53.45|DOWN,ICE138|53.45|DOWN,ICE150|53.45|DOWN,ICE152|53.45|DOWN,ICE153|53.45|DOWN,ICE1|53.45|DOWN,ICE216|53.45|DOWN,ICE21|53.45|DOWN,ICE226|53.45|DOWN,ICE228|53.45|DOWN,ICE63|53.45|DOWN,ICE71|53.45|DOWN,ICE7|53.45|DOWN,Ped-0|53.45|DOWN,Pra-6|53.45|DOWN,Sha|53.45|DOWN,St…
AT2G23760	10112280-10112409	10112282	T	3SS	SPLICE_SITE_SNP	Col-0|58.56|NA,Don-0|52.67|DOWN,Ey15-2|52.67|DOWN,ICE226|52.67|DOWN,ICE228|52.67|DOWN
AT2G24180	10282064-10282704	10282069	C	5SS	SPLICE_SIGNAL_SNP	Col-0|56.46|NA,Ey15-2|58.62|UP
[truncated: 126 more rows]

## Sheet: ST8
Supplemental Table 8. Summary of SNPs affecting exitron splice sites in 82 A. thaliana ecotypes
[truncated: 5 more rows]

[truncated: 21 more sheets: ST9, ST10, ST11, ST12, ST13, ST14, ST15, ST16, ST17, ST18, ST19, ST20, ST21, ST22, ST23, ST24, ST25, ST26, ST27, ST28 …]
